# Supplementary material for: Comparative epigenomics in distantly related teleost species identifies conserved cis-regulatory nodes active during the vertebrate phylotypic period
Source: HighWire-hosted journal article supplement (doi:10.1101/gr.163915.113), 2014-04-07
Supplement: Supplemental_TableS1.xlsx [file Supplemental_TableS1.xlsx]

## Sheet: Hoja1
	Supplementary table 1
			Anatomical landmarks	D. rerio	O. latipes	O. latipes hpf
	Cleavage		2-cell stage	0,75 hpf	stage 3	1 hpf
			4-cell stage	1 hpf	stage 4	1.75 hpf
			8-cell stage	1.25 hpf	stage 5	2.33 hpf
			32-cell stage	1.75 hpf	stage 7	3,3 hpf
			64-cell stage	2 hpf	stage 8	4 hpf
	Gastrulation		Shield stage	6 hpf	stage 13	13 hpf
	Segmentation		100% epiboly	10 hpf	stage 19	28 hpf
			First somites condensation	10 hpf	stage 19	28 hpf
			Kupffer vesicle appearence	11 hpf	stage 17-18	25-26 hpf
			Optic bud formation	12 hpf	stage 18	26 hpf
			Otic placodes formation	14 hpf	stage 20	31 hpf
			Main brain subdivisions	16 hpf	stage 21	34 hpf
			Otic vesicle formation	18 hpf	stage 21	34 hpf
	Early Pharyngula		Tubular heart formation	22 hpf	stage 23	41 hpf
			Otic vesicle otoliths	22 hpf	stage 25	50 hpf
			Fin buds formation	22 hpf	stage 27	58 hpf
			Somitogenesis completed	24 hpf	stage 31	95 hpf
			Onset of heart beating	24 hpf	stage 24	44 hpf
			Optic cup folding completed	22-24 hpf	stage 23-24	41-44 hpf
			Lens vesicle formed	22-24 hpf	stage 23-24	41-44 hpf
			Midbrain-hindbrain boundary	22-24 hpf	stage 23-24	41-44 hpf
			Onset of RGCs differentiation	24-25 hpf	stage 25	50 hpf
			Onset of Blood circulation	24-25 hpf	stage 25	50 hpf
			Onset of RPE pigmentation	24-25 hpf	stage 25	50 hpf
	Late Pharyngula		Hepatic bud formation	28-30 hpf	stage 25	50 hpf
	/Hatching		Onset of heart looping	36 hpf	stage 29	74 hpf
			Pancreatic bud formation	40 hpf	stage 28	64 hpf
			Gill blood vesels formation	48 hpf	stage 31	95 hpf
			Hatching	60hpf	stage 39	9 dpf
			Mouth protruding	72 hpf	stage 36	6 dpf
			Synchronic development
			Mild heterochrony (Zf earlier)
			Marked heterochrony (Zf earlier)
			Mild heterochrony (Medaka earlier)
