# Supplementary material for: Comparative epigenomics in distantly related teleost species identifies conserved cis-regulatory nodes active during the vertebrate phylotypic period
Source: HighWire-hosted journal article supplement (doi:10.1101/gr.163915.113), 2014-04-07
Supplement: Supplemental_TableS2.xlsx [file Supplemental_TableS2.xlsx]

## Sheet: Orthologous genes
List of orthologous genes
D. rerio	O. latipes	X. tropicalis	M. musculus
ENSDARG00000058207	ENSORLG00000000002	ENSXETG00000004155	ENSMUSG00000058835
ENSDARG00000006040	ENSORLG00000000005	ENSXETG00000004154	ENSMUSG00000049439
ENSDARG00000016038	ENSORLG00000000006	ENSXETG00000030041	ENSMUSG00000028497
ENSDARG00000074248	ENSORLG00000000008	ENSXETG00000027500	ENSMUSG00000038079
ENSDARG00000086555	ENSORLG00000000020	ENSXETG00000027421	ENSMUSG00000096010
ENSDARG00000076924	ENSORLG00000000024	ENSXETG00000003686	ENSMUSG00000044037
ENSDARG00000055447	ENSORLG00000000025	ENSXETG00000025586	ENSMUSG00000073421
ENSDARG00000038422	ENSORLG00000000027	ENSXETG00000003746	ENSMUSG00000095463
ENSDARG00000013000	ENSORLG00000000029	ENSXETG00000003798	ENSMUSG00000053825
ENSDARG00000070995	ENSORLG00000000030	ENSXETG00000019407	ENSMUSG00000026113
ENSDARG00000041068	ENSORLG00000000031	ENSXETG00000018428	ENSMUSG00000025190
ENSDARG00000011777	ENSORLG00000000034	ENSXETG00000003797	ENSMUSG00000031078
ENSDARG00000078733	ENSORLG00000000036	ENSXETG00000009473	ENSMUSG00000064105
ENSDARG00000018944	ENSORLG00000000039	ENSXETG00000003443	ENSMUSG00000025176
ENSDARG00000024744	ENSORLG00000000040	ENSXETG00000000625	ENSMUSG00000061576
ENSDARG00000007278	ENSORLG00000000041	ENSXETG00000023596	ENSMUSG00000027699
ENSDARG00000070907	ENSORLG00000000044	ENSXETG00000031509	ENSMUSG00000025019
ENSDARG00000017007	ENSORLG00000000050	ENSXETG00000031753	ENSMUSG00000028341
ENSDARG00000042458	ENSORLG00000000053	ENSXETG00000019391	ENSMUSG00000022881
ENSDARG00000044954	ENSORLG00000000055	ENSXETG00000003405	ENSMUSG00000025020
ENSDARG00000003193	ENSORLG00000000058	ENSXETG00000006038	ENSMUSG00000038618
ENSDARG00000077791	ENSORLG00000000060	ENSXETG00000004614	ENSMUSG00000053046
ENSDARG00000078415	ENSORLG00000000061	ENSXETG00000018622	ENSMUSG00000051652
ENSDARG00000083189	ENSORLG00000000062	ENSXETG00000003417	ENSMUSG00000025154
ENSDARG00000062000	ENSORLG00000000065	ENSXETG00000003783	ENSMUSG00000032724
ENSDARG00000039452	ENSORLG00000000069	ENSXETG00000019639	ENSMUSG00000037012
ENSDARG00000017058	ENSORLG00000000070	ENSXETG00000001028	ENSMUSG00000040434
ENSDARG00000059529	ENSORLG00000000072	ENSXETG00000013796	ENSMUSG00000014837
ENSDARG00000018693	ENSORLG00000000073	ENSXETG00000006932	ENSMUSG00000024304
ENSDARG00000013582	ENSORLG00000000074	ENSXETG00000013728	ENSMUSG00000046707
ENSDARG00000078309	ENSORLG00000000078	ENSXETG00000001621	ENSMUSG00000032358
ENSDARG00000007715	ENSORLG00000000080	ENSXETG00000004453	ENSMUSG00000050217
ENSDARG00000006242	ENSORLG00000000081	ENSXETG00000005239	ENSMUSG00000028788
ENSDARG00000016239	ENSORLG00000000084	ENSXETG00000008827	ENSMUSG00000025487
ENSDARG00000058824	ENSORLG00000000085	ENSXETG00000022060	ENSMUSG00000003299
ENSDARG00000035819	ENSORLG00000000086	ENSXETG00000032567	ENSMUSG00000025486
ENSDARG00000035820	ENSORLG00000000088	ENSXETG00000032197	ENSMUSG00000025496
ENSDARG00000057698	ENSORLG00000000092	ENSXETG00000011942	ENSMUSG00000004552
ENSDARG00000042742	ENSORLG00000000093	ENSXETG00000023132	ENSMUSG00000026470
ENSDARG00000078416	ENSORLG00000000098	ENSXETG00000000237	ENSMUSG00000026872
ENSDARG00000011188	ENSORLG00000000099	ENSXETG00000021720	ENSMUSG00000052155
ENSDARG00000035891	ENSORLG00000000100	ENSXETG00000007571	ENSMUSG00000030607
ENSDARG00000090989	ENSORLG00000000102	ENSXETG00000021952	ENSMUSG00000018678
ENSDARG00000029014	ENSORLG00000000103	ENSXETG00000021718	ENSMUSG00000026761
ENSDARG00000059581	ENSORLG00000000104	ENSXETG00000018214	ENSMUSG00000036792
ENSDARG00000060442	ENSORLG00000000105	ENSXETG00000021600	ENSMUSG00000013858
ENSDARG00000044942	ENSORLG00000000106	ENSXETG00000014731	ENSMUSG00000018882
ENSDARG00000076143	ENSORLG00000000107	ENSXETG00000004653	ENSMUSG00000033526
ENSDARG00000076027	ENSORLG00000000108	ENSXETG00000004486	ENSMUSG00000026764
ENSDARG00000040779	ENSORLG00000000109	ENSXETG00000021641	ENSMUSG00000013833
ENSDARG00000044943	ENSORLG00000000111	ENSXETG00000014725	ENSMUSG00000001441
ENSDARG00000079000	ENSORLG00000000116	ENSXETG00000032616	ENSMUSG00000043909
ENSDARG00000010481	ENSORLG00000000117	ENSXETG00000030733	ENSMUSG00000051223
ENSDARG00000038866	ENSORLG00000000118	ENSXETG00000004734	ENSMUSG00000033382
ENSDARG00000017337	ENSORLG00000000119	ENSXETG00000025079	ENSMUSG00000050088
ENSDARG00000003846	ENSORLG00000000120	ENSXETG00000019978	ENSMUSG00000024829
ENSDARG00000005374	ENSORLG00000000123	ENSXETG00000004708	ENSMUSG00000027263
ENSDARG00000020054	ENSORLG00000000125	ENSXETG00000022155	ENSMUSG00000063558
ENSDARG00000035853	ENSORLG00000000126	ENSXETG00000019049	ENSMUSG00000038069
ENSDARG00000005518	ENSORLG00000000128	ENSXETG00000006935	ENSMUSG00000028544
ENSDARG00000045832	ENSORLG00000000129	ENSXETG00000030744	ENSMUSG00000021647
ENSDARG00000009942	ENSORLG00000000130	ENSXETG00000024394	ENSMUSG00000017499
ENSDARG00000020000	ENSORLG00000000133	ENSXETG00000010910	ENSMUSG00000036206
ENSDARG00000023537	ENSORLG00000000137	ENSXETG00000006186	ENSMUSG00000019256
ENSDARG00000040700	ENSORLG00000000144	ENSXETG00000015250	ENSMUSG00000002881
ENSDARG00000045638	ENSORLG00000000145	ENSXETG00000022751	ENSMUSG00000029700
ENSDARG00000010078	ENSORLG00000000146	ENSXETG00000001244	ENSMUSG00000039509
ENSDARG00000031898	ENSORLG00000000147	ENSXETG00000017604	ENSMUSG00000041120
ENSDARG00000078888	ENSORLG00000000149	ENSXETG00000001299	ENSMUSG00000028068
ENSDARG00000062812	ENSORLG00000000151	ENSXETG00000024709	ENSMUSG00000026103
ENSDARG00000003564	ENSORLG00000000152	ENSXETG00000008150	ENSMUSG00000078440
ENSDARG00000087895	ENSORLG00000000153	ENSXETG00000019608	ENSMUSG00000024294
ENSDARG00000046004	ENSORLG00000000154	ENSXETG00000017607	ENSMUSG00000028745
ENSDARG00000095340	ENSORLG00000000156	ENSXETG00000030517	ENSMUSG00000069312
ENSDARG00000052343	ENSORLG00000000158	ENSXETG00000023103	ENSMUSG00000029155
ENSDARG00000013009	ENSORLG00000000160	ENSXETG00000017414	ENSMUSG00000047719
ENSDARG00000006266	ENSORLG00000000162	ENSXETG00000004649	ENSMUSG00000026104
ENSDARG00000068995	ENSORLG00000000168	ENSXETG00000011863	ENSMUSG00000078851
ENSDARG00000052341	ENSORLG00000000171	ENSXETG00000011676	ENSMUSG00000029156
ENSDARG00000052114	ENSORLG00000000174	ENSXETG00000001294	ENSMUSG00000030527
ENSDARG00000052118	ENSORLG00000000178	ENSXETG00000015490	ENSMUSG00000043822
ENSDARG00000059862	ENSORLG00000000181	ENSXETG00000019606	ENSMUSG00000029062
ENSDARG00000058259	ENSORLG00000000182	ENSXETG00000025040	ENSMUSG00000016028
ENSDARG00000058392	ENSORLG00000000183	ENSXETG00000016889	ENSMUSG00000021536
ENSDARG00000078736	ENSORLG00000000189	ENSXETG00000030453	ENSMUSG00000024871
ENSDARG00000074535	ENSORLG00000000190	ENSXETG00000001552	ENSMUSG00000045083
ENSDARG00000074708	ENSORLG00000000198	ENSXETG00000005917	ENSMUSG00000037683
ENSDARG00000074564	ENSORLG00000000200	ENSXETG00000022464	ENSMUSG00000058966
ENSDARG00000056627	ENSORLG00000000201	ENSXETG00000007899	ENSMUSG00000021508
ENSDARG00000096221	ENSORLG00000000202	ENSXETG00000025955	ENSMUSG00000030443
ENSDARG00000019732	ENSORLG00000000203	ENSXETG00000019935	ENSMUSG00000024012
ENSDARG00000076779	ENSORLG00000000207	ENSXETG00000003827	ENSMUSG00000036501
ENSDARG00000056338	ENSORLG00000000208	ENSXETG00000002510	ENSMUSG00000040842
ENSDARG00000093106	ENSORLG00000000209	ENSXETG00000025956	ENSMUSG00000074406
ENSDARG00000019326	ENSORLG00000000212	ENSXETG00000019542	ENSMUSG00000020528
ENSDARG00000075989	ENSORLG00000000213	ENSXETG00000027920	ENSMUSG00000006304
ENSDARG00000070686	ENSORLG00000000218	ENSXETG00000026763	ENSMUSG00000030682
ENSDARG00000000853	ENSORLG00000000219	ENSXETG00000000902	ENSMUSG00000042046
ENSDARG00000036161	ENSORLG00000000221	ENSXETG00000003833	ENSMUSG00000007836
ENSDARG00000092098	ENSORLG00000000222	ENSXETG00000020708	ENSMUSG00000048327
ENSDARG00000057239	ENSORLG00000000223	ENSXETG00000030150	ENSMUSG00000006764
ENSDARG00000074899	ENSORLG00000000228	ENSXETG00000011341	ENSMUSG00000059981
ENSDARG00000063661	ENSORLG00000000229	ENSXETG00000000974	ENSMUSG00000009772
ENSDARG00000053691	ENSORLG00000000230	ENSXETG00000010676	ENSMUSG00000079562
ENSDARG00000093007	ENSORLG00000000232	ENSXETG00000025878	ENSMUSG00000031843
ENSDARG00000055723	ENSORLG00000000233	ENSXETG00000022536	ENSMUSG00000090877
ENSDARG00000004748	ENSORLG00000000238	ENSXETG00000006285	ENSMUSG00000044139
ENSDARG00000061890	ENSORLG00000000244	ENSXETG00000019402	ENSMUSG00000036622
ENSDARG00000068099	ENSORLG00000000245	ENSXETG00000003799	ENSMUSG00000031077
ENSDARG00000071395	ENSORLG00000000246	ENSXETG00000006455	ENSMUSG00000021820
ENSDARG00000088352	ENSORLG00000000247	ENSXETG00000016619	ENSMUSG00000030823
ENSDARG00000001057	ENSORLG00000000248	ENSXETG00000011846	ENSMUSG00000023988
ENSDARG00000019706	ENSORLG00000000251	ENSXETG00000031840	ENSMUSG00000063935
ENSDARG00000088861	ENSORLG00000000253	ENSXETG00000020813	ENSMUSG00000061374
ENSDARG00000009131	ENSORLG00000000255	ENSXETG00000009830	ENSMUSG00000029219
ENSDARG00000019213	ENSORLG00000000259	ENSXETG00000021047	ENSMUSG00000037373
ENSDARG00000032114	ENSORLG00000000260	ENSXETG00000009829	ENSMUSG00000036087
ENSDARG00000075805	ENSORLG00000000264	ENSXETG00000032722	ENSMUSG00000054321
ENSDARG00000075768	ENSORLG00000000267	ENSXETG00000013435	ENSMUSG00000009863
ENSDARG00000088993	ENSORLG00000000268	ENSXETG00000012120	ENSMUSG00000025736
ENSDARG00000022648	ENSORLG00000000274	ENSXETG00000017576	ENSMUSG00000041161
ENSDARG00000002732	ENSORLG00000000275	ENSXETG00000021044	ENSMUSG00000037379
ENSDARG00000046007	ENSORLG00000000277	ENSXETG00000000973	ENSMUSG00000042066
ENSDARG00000015111	ENSORLG00000000279	ENSXETG00000020607	ENSMUSG00000005481
ENSDARG00000063524	ENSORLG00000000283	ENSXETG00000008496	ENSMUSG00000031075
ENSDARG00000069467	ENSORLG00000000285	ENSXETG00000008342	ENSMUSG00000034275
ENSDARG00000043631	ENSORLG00000000287	ENSXETG00000020352	ENSMUSG00000005687
ENSDARG00000078515	ENSORLG00000000288	ENSXETG00000019936	ENSMUSG00000006342
ENSDARG00000074833	ENSORLG00000000289	ENSXETG00000025489	ENSMUSG00000031073
ENSDARG00000060600	ENSORLG00000000290	ENSXETG00000010331	ENSMUSG00000037326
ENSDARG00000059360	ENSORLG00000000292	ENSXETG00000001701	ENSMUSG00000071172
ENSDARG00000068095	ENSORLG00000000295	ENSXETG00000001992	ENSMUSG00000050917
ENSDARG00000036438	ENSORLG00000000297	ENSXETG00000003396	ENSMUSG00000037916
ENSDARG00000062579	ENSORLG00000000299	ENSXETG00000018365	ENSMUSG00000040680
ENSDARG00000052766	ENSORLG00000000300	ENSXETG00000022868	ENSMUSG00000011832
ENSDARG00000068094	ENSORLG00000000302	ENSXETG00000002761	ENSMUSG00000031074
ENSDARG00000032617	ENSORLG00000000305	ENSXETG00000021042	ENSMUSG00000008090
ENSDARG00000063068	ENSORLG00000000306	ENSXETG00000007253	ENSMUSG00000019769
ENSDARG00000089344	ENSORLG00000000309	ENSXETG00000000656	ENSMUSG00000046792
ENSDARG00000038097	ENSORLG00000000310	ENSXETG00000010336	ENSMUSG00000025728
ENSDARG00000074184	ENSORLG00000000312	ENSXETG00000022775	ENSMUSG00000041444
ENSDARG00000056874	ENSORLG00000000313	ENSXETG00000016992	ENSMUSG00000061584
ENSDARG00000033009	ENSORLG00000000314	ENSXETG00000027927	ENSMUSG00000016559
ENSDARG00000054950	ENSORLG00000000316	ENSXETG00000033667	ENSMUSG00000022544
ENSDARG00000035750	ENSORLG00000000317	ENSXETG00000000267	ENSMUSG00000070348
ENSDARG00000032237	ENSORLG00000000318	ENSXETG00000000957	ENSMUSG00000029176
ENSDARG00000036715	ENSORLG00000000320	ENSXETG00000020049	ENSMUSG00000005625
ENSDARG00000074589	ENSORLG00000000322	ENSXETG00000009700	ENSMUSG00000001768
ENSDARG00000001975	ENSORLG00000000323	ENSXETG00000004704	ENSMUSG00000031891
ENSDARG00000043483	ENSORLG00000000324	ENSXETG00000018775	ENSMUSG00000041578
ENSDARG00000016181	ENSORLG00000000325	ENSXETG00000021457	ENSMUSG00000005566
ENSDARG00000016022	ENSORLG00000000326	ENSXETG00000018872	ENSMUSG00000041703
ENSDARG00000077546	ENSORLG00000000329	ENSXETG00000000344	ENSMUSG00000039199
ENSDARG00000077768	ENSORLG00000000330	ENSXETG00000021146	ENSMUSG00000032688
ENSDARG00000054963	ENSORLG00000000332	ENSXETG00000025674	ENSMUSG00000039427
ENSDARG00000087442	ENSORLG00000000333	ENSXETG00000030059	ENSMUSG00000078564
ENSDARG00000030463	ENSORLG00000000334	ENSXETG00000000345	ENSMUSG00000014846
ENSDARG00000056922	ENSORLG00000000336	ENSXETG00000019349	ENSMUSG00000040488
ENSDARG00000015937	ENSORLG00000000337	ENSXETG00000002789	ENSMUSG00000006021
ENSDARG00000016570	ENSORLG00000000338	ENSXETG00000000709	ENSMUSG00000005268
ENSDARG00000043624	ENSORLG00000000341	ENSXETG00000031055	ENSMUSG00000028744
ENSDARG00000038024	ENSORLG00000000342	ENSXETG00000008469	ENSMUSG00000075273
ENSDARG00000073892	ENSORLG00000000343	ENSXETG00000029955	ENSMUSG00000035093
ENSDARG00000078833	ENSORLG00000000344	ENSXETG00000020615	ENSMUSG00000036381
ENSDARG00000040009	ENSORLG00000000345	ENSXETG00000033874	ENSMUSG00000058056
ENSDARG00000020178	ENSORLG00000000350	ENSXETG00000010244	ENSMUSG00000030411
ENSDARG00000002285	ENSORLG00000000351	ENSXETG00000008633	ENSMUSG00000004567
ENSDARG00000037390	ENSORLG00000000352	ENSXETG00000032611	ENSMUSG00000030206
ENSDARG00000020191	ENSORLG00000000353	ENSXETG00000006754	ENSMUSG00000062168
ENSDARG00000056331	ENSORLG00000000355	ENSXETG00000002023	ENSMUSG00000027893
ENSDARG00000074238	ENSORLG00000000358	ENSXETG00000033963	ENSMUSG00000063952
ENSDARG00000009074	ENSORLG00000000359	ENSXETG00000004944	ENSMUSG00000031641
ENSDARG00000028982	ENSORLG00000000361	ENSXETG00000020685	ENSMUSG00000041650
ENSDARG00000031702	ENSORLG00000000364	ENSXETG00000034199	ENSMUSG00000052920
ENSDARG00000011259	ENSORLG00000000365	ENSXETG00000016479	ENSMUSG00000030523
ENSDARG00000014963	ENSORLG00000000368	ENSXETG00000012223	ENSMUSG00000029535
ENSDARG00000035329	ENSORLG00000000369	ENSXETG00000002865	ENSMUSG00000078144
ENSDARG00000094175	ENSORLG00000000380	ENSXETG00000008801	ENSMUSG00000060510
ENSDARG00000060184	ENSORLG00000000385	ENSXETG00000020605	ENSMUSG00000057672
ENSDARG00000090219	ENSORLG00000000386	ENSXETG00000009814	ENSMUSG00000039382
ENSDARG00000024314	ENSORLG00000000388	ENSXETG00000026099	ENSMUSG00000031770
ENSDARG00000058470	ENSORLG00000000393	ENSXETG00000031922	ENSMUSG00000004864
ENSDARG00000075460	ENSORLG00000000397	ENSXETG00000031948	ENSMUSG00000039629
ENSDARG00000045301	ENSORLG00000000401	ENSXETG00000020897	ENSMUSG00000056812
ENSDARG00000076870	ENSORLG00000000402	ENSXETG00000033366	ENSMUSG00000014444
ENSDARG00000078680	ENSORLG00000000406	ENSXETG00000027815	ENSMUSG00000021614
ENSDARG00000008279	ENSORLG00000000408	ENSXETG00000022865	ENSMUSG00000002948
ENSDARG00000051854	ENSORLG00000000411	ENSXETG00000011255	ENSMUSG00000006585
ENSDARG00000013855	ENSORLG00000000412	ENSXETG00000008777	ENSMUSG00000031766
ENSDARG00000002336	ENSORLG00000000415	ENSXETG00000002875	ENSMUSG00000040856
ENSDARG00000087762	ENSORLG00000000417	ENSXETG00000003366	ENSMUSG00000024511
ENSDARG00000087070	ENSORLG00000000420	ENSXETG00000000727	ENSMUSG00000069743
ENSDARG00000068787	ENSORLG00000000421	ENSXETG00000002025	ENSMUSG00000027894
ENSDARG00000091402	ENSORLG00000000423	ENSXETG00000005830	ENSMUSG00000029388
ENSDARG00000029250	ENSORLG00000000424	ENSXETG00000029947	ENSMUSG00000038425
ENSDARG00000087576	ENSORLG00000000426	ENSXETG00000030476	ENSMUSG00000030380
ENSDARG00000031098	ENSORLG00000000427	ENSXETG00000002882	ENSMUSG00000003438
ENSDARG00000009864	ENSORLG00000000428	ENSXETG00000005825	ENSMUSG00000029389
ENSDARG00000073847	ENSORLG00000000433	ENSXETG00000002029	ENSMUSG00000045365
ENSDARG00000036592	ENSORLG00000000434	ENSXETG00000014132	ENSMUSG00000022948
ENSDARG00000079620	ENSORLG00000000437	ENSXETG00000002000	ENSMUSG00000050947
ENSDARG00000055570	ENSORLG00000000438	ENSXETG00000032882	ENSMUSG00000046793
ENSDARG00000022350	ENSORLG00000000439	ENSXETG00000023155	ENSMUSG00000031644
ENSDARG00000042282	ENSORLG00000000441	ENSXETG00000007527	ENSMUSG00000027111
ENSDARG00000055613	ENSORLG00000000442	ENSXETG00000020733	ENSMUSG00000027942
ENSDARG00000023914	ENSORLG00000000445	ENSXETG00000019104	ENSMUSG00000067941
ENSDARG00000054456	ENSORLG00000000447	ENSXETG00000032979	ENSMUSG00000013921
ENSDARG00000035327	ENSORLG00000000449	ENSXETG00000019108	ENSMUSG00000030399
ENSDARG00000009564	ENSORLG00000000450	ENSXETG00000004623	ENSMUSG00000031098
ENSDARG00000036587	ENSORLG00000000452	ENSXETG00000033405	ENSMUSG00000051483
ENSDARG00000088554	ENSORLG00000000453	ENSXETG00000002009	ENSMUSG00000027889
ENSDARG00000035326	ENSORLG00000000459	ENSXETG00000005319	ENSMUSG00000047586
ENSDARG00000008785	ENSORLG00000000461	ENSXETG00000012269	ENSMUSG00000020664
ENSDARG00000088593	ENSORLG00000000464	ENSXETG00000001015	ENSMUSG00000027221
ENSDARG00000042041	ENSORLG00000000466	ENSXETG00000000908	ENSMUSG00000028417
ENSDARG00000015611	ENSORLG00000000467	ENSXETG00000011677	ENSMUSG00000049907
ENSDARG00000074967	ENSORLG00000000469	ENSXETG00000020990	ENSMUSG00000033808
ENSDARG00000020334	ENSORLG00000000470	ENSXETG00000004305	ENSMUSG00000043733
ENSDARG00000040005	ENSORLG00000000475	ENSXETG00000011678	ENSMUSG00000062110
ENSDARG00000076508	ENSORLG00000000478	ENSXETG00000021218	ENSMUSG00000056755
ENSDARG00000026908	ENSORLG00000000481	ENSXETG00000005824	ENSMUSG00000029390
ENSDARG00000053196	ENSORLG00000000484	ENSXETG00000017426	ENSMUSG00000028991
ENSDARG00000035324	ENSORLG00000000486	ENSXETG00000033350	ENSMUSG00000015165
ENSDARG00000073817	ENSORLG00000000489	ENSXETG00000030285	ENSMUSG00000060260
ENSDARG00000062137	ENSORLG00000000491	ENSXETG00000030654	ENSMUSG00000037286
ENSDARG00000043323	ENSORLG00000000492	ENSXETG00000011680	ENSMUSG00000029228
ENSDARG00000079915	ENSORLG00000000493	ENSXETG00000021222	ENSMUSG00000029676
ENSDARG00000058650	ENSORLG00000000494	ENSXETG00000019426	ENSMUSG00000042737
ENSDARG00000009939	ENSORLG00000000496	ENSXETG00000009596	ENSMUSG00000021973
ENSDARG00000074563	ENSORLG00000000497	ENSXETG00000022118	ENSMUSG00000039904
ENSDARG00000006896	ENSORLG00000000498	ENSXETG00000016325	ENSMUSG00000026890
ENSDARG00000036005	ENSORLG00000000499	ENSXETG00000002259	ENSMUSG00000050017
ENSDARG00000027582	ENSORLG00000000502	ENSXETG00000017425	ENSMUSG00000028989
ENSDARG00000038865	ENSORLG00000000503	ENSXETG00000031495	ENSMUSG00000029098
ENSDARG00000052148	ENSORLG00000000509	ENSXETG00000016336	ENSMUSG00000047250
ENSDARG00000043296	ENSORLG00000000511	ENSXETG00000018674	ENSMUSG00000026638
ENSDARG00000086495	ENSORLG00000000516	ENSXETG00000033219	ENSMUSG00000085925
ENSDARG00000008560	ENSORLG00000000523	ENSXETG00000020916	ENSMUSG00000029458
ENSDARG00000038166	ENSORLG00000000524	ENSXETG00000022125	ENSMUSG00000010051
ENSDARG00000078006	ENSORLG00000000526	ENSXETG00000006816	ENSMUSG00000020811
ENSDARG00000035761	ENSORLG00000000527	ENSXETG00000009104	ENSMUSG00000029730
ENSDARG00000079388	ENSORLG00000000529	ENSXETG00000001763	ENSMUSG00000041936
ENSDARG00000089591	ENSORLG00000000530	ENSXETG00000006758	ENSMUSG00000000561
ENSDARG00000010145	ENSORLG00000000532	ENSXETG00000023451	ENSMUSG00000059555
ENSDARG00000061899	ENSORLG00000000533	ENSXETG00000022138	ENSMUSG00000046192
ENSDARG00000053878	ENSORLG00000000540	ENSXETG00000023608	ENSMUSG00000025477
ENSDARG00000026166	ENSORLG00000000542	ENSXETG00000001223	ENSMUSG00000029163
ENSDARG00000045752	ENSORLG00000000544	ENSXETG00000002231	ENSMUSG00000024670
ENSDARG00000070566	ENSORLG00000000547	ENSXETG00000000748	ENSMUSG00000026926
ENSDARG00000027200	ENSORLG00000000550	ENSXETG00000003573	ENSMUSG00000031950
ENSDARG00000079173	ENSORLG00000000554	ENSXETG00000009101	ENSMUSG00000019494
ENSDARG00000078655	ENSORLG00000000555	ENSXETG00000009758	ENSMUSG00000026925
ENSDARG00000039500	ENSORLG00000000558	ENSXETG00000009607	ENSMUSG00000036957
ENSDARG00000076381	ENSORLG00000000564	ENSXETG00000022389	ENSMUSG00000003528
ENSDARG00000006691	ENSORLG00000000565	ENSXETG00000003944	ENSMUSG00000080054
ENSDARG00000043317	ENSORLG00000000569	ENSXETG00000021049	ENSMUSG00000005672
ENSDARG00000037640	ENSORLG00000000578	ENSXETG00000009097	ENSMUSG00000070837
ENSDARG00000086355	ENSORLG00000000581	ENSXETG00000014784	ENSMUSG00000049571
ENSDARG00000003877	ENSORLG00000000583	ENSXETG00000013671	ENSMUSG00000042323
ENSDARG00000035747	ENSORLG00000000588	ENSXETG00000004067	ENSMUSG00000044502
ENSDARG00000040503	ENSORLG00000000589	ENSXETG00000002899	ENSMUSG00000044786
ENSDARG00000019753	ENSORLG00000000590	ENSXETG00000033200	ENSMUSG00000000794
ENSDARG00000017321	ENSORLG00000000592	ENSXETG00000021061	ENSMUSG00000062960
ENSDARG00000037639	ENSORLG00000000593	ENSXETG00000004060	ENSMUSG00000049691
ENSDARG00000055475	ENSORLG00000000594	ENSXETG00000024836	ENSMUSG00000050621
ENSDARG00000027310	ENSORLG00000000599	ENSXETG00000014016	ENSMUSG00000018819
ENSDARG00000006963	ENSORLG00000000603	ENSXETG00000001784	ENSMUSG00000002718
ENSDARG00000041450	ENSORLG00000000606	ENSXETG00000006639	ENSMUSG00000077450
ENSDARG00000046119	ENSORLG00000000607	ENSXETG00000010729	ENSMUSG00000030744
ENSDARG00000043307	ENSORLG00000000608	ENSXETG00000021063	ENSMUSG00000029233
ENSDARG00000063600	ENSORLG00000000612	ENSXETG00000010449	ENSMUSG00000051727
ENSDARG00000012340	ENSORLG00000000613	ENSXETG00000023918	ENSMUSG00000004266
ENSDARG00000034600	ENSORLG00000000614	ENSXETG00000026574	ENSMUSG00000029234
ENSDARG00000036180	ENSORLG00000000615	ENSXETG00000010845	ENSMUSG00000032218
ENSDARG00000054342	ENSORLG00000000616	ENSXETG00000015777	ENSMUSG00000073085
ENSDARG00000076994	ENSORLG00000000620	ENSXETG00000020470	ENSMUSG00000029090
ENSDARG00000060095	ENSORLG00000000621	ENSXETG00000016003	ENSMUSG00000050556
ENSDARG00000044267	ENSORLG00000000622	ENSXETG00000022072	ENSMUSG00000026021
ENSDARG00000019236	ENSORLG00000000624	ENSXETG00000011293	ENSMUSG00000031584
ENSDARG00000016765	ENSORLG00000000625	ENSXETG00000017663	ENSMUSG00000028049
ENSDARG00000026070	ENSORLG00000000626	ENSXETG00000003177	ENSMUSG00000027215
ENSDARG00000073738	ENSORLG00000000628	ENSXETG00000021454	ENSMUSG00000007379
ENSDARG00000076724	ENSORLG00000000630	ENSXETG00000022408	ENSMUSG00000041720
ENSDARG00000077402	ENSORLG00000000632	ENSXETG00000019495	ENSMUSG00000038462
ENSDARG00000043019	ENSORLG00000000634	ENSXETG00000021068	ENSMUSG00000036435
ENSDARG00000087343	ENSORLG00000000635	ENSXETG00000006969	ENSMUSG00000051022
ENSDARG00000052094	ENSORLG00000000636	ENSXETG00000033664	ENSMUSG00000015468
ENSDARG00000041314	ENSORLG00000000638	ENSXETG00000030956	ENSMUSG00000022354
ENSDARG00000000103	ENSORLG00000000639	ENSXETG00000019058	ENSMUSG00000020900
ENSDARG00000063610	ENSORLG00000000640	ENSXETG00000010447	ENSMUSG00000025133
ENSDARG00000076393	ENSORLG00000000647	ENSXETG00000031066	ENSMUSG00000062373
ENSDARG00000062884	ENSORLG00000000648	ENSXETG00000000471	ENSMUSG00000024383
ENSDARG00000025076	ENSORLG00000000652	ENSXETG00000018177	ENSMUSG00000021636
ENSDARG00000060094	ENSORLG00000000653	ENSXETG00000001780	ENSMUSG00000017969
ENSDARG00000033832	ENSORLG00000000655	ENSXETG00000021450	ENSMUSG00000070385
ENSDARG00000042722	ENSORLG00000000661	ENSXETG00000012184	ENSMUSG00000061132
ENSDARG00000028943	ENSORLG00000000662	ENSXETG00000017462	ENSMUSG00000022353
ENSDARG00000070148	ENSORLG00000000664	ENSXETG00000030743	ENSMUSG00000020810
ENSDARG00000005108	ENSORLG00000000668	ENSXETG00000018182	ENSMUSG00000021638
ENSDARG00000059722	ENSORLG00000000672	ENSXETG00000021621	ENSMUSG00000036352
ENSDARG00000059917	ENSORLG00000000674	ENSXETG00000012186	ENSMUSG00000025010
ENSDARG00000059634	ENSORLG00000000676	ENSXETG00000001447	ENSMUSG00000030264
ENSDARG00000088248	ENSORLG00000000677	ENSXETG00000011781	ENSMUSG00000051343
ENSDARG00000068457	ENSORLG00000000678	ENSXETG00000024952	ENSMUSG00000061723
ENSDARG00000012915	ENSORLG00000000679	ENSXETG00000000036	ENSMUSG00000053898
ENSDARG00000079139	ENSORLG00000000682	ENSXETG00000019540	ENSMUSG00000061878
ENSDARG00000035122	ENSORLG00000000683	ENSXETG00000021592	ENSMUSG00000026933
ENSDARG00000087451	ENSORLG00000000686	ENSXETG00000033883	ENSMUSG00000060032
ENSDARG00000026137	ENSORLG00000000692	ENSXETG00000011782	ENSMUSG00000033720
ENSDARG00000030110	ENSORLG00000000694	ENSXETG00000001320	ENSMUSG00000009471
ENSDARG00000077901	ENSORLG00000000695	ENSXETG00000009734	ENSMUSG00000038664
ENSDARG00000086990	ENSORLG00000000698	ENSXETG00000014820	ENSMUSG00000022211
ENSDARG00000060089	ENSORLG00000000700	ENSXETG00000012188	ENSMUSG00000040565
ENSDARG00000011317	ENSORLG00000000704	ENSXETG00000022213	ENSMUSG00000050541
ENSDARG00000074758	ENSORLG00000000707	ENSXETG00000021448	ENSMUSG00000068823
ENSDARG00000051874	ENSORLG00000000708	ENSXETG00000005165	ENSMUSG00000032327
ENSDARG00000006345	ENSORLG00000000709	ENSXETG00000017118	ENSMUSG00000031935
ENSDARG00000061692	ENSORLG00000000710	ENSXETG00000013061	ENSMUSG00000048967
ENSDARG00000071669	ENSORLG00000000713	ENSXETG00000011764	ENSMUSG00000033706
ENSDARG00000075552	ENSORLG00000000718	ENSXETG00000034090	ENSMUSG00000020802
ENSDARG00000033956	ENSORLG00000000719	ENSXETG00000030290	ENSMUSG00000043659
ENSDARG00000006192	ENSORLG00000000720	ENSXETG00000013053	ENSMUSG00000036180
ENSDARG00000069422	ENSORLG00000000722	ENSXETG00000006731	ENSMUSG00000001056
ENSDARG00000036567	ENSORLG00000000725	ENSXETG00000019534	ENSMUSG00000020804
ENSDARG00000060103	ENSORLG00000000726	ENSXETG00000012190	ENSMUSG00000039652
ENSDARG00000006889	ENSORLG00000000727	ENSXETG00000021376	ENSMUSG00000041708
ENSDARG00000024141	ENSORLG00000000729	ENSXETG00000021728	ENSMUSG00000062694
ENSDARG00000045483	ENSORLG00000000732	ENSXETG00000009403	ENSMUSG00000055003
ENSDARG00000087752	ENSORLG00000000737	ENSXETG00000007674	ENSMUSG00000033596
ENSDARG00000056314	ENSORLG00000000739	ENSXETG00000006979	ENSMUSG00000030111
ENSDARG00000032552	ENSORLG00000000740	ENSXETG00000012197	ENSMUSG00000023307
ENSDARG00000060981	ENSORLG00000000742	ENSXETG00000021446	ENSMUSG00000027854
ENSDARG00000004956	ENSORLG00000000743	ENSXETG00000016118	ENSMUSG00000001383
ENSDARG00000011257	ENSORLG00000000744	ENSXETG00000003134	ENSMUSG00000022425
ENSDARG00000035325	ENSORLG00000000746	ENSXETG00000025300	ENSMUSG00000024097
ENSDARG00000078942	ENSORLG00000000747	ENSXETG00000014586	ENSMUSG00000031109
ENSDARG00000075570	ENSORLG00000000751	ENSXETG00000030851	ENSMUSG00000056999
ENSDARG00000003961	ENSORLG00000000752	ENSXETG00000000087	ENSMUSG00000023249
ENSDARG00000002816	ENSORLG00000000753	ENSXETG00000022942	ENSMUSG00000021708
ENSDARG00000036541	ENSORLG00000000754	ENSXETG00000019523	ENSMUSG00000020806
ENSDARG00000040625	ENSORLG00000000756	ENSXETG00000002790	ENSMUSG00000030376
ENSDARG00000078924	ENSORLG00000000757	ENSXETG00000032317	ENSMUSG00000041143
ENSDARG00000042056	ENSORLG00000000760	ENSXETG00000013046	ENSMUSG00000031858
ENSDARG00000075468	ENSORLG00000000761	ENSXETG00000012958	ENSMUSG00000042116
ENSDARG00000032005	ENSORLG00000000762	ENSXETG00000009815	ENSMUSG00000003354
ENSDARG00000004150	ENSORLG00000000763	ENSXETG00000032539	ENSMUSG00000023192
ENSDARG00000025868	ENSORLG00000000765	ENSXETG00000004429	ENSMUSG00000030471
ENSDARG00000037421	ENSORLG00000000766	ENSXETG00000006697	ENSMUSG00000038418
ENSDARG00000013780	ENSORLG00000000767	ENSXETG00000025025	ENSMUSG00000003316
ENSDARG00000087939	ENSORLG00000000768	ENSXETG00000030069	ENSMUSG00000040813
ENSDARG00000003470	ENSORLG00000000770	ENSXETG00000014336	ENSMUSG00000002346
ENSDARG00000009782	ENSORLG00000000775	ENSXETG00000019650	ENSMUSG00000018830
ENSDARG00000088899	ENSORLG00000000780	ENSXETG00000021438	ENSMUSG00000027652
ENSDARG00000061233	ENSORLG00000000781	ENSXETG00000014295	ENSMUSG00000022822
ENSDARG00000028236	ENSORLG00000000783	ENSXETG00000003541	ENSMUSG00000079022
ENSDARG00000014727	ENSORLG00000000785	ENSXETG00000012601	ENSMUSG00000020777
ENSDARG00000057323	ENSORLG00000000786	ENSXETG00000004436	ENSMUSG00000046179
ENSDARG00000012790	ENSORLG00000000790	ENSXETG00000014335	ENSMUSG00000002342
ENSDARG00000056800	ENSORLG00000000794	ENSXETG00000031593	ENSMUSG00000056476
ENSDARG00000059729	ENSORLG00000000795	ENSXETG00000016146	ENSMUSG00000019368
ENSDARG00000016730	ENSORLG00000000796	ENSXETG00000013042	ENSMUSG00000036120
ENSDARG00000033370	ENSORLG00000000798	ENSXETG00000018176	ENSMUSG00000026035
ENSDARG00000009218	ENSORLG00000000799	ENSXETG00000018187	ENSMUSG00000046994
ENSDARG00000073688	ENSORLG00000000800	ENSXETG00000014194	ENSMUSG00000052512
ENSDARG00000074309	ENSORLG00000000803	ENSXETG00000001249	ENSMUSG00000037408
ENSDARG00000025346	ENSORLG00000000804	ENSXETG00000009253	ENSMUSG00000055917
ENSDARG00000052155	ENSORLG00000000805	ENSXETG00000012899	ENSMUSG00000007476
ENSDARG00000075793	ENSORLG00000000806	ENSXETG00000024001	ENSMUSG00000039621
ENSDARG00000001859	ENSORLG00000000807	ENSXETG00000014193	ENSMUSG00000030507
ENSDARG00000070261	ENSORLG00000000808	ENSXETG00000020053	ENSMUSG00000017561
ENSDARG00000040930	ENSORLG00000000810	ENSXETG00000005764	ENSMUSG00000022419
ENSDARG00000009160	ENSORLG00000000814	ENSXETG00000016227	ENSMUSG00000039783
ENSDARG00000019808	ENSORLG00000000815	ENSXETG00000012599	ENSMUSG00000034282
ENSDARG00000075416	ENSORLG00000000816	ENSXETG00000026948	ENSMUSG00000043510
ENSDARG00000002754	ENSORLG00000000817	ENSXETG00000020032	ENSMUSG00000002635
ENSDARG00000028386	ENSORLG00000000818	ENSXETG00000014192	ENSMUSG00000039745
ENSDARG00000018434	ENSORLG00000000824	ENSXETG00000008413	ENSMUSG00000037814
ENSDARG00000090965	ENSORLG00000000825	ENSXETG00000025849	ENSMUSG00000022221
ENSDARG00000074853	ENSORLG00000000826	ENSXETG00000009465	ENSMUSG00000001138
ENSDARG00000052775	ENSORLG00000000827	ENSXETG00000033066	ENSMUSG00000026525
ENSDARG00000019791	ENSORLG00000000829	ENSXETG00000014186	ENSMUSG00000030505
ENSDARG00000086512	ENSORLG00000000830	ENSXETG00000021664	ENSMUSG00000003526
ENSDARG00000077607	ENSORLG00000000833	ENSXETG00000005436	ENSMUSG00000031901
ENSDARG00000052783	ENSORLG00000000835	ENSXETG00000018487	ENSMUSG00000036533
ENSDARG00000068822	ENSORLG00000000837	ENSXETG00000001257	ENSMUSG00000094483
ENSDARG00000052022	ENSORLG00000000839	ENSXETG00000020055	ENSMUSG00000017548
ENSDARG00000004433	ENSORLG00000000842	ENSXETG00000018152	ENSMUSG00000031264
ENSDARG00000079757	ENSORLG00000000843	ENSXETG00000021660	ENSMUSG00000012017
ENSDARG00000058105	ENSORLG00000000845	ENSXETG00000018150	ENSMUSG00000079435
ENSDARG00000018542	ENSORLG00000000846	ENSXETG00000014330	ENSMUSG00000007594
ENSDARG00000045045	ENSORLG00000000847	ENSXETG00000008175	ENSMUSG00000029706
ENSDARG00000020820	ENSORLG00000000849	ENSXETG00000012631	ENSMUSG00000020780
ENSDARG00000053442	ENSORLG00000000850	ENSXETG00000007897	ENSMUSG00000015937
ENSDARG00000023927	ENSORLG00000000851	ENSXETG00000008179	ENSMUSG00000027166
ENSDARG00000068934	ENSORLG00000000853	ENSXETG00000025303	ENSMUSG00000024087
ENSDARG00000075307	ENSORLG00000000854	ENSXETG00000023036	ENSMUSG00000016346
ENSDARG00000060846	ENSORLG00000000855	ENSXETG00000016422	ENSMUSG00000009075
ENSDARG00000042785	ENSORLG00000000858	ENSXETG00000010401	ENSMUSG00000021506
ENSDARG00000036155	ENSORLG00000000859	ENSXETG00000018146	ENSMUSG00000031266
ENSDARG00000074933	ENSORLG00000000860	ENSXETG00000012579	ENSMUSG00000020718
ENSDARG00000075143	ENSORLG00000000861	ENSXETG00000024902	ENSMUSG00000043346
ENSDARG00000031981	ENSORLG00000000862	ENSXETG00000008191	ENSMUSG00000021496
ENSDARG00000076899	ENSORLG00000000864	ENSXETG00000015550	ENSMUSG00000036298
ENSDARG00000042517	ENSORLG00000000867	ENSXETG00000018967	ENSMUSG00000020477
ENSDARG00000043249	ENSORLG00000000868	ENSXETG00000010403	ENSMUSG00000021497
ENSDARG00000088560	ENSORLG00000000869	ENSXETG00000006842	ENSMUSG00000045980
ENSDARG00000006865	ENSORLG00000000871	ENSXETG00000011875	ENSMUSG00000018589
ENSDARG00000015880	ENSORLG00000000875	ENSXETG00000014171	ENSMUSG00000052026
ENSDARG00000006005	ENSORLG00000000883	ENSXETG00000018972	ENSMUSG00000053838
ENSDARG00000034344	ENSORLG00000000886	ENSXETG00000031488	ENSMUSG00000051323
ENSDARG00000029057	ENSORLG00000000887	ENSXETG00000025132	ENSMUSG00000036151
ENSDARG00000077469	ENSORLG00000000890	ENSXETG00000013749	ENSMUSG00000027395
ENSDARG00000005762	ENSORLG00000000896	ENSXETG00000005761	ENSMUSG00000022371
ENSDARG00000020204	ENSORLG00000000897	ENSXETG00000010090	ENSMUSG00000009073
ENSDARG00000004114	ENSORLG00000000898	ENSXETG00000017321	ENSMUSG00000027650
ENSDARG00000021065	ENSORLG00000000900	ENSXETG00000018971	ENSMUSG00000057897
ENSDARG00000043692	ENSORLG00000000901	ENSXETG00000017320	ENSMUSG00000037843
ENSDARG00000033551	ENSORLG00000000906	ENSXETG00000021190	ENSMUSG00000040913
ENSDARG00000074062	ENSORLG00000000908	ENSXETG00000027914	ENSMUSG00000096461
ENSDARG00000071059	ENSORLG00000000909	ENSXETG00000010888	ENSMUSG00000023952
ENSDARG00000045207	ENSORLG00000000912	ENSXETG00000010406	ENSMUSG00000021501
ENSDARG00000016188	ENSORLG00000000913	ENSXETG00000021579	ENSMUSG00000035673
ENSDARG00000076611	ENSORLG00000000914	ENSXETG00000033734	ENSMUSG00000032898
ENSDARG00000090326	ENSORLG00000000916	ENSXETG00000001025	ENSMUSG00000027223
ENSDARG00000077225	ENSORLG00000000917	ENSXETG00000003004	ENSMUSG00000046697
ENSDARG00000020759	ENSORLG00000000918	ENSXETG00000018893	ENSMUSG00000031103
ENSDARG00000003399	ENSORLG00000000919	ENSXETG00000014474	ENSMUSG00000025219
ENSDARG00000053439	ENSORLG00000000920	ENSXETG00000010407	ENSMUSG00000036391
ENSDARG00000061131	ENSORLG00000000921	ENSXETG00000017099	ENSMUSG00000041642
ENSDARG00000030839	ENSORLG00000000922	ENSXETG00000030230	ENSMUSG00000055826
ENSDARG00000029894	ENSORLG00000000924	ENSXETG00000021195	ENSMUSG00000005107
ENSDARG00000013393	ENSORLG00000000925	ENSXETG00000001541	ENSMUSG00000023979
ENSDARG00000044938	ENSORLG00000000926	ENSXETG00000003005	ENSMUSG00000025577
ENSDARG00000079089	ENSORLG00000000928	ENSXETG00000022351	ENSMUSG00000032867
ENSDARG00000079003	ENSORLG00000000929	ENSXETG00000001325	ENSMUSG00000048616
ENSDARG00000053444	ENSORLG00000000931	ENSXETG00000007437	ENSMUSG00000016308
ENSDARG00000068600	ENSORLG00000000932	ENSXETG00000026979	ENSMUSG00000020088
ENSDARG00000011958	ENSORLG00000000933	ENSXETG00000017319	ENSMUSG00000027649
ENSDARG00000003965	ENSORLG00000000935	ENSXETG00000030804	ENSMUSG00000068327
ENSDARG00000034522	ENSORLG00000000937	ENSXETG00000031363	ENSMUSG00000032549
ENSDARG00000055040	ENSORLG00000000938	ENSXETG00000007438	ENSMUSG00000044149
ENSDARG00000007219	ENSORLG00000000939	ENSXETG00000017933	ENSMUSG00000054808
ENSDARG00000053389	ENSORLG00000000940	ENSXETG00000010410	ENSMUSG00000020387
ENSDARG00000039390	ENSORLG00000000941	ENSXETG00000017922	ENSMUSG00000026154
ENSDARG00000079349	ENSORLG00000000945	ENSXETG00000021428	ENSMUSG00000027490
ENSDARG00000053395	ENSORLG00000000947	ENSXETG00000016090	ENSMUSG00000020392
ENSDARG00000091153	ENSORLG00000000952	ENSXETG00000001017	ENSMUSG00000049922
ENSDARG00000078315	ENSORLG00000000953	ENSXETG00000028044	ENSMUSG00000032840
ENSDARG00000079749	ENSORLG00000000956	ENSXETG00000021426	ENSMUSG00000059842
ENSDARG00000053404	ENSORLG00000000957	ENSXETG00000016092	ENSMUSG00000020349
ENSDARG00000029663	ENSORLG00000000960	ENSXETG00000014011	ENSMUSG00000024870
ENSDARG00000003151	ENSORLG00000000961	ENSXETG00000016095	ENSMUSG00000036309
ENSDARG00000040387	ENSORLG00000000962	ENSXETG00000004315	ENSMUSG00000003948
ENSDARG00000074752	ENSORLG00000000969	ENSXETG00000004316	ENSMUSG00000059824
ENSDARG00000075963	ENSORLG00000000970	ENSXETG00000017938	ENSMUSG00000054005
ENSDARG00000011609	ENSORLG00000000973	ENSXETG00000022803	ENSMUSG00000039275
ENSDARG00000086475	ENSORLG00000000977	ENSXETG00000033112	ENSMUSG00000053930
ENSDARG00000018985	ENSORLG00000000978	ENSXETG00000018449	ENSMUSG00000020424
ENSDARG00000034270	ENSORLG00000000979	ENSXETG00000005613	ENSMUSG00000020456
ENSDARG00000068289	ENSORLG00000000980	ENSXETG00000024723	ENSMUSG00000053565
ENSDARG00000003132	ENSORLG00000000982	ENSXETG00000007558	ENSMUSG00000010911
ENSDARG00000061896	ENSORLG00000000985	ENSXETG00000011817	ENSMUSG00000032548
ENSDARG00000057738	ENSORLG00000000987	ENSXETG00000008830	ENSMUSG00000025001
ENSDARG00000016739	ENSORLG00000000988	ENSXETG00000003847	ENSMUSG00000050587
ENSDARG00000013777	ENSORLG00000000990	ENSXETG00000018235	ENSMUSG00000040734
ENSDARG00000045132	ENSORLG00000000991	ENSXETG00000015952	ENSMUSG00000020402
ENSDARG00000014770	ENSORLG00000000994	ENSXETG00000005929	ENSMUSG00000032612
ENSDARG00000079602	ENSORLG00000000995	ENSXETG00000033589	ENSMUSG00000094219
ENSDARG00000061761	ENSORLG00000000996	ENSXETG00000018240	ENSMUSG00000052214
ENSDARG00000010721	ENSORLG00000000997	ENSXETG00000007443	ENSMUSG00000050379
ENSDARG00000079780	ENSORLG00000001002	ENSXETG00000018718	ENSMUSG00000040725
ENSDARG00000034773	ENSORLG00000001014	ENSXETG00000008336	ENSMUSG00000035024
ENSDARG00000055162	ENSORLG00000001019	ENSXETG00000019457	ENSMUSG00000071757
ENSDARG00000077830	ENSORLG00000001021	ENSXETG00000001740	ENSMUSG00000042992
ENSDARG00000007231	ENSORLG00000001023	ENSXETG00000011818	ENSMUSG00000032547
ENSDARG00000034060	ENSORLG00000001024	ENSXETG00000012596	ENSMUSG00000020549
ENSDARG00000040198	ENSORLG00000001025	ENSXETG00000015944	ENSMUSG00000034098
ENSDARG00000000489	ENSORLG00000001026	ENSXETG00000007440	ENSMUSG00000036572
ENSDARG00000011825	ENSORLG00000001027	ENSXETG00000007039	ENSMUSG00000021537
ENSDARG00000061796	ENSORLG00000001029	ENSXETG00000002821	ENSMUSG00000030589
ENSDARG00000019302	ENSORLG00000001030	ENSXETG00000007609	ENSMUSG00000008035
ENSDARG00000041791	ENSORLG00000001032	ENSXETG00000011744	ENSMUSG00000019888
ENSDARG00000020607	ENSORLG00000001033	ENSXETG00000005484	ENSMUSG00000030286
ENSDARG00000036329	ENSORLG00000001034	ENSXETG00000030004	ENSMUSG00000016427
ENSDARG00000008407	ENSORLG00000001035	ENSXETG00000032143	ENSMUSG00000067377
ENSDARG00000033450	ENSORLG00000001037	ENSXETG00000007439	ENSMUSG00000059395
ENSDARG00000044812	ENSORLG00000001038	ENSXETG00000022228	ENSMUSG00000027194
ENSDARG00000052690	ENSORLG00000001039	ENSXETG00000002108	ENSMUSG00000074794
ENSDARG00000071467	ENSORLG00000001040	ENSXETG00000004479	ENSMUSG00000048047
ENSDARG00000041802	ENSORLG00000001041	ENSXETG00000008400	ENSMUSG00000030788
ENSDARG00000088981	ENSORLG00000001043	ENSXETG00000000664	ENSMUSG00000050270
ENSDARG00000044433	ENSORLG00000001045	ENSXETG00000002855	ENSMUSG00000047793
ENSDARG00000028058	ENSORLG00000001046	ENSXETG00000007549	ENSMUSG00000027164
ENSDARG00000068910	ENSORLG00000001050	ENSXETG00000011979	ENSMUSG00000028978
ENSDARG00000061248	ENSORLG00000001052	ENSXETG00000006839	ENSMUSG00000030657
ENSDARG00000077400	ENSORLG00000001053	ENSXETG00000007303	ENSMUSG00000031060
ENSDARG00000073911	ENSORLG00000001054	ENSXETG00000004478	ENSMUSG00000036502
ENSDARG00000005482	ENSORLG00000001061	ENSXETG00000026511	ENSMUSG00000062232
ENSDARG00000076404	ENSORLG00000001062	ENSXETG00000013380	ENSMUSG00000021596
ENSDARG00000070721	ENSORLG00000001063	ENSXETG00000010658	ENSMUSG00000022479
ENSDARG00000091398	ENSORLG00000001066	ENSXETG00000017148	ENSMUSG00000058806
ENSDARG00000053262	ENSORLG00000001069	ENSXETG00000004477	ENSMUSG00000016327
ENSDARG00000035634	ENSORLG00000001071	ENSXETG00000022365	ENSMUSG00000029363
ENSDARG00000017425	ENSORLG00000001073	ENSXETG00000012154	ENSMUSG00000040860
ENSDARG00000054578	ENSORLG00000001074	ENSXETG00000002943	ENSMUSG00000030654
ENSDARG00000055240	ENSORLG00000001080	ENSXETG00000022078	ENSMUSG00000024066
ENSDARG00000036031	ENSORLG00000001081	ENSXETG00000030888	ENSMUSG00000072214
ENSDARG00000017294	ENSORLG00000001082	ENSXETG00000007317	ENSMUSG00000032562
ENSDARG00000041204	ENSORLG00000001083	ENSXETG00000004880	ENSMUSG00000008855
ENSDARG00000041060	ENSORLG00000001085	ENSXETG00000030764	ENSMUSG00000001123
ENSDARG00000043257	ENSORLG00000001087	ENSXETG00000023038	ENSMUSG00000001270
ENSDARG00000006687	ENSORLG00000001088	ENSXETG00000017150	ENSMUSG00000020086
ENSDARG00000057286	ENSORLG00000001090	ENSXETG00000024196	ENSMUSG00000031015
ENSDARG00000058605	ENSORLG00000001091	ENSXETG00000022373	ENSMUSG00000066894
ENSDARG00000076094	ENSORLG00000001097	ENSXETG00000012118	ENSMUSG00000026308
ENSDARG00000042069	ENSORLG00000001103	ENSXETG00000022375	ENSMUSG00000047104
ENSDARG00000009175	ENSORLG00000001105	ENSXETG00000020385	ENSMUSG00000024319
ENSDARG00000078211	ENSORLG00000001107	ENSXETG00000012130	ENSMUSG00000049515
ENSDARG00000068507	ENSORLG00000001108	ENSXETG00000004221	ENSMUSG00000029343
ENSDARG00000060510	ENSORLG00000001110	ENSXETG00000004474	ENSMUSG00000031095
ENSDARG00000030514	ENSORLG00000001111	ENSXETG00000001539	ENSMUSG00000020333
ENSDARG00000093864	ENSORLG00000001112	ENSXETG00000021169	ENSMUSG00000031016
ENSDARG00000020153	ENSORLG00000001113	ENSXETG00000020394	ENSMUSG00000064231
ENSDARG00000005356	ENSORLG00000001116	ENSXETG00000000052	ENSMUSG00000027298
ENSDARG00000004502	ENSORLG00000001117	ENSXETG00000005989	ENSMUSG00000037395
ENSDARG00000025972	ENSORLG00000001118	ENSXETG00000004472	ENSMUSG00000042814
ENSDARG00000027182	ENSORLG00000001119	ENSXETG00000018815	ENSMUSG00000026171
ENSDARG00000059798	ENSORLG00000001120	ENSXETG00000034068	ENSMUSG00000009545
ENSDARG00000036335	ENSORLG00000001122	ENSXETG00000025606	ENSMUSG00000094696
ENSDARG00000073813	ENSORLG00000001126	ENSXETG00000026777	ENSMUSG00000026307
ENSDARG00000010381	ENSORLG00000001127	ENSXETG00000026022	ENSMUSG00000024325
ENSDARG00000034165	ENSORLG00000001128	ENSXETG00000002132	ENSMUSG00000049556
ENSDARG00000007172	ENSORLG00000001129	ENSXETG00000018635	ENSMUSG00000031398
ENSDARG00000032768	ENSORLG00000001131	ENSXETG00000016586	ENSMUSG00000018899
ENSDARG00000013007	ENSORLG00000001133	ENSXETG00000030841	ENSMUSG00000024858
ENSDARG00000070916	ENSORLG00000001134	ENSXETG00000021184	ENSMUSG00000020657
ENSDARG00000027187	ENSORLG00000001137	ENSXETG00000001943	ENSMUSG00000030801
ENSDARG00000027016	ENSORLG00000001139	ENSXETG00000010019	ENSMUSG00000025224
ENSDARG00000087196	ENSORLG00000001140	ENSXETG00000004609	ENSMUSG00000074971
ENSDARG00000063345	ENSORLG00000001141	ENSXETG00000023010	ENSMUSG00000040713
ENSDARG00000004018	ENSORLG00000001143	ENSXETG00000004792	ENSMUSG00000056643
ENSDARG00000005335	ENSORLG00000001145	ENSXETG00000016584	ENSMUSG00000063652
ENSDARG00000086410	ENSORLG00000001146	ENSXETG00000005126	ENSMUSG00000062632
ENSDARG00000070069	ENSORLG00000001148	ENSXETG00000010022	ENSMUSG00000025229
ENSDARG00000078151	ENSORLG00000001149	ENSXETG00000031503	ENSMUSG00000003378
ENSDARG00000036135	ENSORLG00000001150	ENSXETG00000004606	ENSMUSG00000041660
ENSDARG00000073737	ENSORLG00000001154	ENSXETG00000022377	ENSMUSG00000066900
ENSDARG00000061272	ENSORLG00000001156	ENSXETG00000004787	ENSMUSG00000030089
ENSDARG00000076045	ENSORLG00000001157	ENSXETG00000001932	ENSMUSG00000031443
ENSDARG00000023236	ENSORLG00000001160	ENSXETG00000000225	ENSMUSG00000058248
ENSDARG00000040608	ENSORLG00000001164	ENSXETG00000033795	ENSMUSG00000074569
ENSDARG00000091127	ENSORLG00000001165	ENSXETG00000011549	ENSMUSG00000030087
ENSDARG00000061862	ENSORLG00000001168	ENSXETG00000009454	ENSMUSG00000000631
ENSDARG00000093321	ENSORLG00000001170	ENSXETG00000031518	ENSMUSG00000076500
ENSDARG00000070603	ENSORLG00000001174	ENSXETG00000014317	ENSMUSG00000025092
ENSDARG00000058365	ENSORLG00000001186	ENSXETG00000025255	ENSMUSG00000041548
ENSDARG00000061466	ENSORLG00000001189	ENSXETG00000017865	ENSMUSG00000052560
ENSDARG00000074928	ENSORLG00000001192	ENSXETG00000031886	ENSMUSG00000076514
ENSDARG00000041065	ENSORLG00000001193	ENSXETG00000008972	ENSMUSG00000004951
ENSDARG00000060541	ENSORLG00000001194	ENSXETG00000032071	ENSMUSG00000001173
ENSDARG00000076028	ENSORLG00000001195	ENSXETG00000004211	ENSMUSG00000058153
ENSDARG00000088581	ENSORLG00000001205	ENSXETG00000025492	ENSMUSG00000031444
ENSDARG00000078998	ENSORLG00000001208	ENSXETG00000017857	ENSMUSG00000042873
ENSDARG00000062573	ENSORLG00000001210	ENSXETG00000019942	ENSMUSG00000034177
ENSDARG00000076900	ENSORLG00000001211	ENSXETG00000025493	ENSMUSG00000031445
ENSDARG00000044636	ENSORLG00000001214	ENSXETG00000024650	ENSMUSG00000093904
ENSDARG00000035618	ENSORLG00000001215	ENSXETG00000012228	ENSMUSG00000041733
ENSDARG00000074076	ENSORLG00000001217	ENSXETG00000019680	ENSMUSG00000030751
ENSDARG00000000189	ENSORLG00000001218	ENSXETG00000005837	ENSMUSG00000038777
ENSDARG00000021720	ENSORLG00000001219	ENSXETG00000016183	ENSMUSG00000025650
ENSDARG00000022728	ENSORLG00000001221	ENSXETG00000023721	ENSMUSG00000033931
ENSDARG00000056590	ENSORLG00000001222	ENSXETG00000019675	ENSMUSG00000030669
ENSDARG00000012688	ENSORLG00000001224	ENSXETG00000025051	ENSMUSG00000093826
ENSDARG00000007173	ENSORLG00000001225	ENSXETG00000006517	ENSMUSG00000040703
ENSDARG00000075326	ENSORLG00000001227	ENSXETG00000017716	ENSMUSG00000021731
ENSDARG00000057484	ENSORLG00000001230	ENSXETG00000025271	ENSMUSG00000034120
ENSDARG00000013802	ENSORLG00000001231	ENSXETG00000001931	ENSMUSG00000038542
ENSDARG00000067690	ENSORLG00000001235	ENSXETG00000005083	ENSMUSG00000028470
ENSDARG00000021916	ENSORLG00000001236	ENSXETG00000008186	ENSMUSG00000006270
ENSDARG00000002771	ENSORLG00000001244	ENSXETG00000012098	ENSMUSG00000068323
ENSDARG00000004866	ENSORLG00000001245	ENSXETG00000008117	ENSMUSG00000038712
ENSDARG00000008310	ENSORLG00000001247	ENSXETG00000009324	ENSMUSG00000032599
ENSDARG00000026017	ENSORLG00000001251	ENSXETG00000007460	ENSMUSG00000037005
ENSDARG00000044634	ENSORLG00000001253	ENSXETG00000013067	ENSMUSG00000039233
ENSDARG00000004094	ENSORLG00000001254	ENSXETG00000033634	ENSMUSG00000024207
ENSDARG00000017329	ENSORLG00000001255	ENSXETG00000019709	ENSMUSG00000020389
ENSDARG00000091498	ENSORLG00000001256	ENSXETG00000032950	ENSMUSG00000020818
ENSDARG00000021669	ENSORLG00000001257	ENSXETG00000024743	ENSMUSG00000025816
ENSDARG00000015536	ENSORLG00000001260	ENSXETG00000016058	ENSMUSG00000051910
ENSDARG00000016541	ENSORLG00000001261	ENSXETG00000007461	ENSMUSG00000031101
ENSDARG00000068650	ENSORLG00000001263	ENSXETG00000014151	ENSMUSG00000036002
ENSDARG00000040111	ENSORLG00000001264	ENSXETG00000006823	ENSMUSG00000038861
ENSDARG00000022564	ENSORLG00000001266	ENSXETG00000016045	ENSMUSG00000030663
ENSDARG00000053665	ENSORLG00000001267	ENSXETG00000023224	ENSMUSG00000031340
ENSDARG00000076968	ENSORLG00000001268	ENSXETG00000025265	ENSMUSG00000050628
ENSDARG00000063258	ENSORLG00000001269	ENSXETG00000027541	ENSMUSG00000005774
ENSDARG00000060515	ENSORLG00000001271	ENSXETG00000007463	ENSMUSG00000036985
ENSDARG00000060675	ENSORLG00000001273	ENSXETG00000016220	ENSMUSG00000005397
ENSDARG00000035808	ENSORLG00000001275	ENSXETG00000015727	ENSMUSG00000000605
ENSDARG00000059545	ENSORLG00000001276	ENSXETG00000019549	ENSMUSG00000034227
ENSDARG00000062220	ENSORLG00000001278	ENSXETG00000022456	ENSMUSG00000045659
ENSDARG00000087111	ENSORLG00000001280	ENSXETG00000009641	ENSMUSG00000037085
ENSDARG00000021293	ENSORLG00000001282	ENSXETG00000020279	ENSMUSG00000036820
ENSDARG00000020952	ENSORLG00000001284	ENSXETG00000030740	ENSMUSG00000054999
ENSDARG00000070394	ENSORLG00000001285	ENSXETG00000011543	ENSMUSG00000034456
ENSDARG00000043170	ENSORLG00000001286	ENSXETG00000000307	ENSMUSG00000060601
ENSDARG00000010191	ENSORLG00000001287	ENSXETG00000015100	ENSMUSG00000024424
ENSDARG00000036298	ENSORLG00000001289	ENSXETG00000026454	ENSMUSG00000090862
ENSDARG00000001210	ENSORLG00000001290	ENSXETG00000025348	ENSMUSG00000027122
ENSDARG00000060841	ENSORLG00000001292	ENSXETG00000016008	ENSMUSG00000030660
ENSDARG00000078448	ENSORLG00000001294	ENSXETG00000016222	ENSMUSG00000021306
ENSDARG00000013269	ENSORLG00000001298	ENSXETG00000009775	ENSMUSG00000041831
ENSDARG00000089016	ENSORLG00000001299	ENSXETG00000000076	ENSMUSG00000032577
ENSDARG00000017211	ENSORLG00000001300	ENSXETG00000017823	ENSMUSG00000053646
ENSDARG00000034313	ENSORLG00000001301	ENSXETG00000018265	ENSMUSG00000003099
ENSDARG00000042697	ENSORLG00000001304	ENSXETG00000001195	ENSMUSG00000037936
ENSDARG00000038288	ENSORLG00000001305	ENSXETG00000019035	ENSMUSG00000025510
ENSDARG00000001993	ENSORLG00000001307	ENSXETG00000032275	ENSMUSG00000020908
ENSDARG00000036299	ENSORLG00000001308	ENSXETG00000016026	ENSMUSG00000030659
ENSDARG00000034559	ENSORLG00000001311	ENSXETG00000006728	ENSMUSG00000031253
ENSDARG00000010280	ENSORLG00000001312	ENSXETG00000000840	ENSMUSG00000064302
ENSDARG00000032606	ENSORLG00000001313	ENSXETG00000030617	ENSMUSG00000018398
ENSDARG00000041504	ENSORLG00000001315	ENSXETG00000007794	ENSMUSG00000070473
ENSDARG00000052223	ENSORLG00000001318	ENSXETG00000000137	ENSMUSG00000020907
ENSDARG00000021859	ENSORLG00000001321	ENSXETG00000013225	ENSMUSG00000021583
ENSDARG00000061024	ENSORLG00000001324	ENSXETG00000033717	ENSMUSG00000040472
ENSDARG00000025641	ENSORLG00000001328	ENSXETG00000011189	ENSMUSG00000048402
ENSDARG00000043128	ENSORLG00000001331	ENSXETG00000025329	ENSMUSG00000055811
ENSDARG00000029415	ENSORLG00000001332	ENSXETG00000001802	ENSMUSG00000027099
ENSDARG00000021046	ENSORLG00000001341	ENSXETG00000020088	ENSMUSG00000026142
ENSDARG00000054804	ENSORLG00000001344	ENSXETG00000015745	ENSMUSG00000015749
ENSDARG00000058508	ENSORLG00000001345	ENSXETG00000024528	ENSMUSG00000039543
ENSDARG00000059276	ENSORLG00000001346	ENSXETG00000001799	ENSMUSG00000042464
ENSDARG00000059274	ENSORLG00000001349	ENSXETG00000007581	ENSMUSG00000038227
ENSDARG00000017624	ENSORLG00000001350	ENSXETG00000017147	ENSMUSG00000023039
ENSDARG00000020497	ENSORLG00000001351	ENSXETG00000016176	ENSMUSG00000052688
ENSDARG00000077499	ENSORLG00000001352	ENSXETG00000015750	ENSMUSG00000015745
ENSDARG00000077912	ENSORLG00000001354	ENSXETG00000007610	ENSMUSG00000036959
ENSDARG00000040778	ENSORLG00000001355	ENSXETG00000034239	ENSMUSG00000004451
ENSDARG00000042418	ENSORLG00000001357	ENSXETG00000010109	ENSMUSG00000034040
ENSDARG00000012130	ENSORLG00000001358	ENSXETG00000014626	ENSMUSG00000022218
ENSDARG00000001857	ENSORLG00000001361	ENSXETG00000004169	ENSMUSG00000049470
ENSDARG00000005828	ENSORLG00000001364	ENSXETG00000007986	ENSMUSG00000032463
ENSDARG00000006639	ENSORLG00000001366	ENSXETG00000007570	ENSMUSG00000009207
ENSDARG00000059327	ENSORLG00000001368	ENSXETG00000016171	ENSMUSG00000015053
ENSDARG00000031618	ENSORLG00000001371	ENSXETG00000018197	ENSMUSG00000085272
ENSDARG00000091092	ENSORLG00000001372	ENSXETG00000004171	ENSMUSG00000018239
ENSDARG00000045814	ENSORLG00000001373	ENSXETG00000004871	ENSMUSG00000022437
ENSDARG00000062123	ENSORLG00000001374	ENSXETG00000003280	ENSMUSG00000055013
ENSDARG00000008490	ENSORLG00000001375	ENSXETG00000009783	ENSMUSG00000019814
ENSDARG00000002933	ENSORLG00000001376	ENSXETG00000003290	ENSMUSG00000034486
ENSDARG00000004696	ENSORLG00000001377	ENSXETG00000002066	ENSMUSG00000033216
ENSDARG00000009021	ENSORLG00000001379	ENSXETG00000025420	ENSMUSG00000027107
ENSDARG00000090788	ENSORLG00000001380	ENSXETG00000009642	ENSMUSG00000031256
ENSDARG00000039384	ENSORLG00000001381	ENSXETG00000003718	ENSMUSG00000062234
ENSDARG00000021442	ENSORLG00000001383	ENSXETG00000020467	ENSMUSG00000059674
ENSDARG00000043135	ENSORLG00000001386	ENSXETG00000017532	ENSMUSG00000020660
ENSDARG00000060392	ENSORLG00000001389	ENSXETG00000009007	ENSMUSG00000031575
ENSDARG00000061180	ENSORLG00000001390	ENSXETG00000015753	ENSMUSG00000015747
ENSDARG00000058358	ENSORLG00000001392	ENSXETG00000020454	ENSMUSG00000037185
ENSDARG00000062987	ENSORLG00000001393	ENSXETG00000010094	ENSMUSG00000056310
ENSDARG00000002591	ENSORLG00000001398	ENSXETG00000002064	ENSMUSG00000079076
ENSDARG00000089106	ENSORLG00000001399	ENSXETG00000008820	ENSMUSG00000024740
ENSDARG00000091726	ENSORLG00000001403	ENSXETG00000032698	ENSMUSG00000020473
ENSDARG00000027803	ENSORLG00000001404	ENSXETG00000010093	ENSMUSG00000025337
ENSDARG00000070062	ENSORLG00000001406	ENSXETG00000009648	ENSMUSG00000031257
ENSDARG00000060398	ENSORLG00000001407	ENSXETG00000031244	ENSMUSG00000052395
ENSDARG00000074326	ENSORLG00000001413	ENSXETG00000004500	ENSMUSG00000027353
ENSDARG00000043288	ENSORLG00000001414	ENSXETG00000015258	ENSMUSG00000024423
ENSDARG00000014477	ENSORLG00000001415	ENSXETG00000005731	ENSMUSG00000044933
ENSDARG00000044011	ENSORLG00000001416	ENSXETG00000009649	ENSMUSG00000031258
ENSDARG00000068199	ENSORLG00000001418	ENSXETG00000016961	ENSMUSG00000003363
ENSDARG00000038000	ENSORLG00000001420	ENSXETG00000026037	ENSMUSG00000027357
ENSDARG00000015709	ENSORLG00000001421	ENSXETG00000022229	ENSMUSG00000027195
ENSDARG00000025953	ENSORLG00000001422	ENSXETG00000022733	ENSMUSG00000024143
ENSDARG00000004297	ENSORLG00000001424	ENSXETG00000011067	ENSMUSG00000034168
ENSDARG00000062745	ENSORLG00000001426	ENSXETG00000022744	ENSMUSG00000037104
ENSDARG00000039757	ENSORLG00000001432	ENSXETG00000022745	ENSMUSG00000024150
ENSDARG00000079479	ENSORLG00000001433	ENSXETG00000033142	ENSMUSG00000044317
ENSDARG00000020913	ENSORLG00000001434	ENSXETG00000019000	ENSMUSG00000004393
ENSDARG00000012256	ENSORLG00000001435	ENSXETG00000001671	ENSMUSG00000025503
ENSDARG00000069318	ENSORLG00000001436	ENSXETG00000017509	ENSMUSG00000020658
ENSDARG00000045606	ENSORLG00000001437	ENSXETG00000022230	ENSMUSG00000040174
ENSDARG00000092650	ENSORLG00000001440	ENSXETG00000020598	ENSMUSG00000039661
ENSDARG00000012468	ENSORLG00000001447	ENSXETG00000001210	ENSMUSG00000029482
ENSDARG00000052565	ENSORLG00000001450	ENSXETG00000009626	ENSMUSG00000031262
ENSDARG00000016598	ENSORLG00000001451	ENSXETG00000027612	ENSMUSG00000000308
ENSDARG00000074057	ENSORLG00000001452	ENSXETG00000000321	ENSMUSG00000019370
ENSDARG00000070653	ENSORLG00000001453	ENSXETG00000004819	ENSMUSG00000034037
ENSDARG00000058525	ENSORLG00000001455	ENSXETG00000013923	ENSMUSG00000022837
ENSDARG00000043905	ENSORLG00000001462	ENSXETG00000027144	ENSMUSG00000060450
ENSDARG00000008808	ENSORLG00000001463	ENSXETG00000018242	ENSMUSG00000040811
ENSDARG00000079812	ENSORLG00000001464	ENSXETG00000018991	ENSMUSG00000041164
ENSDARG00000011281	ENSORLG00000001466	ENSXETG00000015091	ENSMUSG00000044252
ENSDARG00000040534	ENSORLG00000001469	ENSXETG00000030590	ENSMUSG00000051397
ENSDARG00000003599	ENSORLG00000001470	ENSXETG00000006914	ENSMUSG00000060036
ENSDARG00000079973	ENSORLG00000001472	ENSXETG00000002210	ENSMUSG00000020280
ENSDARG00000007354	ENSORLG00000001475	ENSXETG00000004650	ENSMUSG00000027248
ENSDARG00000023858	ENSORLG00000001476	ENSXETG00000004821	ENSMUSG00000034083
ENSDARG00000022132	ENSORLG00000001478	ENSXETG00000018175	ENSMUSG00000000223
ENSDARG00000019426	ENSORLG00000001484	ENSXETG00000013968	ENSMUSG00000022263
ENSDARG00000045928	ENSORLG00000001486	ENSXETG00000008877	ENSMUSG00000032301
ENSDARG00000045808	ENSORLG00000001487	ENSXETG00000017770	ENSMUSG00000039194
ENSDARG00000070617	ENSORLG00000001489	ENSXETG00000001448	ENSMUSG00000033933
ENSDARG00000068732	ENSORLG00000001490	ENSXETG00000019568	ENSMUSG00000024427
ENSDARG00000079578	ENSORLG00000001493	ENSXETG00000011290	ENSMUSG00000031586
ENSDARG00000037229	ENSORLG00000001495	ENSXETG00000005791	ENSMUSG00000023106
ENSDARG00000057159	ENSORLG00000001496	ENSXETG00000032070	ENSMUSG00000057766
ENSDARG00000025797	ENSORLG00000001498	ENSXETG00000017771	ENSMUSG00000039202
ENSDARG00000017542	ENSORLG00000001499	ENSXETG00000019566	ENSMUSG00000037225
ENSDARG00000007449	ENSORLG00000001500	ENSXETG00000011613	ENSMUSG00000018677
ENSDARG00000016811	ENSORLG00000001502	ENSXETG00000014292	ENSMUSG00000027933
ENSDARG00000018110	ENSORLG00000001503	ENSXETG00000005314	ENSMUSG00000030602
ENSDARG00000018882	ENSORLG00000001504	ENSXETG00000000586	ENSMUSG00000024789
ENSDARG00000076292	ENSORLG00000001505	ENSXETG00000001823	ENSMUSG00000037003
ENSDARG00000008454	ENSORLG00000001508	ENSXETG00000010660	ENSMUSG00000025586
ENSDARG00000054250	ENSORLG00000001509	ENSXETG00000005146	ENSMUSG00000005362
ENSDARG00000013475	ENSORLG00000001511	ENSXETG00000002227	ENSMUSG00000007739
ENSDARG00000069175	ENSORLG00000001517	ENSXETG00000000638	ENSMUSG00000031913
ENSDARG00000061067	ENSORLG00000001519	ENSXETG00000010657	ENSMUSG00000052369
ENSDARG00000005867	ENSORLG00000001521	ENSXETG00000021434	ENSMUSG00000054199
ENSDARG00000019572	ENSORLG00000001523	ENSXETG00000018171	ENSMUSG00000051316
ENSDARG00000089742	ENSORLG00000001528	ENSXETG00000002233	ENSMUSG00000049811
ENSDARG00000045803	ENSORLG00000001529	ENSXETG00000017772	ENSMUSG00000030605
ENSDARG00000036998	ENSORLG00000001531	ENSXETG00000011174	ENSMUSG00000051853
ENSDARG00000025233	ENSORLG00000001533	ENSXETG00000019393	ENSMUSG00000037216
ENSDARG00000037000	ENSORLG00000001534	ENSXETG00000009816	ENSMUSG00000003355
ENSDARG00000060569	ENSORLG00000001535	ENSXETG00000003909	ENSMUSG00000046157
ENSDARG00000033872	ENSORLG00000001536	ENSXETG00000010650	ENSMUSG00000032384
ENSDARG00000013928	ENSORLG00000001537	ENSXETG00000026788	ENSMUSG00000030701
ENSDARG00000010487	ENSORLG00000001538	ENSXETG00000000161	ENSMUSG00000052833
ENSDARG00000015128	ENSORLG00000001539	ENSXETG00000013647	ENSMUSG00000073640
ENSDARG00000045802	ENSORLG00000001540	ENSXETG00000007569	ENSMUSG00000030606
ENSDARG00000074393	ENSORLG00000001545	ENSXETG00000016765	ENSMUSG00000020669
ENSDARG00000022413	ENSORLG00000001546	ENSXETG00000002976	ENSMUSG00000026283
ENSDARG00000008237	ENSORLG00000001547	ENSXETG00000008009	ENSMUSG00000068739
ENSDARG00000009209	ENSORLG00000001549	ENSXETG00000019761	ENSMUSG00000031129
ENSDARG00000059175	ENSORLG00000001550	ENSXETG00000016761	ENSMUSG00000035790
ENSDARG00000078326	ENSORLG00000001552	ENSXETG00000001880	ENSMUSG00000036452
ENSDARG00000090494	ENSORLG00000001553	ENSXETG00000032256	ENSMUSG00000029392
ENSDARG00000029242	ENSORLG00000001554	ENSXETG00000003785	ENSMUSG00000027180
ENSDARG00000037068	ENSORLG00000001555	ENSXETG00000009449	ENSMUSG00000002578
ENSDARG00000035120	ENSORLG00000001556	ENSXETG00000000543	ENSMUSG00000024827
ENSDARG00000068319	ENSORLG00000001558	ENSXETG00000005820	ENSMUSG00000049327
ENSDARG00000063229	ENSORLG00000001559	ENSXETG00000002224	ENSMUSG00000020290
ENSDARG00000059510	ENSORLG00000001561	ENSXETG00000017968	ENSMUSG00000029319
ENSDARG00000018476	ENSORLG00000001562	ENSXETG00000011808	ENSMUSG00000022781
ENSDARG00000071498	ENSORLG00000001563	ENSXETG00000019760	ENSMUSG00000050035
ENSDARG00000025032	ENSORLG00000001565	ENSXETG00000001879	ENSMUSG00000024431
ENSDARG00000039162	ENSORLG00000001566	ENSXETG00000009724	ENSMUSG00000028945
ENSDARG00000071031	ENSORLG00000001567	ENSXETG00000010653	ENSMUSG00000032382
ENSDARG00000043404	ENSORLG00000001568	ENSXETG00000026230	ENSMUSG00000024446
ENSDARG00000021985	ENSORLG00000001570	ENSXETG00000018229	ENSMUSG00000030400
ENSDARG00000063381	ENSORLG00000001571	ENSXETG00000005759	ENSMUSG00000060206
ENSDARG00000043279	ENSORLG00000001572	ENSXETG00000033558	ENSMUSG00000045091
ENSDARG00000054849	ENSORLG00000001573	ENSXETG00000025501	ENSMUSG00000030268
ENSDARG00000011973	ENSORLG00000001574	ENSXETG00000012400	ENSMUSG00000028521
ENSDARG00000007279	ENSORLG00000001576	ENSXETG00000005469	ENSMUSG00000024487
ENSDARG00000012141	ENSORLG00000001577	ENSXETG00000002208	ENSMUSG00000020273
ENSDARG00000024895	ENSORLG00000001578	ENSXETG00000003375	ENSMUSG00000038246
ENSDARG00000054842	ENSORLG00000001583	ENSXETG00000004573	ENSMUSG00000030825
ENSDARG00000086786	ENSORLG00000001585	ENSXETG00000008016	ENSMUSG00000001082
ENSDARG00000055276	ENSORLG00000001586	ENSXETG00000002209	ENSMUSG00000020275
ENSDARG00000091755	ENSORLG00000001587	ENSXETG00000008488	ENSMUSG00000038077
ENSDARG00000053692	ENSORLG00000001588	ENSXETG00000032005	ENSMUSG00000073574
ENSDARG00000069031	ENSORLG00000001590	ENSXETG00000032177	ENSMUSG00000059455
ENSDARG00000086829	ENSORLG00000001592	ENSXETG00000027329	ENSMUSG00000053600
ENSDARG00000013250	ENSORLG00000001594	ENSXETG00000020313	ENSMUSG00000030515
ENSDARG00000008937	ENSORLG00000001596	ENSXETG00000005195	ENSMUSG00000060534
ENSDARG00000071037	ENSORLG00000001597	ENSXETG00000002212	ENSMUSG00000020283
ENSDARG00000009563	ENSORLG00000001599	ENSXETG00000007555	ENSMUSG00000005089
ENSDARG00000016173	ENSORLG00000001600	ENSXETG00000007748	ENSMUSG00000001416
ENSDARG00000013236	ENSORLG00000001602	ENSXETG00000020010	ENSMUSG00000034926
ENSDARG00000003818	ENSORLG00000001606	ENSXETG00000011175	ENSMUSG00000067713
ENSDARG00000069700	ENSORLG00000001607	ENSXETG00000017437	ENSMUSG00000024856
ENSDARG00000019503	ENSORLG00000001613	ENSXETG00000021723	ENSMUSG00000032565
ENSDARG00000059354	ENSORLG00000001614	ENSXETG00000034121	ENSMUSG00000001418
ENSDARG00000077485	ENSORLG00000001615	ENSXETG00000007273	ENSMUSG00000071291
ENSDARG00000077352	ENSORLG00000001618	ENSXETG00000033376	ENSMUSG00000006731
ENSDARG00000063522	ENSORLG00000001619	ENSXETG00000005200	ENSMUSG00000025235
ENSDARG00000077732	ENSORLG00000001620	ENSXETG00000005391	ENSMUSG00000025134
ENSDARG00000075126	ENSORLG00000001621	ENSXETG00000009858	ENSMUSG00000078716
ENSDARG00000019280	ENSORLG00000001622	ENSXETG00000002320	ENSMUSG00000024493
ENSDARG00000022895	ENSORLG00000001623	ENSXETG00000018322	ENSMUSG00000031139
ENSDARG00000040255	ENSORLG00000001624	ENSXETG00000017581	ENSMUSG00000022040
ENSDARG00000074185	ENSORLG00000001627	ENSXETG00000020012	ENSMUSG00000044254
ENSDARG00000019961	ENSORLG00000001628	ENSXETG00000031268	ENSMUSG00000043059
ENSDARG00000043795	ENSORLG00000001629	ENSXETG00000030289	ENSMUSG00000025132
ENSDARG00000076927	ENSORLG00000001631	ENSXETG00000013911	ENSMUSG00000026564
ENSDARG00000037706	ENSORLG00000001633	ENSXETG00000007470	ENSMUSG00000027610
ENSDARG00000035056	ENSORLG00000001634	ENSXETG00000003477	ENSMUSG00000031137
ENSDARG00000019622	ENSORLG00000001636	ENSXETG00000004073	ENSMUSG00000037386
ENSDARG00000017571	ENSORLG00000001637	ENSXETG00000018213	ENSMUSG00000021646
ENSDARG00000055255	ENSORLG00000001638	ENSXETG00000020679	ENSMUSG00000024851
ENSDARG00000020301	ENSORLG00000001640	ENSXETG00000006216	ENSMUSG00000040462
ENSDARG00000055561	ENSORLG00000001643	ENSXETG00000007295	ENSMUSG00000042460
ENSDARG00000077053	ENSORLG00000001644	ENSXETG00000000265	ENSMUSG00000003863
ENSDARG00000060521	ENSORLG00000001645	ENSXETG00000002322	ENSMUSG00000024491
ENSDARG00000059674	ENSORLG00000001647	ENSXETG00000022617	ENSMUSG00000022305
ENSDARG00000069681	ENSORLG00000001649	ENSXETG00000009480	ENSMUSG00000025050
ENSDARG00000056615	ENSORLG00000001650	ENSXETG00000018630	ENSMUSG00000023802
ENSDARG00000031647	ENSORLG00000001651	ENSXETG00000021830	ENSMUSG00000040033
ENSDARG00000059120	ENSORLG00000001653	ENSXETG00000009354	ENSMUSG00000031155
ENSDARG00000071497	ENSORLG00000001654	ENSXETG00000024458	ENSMUSG00000067860
ENSDARG00000006206	ENSORLG00000001657	ENSXETG00000032363	ENSMUSG00000024497
ENSDARG00000039218	ENSORLG00000001659	ENSXETG00000003478	ENSMUSG00000036357
ENSDARG00000058944	ENSORLG00000001660	ENSXETG00000016923	ENSMUSG00000030433
ENSDARG00000035954	ENSORLG00000001661	ENSXETG00000014826	ENSMUSG00000035958
ENSDARG00000069006	ENSORLG00000001664	ENSXETG00000013999	ENSMUSG00000032280
ENSDARG00000015662	ENSORLG00000001665	ENSXETG00000006155	ENSMUSG00000009646
ENSDARG00000076729	ENSORLG00000001677	ENSXETG00000005211	ENSMUSG00000039585
ENSDARG00000038917	ENSORLG00000001678	ENSXETG00000006986	ENSMUSG00000020380
ENSDARG00000042114	ENSORLG00000001680	ENSXETG00000000473	ENSMUSG00000024381
ENSDARG00000038918	ENSORLG00000001681	ENSXETG00000013921	ENSMUSG00000021478
ENSDARG00000019595	ENSORLG00000001684	ENSXETG00000005208	ENSMUSG00000051705
ENSDARG00000004132	ENSORLG00000001685	ENSXETG00000008619	ENSMUSG00000006676
ENSDARG00000006982	ENSORLG00000001686	ENSXETG00000009168	ENSMUSG00000021469
ENSDARG00000016733	ENSORLG00000001687	ENSXETG00000003623	ENSMUSG00000024640
ENSDARG00000053956	ENSORLG00000001689	ENSXETG00000015170	ENSMUSG00000074899
ENSDARG00000002728	ENSORLG00000001694	ENSXETG00000021618	ENSMUSG00000035773
ENSDARG00000007885	ENSORLG00000001695	ENSXETG00000020481	ENSMUSG00000004018
ENSDARG00000043571	ENSORLG00000001697	ENSXETG00000013598	ENSMUSG00000028678
ENSDARG00000052589	ENSORLG00000001698	ENSXETG00000005405	ENSMUSG00000030219
ENSDARG00000022599	ENSORLG00000001701	ENSXETG00000019276	ENSMUSG00000026209
ENSDARG00000051956	ENSORLG00000001702	ENSXETG00000030839	ENSMUSG00000044792
ENSDARG00000061352	ENSORLG00000001704	ENSXETG00000002206	ENSMUSG00000000861
ENSDARG00000058646	ENSORLG00000001705	ENSXETG00000019283	ENSMUSG00000026204
ENSDARG00000092798	ENSORLG00000001706	ENSXETG00000010651	ENSMUSG00000032383
ENSDARG00000086918	ENSORLG00000001707	ENSXETG00000012605	ENSMUSG00000020717
ENSDARG00000070553	ENSORLG00000001708	ENSXETG00000014707	ENSMUSG00000009535
ENSDARG00000005033	ENSORLG00000001710	ENSXETG00000010649	ENSMUSG00000032386
ENSDARG00000056691	ENSORLG00000001711	ENSXETG00000012731	ENSMUSG00000020300
ENSDARG00000033854	ENSORLG00000001712	ENSXETG00000006498	ENSMUSG00000042895
ENSDARG00000063525	ENSORLG00000001716	ENSXETG00000022910	ENSMUSG00000025236
ENSDARG00000059933	ENSORLG00000001717	ENSXETG00000011144	ENSMUSG00000028517
ENSDARG00000075906	ENSORLG00000001719	ENSXETG00000030929	ENSMUSG00000024266
ENSDARG00000077584	ENSORLG00000001720	ENSXETG00000029932	ENSMUSG00000032245
ENSDARG00000042310	ENSORLG00000001721	ENSXETG00000016957	ENSMUSG00000040466
ENSDARG00000075690	ENSORLG00000001723	ENSXETG00000021528	ENSMUSG00000068290
ENSDARG00000007383	ENSORLG00000001728	ENSXETG00000000152	ENSMUSG00000046410
ENSDARG00000075800	ENSORLG00000001729	ENSXETG00000007814	ENSMUSG00000032246
ENSDARG00000044400	ENSORLG00000001731	ENSXETG00000020368	ENSMUSG00000035126
ENSDARG00000029459	ENSORLG00000001732	ENSXETG00000020788	ENSMUSG00000038622
ENSDARG00000059879	ENSORLG00000001734	ENSXETG00000013410	ENSMUSG00000025583
ENSDARG00000054833	ENSORLG00000001739	ENSXETG00000021229	ENSMUSG00000030824
ENSDARG00000060641	ENSORLG00000001742	ENSXETG00000011138	ENSMUSG00000028518
ENSDARG00000067549	ENSORLG00000001743	ENSXETG00000009863	ENSMUSG00000032363
ENSDARG00000004909	ENSORLG00000001746	ENSXETG00000007561	ENSMUSG00000027187
ENSDARG00000075354	ENSORLG00000001751	ENSXETG00000012668	ENSMUSG00000058290
ENSDARG00000062111	ENSORLG00000001754	ENSXETG00000001632	ENSMUSG00000049741
ENSDARG00000074671	ENSORLG00000001756	ENSXETG00000019618	ENSMUSG00000025582
ENSDARG00000095002	ENSORLG00000001761	ENSXETG00000014877	ENSMUSG00000017300
ENSDARG00000063135	ENSORLG00000001762	ENSXETG00000032938	ENSMUSG00000049303
ENSDARG00000017246	ENSORLG00000001764	ENSXETG00000002431	ENSMUSG00000053198
ENSDARG00000057629	ENSORLG00000001769	ENSXETG00000027945	ENSMUSG00000022315
ENSDARG00000074166	ENSORLG00000001771	ENSXETG00000017697	ENSMUSG00000024073
ENSDARG00000079756	ENSORLG00000001774	ENSXETG00000015268	ENSMUSG00000074305
ENSDARG00000053569	ENSORLG00000001780	ENSXETG00000007607	ENSMUSG00000045179
ENSDARG00000035043	ENSORLG00000001781	ENSXETG00000012667	ENSMUSG00000001289
ENSDARG00000030957	ENSORLG00000001782	ENSXETG00000026583	ENSMUSG00000024072
ENSDARG00000028249	ENSORLG00000001784	ENSXETG00000020781	ENSMUSG00000022313
ENSDARG00000053570	ENSORLG00000001785	ENSXETG00000010723	ENSMUSG00000032860
ENSDARG00000059939	ENSORLG00000001786	ENSXETG00000011130	ENSMUSG00000028519
ENSDARG00000069745	ENSORLG00000001787	ENSXETG00000014482	ENSMUSG00000042195
ENSDARG00000039579	ENSORLG00000001790	ENSXETG00000021646	ENSMUSG00000020323
ENSDARG00000056832	ENSORLG00000001791	ENSXETG00000019032	ENSMUSG00000039748
ENSDARG00000031198	ENSORLG00000001794	ENSXETG00000015269	ENSMUSG00000032329
ENSDARG00000036086	ENSORLG00000001800	ENSXETG00000007816	ENSMUSG00000032243
ENSDARG00000070834	ENSORLG00000001804	ENSXETG00000020838	ENSMUSG00000048100
ENSDARG00000032997	ENSORLG00000001805	ENSXETG00000027728	ENSMUSG00000020448
ENSDARG00000001442	ENSORLG00000001806	ENSXETG00000032442	ENSMUSG00000032737
ENSDARG00000062289	ENSORLG00000001807	ENSXETG00000032415	ENSMUSG00000095105
ENSDARG00000019301	ENSORLG00000001808	ENSXETG00000009129	ENSMUSG00000020823
ENSDARG00000042615	ENSORLG00000001811	ENSXETG00000010442	ENSMUSG00000025439
ENSDARG00000088699	ENSORLG00000001816	ENSXETG00000031484	ENSMUSG00000074746
ENSDARG00000034693	ENSORLG00000001817	ENSXETG00000011126	ENSMUSG00000062627
ENSDARG00000078227	ENSORLG00000001819	ENSXETG00000015273	ENSMUSG00000032911
ENSDARG00000089933	ENSORLG00000001820	ENSXETG00000013023	ENSMUSG00000052142
ENSDARG00000015865	ENSORLG00000001822	ENSXETG00000015940	ENSMUSG00000000275
ENSDARG00000005927	ENSORLG00000001823	ENSXETG00000033187	ENSMUSG00000038520
ENSDARG00000014954	ENSORLG00000001824	ENSXETG00000015279	ENSMUSG00000032733
ENSDARG00000015422	ENSORLG00000001827	ENSXETG00000017097	ENSMUSG00000024007
ENSDARG00000060796	ENSORLG00000001828	ENSXETG00000009532	ENSMUSG00000037656
ENSDARG00000059246	ENSORLG00000001833	ENSXETG00000012569	ENSMUSG00000000568
ENSDARG00000008395	ENSORLG00000001836	ENSXETG00000015280	ENSMUSG00000055334
ENSDARG00000015110	ENSORLG00000001837	ENSXETG00000016493	ENSMUSG00000025094
ENSDARG00000008765	ENSORLG00000001838	ENSXETG00000001321	ENSMUSG00000063406
ENSDARG00000059735	ENSORLG00000001839	ENSXETG00000001324	ENSMUSG00000000276
ENSDARG00000067656	ENSORLG00000001840	ENSXETG00000009533	ENSMUSG00000055239
ENSDARG00000054793	ENSORLG00000001842	ENSXETG00000024985	ENSMUSG00000008140
ENSDARG00000020645	ENSORLG00000001843	ENSXETG00000005526	ENSMUSG00000031297
ENSDARG00000057049	ENSORLG00000001845	ENSXETG00000004192	ENSMUSG00000040901
ENSDARG00000026198	ENSORLG00000001846	ENSXETG00000012582	ENSMUSG00000029326
ENSDARG00000079440	ENSORLG00000001847	ENSXETG00000025308	ENSMUSG00000041729
ENSDARG00000077495	ENSORLG00000001849	ENSXETG00000015282	ENSMUSG00000032290
ENSDARG00000070329	ENSORLG00000001853	ENSXETG00000012826	ENSMUSG00000025578
ENSDARG00000009113	ENSORLG00000001858	ENSXETG00000000535	ENSMUSG00000026698
ENSDARG00000042624	ENSORLG00000001860	ENSXETG00000010703	ENSMUSG00000031284
ENSDARG00000003865	ENSORLG00000001861	ENSXETG00000012298	ENSMUSG00000044641
ENSDARG00000031044	ENSORLG00000001863	ENSXETG00000022391	ENSMUSG00000053846
ENSDARG00000074293	ENSORLG00000001864	ENSXETG00000012300	ENSMUSG00000051149
ENSDARG00000070807	ENSORLG00000001865	ENSXETG00000012825	ENSMUSG00000039989
ENSDARG00000053194	ENSORLG00000001867	ENSXETG00000009628	ENSMUSG00000015668
ENSDARG00000013015	ENSORLG00000001868	ENSXETG00000021831	ENSMUSG00000026774
ENSDARG00000045331	ENSORLG00000001869	ENSXETG00000010376	ENSMUSG00000026991
ENSDARG00000006487	ENSORLG00000001871	ENSXETG00000007821	ENSMUSG00000032249
ENSDARG00000079716	ENSORLG00000001872	ENSXETG00000015283	ENSMUSG00000042557
ENSDARG00000037183	ENSORLG00000001873	ENSXETG00000018685	ENSMUSG00000032265
ENSDARG00000078196	ENSORLG00000001876	ENSXETG00000010704	ENSMUSG00000019359
ENSDARG00000067713	ENSORLG00000001877	ENSXETG00000023376	ENSMUSG00000042364
ENSDARG00000057995	ENSORLG00000001879	ENSXETG00000023378	ENSMUSG00000042348
ENSDARG00000057011	ENSORLG00000001880	ENSXETG00000012303	ENSMUSG00000078919
ENSDARG00000019185	ENSORLG00000001882	ENSXETG00000011273	ENSMUSG00000055717
ENSDARG00000068981	ENSORLG00000001883	ENSXETG00000007825	ENSMUSG00000032252
ENSDARG00000095701	ENSORLG00000001884	ENSXETG00000019652	ENSMUSG00000013483
ENSDARG00000044601	ENSORLG00000001886	ENSXETG00000004521	ENSMUSG00000024758
ENSDARG00000030157	ENSORLG00000001887	ENSXETG00000003393	ENSMUSG00000038670
ENSDARG00000052846	ENSORLG00000001892	ENSXETG00000023385	ENSMUSG00000021765
ENSDARG00000010905	ENSORLG00000001893	ENSXETG00000010438	ENSMUSG00000026694
ENSDARG00000033121	ENSORLG00000001895	ENSXETG00000030218	ENSMUSG00000032892
ENSDARG00000061505	ENSORLG00000001896	ENSXETG00000002583	ENSMUSG00000060679
ENSDARG00000016813	ENSORLG00000001899	ENSXETG00000004201	ENSMUSG00000039963
ENSDARG00000043510	ENSORLG00000001902	ENSXETG00000010444	ENSMUSG00000026696
ENSDARG00000007755	ENSORLG00000001904	ENSXETG00000009511	ENSMUSG00000061559
ENSDARG00000063194	ENSORLG00000001906	ENSXETG00000000369	ENSMUSG00000024905
ENSDARG00000001882	ENSORLG00000001908	ENSXETG00000031782	ENSMUSG00000033182
ENSDARG00000021789	ENSORLG00000001910	ENSXETG00000010446	ENSMUSG00000026697
ENSDARG00000045927	ENSORLG00000001911	ENSXETG00000002608	ENSMUSG00000050144
ENSDARG00000076796	ENSORLG00000001913	ENSXETG00000033070	ENSMUSG00000000881
ENSDARG00000076328	ENSORLG00000001914	ENSXETG00000023393	ENSMUSG00000022807
ENSDARG00000077703	ENSORLG00000001915	ENSXETG00000010928	ENSMUSG00000013787
ENSDARG00000078186	ENSORLG00000001916	ENSXETG00000030925	ENSMUSG00000040548
ENSDARG00000057583	ENSORLG00000001919	ENSXETG00000010448	ENSMUSG00000039262
ENSDARG00000038005	ENSORLG00000001922	ENSXETG00000000296	ENSMUSG00000038502
ENSDARG00000074424	ENSORLG00000001923	ENSXETG00000018679	ENSMUSG00000035941
ENSDARG00000043732	ENSORLG00000001924	ENSXETG00000030947	ENSMUSG00000035297
ENSDARG00000062974	ENSORLG00000001925	ENSXETG00000004177	ENSMUSG00000015533
ENSDARG00000053517	ENSORLG00000001926	ENSXETG00000017777	ENSMUSG00000051166
ENSDARG00000075209	ENSORLG00000001927	ENSXETG00000032083	ENSMUSG00000006675
ENSDARG00000070658	ENSORLG00000001928	ENSXETG00000030672	ENSMUSG00000049823
ENSDARG00000078995	ENSORLG00000001933	ENSXETG00000033733	ENSMUSG00000009670
ENSDARG00000042892	ENSORLG00000001934	ENSXETG00000033268	ENSMUSG00000025451
ENSDARG00000075830	ENSORLG00000001935	ENSXETG00000000204	ENSMUSG00000030731
ENSDARG00000026178	ENSORLG00000001936	ENSXETG00000022677	ENSMUSG00000032415
ENSDARG00000061937	ENSORLG00000001941	ENSXETG00000010706	ENSMUSG00000024388
ENSDARG00000030932	ENSORLG00000001942	ENSXETG00000025130	ENSMUSG00000021732
ENSDARG00000014943	ENSORLG00000001944	ENSXETG00000007829	ENSMUSG00000032254
ENSDARG00000014147	ENSORLG00000001945	ENSXETG00000013607	ENSMUSG00000000142
ENSDARG00000004343	ENSORLG00000001948	ENSXETG00000010931	ENSMUSG00000024369
ENSDARG00000025241	ENSORLG00000001949	ENSXETG00000011660	ENSMUSG00000024240
ENSDARG00000020676	ENSORLG00000001951	ENSXETG00000020577	ENSMUSG00000063904
ENSDARG00000004830	ENSORLG00000001952	ENSXETG00000014349	ENSMUSG00000061981
ENSDARG00000079148	ENSORLG00000001953	ENSXETG00000009780	ENSMUSG00000023009
ENSDARG00000077938	ENSORLG00000001955	ENSXETG00000020537	ENSMUSG00000056481
ENSDARG00000005464	ENSORLG00000001957	ENSXETG00000008665	ENSMUSG00000025279
ENSDARG00000078578	ENSORLG00000001959	ENSXETG00000019252	ENSMUSG00000037750
ENSDARG00000036292	ENSORLG00000001963	ENSXETG00000004589	ENSMUSG00000031326
ENSDARG00000008790	ENSORLG00000001964	ENSXETG00000015291	ENSMUSG00000056367
ENSDARG00000004517	ENSORLG00000001965	ENSXETG00000005618	ENSMUSG00000029246
ENSDARG00000053166	ENSORLG00000001966	ENSXETG00000011681	ENSMUSG00000031327
ENSDARG00000060051	ENSORLG00000001967	ENSXETG00000022931	ENSMUSG00000069855
ENSDARG00000041982	ENSORLG00000001971	ENSXETG00000000457	ENSMUSG00000046169
ENSDARG00000023055	ENSORLG00000001975	ENSXETG00000004334	ENSMUSG00000037636
ENSDARG00000037910	ENSORLG00000001976	ENSXETG00000030953	ENSMUSG00000043336
ENSDARG00000071863	ENSORLG00000001977	ENSXETG00000026716	ENSMUSG00000001281
ENSDARG00000033539	ENSORLG00000001979	ENSXETG00000030924	ENSMUSG00000029247
ENSDARG00000092553	ENSORLG00000001981	ENSXETG00000025466	ENSMUSG00000016319
ENSDARG00000035437	ENSORLG00000001985	ENSXETG00000023940	ENSMUSG00000056328
ENSDARG00000060539	ENSORLG00000001986	ENSXETG00000000210	ENSMUSG00000038738
ENSDARG00000039125	ENSORLG00000001987	ENSXETG00000009127	ENSMUSG00000037337
ENSDARG00000006392	ENSORLG00000001989	ENSXETG00000021118	ENSMUSG00000027714
ENSDARG00000013075	ENSORLG00000001990	ENSXETG00000020574	ENSMUSG00000024902
ENSDARG00000043727	ENSORLG00000001991	ENSXETG00000000459	ENSMUSG00000021715
ENSDARG00000060238	ENSORLG00000001992	ENSXETG00000007831	ENSMUSG00000034485
ENSDARG00000019096	ENSORLG00000001993	ENSXETG00000019004	ENSMUSG00000020469
ENSDARG00000075422	ENSORLG00000001995	ENSXETG00000031584	ENSMUSG00000007338
ENSDARG00000069109	ENSORLG00000002000	ENSXETG00000008424	ENSMUSG00000079478
ENSDARG00000019962	ENSORLG00000002001	ENSXETG00000022675	ENSMUSG00000034973
ENSDARG00000063161	ENSORLG00000002002	ENSXETG00000000454	ENSMUSG00000021713
ENSDARG00000094324	ENSORLG00000002007	ENSXETG00000020597	ENSMUSG00000024909
ENSDARG00000037432	ENSORLG00000002009	ENSXETG00000018379	ENSMUSG00000031371
ENSDARG00000068006	ENSORLG00000002010	ENSXETG00000019003	ENSMUSG00000041798
ENSDARG00000009315	ENSORLG00000002011	ENSXETG00000014911	ENSMUSG00000002190
ENSDARG00000062457	ENSORLG00000002014	ENSXETG00000030019	ENSMUSG00000057421
ENSDARG00000087333	ENSORLG00000002015	ENSXETG00000016973	ENSMUSG00000063253
ENSDARG00000069420	ENSORLG00000002016	ENSXETG00000000455	ENSMUSG00000021712
ENSDARG00000087985	ENSORLG00000002018	ENSXETG00000014063	ENSMUSG00000037855
ENSDARG00000062206	ENSORLG00000002021	ENSXETG00000010932	ENSMUSG00000040356
ENSDARG00000063432	ENSORLG00000002023	ENSXETG00000030391	ENSMUSG00000021686
ENSDARG00000038308	ENSORLG00000002028	ENSXETG00000019002	ENSMUSG00000002741
ENSDARG00000016058	ENSORLG00000002032	ENSXETG00000020596	ENSMUSG00000024911
ENSDARG00000062208	ENSORLG00000002034	ENSXETG00000005163	ENSMUSG00000015476
ENSDARG00000061543	ENSORLG00000002035	ENSXETG00000026154	ENSMUSG00000095098
ENSDARG00000056029	ENSORLG00000002036	ENSXETG00000027748	ENSMUSG00000062432
ENSDARG00000074908	ENSORLG00000002037	ENSXETG00000011486	ENSMUSG00000001119
ENSDARG00000069742	ENSORLG00000002038	ENSXETG00000034081	ENSMUSG00000032030
ENSDARG00000088813	ENSORLG00000002040	ENSXETG00000030636	ENSMUSG00000042717
ENSDARG00000052103	ENSORLG00000002041	ENSXETG00000002980	ENSMUSG00000026281
ENSDARG00000023445	ENSORLG00000002042	ENSXETG00000030920	ENSMUSG00000031376
ENSDARG00000057936	ENSORLG00000002044	ENSXETG00000017665	ENSMUSG00000029595
ENSDARG00000015355	ENSORLG00000002045	ENSXETG00000020606	ENSMUSG00000024912
ENSDARG00000054610	ENSORLG00000002046	ENSXETG00000025068	ENSMUSG00000030707
ENSDARG00000041155	ENSORLG00000002048	ENSXETG00000007837	ENSMUSG00000031422
ENSDARG00000035198	ENSORLG00000002049	ENSXETG00000005081	ENSMUSG00000091387
ENSDARG00000037537	ENSORLG00000002052	ENSXETG00000007696	ENSMUSG00000049489
ENSDARG00000030394	ENSORLG00000002053	ENSXETG00000015488	ENSMUSG00000037202
ENSDARG00000062181	ENSORLG00000002055	ENSXETG00000009257	ENSMUSG00000042742
ENSDARG00000096391	ENSORLG00000002056	ENSXETG00000022216	ENSMUSG00000032002
ENSDARG00000008832	ENSORLG00000002057	ENSXETG00000002496	ENSMUSG00000007038
ENSDARG00000052734	ENSORLG00000002060	ENSXETG00000005084	ENSMUSG00000021670
ENSDARG00000062168	ENSORLG00000002066	ENSXETG00000009256	ENSMUSG00000029569
ENSDARG00000052290	ENSORLG00000002071	ENSXETG00000016920	ENSMUSG00000027739
ENSDARG00000031494	ENSORLG00000002072	ENSXETG00000002501	ENSMUSG00000024393
ENSDARG00000055445	ENSORLG00000002073	ENSXETG00000020972	ENSMUSG00000033147
ENSDARG00000063147	ENSORLG00000002078	ENSXETG00000027078	ENSMUSG00000025495
ENSDARG00000077776	ENSORLG00000002080	ENSXETG00000027935	ENSMUSG00000024387
ENSDARG00000069748	ENSORLG00000002081	ENSXETG00000012420	ENSMUSG00000067276
ENSDARG00000069030	ENSORLG00000002083	ENSXETG00000007811	ENSMUSG00000022245
ENSDARG00000017213	ENSORLG00000002084	ENSXETG00000010435	ENSMUSG00000033491
ENSDARG00000013726	ENSORLG00000002087	ENSXETG00000013187	ENSMUSG00000032952
ENSDARG00000079626	ENSORLG00000002091	ENSXETG00000016896	ENSMUSG00000037174
ENSDARG00000004270	ENSORLG00000002092	ENSXETG00000006278	ENSMUSG00000024759
ENSDARG00000002720	ENSORLG00000002095	ENSXETG00000016821	ENSMUSG00000041747
ENSDARG00000052104	ENSORLG00000002098	ENSXETG00000002981	ENSMUSG00000026280
ENSDARG00000078083	ENSORLG00000002104	ENSXETG00000018792	ENSMUSG00000042178
ENSDARG00000035400	ENSORLG00000002109	ENSXETG00000016819	ENSMUSG00000021660
ENSDARG00000055786	ENSORLG00000002112	ENSXETG00000031010	ENSMUSG00000039405
ENSDARG00000037980	ENSORLG00000002120	ENSXETG00000018362	ENSMUSG00000055839
ENSDARG00000001870	ENSORLG00000002122	ENSXETG00000020366	ENSMUSG00000033161
ENSDARG00000010583	ENSORLG00000002125	ENSXETG00000006955	ENSMUSG00000025812
ENSDARG00000045788	ENSORLG00000002126	ENSXETG00000018781	ENSMUSG00000026432
ENSDARG00000036990	ENSORLG00000002127	ENSXETG00000019042	ENSMUSG00000031562
ENSDARG00000059919	ENSORLG00000002128	ENSXETG00000018831	ENSMUSG00000030780
ENSDARG00000078701	ENSORLG00000002129	ENSXETG00000032719	ENSMUSG00000040478
ENSDARG00000086826	ENSORLG00000002132	ENSXETG00000007884	ENSMUSG00000048473
ENSDARG00000018721	ENSORLG00000002136	ENSXETG00000014111	ENSMUSG00000040998
ENSDARG00000093070	ENSORLG00000002138	ENSXETG00000018494	ENSMUSG00000024246
ENSDARG00000058858	ENSORLG00000002139	ENSXETG00000024073	ENSMUSG00000007041
ENSDARG00000025285	ENSORLG00000002140	ENSXETG00000006428	ENSMUSG00000031934
ENSDARG00000063684	ENSORLG00000002146	ENSXETG00000018793	ENSMUSG00000020253
ENSDARG00000045444	ENSORLG00000002147	ENSXETG00000008812	ENSMUSG00000036904
ENSDARG00000060288	ENSORLG00000002148	ENSXETG00000030454	ENSMUSG00000031485
ENSDARG00000024325	ENSORLG00000002149	ENSXETG00000005085	ENSMUSG00000021669
ENSDARG00000078085	ENSORLG00000002150	ENSXETG00000008512	ENSMUSG00000057278
ENSDARG00000040674	ENSORLG00000002151	ENSXETG00000014963	ENSMUSG00000026176
ENSDARG00000027357	ENSORLG00000002153	ENSXETG00000018912	ENSMUSG00000042502
ENSDARG00000016429	ENSORLG00000002154	ENSXETG00000034178	ENSMUSG00000034066
ENSDARG00000040555	ENSORLG00000002156	ENSXETG00000018753	ENSMUSG00000060376
ENSDARG00000011851	ENSORLG00000002158	ENSXETG00000007809	ENSMUSG00000058444
ENSDARG00000057841	ENSORLG00000002161	ENSXETG00000003095	ENSMUSG00000028194
ENSDARG00000068219	ENSORLG00000002162	ENSXETG00000018525	ENSMUSG00000059479
ENSDARG00000078169	ENSORLG00000002164	ENSXETG00000000081	ENSMUSG00000010066
ENSDARG00000043453	ENSORLG00000002169	ENSXETG00000020355	ENSMUSG00000012848
ENSDARG00000075013	ENSORLG00000002170	ENSXETG00000006872	ENSMUSG00000040455
ENSDARG00000078604	ENSORLG00000002172	ENSXETG00000018905	ENSMUSG00000040247
ENSDARG00000063694	ENSORLG00000002173	ENSXETG00000018796	ENSMUSG00000034602
ENSDARG00000059997	ENSORLG00000002175	ENSXETG00000030792	ENSMUSG00000051111
ENSDARG00000039256	ENSORLG00000002177	ENSXETG00000033755	ENSMUSG00000026207
ENSDARG00000015649	ENSORLG00000002178	ENSXETG00000005415	ENSMUSG00000050029
ENSDARG00000011390	ENSORLG00000002179	ENSXETG00000014729	ENSMUSG00000028469
ENSDARG00000069640	ENSORLG00000002180	ENSXETG00000007499	ENSMUSG00000031520
ENSDARG00000070883	ENSORLG00000002182	ENSXETG00000027741	ENSMUSG00000015474
ENSDARG00000016085	ENSORLG00000002183	ENSXETG00000005409	ENSMUSG00000036109
ENSDARG00000052433	ENSORLG00000002184	ENSXETG00000014396	ENSMUSG00000032968
ENSDARG00000012025	ENSORLG00000002188	ENSXETG00000005408	ENSMUSG00000062184
ENSDARG00000060012	ENSORLG00000002189	ENSXETG00000003340	ENSMUSG00000048376
ENSDARG00000036966	ENSORLG00000002190	ENSXETG00000001913	ENSMUSG00000042289
ENSDARG00000087742	ENSORLG00000002196	ENSXETG00000018501	ENSMUSG00000024242
ENSDARG00000026482	ENSORLG00000002199	ENSXETG00000011657	ENSMUSG00000041225
ENSDARG00000020405	ENSORLG00000002201	ENSXETG00000002788	ENSMUSG00000006024
ENSDARG00000045510	ENSORLG00000002203	ENSXETG00000023322	ENSMUSG00000051864
ENSDARG00000071671	ENSORLG00000002204	ENSXETG00000007198	ENSMUSG00000037349
ENSDARG00000036096	ENSORLG00000002207	ENSXETG00000007804	ENSMUSG00000032402
ENSDARG00000078981	ENSORLG00000002208	ENSXETG00000000797	ENSMUSG00000028246
ENSDARG00000038729	ENSORLG00000002215	ENSXETG00000017078	ENSMUSG00000021679
ENSDARG00000024090	ENSORLG00000002216	ENSXETG00000007197	ENSMUSG00000024963
ENSDARG00000077964	ENSORLG00000002218	ENSXETG00000031781	ENSMUSG00000025239
ENSDARG00000038475	ENSORLG00000002219	ENSXETG00000032120	ENSMUSG00000023262
ENSDARG00000026941	ENSORLG00000002220	ENSXETG00000001389	ENSMUSG00000040410
ENSDARG00000061159	ENSORLG00000002222	ENSXETG00000002787	ENSMUSG00000070808
ENSDARG00000076262	ENSORLG00000002223	ENSXETG00000028057	ENSMUSG00000056854
ENSDARG00000009830	ENSORLG00000002226	ENSXETG00000012164	ENSMUSG00000062791
ENSDARG00000031763	ENSORLG00000002227	ENSXETG00000015939	ENSMUSG00000036867
ENSDARG00000024831	ENSORLG00000002228	ENSXETG00000017080	ENSMUSG00000021680
ENSDARG00000069184	ENSORLG00000002230	ENSXETG00000014428	ENSMUSG00000044949
ENSDARG00000058943	ENSORLG00000002231	ENSXETG00000020140	ENSMUSG00000035498
ENSDARG00000052470	ENSORLG00000002232	ENSXETG00000019875	ENSMUSG00000039323
ENSDARG00000068291	ENSORLG00000002234	ENSXETG00000033520	ENSMUSG00000014856
ENSDARG00000076541	ENSORLG00000002236	ENSXETG00000020143	ENSMUSG00000025784
ENSDARG00000058257	ENSORLG00000002240	ENSXETG00000004651	ENSMUSG00000072572
ENSDARG00000040362	ENSORLG00000002244	ENSXETG00000002783	ENSMUSG00000074364
ENSDARG00000044114	ENSORLG00000002245	ENSXETG00000025206	ENSMUSG00000037190
ENSDARG00000054362	ENSORLG00000002246	ENSXETG00000003246	ENSMUSG00000078622
ENSDARG00000021208	ENSORLG00000002247	ENSXETG00000022417	ENSMUSG00000022766
ENSDARG00000003235	ENSORLG00000002248	ENSXETG00000021359	ENSMUSG00000040667
ENSDARG00000078016	ENSORLG00000002249	ENSXETG00000011970	ENSMUSG00000039982
ENSDARG00000062078	ENSORLG00000002250	ENSXETG00000013450	ENSMUSG00000040151
ENSDARG00000043336	ENSORLG00000002251	ENSXETG00000020144	ENSMUSG00000025785
ENSDARG00000089464	ENSORLG00000002252	ENSXETG00000011499	ENSMUSG00000010505
ENSDARG00000078908	ENSORLG00000002253	ENSXETG00000011776	ENSMUSG00000047013
ENSDARG00000074691	ENSORLG00000002254	ENSXETG00000000796	ENSMUSG00000045751
ENSDARG00000069951	ENSORLG00000002258	ENSXETG00000001182	ENSMUSG00000037742
ENSDARG00000054749	ENSORLG00000002259	ENSXETG00000023295	ENSMUSG00000028266
ENSDARG00000022614	ENSORLG00000002267	ENSXETG00000011767	ENSMUSG00000070291
ENSDARG00000054355	ENSORLG00000002269	ENSXETG00000005311	ENSMUSG00000049354
ENSDARG00000058230	ENSORLG00000002272	ENSXETG00000010731	ENSMUSG00000024830
ENSDARG00000063706	ENSORLG00000002273	ENSXETG00000017075	ENSMUSG00000021684
ENSDARG00000059718	ENSORLG00000002275	ENSXETG00000006089	ENSMUSG00000046589
ENSDARG00000063031	ENSORLG00000002276	ENSXETG00000000070	ENSMUSG00000040661
ENSDARG00000069954	ENSORLG00000002279	ENSXETG00000004775	ENSMUSG00000028033
ENSDARG00000020454	ENSORLG00000002285	ENSXETG00000002818	ENSMUSG00000030591
ENSDARG00000044146	ENSORLG00000002286	ENSXETG00000006088	ENSMUSG00000046079
ENSDARG00000037337	ENSORLG00000002288	ENSXETG00000025936	ENSMUSG00000044629
ENSDARG00000052520	ENSORLG00000002289	ENSXETG00000019854	ENSMUSG00000050931
ENSDARG00000041449	ENSORLG00000002291	ENSXETG00000018057	ENSMUSG00000027351
ENSDARG00000063051	ENSORLG00000002293	ENSXETG00000000091	ENSMUSG00000021901
ENSDARG00000070129	ENSORLG00000002295	ENSXETG00000023986	ENSMUSG00000034384
ENSDARG00000074131	ENSORLG00000002296	ENSXETG00000011658	ENSMUSG00000006740
ENSDARG00000009851	ENSORLG00000002299	ENSXETG00000017074	ENSMUSG00000042015
ENSDARG00000001890	ENSORLG00000002300	ENSXETG00000014491	ENSMUSG00000032437
ENSDARG00000020845	ENSORLG00000002301	ENSXETG00000030354	ENSMUSG00000055322
ENSDARG00000044574	ENSORLG00000002306	ENSXETG00000032055	ENSMUSG00000039607
ENSDARG00000091010	ENSORLG00000002307	ENSXETG00000033314	ENSMUSG00000096916
ENSDARG00000061168	ENSORLG00000002308	ENSXETG00000012176	ENSMUSG00000006019
ENSDARG00000075865	ENSORLG00000002309	ENSXETG00000003625	ENSMUSG00000063434
ENSDARG00000004306	ENSORLG00000002310	ENSXETG00000030225	ENSMUSG00000054792
ENSDARG00000003576	ENSORLG00000002313	ENSXETG00000000794	ENSMUSG00000040387
ENSDARG00000073779	ENSORLG00000002314	ENSXETG00000007392	ENSMUSG00000028986
ENSDARG00000026804	ENSORLG00000002315	ENSXETG00000006157	ENSMUSG00000009647
ENSDARG00000069438	ENSORLG00000002316	ENSXETG00000011397	ENSMUSG00000047180
ENSDARG00000067567	ENSORLG00000002318	ENSXETG00000028021	ENSMUSG00000030307
ENSDARG00000062270	ENSORLG00000002319	ENSXETG00000016385	ENSMUSG00000070871
ENSDARG00000006640	ENSORLG00000002320	ENSXETG00000019924	ENSMUSG00000032446
ENSDARG00000021664	ENSORLG00000002321	ENSXETG00000004106	ENSMUSG00000007989
ENSDARG00000076169	ENSORLG00000002322	ENSXETG00000026450	ENSMUSG00000030726
ENSDARG00000090716	ENSORLG00000002325	ENSXETG00000010738	ENSMUSG00000047126
ENSDARG00000016769	ENSORLG00000002328	ENSXETG00000000452	ENSMUSG00000042743
ENSDARG00000008953	ENSORLG00000002329	ENSXETG00000016634	ENSMUSG00000046020
ENSDARG00000012051	ENSORLG00000002331	ENSXETG00000009654	ENSMUSG00000025956
ENSDARG00000060148	ENSORLG00000002337	ENSXETG00000011399	ENSMUSG00000040711
ENSDARG00000076657	ENSORLG00000002338	ENSXETG00000005654	ENSMUSG00000051413
ENSDARG00000061082	ENSORLG00000002341	ENSXETG00000000929	ENSMUSG00000030172
ENSDARG00000016116	ENSORLG00000002342	ENSXETG00000031092	ENSMUSG00000057098
ENSDARG00000037334	ENSORLG00000002343	ENSXETG00000017344	ENSMUSG00000078970
ENSDARG00000026835	ENSORLG00000002345	ENSXETG00000004096	ENSMUSG00000022299
ENSDARG00000002536	ENSORLG00000002348	ENSXETG00000031197	ENSMUSG00000068040
ENSDARG00000027153	ENSORLG00000002349	ENSXETG00000002046	ENSMUSG00000074991
ENSDARG00000071878	ENSORLG00000002350	ENSXETG00000007218	ENSMUSG00000038812
ENSDARG00000004785	ENSORLG00000002351	ENSXETG00000008784	ENSMUSG00000027206
ENSDARG00000077942	ENSORLG00000002352	ENSXETG00000015640	ENSMUSG00000037966
ENSDARG00000007734	ENSORLG00000002353	ENSXETG00000011402	ENSMUSG00000042694
ENSDARG00000062707	ENSORLG00000002355	ENSXETG00000016792	ENSMUSG00000031538
ENSDARG00000056649	ENSORLG00000002356	ENSXETG00000019749	ENSMUSG00000067873
ENSDARG00000060348	ENSORLG00000002357	ENSXETG00000018442	ENSMUSG00000020700
ENSDARG00000053586	ENSORLG00000002359	ENSXETG00000007299	ENSMUSG00000063889
ENSDARG00000059387	ENSORLG00000002360	ENSXETG00000008786	ENSMUSG00000027208
ENSDARG00000091304	ENSORLG00000002361	ENSXETG00000032153	ENSMUSG00000037960
ENSDARG00000002267	ENSORLG00000002363	ENSXETG00000004092	ENSMUSG00000022300
ENSDARG00000036900	ENSORLG00000002364	ENSXETG00000024110	ENSMUSG00000058952
ENSDARG00000043821	ENSORLG00000002366	ENSXETG00000016394	ENSMUSG00000025959
ENSDARG00000075571	ENSORLG00000002367	ENSXETG00000033398	ENSMUSG00000037933
ENSDARG00000058647	ENSORLG00000002368	ENSXETG00000024009	ENSMUSG00000027579
ENSDARG00000078063	ENSORLG00000002369	ENSXETG00000012728	ENSMUSG00000024191
ENSDARG00000008502	ENSORLG00000002371	ENSXETG00000017349	ENSMUSG00000020116
ENSDARG00000059386	ENSORLG00000002373	ENSXETG00000008787	ENSMUSG00000023330
ENSDARG00000006215	ENSORLG00000002374	ENSXETG00000011530	ENSMUSG00000045410
ENSDARG00000056704	ENSORLG00000002375	ENSXETG00000010906	ENSMUSG00000034353
ENSDARG00000087032	ENSORLG00000002376	ENSXETG00000002015	ENSMUSG00000038980
ENSDARG00000042510	ENSORLG00000002377	ENSXETG00000025632	ENSMUSG00000060317
ENSDARG00000017821	ENSORLG00000002378	ENSXETG00000005127	ENSMUSG00000015627
ENSDARG00000036911	ENSORLG00000002381	ENSXETG00000000547	ENSMUSG00000021687
ENSDARG00000021112	ENSORLG00000002382	ENSXETG00000025934	ENSMUSG00000000581
ENSDARG00000073952	ENSORLG00000002385	ENSXETG00000019911	ENSMUSG00000021733
ENSDARG00000087010	ENSORLG00000002389	ENSXETG00000031818	ENSMUSG00000024773
ENSDARG00000007217	ENSORLG00000002390	ENSXETG00000032516	ENSMUSG00000042660
ENSDARG00000063207	ENSORLG00000002392	ENSXETG00000015826	ENSMUSG00000062209
ENSDARG00000029738	ENSORLG00000002396	ENSXETG00000003071	ENSMUSG00000006369
ENSDARG00000021033	ENSORLG00000002397	ENSXETG00000013111	ENSMUSG00000008429
ENSDARG00000077606	ENSORLG00000002398	ENSXETG00000000542	ENSMUSG00000036412
ENSDARG00000053186	ENSORLG00000002399	ENSXETG00000032189	ENSMUSG00000050666
ENSDARG00000013776	ENSORLG00000002400	ENSXETG00000000451	ENSMUSG00000021710
ENSDARG00000062154	ENSORLG00000002403	ENSXETG00000026921	ENSMUSG00000048264
ENSDARG00000024037	ENSORLG00000002404	ENSXETG00000033269	ENSMUSG00000024579
ENSDARG00000025703	ENSORLG00000002405	ENSXETG00000000527	ENSMUSG00000042102
ENSDARG00000075948	ENSORLG00000002407	ENSXETG00000011257	ENSMUSG00000038963
ENSDARG00000071107	ENSORLG00000002408	ENSXETG00000003073	ENSMUSG00000022382
ENSDARG00000013741	ENSORLG00000002409	ENSXETG00000006918	ENSMUSG00000026000
ENSDARG00000022161	ENSORLG00000002416	ENSXETG00000032173	ENSMUSG00000042496
ENSDARG00000074680	ENSORLG00000002417	ENSXETG00000002308	ENSMUSG00000041670
ENSDARG00000077577	ENSORLG00000002419	ENSXETG00000003418	ENSMUSG00000027568
ENSDARG00000087823	ENSORLG00000002424	ENSXETG00000012271	ENSMUSG00000022792
ENSDARG00000037929	ENSORLG00000002426	ENSXETG00000003248	ENSMUSG00000069631
ENSDARG00000078347	ENSORLG00000002427	ENSXETG00000004069	ENSMUSG00000022303
ENSDARG00000079452	ENSORLG00000002429	ENSXETG00000022412	ENSMUSG00000033882
ENSDARG00000013430	ENSORLG00000002431	ENSXETG00000000523	ENSMUSG00000069324
ENSDARG00000023536	ENSORLG00000002434	ENSXETG00000016591	ENSMUSG00000025453
ENSDARG00000008372	ENSORLG00000002435	ENSXETG00000014000	ENSMUSG00000037239
ENSDARG00000071551	ENSORLG00000002436	ENSXETG00000004548	ENSMUSG00000022471
ENSDARG00000038456	ENSORLG00000002437	ENSXETG00000001312	ENSMUSG00000040112
ENSDARG00000030665	ENSORLG00000002439	ENSXETG00000002324	ENSMUSG00000024498
ENSDARG00000057718	ENSORLG00000002440	ENSXETG00000033846	ENSMUSG00000028004
ENSDARG00000044628	ENSORLG00000002441	ENSXETG00000000790	ENSMUSG00000027430
ENSDARG00000037930	ENSORLG00000002442	ENSXETG00000002042	ENSMUSG00000036537
ENSDARG00000091305	ENSORLG00000002445	ENSXETG00000006895	ENSMUSG00000022426
ENSDARG00000061328	ENSORLG00000002446	ENSXETG00000000029	ENSMUSG00000038119
ENSDARG00000029689	ENSORLG00000002447	ENSXETG00000015654	ENSMUSG00000021957
ENSDARG00000092836	ENSORLG00000002448	ENSXETG00000000520	ENSMUSG00000021690
ENSDARG00000012513	ENSORLG00000002449	ENSXETG00000005663	ENSMUSG00000027456
ENSDARG00000088357	ENSORLG00000002450	ENSXETG00000001085	ENSMUSG00000026003
ENSDARG00000052438	ENSORLG00000002451	ENSXETG00000014001	ENSMUSG00000020152
ENSDARG00000020741	ENSORLG00000002453	ENSXETG00000026093	ENSMUSG00000028001
ENSDARG00000006760	ENSORLG00000002454	ENSXETG00000000793	ENSMUSG00000063873
ENSDARG00000071674	ENSORLG00000002456	ENSXETG00000021888	ENSMUSG00000041168
ENSDARG00000055525	ENSORLG00000002459	ENSXETG00000025808	ENSMUSG00000048398
ENSDARG00000025535	ENSORLG00000002460	ENSXETG00000001496	ENSMUSG00000006169
ENSDARG00000079480	ENSORLG00000002461	ENSXETG00000014684	ENSMUSG00000055567
ENSDARG00000055076	ENSORLG00000002462	ENSXETG00000022637	ENSMUSG00000009941
ENSDARG00000079123	ENSORLG00000002465	ENSXETG00000016790	ENSMUSG00000031537
ENSDARG00000079543	ENSORLG00000002467	ENSXETG00000004066	ENSMUSG00000022304
ENSDARG00000042933	ENSORLG00000002469	ENSXETG00000022045	ENSMUSG00000005804
ENSDARG00000074181	ENSORLG00000002470	ENSXETG00000014032	ENSMUSG00000033707
ENSDARG00000007517	ENSORLG00000002474	ENSXETG00000000519	ENSMUSG00000007617
ENSDARG00000077533	ENSORLG00000002475	ENSXETG00000002620	ENSMUSG00000031029
ENSDARG00000010514	ENSORLG00000002476	ENSXETG00000010067	ENSMUSG00000047880
ENSDARG00000044083	ENSORLG00000002477	ENSXETG00000012997	ENSMUSG00000020134
ENSDARG00000069373	ENSORLG00000002479	ENSXETG00000025028	ENSMUSG00000025532
ENSDARG00000058346	ENSORLG00000002482	ENSXETG00000009182	ENSMUSG00000027959
ENSDARG00000007245	ENSORLG00000002487	ENSXETG00000007363	ENSMUSG00000006575
ENSDARG00000077145	ENSORLG00000002488	ENSXETG00000021179	ENSMUSG00000020654
ENSDARG00000096425	ENSORLG00000002490	ENSXETG00000017583	ENSMUSG00000024505
ENSDARG00000008969	ENSORLG00000002492	ENSXETG00000022431	ENSMUSG00000033831
ENSDARG00000038612	ENSORLG00000002494	ENSXETG00000033757	ENSMUSG00000042433
ENSDARG00000078529	ENSORLG00000002495	ENSXETG00000019150	ENSMUSG00000034730
ENSDARG00000076430	ENSORLG00000002496	ENSXETG00000022974	ENSMUSG00000055024
ENSDARG00000033361	ENSORLG00000002500	ENSXETG00000030942	ENSMUSG00000025533
ENSDARG00000043550	ENSORLG00000002502	ENSXETG00000015620	ENSMUSG00000013155
ENSDARG00000038615	ENSORLG00000002505	ENSXETG00000017004	ENSMUSG00000035953
ENSDARG00000061338	ENSORLG00000002506	ENSXETG00000010061	ENSMUSG00000032097
ENSDARG00000003749	ENSORLG00000002509	ENSXETG00000016788	ENSMUSG00000031536
ENSDARG00000056079	ENSORLG00000002510	ENSXETG00000022981	ENSMUSG00000022394
ENSDARG00000058454	ENSORLG00000002511	ENSXETG00000007996	ENSMUSG00000064063
ENSDARG00000088073	ENSORLG00000002513	ENSXETG00000005660	ENSMUSG00000049119
ENSDARG00000038213	ENSORLG00000002514	ENSXETG00000015126	ENSMUSG00000020873
ENSDARG00000040184	ENSORLG00000002515	ENSXETG00000007102	ENSMUSG00000066037
ENSDARG00000043210	ENSORLG00000002516	ENSXETG00000008149	ENSMUSG00000008575
ENSDARG00000075903	ENSORLG00000002517	ENSXETG00000022982	ENSMUSG00000063765
ENSDARG00000058451	ENSORLG00000002519	ENSXETG00000004304	ENSMUSG00000091086
ENSDARG00000059983	ENSORLG00000002520	ENSXETG00000014074	ENSMUSG00000039531
ENSDARG00000077911	ENSORLG00000002521	ENSXETG00000021551	ENSMUSG00000032098
ENSDARG00000017772	ENSORLG00000002524	ENSXETG00000013016	ENSMUSG00000020321
ENSDARG00000030938	ENSORLG00000002526	ENSXETG00000027692	ENSMUSG00000024965
ENSDARG00000069767	ENSORLG00000002527	ENSXETG00000009243	ENSMUSG00000032012
ENSDARG00000029381	ENSORLG00000002528	ENSXETG00000013484	ENSMUSG00000019102
ENSDARG00000052536	ENSORLG00000002529	ENSXETG00000008514	ENSMUSG00000071337
ENSDARG00000005371	ENSORLG00000002530	ENSXETG00000032107	ENSMUSG00000019905
ENSDARG00000074590	ENSORLG00000002531	ENSXETG00000013020	ENSMUSG00000020319
ENSDARG00000053138	ENSORLG00000002532	ENSXETG00000006029	ENSMUSG00000029028
ENSDARG00000059373	ENSORLG00000002534	ENSXETG00000012902	ENSMUSG00000054405
ENSDARG00000011693	ENSORLG00000002535	ENSXETG00000021566	ENSMUSG00000039438
ENSDARG00000011235	ENSORLG00000002536	ENSXETG00000015687	ENSMUSG00000021848
ENSDARG00000017708	ENSORLG00000002541	ENSXETG00000012852	ENSMUSG00000063052
ENSDARG00000059636	ENSORLG00000002545	ENSXETG00000008515	ENSMUSG00000046679
ENSDARG00000041317	ENSORLG00000002547	ENSXETG00000006331	ENSMUSG00000022391
ENSDARG00000060041	ENSORLG00000002549	ENSXETG00000008805	ENSMUSG00000056394
ENSDARG00000035563	ENSORLG00000002552	ENSXETG00000024347	ENSMUSG00000085795
ENSDARG00000028159	ENSORLG00000002553	ENSXETG00000003395	ENSMUSG00000055320
ENSDARG00000057927	ENSORLG00000002556	ENSXETG00000010285	ENSMUSG00000031309
ENSDARG00000058319	ENSORLG00000002558	ENSXETG00000019671	ENSMUSG00000073542
ENSDARG00000076189	ENSORLG00000002559	ENSXETG00000006014	ENSMUSG00000047810
ENSDARG00000038609	ENSORLG00000002561	ENSXETG00000034086	ENSMUSG00000056569
ENSDARG00000043643	ENSORLG00000002562	ENSXETG00000013029	ENSMUSG00000042302
ENSDARG00000062954	ENSORLG00000002563	ENSXETG00000003831	ENSMUSG00000032316
ENSDARG00000038881	ENSORLG00000002564	ENSXETG00000020333	ENSMUSG00000036880
ENSDARG00000091902	ENSORLG00000002565	ENSXETG00000002237	ENSMUSG00000051650
ENSDARG00000053853	ENSORLG00000002566	ENSXETG00000023776	ENSMUSG00000001095
ENSDARG00000045131	ENSORLG00000002567	ENSXETG00000025736	ENSMUSG00000021379
ENSDARG00000061724	ENSORLG00000002569	ENSXETG00000015666	ENSMUSG00000015697
ENSDARG00000043554	ENSORLG00000002574	ENSXETG00000018600	ENSMUSG00000022706
ENSDARG00000004325	ENSORLG00000002575	ENSXETG00000006828	ENSMUSG00000028914
ENSDARG00000032725	ENSORLG00000002576	ENSXETG00000004519	ENSMUSG00000020460
ENSDARG00000044362	ENSORLG00000002577	ENSXETG00000019348	ENSMUSG00000002058
ENSDARG00000039117	ENSORLG00000002582	ENSXETG00000006333	ENSMUSG00000022389
ENSDARG00000078378	ENSORLG00000002584	ENSXETG00000003950	ENSMUSG00000026942
ENSDARG00000056804	ENSORLG00000002585	ENSXETG00000008901	ENSMUSG00000069873
ENSDARG00000041141	ENSORLG00000002586	ENSXETG00000009448	ENSMUSG00000000724
ENSDARG00000037363	ENSORLG00000002587	ENSXETG00000025668	ENSMUSG00000031024
ENSDARG00000012387	ENSORLG00000002588	ENSXETG00000006212	ENSMUSG00000047674
ENSDARG00000070688	ENSORLG00000002589	ENSXETG00000006631	ENSMUSG00000051359
ENSDARG00000059699	ENSORLG00000002590	ENSXETG00000006830	ENSMUSG00000040697
ENSDARG00000045155	ENSORLG00000002591	ENSXETG00000006893	ENSMUSG00000061360
ENSDARG00000026654	ENSORLG00000002592	ENSXETG00000008037	ENSMUSG00000010392
ENSDARG00000000212	ENSORLG00000002594	ENSXETG00000017467	ENSMUSG00000020913
ENSDARG00000019728	ENSORLG00000002596	ENSXETG00000003655	ENSMUSG00000021796
ENSDARG00000073923	ENSORLG00000002597	ENSXETG00000031357	ENSMUSG00000046947
ENSDARG00000058992	ENSORLG00000002602	ENSXETG00000008931	ENSMUSG00000008206
ENSDARG00000029331	ENSORLG00000002605	ENSXETG00000027265	ENSMUSG00000059995
ENSDARG00000069775	ENSORLG00000002610	ENSXETG00000030638	ENSMUSG00000047746
ENSDARG00000010051	ENSORLG00000002611	ENSXETG00000018601	ENSMUSG00000005262
ENSDARG00000056467	ENSORLG00000002612	ENSXETG00000003357	ENSMUSG00000034757
ENSDARG00000061974	ENSORLG00000002613	ENSXETG00000006632	ENSMUSG00000022286
ENSDARG00000021584	ENSORLG00000002616	ENSXETG00000005492	ENSMUSG00000039488
ENSDARG00000056468	ENSORLG00000002620	ENSXETG00000003361	ENSMUSG00000034768
ENSDARG00000056307	ENSORLG00000002621	ENSXETG00000027722	ENSMUSG00000062397
ENSDARG00000021948	ENSORLG00000002627	ENSXETG00000023938	ENSMUSG00000033327
ENSDARG00000034668	ENSORLG00000002630	ENSXETG00000012296	ENSMUSG00000028137
ENSDARG00000041323	ENSORLG00000002636	ENSXETG00000033238	ENSMUSG00000042109
ENSDARG00000058352	ENSORLG00000002637	ENSXETG00000006223	ENSMUSG00000047565
ENSDARG00000010472	ENSORLG00000002639	ENSXETG00000008125	ENSMUSG00000007097
ENSDARG00000058089	ENSORLG00000002642	ENSXETG00000018652	ENSMUSG00000028106
ENSDARG00000056619	ENSORLG00000002644	ENSXETG00000005487	ENSMUSG00000050730
ENSDARG00000013830	ENSORLG00000002648	ENSXETG00000002006	ENSMUSG00000039050
ENSDARG00000035966	ENSORLG00000002651	ENSXETG00000005482	ENSMUSG00000031870
ENSDARG00000016871	ENSORLG00000002654	ENSXETG00000021355	ENSMUSG00000037935
ENSDARG00000070985	ENSORLG00000002655	ENSXETG00000028038	ENSMUSG00000095920
ENSDARG00000031774	ENSORLG00000002656	ENSXETG00000023207	ENSMUSG00000057541
ENSDARG00000079271	ENSORLG00000002658	ENSXETG00000004630	ENSMUSG00000039450
ENSDARG00000077943	ENSORLG00000002659	ENSXETG00000005479	ENSMUSG00000071652
ENSDARG00000027590	ENSORLG00000002669	ENSXETG00000012166	ENSMUSG00000026276
ENSDARG00000038524	ENSORLG00000002670	ENSXETG00000021480	ENSMUSG00000041417
ENSDARG00000009933	ENSORLG00000002671	ENSXETG00000001795	ENSMUSG00000062075
ENSDARG00000038608	ENSORLG00000002673	ENSXETG00000002617	ENSMUSG00000058076
ENSDARG00000043716	ENSORLG00000002676	ENSXETG00000018604	ENSMUSG00000041378
ENSDARG00000077948	ENSORLG00000002678	ENSXETG00000010009	ENSMUSG00000034235
ENSDARG00000079822	ENSORLG00000002686	ENSXETG00000012785	ENSMUSG00000032589
ENSDARG00000046154	ENSORLG00000002692	ENSXETG00000006218	ENSMUSG00000079508
ENSDARG00000013012	ENSORLG00000002693	ENSXETG00000027840	ENSMUSG00000064081
ENSDARG00000014005	ENSORLG00000002696	ENSXETG00000003003	ENSMUSG00000025145
ENSDARG00000001634	ENSORLG00000002699	ENSXETG00000030921	ENSMUSG00000041734
ENSDARG00000078270	ENSORLG00000002700	ENSXETG00000021463	ENSMUSG00000034751
ENSDARG00000045401	ENSORLG00000002702	ENSXETG00000014744	ENSMUSG00000038437
ENSDARG00000074892	ENSORLG00000002704	ENSXETG00000022759	ENSMUSG00000026239
ENSDARG00000060954	ENSORLG00000002705	ENSXETG00000001473	ENSMUSG00000030126
ENSDARG00000039005	ENSORLG00000002706	ENSXETG00000009070	ENSMUSG00000049299
ENSDARG00000012040	ENSORLG00000002707	ENSXETG00000017873	ENSMUSG00000022280
ENSDARG00000068401	ENSORLG00000002708	ENSXETG00000016011	ENSMUSG00000053110
ENSDARG00000009764	ENSORLG00000002711	ENSXETG00000021460	ENSMUSG00000032621
ENSDARG00000056045	ENSORLG00000002713	ENSXETG00000013430	ENSMUSG00000042638
ENSDARG00000019117	ENSORLG00000002715	ENSXETG00000004872	ENSMUSG00000022438
ENSDARG00000008292	ENSORLG00000002716	ENSXETG00000006225	ENSMUSG00000069049
ENSDARG00000090815	ENSORLG00000002717	ENSXETG00000019842	ENSMUSG00000044708
ENSDARG00000079701	ENSORLG00000002721	ENSXETG00000005580	ENSMUSG00000062646
ENSDARG00000043720	ENSORLG00000002724	ENSXETG00000018602	ENSMUSG00000000028
ENSDARG00000055763	ENSORLG00000002728	ENSXETG00000000082	ENSMUSG00000010045
ENSDARG00000059398	ENSORLG00000002730	ENSXETG00000018412	ENSMUSG00000059208
ENSDARG00000044281	ENSORLG00000002731	ENSXETG00000000448	ENSMUSG00000021709
ENSDARG00000073988	ENSORLG00000002734	ENSXETG00000019434	ENSMUSG00000000282
ENSDARG00000043037	ENSORLG00000002735	ENSXETG00000000340	ENSMUSG00000029802
ENSDARG00000074577	ENSORLG00000002738	ENSXETG00000001527	ENSMUSG00000004508
ENSDARG00000019797	ENSORLG00000002740	ENSXETG00000009347	ENSMUSG00000006673
ENSDARG00000062235	ENSORLG00000002741	ENSXETG00000009217	ENSMUSG00000027702
ENSDARG00000094673	ENSORLG00000002742	ENSXETG00000005934	ENSMUSG00000002233
ENSDARG00000004017	ENSORLG00000002743	ENSXETG00000017876	ENSMUSG00000037617
ENSDARG00000090840	ENSORLG00000002746	ENSXETG00000020822	ENSMUSG00000030393
ENSDARG00000007271	ENSORLG00000002749	ENSXETG00000009218	ENSMUSG00000037730
ENSDARG00000012674	ENSORLG00000002750	ENSXETG00000023546	ENSMUSG00000032044
ENSDARG00000006010	ENSORLG00000002752	ENSXETG00000014746	ENSMUSG00000026739
ENSDARG00000002240	ENSORLG00000002755	ENSXETG00000021040	ENSMUSG00000018286
ENSDARG00000007624	ENSORLG00000002756	ENSXETG00000027032	ENSMUSG00000027454
ENSDARG00000056774	ENSORLG00000002758	ENSXETG00000033722	ENSMUSG00000026424
ENSDARG00000052717	ENSORLG00000002759	ENSXETG00000017882	ENSMUSG00000048230
ENSDARG00000024771	ENSORLG00000002760	ENSXETG00000018406	ENSMUSG00000035183
ENSDARG00000077409	ENSORLG00000002761	ENSXETG00000006897	ENSMUSG00000022428
ENSDARG00000010385	ENSORLG00000002766	ENSXETG00000030625	ENSMUSG00000000486
ENSDARG00000061450	ENSORLG00000002769	ENSXETG00000029933	ENSMUSG00000033985
ENSDARG00000079549	ENSORLG00000002772	ENSXETG00000033182	ENSMUSG00000049521
ENSDARG00000062614	ENSORLG00000002778	ENSXETG00000010455	ENSMUSG00000018995
ENSDARG00000086797	ENSORLG00000002779	ENSXETG00000005477	ENSMUSG00000071655
ENSDARG00000071004	ENSORLG00000002780	ENSXETG00000012789	ENSMUSG00000032046
ENSDARG00000079296	ENSORLG00000002782	ENSXETG00000013178	ENSMUSG00000000394
ENSDARG00000075616	ENSORLG00000002783	ENSXETG00000025929	ENSMUSG00000045996
ENSDARG00000003373	ENSORLG00000002784	ENSXETG00000016010	ENSMUSG00000036513
ENSDARG00000090225	ENSORLG00000002787	ENSXETG00000017855	ENSMUSG00000037646
ENSDARG00000086680	ENSORLG00000002788	ENSXETG00000009831	ENSMUSG00000029217
ENSDARG00000014793	ENSORLG00000002790	ENSXETG00000001638	ENSMUSG00000024772
ENSDARG00000074161	ENSORLG00000002794	ENSXETG00000033271	ENSMUSG00000047888
ENSDARG00000054164	ENSORLG00000002795	ENSXETG00000010088	ENSMUSG00000034211
ENSDARG00000014091	ENSORLG00000002797	ENSXETG00000007992	ENSMUSG00000048387
ENSDARG00000026084	ENSORLG00000002804	ENSXETG00000027345	ENSMUSG00000040164
ENSDARG00000007025	ENSORLG00000002806	ENSXETG00000006013	ENSMUSG00000071660
ENSDARG00000062765	ENSORLG00000002807	ENSXETG00000015186	ENSMUSG00000054823
ENSDARG00000045150	ENSORLG00000002810	ENSXETG00000006357	ENSMUSG00000022433
ENSDARG00000059743	ENSORLG00000002812	ENSXETG00000018649	ENSMUSG00000035413
ENSDARG00000003811	ENSORLG00000002814	ENSXETG00000022253	ENSMUSG00000036606
ENSDARG00000043497	ENSORLG00000002816	ENSXETG00000021947	ENSMUSG00000019124
ENSDARG00000007264	ENSORLG00000002817	ENSXETG00000010086	ENSMUSG00000034285
ENSDARG00000021147	ENSORLG00000002818	ENSXETG00000003907	ENSMUSG00000038879
ENSDARG00000034264	ENSORLG00000002819	ENSXETG00000015288	ENSMUSG00000048078
ENSDARG00000020730	ENSORLG00000002821	ENSXETG00000004252	ENSMUSG00000005899
ENSDARG00000011533	ENSORLG00000002823	ENSXETG00000018391	ENSMUSG00000027200
ENSDARG00000035986	ENSORLG00000002826	ENSXETG00000019669	ENSMUSG00000024539
ENSDARG00000045147	ENSORLG00000002830	ENSXETG00000006356	ENSMUSG00000009035
ENSDARG00000039754	ENSORLG00000002833	ENSXETG00000033244	ENSMUSG00000030094
ENSDARG00000089546	ENSORLG00000002834	ENSXETG00000022264	ENSMUSG00000051786
ENSDARG00000031203	ENSORLG00000002836	ENSXETG00000002235	ENSMUSG00000051355
ENSDARG00000060994	ENSORLG00000002838	ENSXETG00000027136	ENSMUSG00000028086
ENSDARG00000037883	ENSORLG00000002842	ENSXETG00000023175	ENSMUSG00000061119
ENSDARG00000035987	ENSORLG00000002843	ENSXETG00000019670	ENSMUSG00000024537
ENSDARG00000029865	ENSORLG00000002844	ENSXETG00000016851	ENSMUSG00000027339
ENSDARG00000018600	ENSORLG00000002848	ENSXETG00000007784	ENSMUSG00000056666
ENSDARG00000023878	ENSORLG00000002850	ENSXETG00000023524	ENSMUSG00000063410
ENSDARG00000002021	ENSORLG00000002852	ENSXETG00000012788	ENSMUSG00000032648
ENSDARG00000037884	ENSORLG00000002854	ENSXETG00000013633	ENSMUSG00000030643
ENSDARG00000090152	ENSORLG00000002856	ENSXETG00000017613	ENSMUSG00000036977
ENSDARG00000027397	ENSORLG00000002857	ENSXETG00000005842	ENSMUSG00000026556
ENSDARG00000021252	ENSORLG00000002860	ENSXETG00000010077	ENSMUSG00000020698
ENSDARG00000012848	ENSORLG00000002861	ENSXETG00000024753	ENSMUSG00000064145
ENSDARG00000094992	ENSORLG00000002864	ENSXETG00000013025	ENSMUSG00000005917
ENSDARG00000043247	ENSORLG00000002865	ENSXETG00000027469	ENSMUSG00000041303
ENSDARG00000014123	ENSORLG00000002867	ENSXETG00000005540	ENSMUSG00000062203
ENSDARG00000008890	ENSORLG00000002869	ENSXETG00000005795	ENSMUSG00000005949
ENSDARG00000052966	ENSORLG00000002870	ENSXETG00000003237	ENSMUSG00000020936
ENSDARG00000033768	ENSORLG00000002871	ENSXETG00000000453	ENSMUSG00000021711
ENSDARG00000069497	ENSORLG00000002873	ENSXETG00000010068	ENSMUSG00000025538
ENSDARG00000007216	ENSORLG00000002875	ENSXETG00000025168	ENSMUSG00000058355
ENSDARG00000055868	ENSORLG00000002877	ENSXETG00000033365	ENSMUSG00000005846
ENSDARG00000033609	ENSORLG00000002878	ENSXETG00000019473	ENSMUSG00000027602
ENSDARG00000042777	ENSORLG00000002879	ENSXETG00000021885	ENSMUSG00000002379
ENSDARG00000077810	ENSORLG00000002884	ENSXETG00000017606	ENSMUSG00000036990
ENSDARG00000056218	ENSORLG00000002885	ENSXETG00000032292	ENSMUSG00000027692
ENSDARG00000078139	ENSORLG00000002887	ENSXETG00000001888	ENSMUSG00000020263
ENSDARG00000015033	ENSORLG00000002889	ENSXETG00000008402	ENSMUSG00000024354
ENSDARG00000052957	ENSORLG00000002890	ENSXETG00000003234	ENSMUSG00000020937
ENSDARG00000015947	ENSORLG00000002891	ENSXETG00000022834	ENSMUSG00000022324
ENSDARG00000069501	ENSORLG00000002893	ENSXETG00000007793	ENSMUSG00000040532
ENSDARG00000036482	ENSORLG00000002894	ENSXETG00000027237	ENSMUSG00000048878
ENSDARG00000031345	ENSORLG00000002897	ENSXETG00000021714	ENSMUSG00000034930
ENSDARG00000052950	ENSORLG00000002901	ENSXETG00000014740	ENSMUSG00000049807
ENSDARG00000015070	ENSORLG00000002903	ENSXETG00000023289	ENSMUSG00000024833
ENSDARG00000017235	ENSORLG00000002907	ENSXETG00000026436	ENSMUSG00000050192
ENSDARG00000061576	ENSORLG00000002908	ENSXETG00000020767	ENSMUSG00000046167
ENSDARG00000020232	ENSORLG00000002910	ENSXETG00000026867	ENSMUSG00000027613
ENSDARG00000006900	ENSORLG00000002914	ENSXETG00000009343	ENSMUSG00000062867
ENSDARG00000010244	ENSORLG00000002916	ENSXETG00000009154	ENSMUSG00000039221
ENSDARG00000028676	ENSORLG00000002921	ENSXETG00000018772	ENSMUSG00000020032
ENSDARG00000043276	ENSORLG00000002923	ENSXETG00000002832	ENSMUSG00000019732
ENSDARG00000068602	ENSORLG00000002924	ENSXETG00000009339	ENSMUSG00000019039
ENSDARG00000020984	ENSORLG00000002925	ENSXETG00000021337	ENSMUSG00000019838
ENSDARG00000031968	ENSORLG00000002926	ENSXETG00000008957	ENSMUSG00000065979
ENSDARG00000053091	ENSORLG00000002936	ENSXETG00000006761	ENSMUSG00000022150
ENSDARG00000054155	ENSORLG00000002937	ENSXETG00000008193	ENSMUSG00000067608
ENSDARG00000057867	ENSORLG00000002939	ENSXETG00000023716	ENSMUSG00000038366
ENSDARG00000020031	ENSORLG00000002943	ENSXETG00000011648	ENSMUSG00000037625
ENSDARG00000059037	ENSORLG00000002944	ENSXETG00000022273	ENSMUSG00000015365
ENSDARG00000018896	ENSORLG00000002945	ENSXETG00000002702	ENSMUSG00000027612
ENSDARG00000004891	ENSORLG00000002946	ENSXETG00000008120	ENSMUSG00000003464
ENSDARG00000014161	ENSORLG00000002948	ENSXETG00000010991	ENSMUSG00000022545
ENSDARG00000041348	ENSORLG00000002949	ENSXETG00000020758	ENSMUSG00000032274
ENSDARG00000075296	ENSORLG00000002950	ENSXETG00000019789	ENSMUSG00000074647
ENSDARG00000078571	ENSORLG00000002952	ENSXETG00000009340	ENSMUSG00000066357
ENSDARG00000088709	ENSORLG00000002956	ENSXETG00000020757	ENSMUSG00000074345
ENSDARG00000018623	ENSORLG00000002958	ENSXETG00000004369	ENSMUSG00000028702
ENSDARG00000069507	ENSORLG00000002959	ENSXETG00000007796	ENSMUSG00000040557
ENSDARG00000068176	ENSORLG00000002962	ENSXETG00000019787	ENSMUSG00000005882
ENSDARG00000015247	ENSORLG00000002966	ENSXETG00000016338	ENSMUSG00000031196
ENSDARG00000061486	ENSORLG00000002971	ENSXETG00000030188	ENSMUSG00000038011
ENSDARG00000002760	ENSORLG00000002972	ENSXETG00000021223	ENSMUSG00000038259
ENSDARG00000002980	ENSORLG00000002974	ENSXETG00000013000	ENSMUSG00000020128
ENSDARG00000077549	ENSORLG00000002975	ENSXETG00000017152	ENSMUSG00000020085
ENSDARG00000020169	ENSORLG00000002982	ENSXETG00000004339	ENSMUSG00000027371
ENSDARG00000068215	ENSORLG00000002985	ENSXETG00000016929	ENSMUSG00000022223
ENSDARG00000055835	ENSORLG00000002987	ENSXETG00000024748	ENSMUSG00000042268
ENSDARG00000086288	ENSORLG00000002989	ENSXETG00000020755	ENSMUSG00000032181
ENSDARG00000002167	ENSORLG00000002991	ENSXETG00000026334	ENSMUSG00000020882
ENSDARG00000019478	ENSORLG00000002993	ENSXETG00000007119	ENSMUSG00000031684
ENSDARG00000060482	ENSORLG00000002994	ENSXETG00000015715	ENSMUSG00000095134
ENSDARG00000008757	ENSORLG00000002995	ENSXETG00000012776	ENSMUSG00000033068
ENSDARG00000091771	ENSORLG00000002996	ENSXETG00000020754	ENSMUSG00000032184
ENSDARG00000024669	ENSORLG00000002998	ENSXETG00000027347	ENSMUSG00000035399
ENSDARG00000019239	ENSORLG00000003000	ENSXETG00000020148	ENSMUSG00000029686
ENSDARG00000090687	ENSORLG00000003001	ENSXETG00000000559	ENSMUSG00000022106
ENSDARG00000079134	ENSORLG00000003002	ENSXETG00000001747	ENSMUSG00000004561
ENSDARG00000016311	ENSORLG00000003004	ENSXETG00000023534	ENSMUSG00000025558
ENSDARG00000010301	ENSORLG00000003005	ENSXETG00000024002	ENSMUSG00000056124
ENSDARG00000013307	ENSORLG00000003007	ENSXETG00000023711	ENSMUSG00000017404
ENSDARG00000021140	ENSORLG00000003008	ENSXETG00000015439	ENSMUSG00000046173
ENSDARG00000063177	ENSORLG00000003010	ENSXETG00000000073	ENSMUSG00000032575
ENSDARG00000036820	ENSORLG00000003012	ENSXETG00000002062	ENSMUSG00000033174
ENSDARG00000062552	ENSORLG00000003013	ENSXETG00000018445	ENSMUSG00000049929
ENSDARG00000033501	ENSORLG00000003014	ENSXETG00000022572	ENSMUSG00000031431
ENSDARG00000074056	ENSORLG00000003016	ENSXETG00000006930	ENSMUSG00000036225
ENSDARG00000062797	ENSORLG00000003018	ENSXETG00000014158	ENSMUSG00000055409
ENSDARG00000004363	ENSORLG00000003019	ENSXETG00000012860	ENSMUSG00000048332
ENSDARG00000017422	ENSORLG00000003030	ENSXETG00000012773	ENSMUSG00000033096
ENSDARG00000013794	ENSORLG00000003032	ENSXETG00000007013	ENSMUSG00000020653
ENSDARG00000063244	ENSORLG00000003036	ENSXETG00000014034	ENSMUSG00000049288
ENSDARG00000078789	ENSORLG00000003037	ENSXETG00000007110	ENSMUSG00000031617
ENSDARG00000077563	ENSORLG00000003042	ENSXETG00000003391	ENSMUSG00000034520
ENSDARG00000088356	ENSORLG00000003044	ENSXETG00000006813	ENSMUSG00000063296
ENSDARG00000002571	ENSORLG00000003045	ENSXETG00000020749	ENSMUSG00000058587
ENSDARG00000089124	ENSORLG00000003046	ENSXETG00000030564	ENSMUSG00000055609
ENSDARG00000075204	ENSORLG00000003047	ENSXETG00000032541	ENSMUSG00000074736
ENSDARG00000030094	ENSORLG00000003048	ENSXETG00000022442	ENSMUSG00000027375
ENSDARG00000033635	ENSORLG00000003050	ENSXETG00000008127	ENSMUSG00000035528
ENSDARG00000074894	ENSORLG00000003057	ENSXETG00000019146	ENSMUSG00000046312
ENSDARG00000024026	ENSORLG00000003058	ENSXETG00000027007	ENSMUSG00000002064
ENSDARG00000018574	ENSORLG00000003062	ENSXETG00000011038	ENSMUSG00000068856
ENSDARG00000033184	ENSORLG00000003063	ENSXETG00000009330	ENSMUSG00000032601
ENSDARG00000055357	ENSORLG00000003064	ENSXETG00000020746	ENSMUSG00000042487
ENSDARG00000010571	ENSORLG00000003066	ENSXETG00000020146	ENSMUSG00000029687
ENSDARG00000035869	ENSORLG00000003069	ENSXETG00000004118	ENSMUSG00000037458
ENSDARG00000045140	ENSORLG00000003071	ENSXETG00000027013	ENSMUSG00000030763
ENSDARG00000013730	ENSORLG00000003072	ENSXETG00000020880	ENSMUSG00000024485
ENSDARG00000038713	ENSORLG00000003075	ENSXETG00000001751	ENSMUSG00000006281
ENSDARG00000086810	ENSORLG00000003076	ENSXETG00000022941	ENSMUSG00000014850
ENSDARG00000062122	ENSORLG00000003079	ENSXETG00000015861	ENSMUSG00000025597
ENSDARG00000032103	ENSORLG00000003082	ENSXETG00000020744	ENSMUSG00000024558
ENSDARG00000007425	ENSORLG00000003084	ENSXETG00000011813	ENSMUSG00000068252
ENSDARG00000029695	ENSORLG00000003089	ENSXETG00000016097	ENSMUSG00000043445
ENSDARG00000059945	ENSORLG00000003092	ENSXETG00000032522	ENSMUSG00000053025
ENSDARG00000012336	ENSORLG00000003093	ENSXETG00000016035	ENSMUSG00000027742
ENSDARG00000088026	ENSORLG00000003102	ENSXETG00000019512	ENSMUSG00000046207
ENSDARG00000086407	ENSORLG00000003104	ENSXETG00000009395	ENSMUSG00000028082
ENSDARG00000011661	ENSORLG00000003106	ENSXETG00000026830	ENSMUSG00000022451
ENSDARG00000044807	ENSORLG00000003108	ENSXETG00000023649	ENSMUSG00000029366
ENSDARG00000012261	ENSORLG00000003109	ENSXETG00000003394	ENSMUSG00000020929
ENSDARG00000003287	ENSORLG00000003110	ENSXETG00000022077	ENSMUSG00000026019
ENSDARG00000023967	ENSORLG00000003111	ENSXETG00000003516	ENSMUSG00000022295
ENSDARG00000003167	ENSORLG00000003112	ENSXETG00000016102	ENSMUSG00000024142
ENSDARG00000061021	ENSORLG00000003113	ENSXETG00000009392	ENSMUSG00000051000
ENSDARG00000058260	ENSORLG00000003114	ENSXETG00000016139	ENSMUSG00000033031
ENSDARG00000008403	ENSORLG00000003115	ENSXETG00000018643	ENSMUSG00000050860
ENSDARG00000073975	ENSORLG00000003116	ENSXETG00000018504	ENSMUSG00000040327
ENSDARG00000063539	ENSORLG00000003117	ENSXETG00000027202	ENSMUSG00000031482
ENSDARG00000062442	ENSORLG00000003120	ENSXETG00000032247	ENSMUSG00000024155
ENSDARG00000059948	ENSORLG00000003124	ENSXETG00000007214	ENSMUSG00000039628
ENSDARG00000010862	ENSORLG00000003127	ENSXETG00000005937	ENSMUSG00000032607
ENSDARG00000056119	ENSORLG00000003130	ENSXETG00000026372	ENSMUSG00000071644
ENSDARG00000010657	ENSORLG00000003134	ENSXETG00000006811	ENSMUSG00000059883
ENSDARG00000062446	ENSORLG00000003138	ENSXETG00000014872	ENSMUSG00000039873
ENSDARG00000041311	ENSORLG00000003141	ENSXETG00000019532	ENSMUSG00000020903
ENSDARG00000076496	ENSORLG00000003143	ENSXETG00000016169	ENSMUSG00000030064
ENSDARG00000032630	ENSORLG00000003147	ENSXETG00000004531	ENSMUSG00000026950
ENSDARG00000057414	ENSORLG00000003148	ENSXETG00000027802	ENSMUSG00000038845
ENSDARG00000057035	ENSORLG00000003151	ENSXETG00000016014	ENSMUSG00000027744
ENSDARG00000056127	ENSORLG00000003154	ENSXETG00000006022	ENSMUSG00000071662
ENSDARG00000035868	ENSORLG00000003158	ENSXETG00000011265	ENSMUSG00000024533
ENSDARG00000069339	ENSORLG00000003161	ENSXETG00000020284	ENSMUSG00000036473
ENSDARG00000058337	ENSORLG00000003162	ENSXETG00000022073	ENSMUSG00000026020
ENSDARG00000075297	ENSORLG00000003165	ENSXETG00000025091	ENSMUSG00000013736
ENSDARG00000024940	ENSORLG00000003166	ENSXETG00000014170	ENSMUSG00000038068
ENSDARG00000074984	ENSORLG00000003169	ENSXETG00000005518	ENSMUSG00000029651
ENSDARG00000002002	ENSORLG00000003170	ENSXETG00000015748	ENSMUSG00000029552
ENSDARG00000038900	ENSORLG00000003172	ENSXETG00000002983	ENSMUSG00000062908
ENSDARG00000030166	ENSORLG00000003173	ENSXETG00000002253	ENSMUSG00000006395
ENSDARG00000056481	ENSORLG00000003177	ENSXETG00000014900	ENSMUSG00000034993
ENSDARG00000040518	ENSORLG00000003179	ENSXETG00000020431	ENSMUSG00000021427
ENSDARG00000039820	ENSORLG00000003180	ENSXETG00000030553	ENSMUSG00000002768
ENSDARG00000038239	ENSORLG00000003182	ENSXETG00000004771	ENSMUSG00000031691
ENSDARG00000063411	ENSORLG00000003187	ENSXETG00000030034	ENSMUSG00000071073
ENSDARG00000079482	ENSORLG00000003188	ENSXETG00000012151	ENSMUSG00000018415
ENSDARG00000015911	ENSORLG00000003191	ENSXETG00000002059	ENSMUSG00000002870
ENSDARG00000077778	ENSORLG00000003194	ENSXETG00000018447	ENSMUSG00000022449
ENSDARG00000079946	ENSORLG00000003196	ENSXETG00000023050	ENSMUSG00000022351
ENSDARG00000041321	ENSORLG00000003197	ENSXETG00000019539	ENSMUSG00000020904
ENSDARG00000056270	ENSORLG00000003200	ENSXETG00000012153	ENSMUSG00000042709
ENSDARG00000037018	ENSORLG00000003201	ENSXETG00000017549	ENSMUSG00000031714
ENSDARG00000063713	ENSORLG00000003202	ENSXETG00000020358	ENSMUSG00000067629
ENSDARG00000052073	ENSORLG00000003205	ENSXETG00000025511	ENSMUSG00000067787
ENSDARG00000038306	ENSORLG00000003208	ENSXETG00000014776	ENSMUSG00000022010
ENSDARG00000063310	ENSORLG00000003220	ENSXETG00000006499	ENSMUSG00000022307
ENSDARG00000036811	ENSORLG00000003221	ENSXETG00000007325	ENSMUSG00000010048
ENSDARG00000038905	ENSORLG00000003223	ENSXETG00000003504	ENSMUSG00000046861
ENSDARG00000052764	ENSORLG00000003226	ENSXETG00000010250	ENSMUSG00000031492
ENSDARG00000020979	ENSORLG00000003227	ENSXETG00000012297	ENSMUSG00000074577
ENSDARG00000040649	ENSORLG00000003229	ENSXETG00000006797	ENSMUSG00000036158
ENSDARG00000070504	ENSORLG00000003233	ENSXETG00000012403	ENSMUSG00000041710
ENSDARG00000078703	ENSORLG00000003235	ENSXETG00000021644	ENSMUSG00000028207
ENSDARG00000022525	ENSORLG00000003236	ENSXETG00000030265	ENSMUSG00000050164
ENSDARG00000040123	ENSORLG00000003240	ENSXETG00000006505	ENSMUSG00000022306
ENSDARG00000045692	ENSORLG00000003241	ENSXETG00000026823	ENSMUSG00000036167
ENSDARG00000035388	ENSORLG00000003242	ENSXETG00000016816	ENSMUSG00000046082
ENSDARG00000055559	ENSORLG00000003243	ENSXETG00000010249	ENSMUSG00000031491
ENSDARG00000009217	ENSORLG00000003244	ENSXETG00000004317	ENSMUSG00000000538
ENSDARG00000029179	ENSORLG00000003247	ENSXETG00000016818	ENSMUSG00000078302
ENSDARG00000014391	ENSORLG00000003251	ENSXETG00000025045	ENSMUSG00000022311
ENSDARG00000074969	ENSORLG00000003252	ENSXETG00000004032	ENSMUSG00000022707
ENSDARG00000036239	ENSORLG00000003253	ENSXETG00000016109	ENSMUSG00000027199
ENSDARG00000068082	ENSORLG00000003254	ENSXETG00000018896	ENSMUSG00000022023
ENSDARG00000015966	ENSORLG00000003255	ENSXETG00000006795	ENSMUSG00000022634
ENSDARG00000090338	ENSORLG00000003261	ENSXETG00000001395	ENSMUSG00000025854
ENSDARG00000070495	ENSORLG00000003263	ENSXETG00000005416	ENSMUSG00000036131
ENSDARG00000062633	ENSORLG00000003268	ENSXETG00000026489	ENSMUSG00000064115
ENSDARG00000021439	ENSORLG00000003269	ENSXETG00000032751	ENSMUSG00000056234
ENSDARG00000011672	ENSORLG00000003270	ENSXETG00000007320	ENSMUSG00000057969
ENSDARG00000068028	ENSORLG00000003272	ENSXETG00000016286	ENSMUSG00000038679
ENSDARG00000068587	ENSORLG00000003274	ENSXETG00000002979	ENSMUSG00000038975
ENSDARG00000053456	ENSORLG00000003276	ENSXETG00000018610	ENSMUSG00000053624
ENSDARG00000035399	ENSORLG00000003277	ENSXETG00000016820	ENSMUSG00000021661
ENSDARG00000071509	ENSORLG00000003278	ENSXETG00000000546	ENSMUSG00000045312
ENSDARG00000046062	ENSORLG00000003279	ENSXETG00000012516	ENSMUSG00000020738
ENSDARG00000004280	ENSORLG00000003280	ENSXETG00000019668	ENSMUSG00000079614
ENSDARG00000090442	ENSORLG00000003282	ENSXETG00000020075	ENSMUSG00000045482
ENSDARG00000078135	ENSORLG00000003284	ENSXETG00000005331	ENSMUSG00000020695
ENSDARG00000017244	ENSORLG00000003286	ENSXETG00000021445	ENSMUSG00000057133
ENSDARG00000045455	ENSORLG00000003287	ENSXETG00000031776	ENSMUSG00000021420
ENSDARG00000035398	ENSORLG00000003288	ENSXETG00000007622	ENSMUSG00000041773
ENSDARG00000055426	ENSORLG00000003293	ENSXETG00000022672	ENSMUSG00000041079
ENSDARG00000062055	ENSORLG00000003296	ENSXETG00000006554	ENSMUSG00000035696
ENSDARG00000060805	ENSORLG00000003304	ENSXETG00000004910	ENSMUSG00000019261
ENSDARG00000045685	ENSORLG00000003308	ENSXETG00000015810	ENSMUSG00000055022
ENSDARG00000077222	ENSORLG00000003309	ENSXETG00000020076	ENSMUSG00000043388
ENSDARG00000010779	ENSORLG00000003312	ENSXETG00000007854	ENSMUSG00000020694
ENSDARG00000074974	ENSORLG00000003313	ENSXETG00000019662	ENSMUSG00000024542
ENSDARG00000041991	ENSORLG00000003315	ENSXETG00000030671	ENSMUSG00000041506
ENSDARG00000075957	ENSORLG00000003317	ENSXETG00000023799	ENSMUSG00000038290
ENSDARG00000024479	ENSORLG00000003318	ENSXETG00000002970	ENSMUSG00000039047
ENSDARG00000020187	ENSORLG00000003319	ENSXETG00000013175	ENSMUSG00000026893
ENSDARG00000008105	ENSORLG00000003321	ENSXETG00000007856	ENSMUSG00000041975
ENSDARG00000012555	ENSORLG00000003322	ENSXETG00000021999	ENSMUSG00000039058
ENSDARG00000034368	ENSORLG00000003323	ENSXETG00000005075	ENSMUSG00000021665
ENSDARG00000054941	ENSORLG00000003324	ENSXETG00000011263	ENSMUSG00000038400
ENSDARG00000060390	ENSORLG00000003325	ENSXETG00000005418	ENSMUSG00000031112
ENSDARG00000076077	ENSORLG00000003326	ENSXETG00000023819	ENSMUSG00000038268
ENSDARG00000076847	ENSORLG00000003327	ENSXETG00000019470	ENSMUSG00000025571
ENSDARG00000071465	ENSORLG00000003329	ENSXETG00000013208	ENSMUSG00000027961
ENSDARG00000055578	ENSORLG00000003331	ENSXETG00000013534	ENSMUSG00000045287
ENSDARG00000060633	ENSORLG00000003334	ENSXETG00000020255	ENSMUSG00000025616
ENSDARG00000062553	ENSORLG00000003339	ENSXETG00000020266	ENSMUSG00000025612
ENSDARG00000015572	ENSORLG00000003345	ENSXETG00000026635	ENSMUSG00000017421
ENSDARG00000029307	ENSORLG00000003346	ENSXETG00000010060	ENSMUSG00000024410
ENSDARG00000061379	ENSORLG00000003348	ENSXETG00000016103	ENSMUSG00000047419
ENSDARG00000070164	ENSORLG00000003350	ENSXETG00000000961	ENSMUSG00000027272
ENSDARG00000040109	ENSORLG00000003352	ENSXETG00000013210	ENSMUSG00000000340
ENSDARG00000062687	ENSORLG00000003353	ENSXETG00000013171	ENSMUSG00000001901
ENSDARG00000031119	ENSORLG00000003355	ENSXETG00000024036	ENSMUSG00000038859
ENSDARG00000042909	ENSORLG00000003358	ENSXETG00000013223	ENSMUSG00000022146
ENSDARG00000005561	ENSORLG00000003360	ENSXETG00000005076	ENSMUSG00000021666
ENSDARG00000040627	ENSORLG00000003362	ENSXETG00000011804	ENSMUSG00000022935
ENSDARG00000061622	ENSORLG00000003367	ENSXETG00000033625	ENSMUSG00000045053
ENSDARG00000003938	ENSORLG00000003368	ENSXETG00000013538	ENSMUSG00000000751
ENSDARG00000019258	ENSORLG00000003371	ENSXETG00000007361	ENSMUSG00000017670
ENSDARG00000039229	ENSORLG00000003373	ENSXETG00000003622	ENSMUSG00000041491
ENSDARG00000040628	ENSORLG00000003376	ENSXETG00000031350	ENSMUSG00000050520
ENSDARG00000007708	ENSORLG00000003379	ENSXETG00000005077	ENSMUSG00000060739
ENSDARG00000013420	ENSORLG00000003381	ENSXETG00000021121	ENSMUSG00000032239
ENSDARG00000078745	ENSORLG00000003382	ENSXETG00000015758	ENSMUSG00000036257
ENSDARG00000060983	ENSORLG00000003385	ENSXETG00000013541	ENSMUSG00000018809
ENSDARG00000039910	ENSORLG00000003387	ENSXETG00000017599	ENSMUSG00000036733
ENSDARG00000054575	ENSORLG00000003388	ENSXETG00000009683	ENSMUSG00000096606
ENSDARG00000045070	ENSORLG00000003389	ENSXETG00000019163	ENSMUSG00000020689
ENSDARG00000012745	ENSORLG00000003394	ENSXETG00000006191	ENSMUSG00000021903
ENSDARG00000042751	ENSORLG00000003395	ENSXETG00000027370	ENSMUSG00000024404
ENSDARG00000056768	ENSORLG00000003396	ENSXETG00000019162	ENSMUSG00000046215
ENSDARG00000007344	ENSORLG00000003399	ENSXETG00000015144	ENSMUSG00000007877
ENSDARG00000079772	ENSORLG00000003400	ENSXETG00000019166	ENSMUSG00000066551
ENSDARG00000045166	ENSORLG00000003401	ENSXETG00000032164	ENSMUSG00000052271
ENSDARG00000077950	ENSORLG00000003403	ENSXETG00000023595	ENSMUSG00000026848
ENSDARG00000034825	ENSORLG00000003406	ENSXETG00000019167	ENSMUSG00000041264
ENSDARG00000055490	ENSORLG00000003408	ENSXETG00000027025	ENSMUSG00000039774
ENSDARG00000039882	ENSORLG00000003409	ENSXETG00000012972	ENSMUSG00000024480
ENSDARG00000011076	ENSORLG00000003410	ENSXETG00000010902	ENSMUSG00000039395
ENSDARG00000062744	ENSORLG00000003411	ENSXETG00000021004	ENSMUSG00000057182
ENSDARG00000054755	ENSORLG00000003412	ENSXETG00000026001	ENSMUSG00000060063
ENSDARG00000070187	ENSORLG00000003415	ENSXETG00000032961	ENSMUSG00000002409
ENSDARG00000043376	ENSORLG00000003417	ENSXETG00000005220	ENSMUSG00000026921
ENSDARG00000053122	ENSORLG00000003419	ENSXETG00000023298	ENSMUSG00000019785
ENSDARG00000077093	ENSORLG00000003420	ENSXETG00000007351	ENSMUSG00000022983
ENSDARG00000061042	ENSORLG00000003422	ENSXETG00000018917	ENSMUSG00000039809
ENSDARG00000055938	ENSORLG00000003423	ENSXETG00000003514	ENSMUSG00000037824
ENSDARG00000008662	ENSORLG00000003424	ENSXETG00000014114	ENSMUSG00000075324
ENSDARG00000001880	ENSORLG00000003426	ENSXETG00000023730	ENSMUSG00000041488
ENSDARG00000025200	ENSORLG00000003428	ENSXETG00000017673	ENSMUSG00000062729
ENSDARG00000056559	ENSORLG00000003430	ENSXETG00000024053	ENSMUSG00000029617
ENSDARG00000017809	ENSORLG00000003431	ENSXETG00000015141	ENSMUSG00000018167
ENSDARG00000077740	ENSORLG00000003432	ENSXETG00000019184	ENSMUSG00000051950
ENSDARG00000068437	ENSORLG00000003435	ENSXETG00000005222	ENSMUSG00000026922
ENSDARG00000087043	ENSORLG00000003436	ENSXETG00000009895	ENSMUSG00000039929
ENSDARG00000076280	ENSORLG00000003438	ENSXETG00000032146	ENSMUSG00000061718
ENSDARG00000052700	ENSORLG00000003439	ENSXETG00000021321	ENSMUSG00000037994
ENSDARG00000075154	ENSORLG00000003440	ENSXETG00000006118	ENSMUSG00000034780
ENSDARG00000016163	ENSORLG00000003442	ENSXETG00000013118	ENSMUSG00000025437
ENSDARG00000055643	ENSORLG00000003443	ENSXETG00000023560	ENSMUSG00000024646
ENSDARG00000045167	ENSORLG00000003444	ENSXETG00000015731	ENSMUSG00000037544
ENSDARG00000017199	ENSORLG00000003446	ENSXETG00000018920	ENSMUSG00000024271
ENSDARG00000043028	ENSORLG00000003447	ENSXETG00000018720	ENSMUSG00000019647
ENSDARG00000057026	ENSORLG00000003452	ENSXETG00000027832	ENSMUSG00000083649
ENSDARG00000070078	ENSORLG00000003454	ENSXETG00000016210	ENSMUSG00000027048
ENSDARG00000058038	ENSORLG00000003456	ENSXETG00000005628	ENSMUSG00000071647
ENSDARG00000076791	ENSORLG00000003457	ENSXETG00000013107	ENSMUSG00000041297
ENSDARG00000018162	ENSORLG00000003458	ENSXETG00000018934	ENSMUSG00000038816
ENSDARG00000059806	ENSORLG00000003459	ENSXETG00000011975	ENSMUSG00000025240
ENSDARG00000018130	ENSORLG00000003461	ENSXETG00000020040	ENSMUSG00000017686
ENSDARG00000070407	ENSORLG00000003464	ENSXETG00000027667	ENSMUSG00000038827
ENSDARG00000077121	ENSORLG00000003465	ENSXETG00000021546	ENSMUSG00000063415
ENSDARG00000037559	ENSORLG00000003466	ENSXETG00000010202	ENSMUSG00000069053
ENSDARG00000056664	ENSORLG00000003468	ENSXETG00000016435	ENSMUSG00000030881
ENSDARG00000013975	ENSORLG00000003469	ENSXETG00000023804	ENSMUSG00000025089
ENSDARG00000002305	ENSORLG00000003470	ENSXETG00000010436	ENSMUSG00000032418
ENSDARG00000020596	ENSORLG00000003471	ENSXETG00000013134	ENSMUSG00000054942
ENSDARG00000056984	ENSORLG00000003473	ENSXETG00000015759	ENSMUSG00000024824
ENSDARG00000019596	ENSORLG00000003474	ENSXETG00000008054	ENSMUSG00000053510
ENSDARG00000055649	ENSORLG00000003475	ENSXETG00000019687	ENSMUSG00000001473
ENSDARG00000058448	ENSORLG00000003476	ENSXETG00000031542	ENSMUSG00000031370
ENSDARG00000075567	ENSORLG00000003477	ENSXETG00000023700	ENSMUSG00000020883
ENSDARG00000019260	ENSORLG00000003479	ENSXETG00000025417	ENSMUSG00000040127
ENSDARG00000043209	ENSORLG00000003480	ENSXETG00000010332	ENSMUSG00000000916
ENSDARG00000054340	ENSORLG00000003484	ENSXETG00000010985	ENSMUSG00000022372
ENSDARG00000058504	ENSORLG00000003485	ENSXETG00000022468	ENSMUSG00000031367
ENSDARG00000075672	ENSORLG00000003486	ENSXETG00000024066	ENSMUSG00000079109
ENSDARG00000061267	ENSORLG00000003488	ENSXETG00000019690	ENSMUSG00000024526
ENSDARG00000070565	ENSORLG00000003490	ENSXETG00000027954	ENSMUSG00000020709
ENSDARG00000074004	ENSORLG00000003491	ENSXETG00000004974	ENSMUSG00000032502
ENSDARG00000063370	ENSORLG00000003494	ENSXETG00000012119	ENSMUSG00000017868
ENSDARG00000059469	ENSORLG00000003496	ENSXETG00000020052	ENSMUSG00000046909
ENSDARG00000006420	ENSORLG00000003498	ENSXETG00000023806	ENSMUSG00000054843
ENSDARG00000093182	ENSORLG00000003499	ENSXETG00000024055	ENSMUSG00000029613
ENSDARG00000062402	ENSORLG00000003500	ENSXETG00000008875	ENSMUSG00000059049
ENSDARG00000061380	ENSORLG00000003501	ENSXETG00000015679	ENSMUSG00000076430
ENSDARG00000005397	ENSORLG00000003504	ENSXETG00000004691	ENSMUSG00000036989
ENSDARG00000060235	ENSORLG00000003505	ENSXETG00000007306	ENSMUSG00000032584
ENSDARG00000056743	ENSORLG00000003506	ENSXETG00000014979	ENSMUSG00000028348
ENSDARG00000005085	ENSORLG00000003509	ENSXETG00000022014	ENSMUSG00000002797
ENSDARG00000014828	ENSORLG00000003513	ENSXETG00000012115	ENSMUSG00000035576
ENSDARG00000056740	ENSORLG00000003514	ENSXETG00000027666	ENSMUSG00000028347
ENSDARG00000027963	ENSORLG00000003516	ENSXETG00000007311	ENSMUSG00000032936
ENSDARG00000070083	ENSORLG00000003517	ENSXETG00000024665	ENSMUSG00000025393
ENSDARG00000028442	ENSORLG00000003519	ENSXETG00000013449	ENSMUSG00000073733
ENSDARG00000074369	ENSORLG00000003520	ENSXETG00000015989	ENSMUSG00000037016
ENSDARG00000079881	ENSORLG00000003521	ENSXETG00000005361	ENSMUSG00000046603
ENSDARG00000005159	ENSORLG00000003522	ENSXETG00000024063	ENSMUSG00000018001
ENSDARG00000013478	ENSORLG00000003526	ENSXETG00000032988	ENSMUSG00000001305
ENSDARG00000074849	ENSORLG00000003527	ENSXETG00000027593	ENSMUSG00000001847
ENSDARG00000069928	ENSORLG00000003528	ENSXETG00000022951	ENSMUSG00000045038
ENSDARG00000013729	ENSORLG00000003530	ENSXETG00000025503	ENSMUSG00000028911
ENSDARG00000016994	ENSORLG00000003532	ENSXETG00000000781	ENSMUSG00000027067
ENSDARG00000023299	ENSORLG00000003534	ENSXETG00000026024	ENSMUSG00000063480
ENSDARG00000079204	ENSORLG00000003537	ENSXETG00000003388	ENSMUSG00000020926
ENSDARG00000076140	ENSORLG00000003538	ENSXETG00000020877	ENSMUSG00000040663
ENSDARG00000036376	ENSORLG00000003539	ENSXETG00000007574	ENSMUSG00000018569
ENSDARG00000029248	ENSORLG00000003540	ENSXETG00000013137	ENSMUSG00000028034
ENSDARG00000062183	ENSORLG00000003541	ENSXETG00000001811	ENSMUSG00000027748
ENSDARG00000056888	ENSORLG00000003542	ENSXETG00000014981	ENSMUSG00000022262
ENSDARG00000022727	ENSORLG00000003543	ENSXETG00000021731	ENSMUSG00000029859
ENSDARG00000035730	ENSORLG00000003546	ENSXETG00000020057	ENSMUSG00000035575
ENSDARG00000006757	ENSORLG00000003547	ENSXETG00000018861	ENSMUSG00000075307
ENSDARG00000053047	ENSORLG00000003548	ENSXETG00000019507	ENSMUSG00000052825
ENSDARG00000060153	ENSORLG00000003550	ENSXETG00000012078	ENSMUSG00000028980
ENSDARG00000035709	ENSORLG00000003553	ENSXETG00000021249	ENSMUSG00000038194
ENSDARG00000038219	ENSORLG00000003554	ENSXETG00000012848	ENSMUSG00000075415
ENSDARG00000030687	ENSORLG00000003555	ENSXETG00000006756	ENSMUSG00000031295
ENSDARG00000057946	ENSORLG00000003556	ENSXETG00000002284	ENSMUSG00000006931
ENSDARG00000032849	ENSORLG00000003558	ENSXETG00000010988	ENSMUSG00000005125
ENSDARG00000053855	ENSORLG00000003560	ENSXETG00000021918	ENSMUSG00000017639
ENSDARG00000007323	ENSORLG00000003562	ENSXETG00000021424	ENSMUSG00000038467
ENSDARG00000067546	ENSORLG00000003565	ENSXETG00000026242	ENSMUSG00000049687
ENSDARG00000070485	ENSORLG00000003570	ENSXETG00000022169	ENSMUSG00000073705
ENSDARG00000024964	ENSORLG00000003573	ENSXETG00000032182	ENSMUSG00000061859
ENSDARG00000058528	ENSORLG00000003576	ENSXETG00000005363	ENSMUSG00000056167
ENSDARG00000044600	ENSORLG00000003578	ENSXETG00000007925	ENSMUSG00000040563
ENSDARG00000038978	ENSORLG00000003581	ENSXETG00000013144	ENSMUSG00000028035
ENSDARG00000061219	ENSORLG00000003583	ENSXETG00000001812	ENSMUSG00000027750
ENSDARG00000027236	ENSORLG00000003584	ENSXETG00000010360	ENSMUSG00000031293
ENSDARG00000009488	ENSORLG00000003587	ENSXETG00000013148	ENSMUSG00000039131
ENSDARG00000043601	ENSORLG00000003588	ENSXETG00000016731	ENSMUSG00000013822
ENSDARG00000077329	ENSORLG00000003589	ENSXETG00000023971	ENSMUSG00000051790
ENSDARG00000056949	ENSORLG00000003592	ENSXETG00000031961	ENSMUSG00000024798
ENSDARG00000040031	ENSORLG00000003593	ENSXETG00000006317	ENSMUSG00000041459
ENSDARG00000070435	ENSORLG00000003596	ENSXETG00000002437	ENSMUSG00000054455
ENSDARG00000015240	ENSORLG00000003597	ENSXETG00000021807	ENSMUSG00000031292
ENSDARG00000059951	ENSORLG00000003598	ENSXETG00000005747	ENSMUSG00000043648
ENSDARG00000071691	ENSORLG00000003601	ENSXETG00000016693	ENSMUSG00000030884
ENSDARG00000058597	ENSORLG00000003605	ENSXETG00000002290	ENSMUSG00000029780
ENSDARG00000052897	ENSORLG00000003606	ENSXETG00000020912	ENSMUSG00000032637
ENSDARG00000061211	ENSORLG00000003609	ENSXETG00000032577	ENSMUSG00000036580
ENSDARG00000090454	ENSORLG00000003613	ENSXETG00000009466	ENSMUSG00000029064
ENSDARG00000045130	ENSORLG00000003614	ENSXETG00000032476	ENSMUSG00000048732
ENSDARG00000035837	ENSORLG00000003616	ENSXETG00000016695	ENSMUSG00000046096
ENSDARG00000007786	ENSORLG00000003620	ENSXETG00000026417	ENSMUSG00000071035
ENSDARG00000075621	ENSORLG00000003623	ENSXETG00000009983	ENSMUSG00000017716
ENSDARG00000015006	ENSORLG00000003624	ENSXETG00000012252	ENSMUSG00000022789
ENSDARG00000018107	ENSORLG00000003625	ENSXETG00000027219	ENSMUSG00000019066
ENSDARG00000028082	ENSORLG00000003628	ENSXETG00000011682	ENSMUSG00000029454
ENSDARG00000070722	ENSORLG00000003629	ENSXETG00000008056	ENSMUSG00000028568
ENSDARG00000079457	ENSORLG00000003631	ENSXETG00000015035	ENSMUSG00000025384
ENSDARG00000014571	ENSORLG00000003634	ENSXETG00000013848	ENSMUSG00000006932
ENSDARG00000031855	ENSORLG00000003636	ENSXETG00000005949	ENSMUSG00000032591
ENSDARG00000079502	ENSORLG00000003639	ENSXETG00000032419	ENSMUSG00000094651
ENSDARG00000068635	ENSORLG00000003640	ENSXETG00000022329	ENSMUSG00000035772
ENSDARG00000023701	ENSORLG00000003641	ENSXETG00000008057	ENSMUSG00000034557
ENSDARG00000045096	ENSORLG00000003643	ENSXETG00000005449	ENSMUSG00000024725
ENSDARG00000023880	ENSORLG00000003645	ENSXETG00000000088	ENSMUSG00000042073
ENSDARG00000063663	ENSORLG00000003647	ENSXETG00000007088	ENSMUSG00000027079
ENSDARG00000059881	ENSORLG00000003651	ENSXETG00000022320	ENSMUSG00000036186
ENSDARG00000058953	ENSORLG00000003652	ENSXETG00000010958	ENSMUSG00000032849
ENSDARG00000074396	ENSORLG00000003653	ENSXETG00000015030	ENSMUSG00000025380
ENSDARG00000045461	ENSORLG00000003659	ENSXETG00000032831	ENSMUSG00000021416
ENSDARG00000043094	ENSORLG00000003661	ENSXETG00000024188	ENSMUSG00000027523
ENSDARG00000076874	ENSORLG00000003663	ENSXETG00000022025	ENSMUSG00000032540
ENSDARG00000086150	ENSORLG00000003664	ENSXETG00000014943	ENSMUSG00000041346
ENSDARG00000070826	ENSORLG00000003667	ENSXETG00000023616	ENSMUSG00000038871
ENSDARG00000011299	ENSORLG00000003670	ENSXETG00000002419	ENSMUSG00000026577
ENSDARG00000074976	ENSORLG00000003672	ENSXETG00000017114	ENSMUSG00000027797
ENSDARG00000080009	ENSORLG00000003674	ENSXETG00000015028	ENSMUSG00000039741
ENSDARG00000079862	ENSORLG00000003675	ENSXETG00000016972	ENSMUSG00000058488
ENSDARG00000042277	ENSORLG00000003683	ENSXETG00000031645	ENSMUSG00000003934
ENSDARG00000040535	ENSORLG00000003687	ENSXETG00000004463	ENSMUSG00000036356
ENSDARG00000040910	ENSORLG00000003688	ENSXETG00000010829	ENSMUSG00000022900
ENSDARG00000077081	ENSORLG00000003692	ENSXETG00000015401	ENSMUSG00000061306
ENSDARG00000089756	ENSORLG00000003694	ENSXETG00000027753	ENSMUSG00000019842
ENSDARG00000044488	ENSORLG00000003698	ENSXETG00000001072	ENSMUSG00000038683
ENSDARG00000003931	ENSORLG00000003701	ENSXETG00000023561	ENSMUSG00000056162
ENSDARG00000075180	ENSORLG00000003703	ENSXETG00000015964	ENSMUSG00000021361
ENSDARG00000075263	ENSORLG00000003705	ENSXETG00000021783	ENSMUSG00000067653
ENSDARG00000062754	ENSORLG00000003708	ENSXETG00000001846	ENSMUSG00000022212
ENSDARG00000055969	ENSORLG00000003709	ENSXETG00000016918	ENSMUSG00000033970
ENSDARG00000017738	ENSORLG00000003711	ENSXETG00000002292	ENSMUSG00000020917
ENSDARG00000079790	ENSORLG00000003714	ENSXETG00000000375	ENSMUSG00000021759
ENSDARG00000070643	ENSORLG00000003717	ENSXETG00000023015	ENSMUSG00000002845
ENSDARG00000052875	ENSORLG00000003718	ENSXETG00000007331	ENSMUSG00000010054
ENSDARG00000071007	ENSORLG00000003721	ENSXETG00000032043	ENSMUSG00000033623
ENSDARG00000060393	ENSORLG00000003723	ENSXETG00000024468	ENSMUSG00000042436
ENSDARG00000055115	ENSORLG00000003725	ENSXETG00000015432	ENSMUSG00000057531
ENSDARG00000061417	ENSORLG00000003729	ENSXETG00000020986	ENSMUSG00000028954
ENSDARG00000090531	ENSORLG00000003730	ENSXETG00000002294	ENSMUSG00000006784
ENSDARG00000043226	ENSORLG00000003734	ENSXETG00000016718	ENSMUSG00000001911
ENSDARG00000062942	ENSORLG00000003735	ENSXETG00000008490	ENSMUSG00000047976
ENSDARG00000003511	ENSORLG00000003736	ENSXETG00000001845	ENSMUSG00000032563
ENSDARG00000037713	ENSORLG00000003737	ENSXETG00000021365	ENSMUSG00000071533
ENSDARG00000010149	ENSORLG00000003740	ENSXETG00000002315	ENSMUSG00000025428
ENSDARG00000078817	ENSORLG00000003744	ENSXETG00000034153	ENSMUSG00000025427
ENSDARG00000061194	ENSORLG00000003746	ENSXETG00000031534	ENSMUSG00000041180
ENSDARG00000004840	ENSORLG00000003748	ENSXETG00000007332	ENSMUSG00000010067
ENSDARG00000009336	ENSORLG00000003752	ENSXETG00000001474	ENSMUSG00000001864
ENSDARG00000045415	ENSORLG00000003754	ENSXETG00000019702	ENSMUSG00000024524
ENSDARG00000043260	ENSORLG00000003755	ENSXETG00000031184	ENSMUSG00000035769
ENSDARG00000017397	ENSORLG00000003759	ENSXETG00000014492	ENSMUSG00000032481
ENSDARG00000037777	ENSORLG00000003763	ENSXETG00000019290	ENSMUSG00000026201
ENSDARG00000087352	ENSORLG00000003766	ENSXETG00000021393	ENSMUSG00000005237
ENSDARG00000019644	ENSORLG00000003767	ENSXETG00000016974	ENSMUSG00000030246
ENSDARG00000062209	ENSORLG00000003768	ENSXETG00000022440	ENSMUSG00000027374
ENSDARG00000088486	ENSORLG00000003770	ENSXETG00000017331	ENSMUSG00000052922
ENSDARG00000074638	ENSORLG00000003772	ENSXETG00000030605	ENSMUSG00000032818
ENSDARG00000062530	ENSORLG00000003774	ENSXETG00000002328	ENSMUSG00000032567
ENSDARG00000002406	ENSORLG00000003775	ENSXETG00000007334	ENSMUSG00000010044
ENSDARG00000091603	ENSORLG00000003776	ENSXETG00000016721	ENSMUSG00000034041
ENSDARG00000021032	ENSORLG00000003779	ENSXETG00000010836	ENSMUSG00000067261
ENSDARG00000059775	ENSORLG00000003782	ENSXETG00000025497	ENSMUSG00000037771
ENSDARG00000058148	ENSORLG00000003783	ENSXETG00000002295	ENSMUSG00000014195
ENSDARG00000044422	ENSORLG00000003784	ENSXETG00000020999	ENSMUSG00000061393
ENSDARG00000052190	ENSORLG00000003786	ENSXETG00000021499	ENSMUSG00000079677
ENSDARG00000060596	ENSORLG00000003787	ENSXETG00000007026	ENSMUSG00000050697
ENSDARG00000059308	ENSORLG00000003792	ENSXETG00000008383	ENSMUSG00000030245
ENSDARG00000035406	ENSORLG00000003796	ENSXETG00000007029	ENSMUSG00000022151
ENSDARG00000089585	ENSORLG00000003799	ENSXETG00000002296	ENSMUSG00000017837
ENSDARG00000059234	ENSORLG00000003800	ENSXETG00000034180	ENSMUSG00000041632
ENSDARG00000055089	ENSORLG00000003801	ENSXETG00000017124	ENSMUSG00000056947
ENSDARG00000059613	ENSORLG00000003803	ENSXETG00000000083	ENSMUSG00000010057
ENSDARG00000040116	ENSORLG00000003805	ENSXETG00000033098	ENSMUSG00000050919
ENSDARG00000012995	ENSORLG00000003806	ENSXETG00000012141	ENSMUSG00000037761
ENSDARG00000076868	ENSORLG00000003808	ENSXETG00000016928	ENSMUSG00000016128
ENSDARG00000042845	ENSORLG00000003809	ENSXETG00000017979	ENSMUSG00000027301
ENSDARG00000058154	ENSORLG00000003810	ENSXETG00000002298	ENSMUSG00000014198
ENSDARG00000036308	ENSORLG00000003812	ENSXETG00000022012	ENSMUSG00000038058
ENSDARG00000078894	ENSORLG00000003814	ENSXETG00000000079	ENSMUSG00000032579
ENSDARG00000060316	ENSORLG00000003816	ENSXETG00000000078	ENSMUSG00000032578
ENSDARG00000016706	ENSORLG00000003819	ENSXETG00000025087	ENSMUSG00000026192
ENSDARG00000021889	ENSORLG00000003822	ENSXETG00000002644	ENSMUSG00000048582
ENSDARG00000074634	ENSORLG00000003823	ENSXETG00000011638	ENSMUSG00000003308
ENSDARG00000077523	ENSORLG00000003824	ENSXETG00000010171	ENSMUSG00000035517
ENSDARG00000089463	ENSORLG00000003825	ENSXETG00000002302	ENSMUSG00000017830
ENSDARG00000020145	ENSORLG00000003826	ENSXETG00000016909	ENSMUSG00000039620
ENSDARG00000035415	ENSORLG00000003829	ENSXETG00000007030	ENSMUSG00000039942
ENSDARG00000042707	ENSORLG00000003830	ENSXETG00000026112	ENSMUSG00000046352
ENSDARG00000040657	ENSORLG00000003834	ENSXETG00000003087	ENSMUSG00000041895
ENSDARG00000002642	ENSORLG00000003835	ENSXETG00000015811	ENSMUSG00000028488
ENSDARG00000068724	ENSORLG00000003837	ENSXETG00000017162	ENSMUSG00000025403
ENSDARG00000010098	ENSORLG00000003838	ENSXETG00000032625	ENSMUSG00000018846
ENSDARG00000057854	ENSORLG00000003840	ENSXETG00000009598	ENSMUSG00000061104
ENSDARG00000033411	ENSORLG00000003841	ENSXETG00000017432	ENSMUSG00000024857
ENSDARG00000094176	ENSORLG00000003842	ENSXETG00000011649	ENSMUSG00000096472
ENSDARG00000094792	ENSORLG00000003843	ENSXETG00000002765	ENSMUSG00000023277
ENSDARG00000032765	ENSORLG00000003844	ENSXETG00000018160	ENSMUSG00000021215
ENSDARG00000060688	ENSORLG00000003845	ENSXETG00000031376	ENSMUSG00000030966
ENSDARG00000079996	ENSORLG00000003847	ENSXETG00000017156	ENSMUSG00000040287
ENSDARG00000061989	ENSORLG00000003849	ENSXETG00000024155	ENSMUSG00000003199
ENSDARG00000071336	ENSORLG00000003850	ENSXETG00000030275	ENSMUSG00000033307
ENSDARG00000035391	ENSORLG00000003851	ENSXETG00000031652	ENSMUSG00000021650
ENSDARG00000009253	ENSORLG00000003853	ENSXETG00000012195	ENSMUSG00000074479
ENSDARG00000070080	ENSORLG00000003854	ENSXETG00000026016	ENSMUSG00000027799
ENSDARG00000089833	ENSORLG00000003855	ENSXETG00000018158	ENSMUSG00000033781
ENSDARG00000012094	ENSORLG00000003858	ENSXETG00000011197	ENSMUSG00000020612
ENSDARG00000074889	ENSORLG00000003859	ENSXETG00000003533	ENSMUSG00000028687
ENSDARG00000074168	ENSORLG00000003861	ENSXETG00000032856	ENSMUSG00000033799
ENSDARG00000006017	ENSORLG00000003868	ENSXETG00000002303	ENSMUSG00000020918
ENSDARG00000079486	ENSORLG00000003869	ENSXETG00000033816	ENSMUSG00000020614
ENSDARG00000089885	ENSORLG00000003870	ENSXETG00000021814	ENSMUSG00000009378
ENSDARG00000043236	ENSORLG00000003871	ENSXETG00000001016	ENSMUSG00000027793
ENSDARG00000063100	ENSORLG00000003873	ENSXETG00000016202	ENSMUSG00000026914
ENSDARG00000060120	ENSORLG00000003875	ENSXETG00000030358	ENSMUSG00000020258
ENSDARG00000009280	ENSORLG00000003877	ENSXETG00000001940	ENSMUSG00000055027
ENSDARG00000045513	ENSORLG00000003878	ENSXETG00000001869	ENSMUSG00000025782
ENSDARG00000079583	ENSORLG00000003880	ENSXETG00000020864	ENSMUSG00000024500
ENSDARG00000026762	ENSORLG00000003881	ENSXETG00000029958	ENSMUSG00000028995
ENSDARG00000077434	ENSORLG00000003883	ENSXETG00000015420	ENSMUSG00000078908
ENSDARG00000058237	ENSORLG00000003885	ENSXETG00000019994	ENSMUSG00000061887
ENSDARG00000029476	ENSORLG00000003886	ENSXETG00000009352	ENSMUSG00000028613
ENSDARG00000075707	ENSORLG00000003890	ENSXETG00000012198	ENSMUSG00000021806
ENSDARG00000061990	ENSORLG00000003891	ENSXETG00000033204	ENSMUSG00000035355
ENSDARG00000060631	ENSORLG00000003893	ENSXETG00000019611	ENSMUSG00000038860
ENSDARG00000074307	ENSORLG00000003895	ENSXETG00000007409	ENSMUSG00000041992
ENSDARG00000074617	ENSORLG00000003898	ENSXETG00000011603	ENSMUSG00000039474
ENSDARG00000075687	ENSORLG00000003899	ENSXETG00000000782	ENSMUSG00000014355
ENSDARG00000058563	ENSORLG00000003900	ENSXETG00000027330	ENSMUSG00000027300
ENSDARG00000011434	ENSORLG00000003901	ENSXETG00000012202	ENSMUSG00000071489
ENSDARG00000089428	ENSORLG00000003902	ENSXETG00000004289	ENSMUSG00000023460
ENSDARG00000078247	ENSORLG00000003905	ENSXETG00000027906	ENSMUSG00000019772
ENSDARG00000039020	ENSORLG00000003909	ENSXETG00000018545	ENSMUSG00000019773
ENSDARG00000078045	ENSORLG00000003911	ENSXETG00000003130	ENSMUSG00000037343
ENSDARG00000032256	ENSORLG00000003913	ENSXETG00000012203	ENSMUSG00000021830
ENSDARG00000076090	ENSORLG00000003914	ENSXETG00000011601	ENSMUSG00000063646
ENSDARG00000020136	ENSORLG00000003915	ENSXETG00000014173	ENSMUSG00000050737
ENSDARG00000005470	ENSORLG00000003916	ENSXETG00000006230	ENSMUSG00000074657
ENSDARG00000091408	ENSORLG00000003921	ENSXETG00000004290	ENSMUSG00000052105
ENSDARG00000021086	ENSORLG00000003923	ENSXETG00000014840	ENSMUSG00000044934
ENSDARG00000060005	ENSORLG00000003924	ENSXETG00000018904	ENSMUSG00000019774
ENSDARG00000016415	ENSORLG00000003925	ENSXETG00000021954	ENSMUSG00000025815
ENSDARG00000042122	ENSORLG00000003927	ENSXETG00000019998	ENSMUSG00000034853
ENSDARG00000025174	ENSORLG00000003929	ENSXETG00000014841	ENSMUSG00000021476
ENSDARG00000045289	ENSORLG00000003931	ENSXETG00000012204	ENSMUSG00000049092
ENSDARG00000022109	ENSORLG00000003933	ENSXETG00000018293	ENSMUSG00000053519
ENSDARG00000059960	ENSORLG00000003935	ENSXETG00000012092	ENSMUSG00000029055
ENSDARG00000019743	ENSORLG00000003938	ENSXETG00000011761	ENSMUSG00000031865
ENSDARG00000027501	ENSORLG00000003940	ENSXETG00000012844	ENSMUSG00000026854
ENSDARG00000074905	ENSORLG00000003942	ENSXETG00000009110	ENSMUSG00000039145
ENSDARG00000076659	ENSORLG00000003944	ENSXETG00000007411	ENSMUSG00000021175
ENSDARG00000004460	ENSORLG00000003945	ENSXETG00000034224	ENSMUSG00000026502
ENSDARG00000054572	ENSORLG00000003946	ENSXETG00000019172	ENSMUSG00000029658
ENSDARG00000075299	ENSORLG00000003947	ENSXETG00000009174	ENSMUSG00000021482
ENSDARG00000038113	ENSORLG00000003948	ENSXETG00000017322	ENSMUSG00000027651
ENSDARG00000037781	ENSORLG00000003950	ENSXETG00000007473	ENSMUSG00000027605
ENSDARG00000017615	ENSORLG00000003952	ENSXETG00000018304	ENSMUSG00000040610
ENSDARG00000042072	ENSORLG00000003953	ENSXETG00000021273	ENSMUSG00000023965
ENSDARG00000005485	ENSORLG00000003954	ENSXETG00000009114	ENSMUSG00000026668
ENSDARG00000077226	ENSORLG00000003955	ENSXETG00000009355	ENSMUSG00000032187
ENSDARG00000021938	ENSORLG00000003956	ENSXETG00000001820	ENSMUSG00000027796
ENSDARG00000061916	ENSORLG00000003958	ENSXETG00000013468	ENSMUSG00000040616
ENSDARG00000057479	ENSORLG00000003959	ENSXETG00000029997	ENSMUSG00000034987
ENSDARG00000019392	ENSORLG00000003961	ENSXETG00000000836	ENSMUSG00000020919
ENSDARG00000019230	ENSORLG00000003964	ENSXETG00000005009	ENSMUSG00000078177
ENSDARG00000089790	ENSORLG00000003965	ENSXETG00000014869	ENSMUSG00000048915
ENSDARG00000032963	ENSORLG00000003967	ENSXETG00000012080	ENSMUSG00000048001
ENSDARG00000005186	ENSORLG00000003968	ENSXETG00000007429	ENSMUSG00000025323
ENSDARG00000086933	ENSORLG00000003972	ENSXETG00000024099	ENSMUSG00000040086
ENSDARG00000006601	ENSORLG00000003973	ENSXETG00000013469	ENSMUSG00000040606
ENSDARG00000013044	ENSORLG00000003977	ENSXETG00000004051	ENSMUSG00000024099
ENSDARG00000056666	ENSORLG00000003978	ENSXETG00000030115	ENSMUSG00000048562
ENSDARG00000035427	ENSORLG00000003980	ENSXETG00000005018	ENSMUSG00000036160
ENSDARG00000069262	ENSORLG00000003981	ENSXETG00000002998	ENSMUSG00000042943
ENSDARG00000019417	ENSORLG00000003982	ENSXETG00000026537	ENSMUSG00000021453
ENSDARG00000076451	ENSORLG00000003984	ENSXETG00000026865	ENSMUSG00000057637
ENSDARG00000040860	ENSORLG00000003985	ENSXETG00000031730	ENSMUSG00000021326
ENSDARG00000028222	ENSORLG00000003989	ENSXETG00000013431	ENSMUSG00000025321
ENSDARG00000054741	ENSORLG00000003990	ENSXETG00000021539	ENSMUSG00000029334
ENSDARG00000061235	ENSORLG00000003991	ENSXETG00000001813	ENSMUSG00000036632
ENSDARG00000075774	ENSORLG00000003992	ENSXETG00000027639	ENSMUSG00000032998
ENSDARG00000013935	ENSORLG00000003995	ENSXETG00000032855	ENSMUSG00000048004
ENSDARG00000074087	ENSORLG00000003997	ENSXETG00000032954	ENSMUSG00000095930
ENSDARG00000015167	ENSORLG00000003998	ENSXETG00000008218	ENSMUSG00000028127
ENSDARG00000002330	ENSORLG00000003999	ENSXETG00000002992	ENSMUSG00000096225
ENSDARG00000061889	ENSORLG00000004004	ENSXETG00000013461	ENSMUSG00000028636
ENSDARG00000068400	ENSORLG00000004007	ENSXETG00000032207	ENSMUSG00000094870
ENSDARG00000092160	ENSORLG00000004008	ENSXETG00000031751	ENSMUSG00000046518
ENSDARG00000021013	ENSORLG00000004009	ENSXETG00000030465	ENSMUSG00000028128
ENSDARG00000030402	ENSORLG00000004012	ENSXETG00000025630	ENSMUSG00000007805
ENSDARG00000033428	ENSORLG00000004013	ENSXETG00000014602	ENSMUSG00000024098
ENSDARG00000029856	ENSORLG00000004014	ENSXETG00000018919	ENSMUSG00000053931
ENSDARG00000079470	ENSORLG00000004015	ENSXETG00000001892	ENSMUSG00000020015
ENSDARG00000079560	ENSORLG00000004016	ENSXETG00000022920	ENSMUSG00000035429
ENSDARG00000057419	ENSORLG00000004018	ENSXETG00000010924	ENSMUSG00000007034
ENSDARG00000056720	ENSORLG00000004019	ENSXETG00000026859	ENSMUSG00000070697
ENSDARG00000043548	ENSORLG00000004021	ENSXETG00000011644	ENSMUSG00000002820
ENSDARG00000013828	ENSORLG00000004022	ENSXETG00000022783	ENSMUSG00000020590
ENSDARG00000074515	ENSORLG00000004024	ENSXETG00000013277	ENSMUSG00000001985
ENSDARG00000068755	ENSORLG00000004025	ENSXETG00000001819	ENSMUSG00000027752
ENSDARG00000007244	ENSORLG00000004029	ENSXETG00000000300	ENSMUSG00000012777
ENSDARG00000018688	ENSORLG00000004030	ENSXETG00000001891	ENSMUSG00000008398
ENSDARG00000017128	ENSORLG00000004031	ENSXETG00000003734	ENSMUSG00000048612
ENSDARG00000037099	ENSORLG00000004036	ENSXETG00000002647	ENSMUSG00000038894
ENSDARG00000006926	ENSORLG00000004039	ENSXETG00000000104	ENSMUSG00000021900
ENSDARG00000060620	ENSORLG00000004041	ENSXETG00000002654	ENSMUSG00000049717
ENSDARG00000018891	ENSORLG00000004042	ENSXETG00000004762	ENSMUSG00000052926
ENSDARG00000078653	ENSORLG00000004044	ENSXETG00000004047	ENSMUSG00000024096
ENSDARG00000060723	ENSORLG00000004046	ENSXETG00000018384	ENSMUSG00000030987
ENSDARG00000078658	ENSORLG00000004047	ENSXETG00000001818	ENSMUSG00000027751
ENSDARG00000061355	ENSORLG00000004048	ENSXETG00000011988	ENSMUSG00000029811
ENSDARG00000019707	ENSORLG00000004049	ENSXETG00000004745	ENSMUSG00000039660
ENSDARG00000002494	ENSORLG00000004051	ENSXETG00000027510	ENSMUSG00000026971
ENSDARG00000009023	ENSORLG00000004052	ENSXETG00000008989	ENSMUSG00000014496
ENSDARG00000054771	ENSORLG00000004053	ENSXETG00000005560	ENSMUSG00000055737
ENSDARG00000076562	ENSORLG00000004054	ENSXETG00000019922	ENSMUSG00000020143
ENSDARG00000036913	ENSORLG00000004057	ENSXETG00000021997	ENSMUSG00000026811
ENSDARG00000022712	ENSORLG00000004061	ENSXETG00000007642	ENSMUSG00000004040
ENSDARG00000013863	ENSORLG00000004062	ENSXETG00000027391	ENSMUSG00000058503
ENSDARG00000074129	ENSORLG00000004064	ENSXETG00000004541	ENSMUSG00000043019
ENSDARG00000074170	ENSORLG00000004065	ENSXETG00000005569	ENSMUSG00000022184
ENSDARG00000060901	ENSORLG00000004066	ENSXETG00000009500	ENSMUSG00000042828
ENSDARG00000015747	ENSORLG00000004068	ENSXETG00000013644	ENSMUSG00000075528
ENSDARG00000028784	ENSORLG00000004070	ENSXETG00000018102	ENSMUSG00000029189
[truncated: 7,180 more rows]

## Sheet: EdgeFzmxm
Differential expresion D. rerio versus O. latypes
Genes	logFC	logCPM	PValue	FDR
ENSDARG00000020574	1159076492	1084508718	5.52e-64	3.93e-60
ENSDARG00000018820	8835137933	8908042116	5.5e-49	1.96e-45
ENSDARG00000077226	8897269265	9298924103	1.17e-48	2.78e-45
ENSDARG00000005162	8233383791	9065557188	7.92e-46	1.41e-42
ENSDARG00000019644	8058604473	8510098293	1.04e-42	1.48e-39
ENSDARG00000043154	7812076657	7179842756	2.57e-41	3.05e-38
ENSDARG00000058992	792491116	7183691739	7.79e-41	7.92e-38
ENSDARG00000032630	7711865706	8846556078	1.59e-40	1.42e-37
ENSDARG00000037919	8721731901	8101929798	3.98e-40	3.15e-37
ENSDARG00000089124	8518332178	8447363711	8.08e-40	5.75e-37
ENSDARG00000018534	7735752552	8204951516	2.82e-39	1.83e-36
ENSDARG00000022183	-677011269	6451258582	4.19e-37	2.49e-34
ENSDARG00000068724	7107174413	6264245071	2.62e-36	1.44e-33
ENSDARG00000015947	685212038	7364744027	3.91e-36	1.86e-33
ENSDARG00000057782	6676751083	6882917835	3.92e-36	1.86e-33
ENSDARG00000017105	6822445495	7092200162	6.73e-36	2.99e-33
ENSDARG00000056743	7134365943	7287611616	5.8e-35	2.43e-32
ENSDARG00000059391	-6383321708	6874124146	1.31e-34	5.17e-32
ENSDARG00000002131	7210839492	7908683424	1.54e-34	5.79e-32
ENSDARG00000037559	6478091121	8816196685	3.2e-34	1.14e-31
ENSDARG00000057303	6464628334	103691654	5.07e-34	1.72e-31
ENSDARG00000005699	6765557384	7885993788	5.41e-34	1.75e-31
ENSDARG00000034270	6667643249	7431370118	5.87e-34	1.82e-31
ENSDARG00000042644	-607505483	7029640398	1.14e-33	3.37e-31
ENSDARG00000017772	6426917101	7520790118	3.83e-33	1.09e-30
ENSDARG00000037935	-7298632263	1045931656	4.28e-33	1.17e-30
ENSDARG00000051887	6664270506	6151748262	7.74e-33	2.04e-30
ENSDARG00000004830	7565648269	7016941539	1.77e-32	4.5e-30
ENSDARG00000017657	-643245481	756427761	3.51e-32	8.61e-30
ENSDARG00000030514	6506540723	608936126	5.21e-32	1.24e-29
ENSDARG00000058560	6084210633	7008125069	6.1e-32	1.4e-29
ENSDARG00000037781	6030638934	6560779508	9.09e-32	2.02e-29
ENSDARG00000074244	6618561738	6285441122	9.42e-32	2.03e-29
ENSDARG00000042707	7504389602	655348493	1.7e-31	3.56e-29
ENSDARG00000041337	-5909986274	6529903642	4.61e-31	9.38e-29
ENSDARG00000061219	5953059245	8298562717	1.44e-30	2.85e-28
ENSDARG00000062245	6223795065	6386647912	2.26e-30	4.34e-28
ENSDARG00000008982	5592628749	6791351245	2.47e-30	4.62e-28
ENSDARG00000056563	6111006755	6217737156	3.16e-30	5.77e-28
ENSDARG00000095896	9368825472	9038667	5.21e-30	9.27e-28
ENSDARG00000017261	629105645	6035978816	5.66e-30	9.6e-28
ENSDARG00000070545	5908847765	8637201659	5.54e-30	9.6e-28
ENSDARG00000026531	6531423449	6966152065	1.12e-29	1.86e-27
ENSDARG00000000503	7096234018	6928507625	1.36e-29	2.18e-27
ENSDARG00000021647	5935083094	6426474046	1.38e-29	2.18e-27
ENSDARG00000077499	5826061342	6539600584	1.82e-29	2.81e-27
ENSDARG00000023542	6521348286	6109197288	1.92e-29	2.9e-27
ENSDARG00000002197	-5695398164	8054060449	2.06e-29	3.05e-27
ENSDARG00000036820	6148671238	7016850456	2.26e-29	3.28e-27
ENSDARG00000025554	6010562227	6403551778	2.42e-29	3.44e-27
ENSDARG00000059367	7813807992	7852341293	3.01e-29	4.2e-27
ENSDARG00000023536	5750668886	9331726537	3.53e-29	4.84e-27
ENSDARG00000002538	6028980003	618500094	4.95e-29	6.65e-27
ENSDARG00000019596	6019773492	6119260206	7.26e-29	9.58e-27
ENSDARG00000030761	6613739234	5774776973	7.66e-29	9.92e-27
ENSDARG00000010183	-5907566119	7277332271	2.43e-28	3.09e-26
ENSDARG00000092553	5887601082	1151696163	4.38e-28	5.48e-26
ENSDARG00000061211	-5156624267	6954358702	1.5e-27	1.84e-25
ENSDARG00000013415	5785835551	5769315147	2.12e-27	2.56e-25
ENSDARG00000077764	5532370471	7907054168	3.37e-27	4e-25
ENSDARG00000058230	5254125234	662571624	4.03e-27	4.7e-25
ENSDARG00000016598	7389327459	7095236495	4.67e-27	5.36e-25
ENSDARG00000028943	6077039367	6621104848	6.77e-27	7.65e-25
ENSDARG00000069006	557386206	6236906434	1.09e-26	1.21e-24
ENSDARG00000051886	5858489936	8093462619	1.18e-26	1.3e-24
ENSDARG00000018726	-5475194479	6167800553	1.29e-26	1.39e-24
ENSDARG00000006757	5359814821	8020237153	1.55e-26	1.65e-24
ENSDARG00000036252	544132056	6961558121	2.28e-26	2.38e-24
ENSDARG00000036299	5115457944	6698054558	2.32e-26	2.39e-24
ENSDARG00000005867	5250781735	6480901066	3.17e-26	3.22e-24
ENSDARG00000039343	5347166245	6150282435	3.31e-26	3.32e-24
ENSDARG00000044574	5970681097	5737124115	3.53e-26	3.49e-24
ENSDARG00000078680	6027410136	6115794198	3.99e-26	3.89e-24
ENSDARG00000033012	5609694363	6567957048	5.54e-26	5.33e-24
ENSDARG00000037501	-5041019008	6643283505	6.1e-26	5.79e-24
ENSDARG00000001994	6368394413	6049700039	7.22e-26	6.76e-24
ENSDARG00000060532	5560141801	6403405712	9.29e-26	8.59e-24
ENSDARG00000045401	5803822856	8564240084	1.17e-25	1.06e-23
ENSDARG00000071395	5685854765	5664573642	1.39e-25	1.25e-23
ENSDARG00000009336	5832392642	7227713664	1.5e-25	1.33e-23
ENSDARG00000018259	5425127589	6377456408	1.58e-25	1.39e-23
ENSDARG00000070670	5505659401	7858732528	2.02e-25	1.75e-23
ENSDARG00000032083	5020645134	6292003789	2.31e-25	1.98e-23
ENSDARG00000079198	5023263136	6713358514	6.52e-25	5.53e-23
ENSDARG00000030176	5584835591	5922600353	7.54e-25	6.24e-23
ENSDARG00000041450	5256048939	834171127	7.49e-25	6.24e-23
ENSDARG00000039066	7096508699	1053652359	1.56e-24	1.26e-22
ENSDARG00000086761	-5218472371	5663793352	1.55e-24	1.26e-22
ENSDARG00000014587	5407456111	7170394821	1.65e-24	1.32e-22
ENSDARG00000055874	5469107449	7472199717	2.06e-24	1.63e-22
ENSDARG00000037064	-6622393838	9834447777	2.18e-24	1.7e-22
ENSDARG00000054253	-4750477012	6249662089	2.37e-24	1.83e-22
ENSDARG00000060929	5390377255	5799689467	2.51e-24	1.92e-22
ENSDARG00000074168	4816252516	68620613	2.53e-24	1.92e-22
ENSDARG00000044588	5315659757	8798327464	6.11e-24	4.58e-22
ENSDARG00000029358	5385083651	7105175723	7.08e-24	5.25e-22
ENSDARG00000069175	5214240088	6430539691	8.88e-24	6.52e-22
ENSDARG00000077361	47722194	7211939925	1.09e-23	7.91e-22
ENSDARG00000037373	5507194113	5561194734	1.25e-23	8.97e-22
ENSDARG00000060646	5036486379	631476189	1.36e-23	9.7e-22
ENSDARG00000032584	-4849466588	5966978479	2.08e-23	1.46e-21
ENSDARG00000009021	5163311676	6465039753	2.16e-23	1.5e-21
ENSDARG00000016994	-5971665648	7902756447	2.21e-23	1.53e-21
ENSDARG00000023055	6932908139	1076744525	2.24e-23	1.54e-21
ENSDARG00000038537	5241945221	6201733635	2.51e-23	1.7e-21
ENSDARG00000088663	5299584042	5812030188	3.52e-23	2.36e-21
ENSDARG00000057904	4915533319	6826369565	3.61e-23	2.4e-21
ENSDARG00000055052	5981603119	6663398537	4.87e-23	3.21e-21
ENSDARG00000002167	5342923149	6115650168	5.06e-23	3.31e-21
ENSDARG00000090667	5648756142	7172133824	5.83e-23	3.77e-21
ENSDARG00000076927	567887918	5279465679	6.04e-23	3.87e-21
ENSDARG00000078789	5365804271	5671388069	8.05e-23	5.12e-21
ENSDARG00000009629	4818595064	6675671085	8.68e-23	5.47e-21
ENSDARG00000016871	4738436181	8384680099	1.14e-22	7.09e-21
ENSDARG00000059067	-5852638253	6917234847	1.53e-22	9.5e-21
ENSDARG00000013000	-4618154016	6112213814	1.69e-22	1.04e-20
ENSDARG00000054804	5050222029	906683637	1.98e-22	1.2e-20
ENSDARG00000056085	496431617	5930546738	2.02e-22	1.22e-20
ENSDARG00000056258	4438360393	6782631965	3.83e-22	2.29e-20
ENSDARG00000007641	-4760778016	8538085383	5.5e-22	3.26e-20
ENSDARG00000018130	4875222342	5728075419	6.83e-22	4.02e-20
ENSDARG00000036630	4580973545	6393257373	7.89e-22	4.61e-20
ENSDARG00000042586	-4671296277	7696993354	1.04e-21	6e-20
ENSDARG00000089422	-4939330051	570650353	1.07e-21	6.16e-20
ENSDARG00000038239	4753920511	8855326901	1.24e-21	7.06e-20
ENSDARG00000004635	5011862147	5979469557	1.47e-21	8.31e-20
ENSDARG00000060697	4607700311	7562982568	1.68e-21	9.4e-20
ENSDARG00000012405	4652356118	9960825132	1.87e-21	1.04e-19
ENSDARG00000079097	5242857814	5550630888	2.46e-21	1.36e-19
ENSDARG00000045279	4688206291	7156936579	3.19e-21	1.75e-19
ENSDARG00000032072	418650329	6740378496	3.37e-21	1.83e-19
ENSDARG00000004297	4521817795	6458815839	4.03e-21	2.17e-19
ENSDARG00000017397	4779761767	9285113441	5.05e-21	2.7e-19
ENSDARG00000063375	-505949951	6246368446	5.1e-21	2.71e-19
ENSDARG00000027182	575615674	4818877777	5.17e-21	2.73e-19
ENSDARG00000076568	4419170022	7433568287	5.63e-21	2.95e-19
ENSDARG00000005645	4435913389	6959676977	6.21e-21	3.23e-19
ENSDARG00000025754	5212459053	528324007	1.02e-20	5.27e-19
ENSDARG00000074369	-448669123	9786068526	1.05e-20	5.37e-19
ENSDARG00000037409	-4361670572	6411066319	1.13e-20	5.73e-19
ENSDARG00000010478	4723539257	9750426456	1.25e-20	6.31e-19
ENSDARG00000009867	4651518644	5751255204	1.3e-20	6.53e-19
ENSDARG00000020344	-4984484389	7556754444	1.45e-20	7.21e-19
ENSDARG00000034643	4886261585	6115674083	1.48e-20	7.34e-19
ENSDARG00000075380	4287042961	6493004387	1.9e-20	9.34e-19
ENSDARG00000045131	-4232128125	6756947026	2.07e-20	1.01e-18
ENSDARG00000001634	4569075447	7055245176	2.27e-20	1.1e-18
ENSDARG00000034771	5448404873	4964661658	2.67e-20	1.28e-18
ENSDARG00000074909	452452635	6099815819	2.66e-20	1.28e-18
ENSDARG00000041260	5541326213	5848925759	3.88e-20	1.84e-18
ENSDARG00000075989	4199568839	6966143675	4.55e-20	2.14e-18
ENSDARG00000017738	5023750485	5816679322	4.61e-20	2.16e-18
ENSDARG00000036031	5325700956	5014980668	7.35e-20	3.42e-18
ENSDARG00000020872	-4085942117	6255519111	8.56e-20	3.96e-18
ENSDARG00000044422	-458324887	777538293	1.04e-19	4.76e-18
ENSDARG00000074849	4402840914	790057645	1.05e-19	4.77e-18
ENSDARG00000088063	-4550455168	57615462	1.24e-19	5.6e-18
ENSDARG00000021611	4193401299	6212011997	1.44e-19	6.49e-18
ENSDARG00000023952	5917640177	4992694695	1.48e-19	6.64e-18
ENSDARG00000068369	4276169124	6344976892	1.52e-19	6.74e-18
ENSDARG00000034668	4390441675	579997865	1.73e-19	7.67e-18
ENSDARG00000088248	5516438714	5104386415	1.94e-19	8.52e-18
ENSDARG00000086899	-427037477	6126153379	2.15e-19	9.4e-18
ENSDARG00000058038	-4482739573	7636648499	2.75e-19	1.19e-17
ENSDARG00000006200	4237592678	9456334823	3.58e-19	1.54e-17
ENSDARG00000020153	4451496508	8876502465	3.77e-19	1.61e-17
ENSDARG00000087010	-4771244447	6163443346	3.86e-19	1.65e-17
ENSDARG00000063218	4302811736	6103088225	4.26e-19	1.8e-17
ENSDARG00000010785	4862330773	6027008531	5.48e-19	2.3e-17
ENSDARG00000071658	4619849824	5858760551	5.48e-19	2.3e-17
ENSDARG00000079996	5232773865	485166441	5.64e-19	2.35e-17
ENSDARG00000019601	4585497295	6463193461	5.92e-19	2.45e-17
ENSDARG00000060549	4516868436	5813904079	6.72e-19	2.76e-17
ENSDARG00000055069	504721258	5189071254	7.34e-19	3e-17
ENSDARG00000019426	4612402846	5796440142	8.89e-19	3.62e-17
ENSDARG00000075521	4782107591	5296349736	8.97e-19	3.63e-17
ENSDARG00000068457	4399229143	5640892687	1.08e-18	4.32e-17
ENSDARG00000018306	4672404525	8658679365	1.13e-18	4.52e-17
ENSDARG00000003938	4226009869	7692191864	1.17e-18	4.65e-17
ENSDARG00000008867	4181710717	6994661293	1.18e-18	4.68e-17
ENSDARG00000032264	4126368164	7477457924	1.19e-18	4.68e-17
ENSDARG00000079080	-4481228011	5647403736	1.21e-18	4.74e-17
ENSDARG00000068319	3940027309	6813101473	1.4e-18	5.44e-17
ENSDARG00000039225	3889176558	6819702242	1.55e-18	6e-17
ENSDARG00000055078	-4710759217	508758897	1.59e-18	6.08e-17
ENSDARG00000057352	-4106118861	5783558755	1.59e-18	6.08e-17
ENSDARG00000052734	-4527704173	5156070718	1.64e-18	6.26e-17
ENSDARG00000075552	-422325223	5702920286	1.83e-18	6.91e-17
ENSDARG00000055433	-4251569146	6831137697	2.22e-18	8.33e-17
ENSDARG00000078416	-4118668179	7951890503	2.22e-18	8.33e-17
ENSDARG00000078114	5294464881	5432629407	2.32e-18	8.63e-17
ENSDARG00000015805	4157011296	6153610079	2.51e-18	9.29e-17
ENSDARG00000074790	3933404406	6610927057	2.66e-18	9.81e-17
ENSDARG00000077860	4093552466	8142715481	3.49e-18	1.28e-16
ENSDARG00000006420	5038533563	5096970646	3.8e-18	1.39e-16
ENSDARG00000052641	4142954657	7475343917	3.99e-18	1.45e-16
ENSDARG00000060610	5285435971	4602743045	4.16e-18	1.5e-16
ENSDARG00000053070	4575045421	5695815786	4.44e-18	1.6e-16
ENSDARG00000046107	3779120032	6685984819	5.31e-18	1.9e-16
ENSDARG00000006514	426141478	7106719885	5.55e-18	1.98e-16
ENSDARG00000061918	4208718648	609426643	5.59e-18	1.98e-16
ENSDARG00000057940	4069653389	8604405681	6.55e-18	2.31e-16
ENSDARG00000006553	5008126188	7450030946	6.83e-18	2.4e-16
ENSDARG00000018508	4931380457	5183883562	7.02e-18	2.45e-16
ENSDARG00000005536	4080240551	6125235029	7.45e-18	2.59e-16
ENSDARG00000014573	-4108183154	7247809396	8.09e-18	2.79e-16
ENSDARG00000020741	4351854823	7762104814	8.38e-18	2.88e-16
ENSDARG00000010250	425123571	5790116721	9.55e-18	3.27e-16
ENSDARG00000056510	-3981106261	5707126835	1.07e-17	3.65e-16
ENSDARG00000058646	4507071406	5218180536	1.1e-17	3.74e-16
ENSDARG00000033099	4748204876	5392894166	1.15e-17	3.87e-16
ENSDARG00000063432	4416271258	5494943244	1.49e-17	5e-16
ENSDARG00000045172	-3901121364	5925457227	1.55e-17	5.17e-16
ENSDARG00000038066	4036222567	7963937053	1.58e-17	5.26e-16
ENSDARG00000035415	-3972742272	6104777882	1.84e-17	6.09e-16
ENSDARG00000018693	3995415317	8819188829	1.94e-17	6.38e-16
ENSDARG00000026862	383768941	6345944654	2.05e-17	6.72e-16
ENSDARG00000035400	3971430475	9228412544	2.17e-17	7.1e-16
ENSDARG00000008790	-374637132	7164513137	2.64e-17	8.57e-16
ENSDARG00000061471	4372425008	7262191715	2.83e-17	9.16e-16
ENSDARG00000003397	-4379328655	5064277679	2.95e-17	9.52e-16
ENSDARG00000007786	5573772736	8089868154	3.8e-17	1.22e-15
ENSDARG00000000086	3733278134	677805295	4.18e-17	1.34e-15
ENSDARG00000036775	-4195253666	5271496848	4.29e-17	1.36e-15
ENSDARG00000041627	4958140759	4975834158	4.38e-17	1.38e-15
ENSDARG00000070675	4902018467	4766074989	4.38e-17	1.38e-15
ENSDARG00000038074	4083147735	5992499607	4.5e-17	1.41e-15
ENSDARG00000036587	-3917862361	7489472075	5.23e-17	1.63e-15
ENSDARG00000016676	4370720722	5649673478	5.62e-17	1.75e-15
ENSDARG00000041155	3813694766	6398349503	6e-17	1.86e-15
ENSDARG00000090656	4318814698	5580317519	6.23e-17	1.92e-15
ENSDARG00000053934	-4202256264	5355319894	8.21e-17	2.52e-15
ENSDARG00000074646	-4264644674	6252078254	8.5e-17	2.6e-15
ENSDARG00000045798	-4756983985	8004312427	8.7e-17	2.64e-15
ENSDARG00000074480	-4538416316	4718986334	8.67e-17	2.64e-15
ENSDARG00000063385	4389773827	8119273359	9.22e-17	2.78e-15
ENSDARG00000090421	3921687035	7939819072	1.08e-16	3.24e-15
ENSDARG00000007601	-3822754605	7257720247	1.13e-16	3.37e-15
ENSDARG00000052522	4227517848	5511150788	1.25e-16	3.71e-15
ENSDARG00000013780	-412157533	7143634831	1.25e-16	3.72e-15
ENSDARG00000059680	3817616299	8031865763	1.37e-16	4.03e-15
ENSDARG00000030110	3910178366	6702334398	1.83e-16	5.37e-15
ENSDARG00000070832	4114971367	5558217669	2.04e-16	5.97e-15
ENSDARG00000043646	4433226533	5182794258	2.29e-16	6.67e-15
ENSDARG00000030307	3862845021	6027216385	2.31e-16	6.71e-15
ENSDARG00000079268	3833535107	5802613462	2.42e-16	7.01e-15
ENSDARG00000009899	3696621974	6984510083	2.57e-16	7.4e-15
ENSDARG00000029356	4540792602	6526236401	2.74e-16	7.84e-15
ENSDARG00000038190	4167724884	6379934075	2.74e-16	7.84e-15
ENSDARG00000015201	4145362595	7024112745	2.85e-16	8.11e-15
ENSDARG00000022569	4408982126	6088084489	3.16e-16	8.97e-15
ENSDARG00000067920	48321087	4960565469	3.44e-16	9.7e-15
ENSDARG00000014013	3719957779	7650623867	3.83e-16	1.08e-14
ENSDARG00000094353	-3915720218	5980338156	3.97e-16	1.11e-14
ENSDARG00000045528	4407975929	4850714034	3.99e-16	1.11e-14
ENSDARG00000044083	3949884587	6857847535	4.52e-16	1.26e-14
ENSDARG00000052155	-3663814923	7437553616	5.2e-16	1.44e-14
ENSDARG00000053210	4269499334	5432677655	5.42e-16	1.5e-14
ENSDARG00000076768	3959616561	59657653	5.88e-16	1.62e-14
ENSDARG00000005941	3727369961	765982836	5.96e-16	1.63e-14
ENSDARG00000025326	-3723328363	9303902531	6.09e-16	1.66e-14
ENSDARG00000037837	4012101206	655592252	7.09e-16	1.93e-14
ENSDARG00000052254	456160364	5078899696	7.37e-16	2e-14
ENSDARG00000087070	3822431237	5718682145	7.81e-16	2.11e-14
ENSDARG00000057723	-3991438516	5224915653	8.04e-16	2.16e-14
ENSDARG00000036329	5131784042	4812188029	8.12e-16	2.17e-14
ENSDARG00000079772	-3795319502	1104967363	8.25e-16	2.2e-14
ENSDARG00000021048	5213098022	440586293	8.46e-16	2.25e-14
ENSDARG00000056605	-3578369278	6353434318	9.43e-16	2.49e-14
ENSDARG00000005772	3786564736	5999401282	9.88e-16	2.6e-14
ENSDARG00000058876	-3989586227	5187881785	1.01e-15	2.65e-14
ENSDARG00000036865	-3547196556	6537978948	1.03e-15	2.7e-14
ENSDARG00000044902	3581436898	7406201857	1.12e-15	2.91e-14
ENSDARG00000079463	-3731321833	7147381972	1.19e-15	3.1e-14
ENSDARG00000027063	-3451951716	6747293267	1.3e-15	3.37e-14
ENSDARG00000028088	-4035566169	5709544864	1.42e-15	3.66e-14
ENSDARG00000038064	-3370166177	675417527	1.53e-15	3.93e-14
ENSDARG00000078148	-4029728212	5642016307	1.54e-15	3.94e-14
ENSDARG00000077093	3598049962	7564188653	1.67e-15	4.26e-14
ENSDARG00000095440	4715374396	5741588235	1.77e-15	4.51e-14
ENSDARG00000078574	3731398553	6427922051	1.94e-15	4.91e-14
ENSDARG00000060618	5291345194	4475377404	2.2e-15	5.56e-14
ENSDARG00000013007	3564794455	7083274374	2.3e-15	5.79e-14
ENSDARG00000035324	3740763348	8678303217	2.43e-15	6.09e-14
ENSDARG00000063258	4548045257	5127951075	2.44e-15	6.1e-14
ENSDARG00000003216	4277230294	5417364979	2.95e-15	7.33e-14
ENSDARG00000035810	4466348327	4690642685	2.98e-15	7.4e-14
ENSDARG00000015536	3533014166	6365828768	3.11e-15	7.69e-14
ENSDARG00000079276	3862396406	6540355012	3.16e-15	7.77e-14
ENSDARG00000011000	3552675846	6490635578	3.27e-15	8.03e-14
ENSDARG00000075349	3712906463	569843706	3.47e-15	8.48e-14
ENSDARG00000091726	4071659362	5406790449	3.51e-15	8.54e-14
ENSDARG00000016904	3371067687	6801488866	3.52e-15	8.56e-14
ENSDARG00000028159	3624973438	7354699851	3.72e-15	9.02e-14
ENSDARG00000029510	3528036462	6825120051	3.82e-15	9.22e-14
ENSDARG00000086505	-3455760131	699548144	3.95e-15	9.49e-14
ENSDARG00000037734	-4089026801	7014948104	4.27e-15	1.02e-13
ENSDARG00000013430	4514570129	1020834784	4.64e-15	1.11e-13
ENSDARG00000005479	3589102467	7891978789	4.72e-15	1.12e-13
ENSDARG00000018460	3628196996	6254028017	4.92e-15	1.17e-13
ENSDARG00000078381	3455668072	6305371121	5.62e-15	1.33e-13
ENSDARG00000057016	3585700611	6098653153	5.82e-15	1.37e-13
ENSDARG00000045140	4366528027	4704626641	6.21e-15	1.46e-13
ENSDARG00000004909	-3510515177	64826305	6.24e-15	1.46e-13
ENSDARG00000016350	-3504399038	7154614943	6.3e-15	1.47e-13
ENSDARG00000009982	-3654151155	7262276966	6.76e-15	1.57e-13
ENSDARG00000011665	3521732011	8873445983	7.12e-15	1.65e-13
ENSDARG00000024229	-3636049338	5649235756	7.22e-15	1.67e-13
ENSDARG00000090337	3529015227	7392251272	8.04e-15	1.85e-13
ENSDARG00000092836	-4099733972	4778793561	8.15e-15	1.87e-13
ENSDARG00000017246	3494966319	6272171529	8.56e-15	1.96e-13
ENSDARG00000045070	-4470395168	4770169719	9.11e-15	2.07e-13
ENSDARG00000028071	3817023943	5760946321	9.1e-15	2.07e-13
ENSDARG00000005574	4008250034	5331756259	9.41e-15	2.13e-13
ENSDARG00000075949	-4024252855	534874616	1.08e-14	2.45e-13
ENSDARG00000062727	43191109	5027077923	1.09e-14	2.46e-13
ENSDARG00000019961	-3382561975	6499552304	1.12e-14	2.51e-13
ENSDARG00000053326	3406446374	7023222151	1.14e-14	2.56e-13
ENSDARG00000017658	3437245485	6222882391	1.15e-14	2.56e-13
ENSDARG00000062951	-3582841973	6186526392	1.18e-14	2.62e-13
ENSDARG00000032221	351163825	6141376155	1.19e-14	2.63e-13
ENSDARG00000015126	3437668601	660312379	1.19e-14	2.64e-13
ENSDARG00000009194	3679395178	6435148462	1.24e-14	2.73e-13
ENSDARG00000067601	3858378543	6029242262	1.27e-14	2.79e-13
ENSDARG00000068191	3874205168	6073105339	1.43e-14	3.13e-13
ENSDARG00000070834	-3488183086	8130340901	1.43e-14	3.13e-13
ENSDARG00000060515	452943935	4564387732	1.54e-14	3.34e-13
ENSDARG00000038099	3494696278	6971179146	1.54e-14	3.34e-13
ENSDARG00000036080	4008240744	1107327634	1.76e-14	3.8e-13
ENSDARG00000060007	-3970854521	5622478458	1.85e-14	3.99e-13
ENSDARG00000007383	3504616756	5937409106	1.93e-14	4.16e-13
ENSDARG00000063731	-4361840983	5410901023	1.98e-14	4.23e-13
ENSDARG00000058108	4318517369	4853852709	1.98e-14	4.23e-13
ENSDARG00000038156	4461944069	777675495	1.99e-14	4.24e-13
ENSDARG00000005333	4223725149	6938886758	2.22e-14	4.72e-13
ENSDARG00000078293	3433899648	7173808268	2.23e-14	4.72e-13
ENSDARG00000079520	-3535278666	612394562	2.26e-14	4.77e-13
ENSDARG00000038985	-3674846545	6913482236	2.3e-14	4.84e-13
ENSDARG00000070621	4301655148	4587049444	2.4e-14	5.02e-13
ENSDARG00000038713	-3929617321	4808755234	2.4e-14	5.02e-13
ENSDARG00000020261	3719183613	8210026289	2.48e-14	5.17e-13
ENSDARG00000077383	3469321357	6317931897	2.49e-14	5.17e-13
ENSDARG00000020984	4014822922	5370736123	2.58e-14	5.35e-13
ENSDARG00000056666	3621586633	7473178306	2.62e-14	5.42e-13
ENSDARG00000077537	-4155005299	4485454063	2.82e-14	5.82e-13
ENSDARG00000038027	3450442888	5775255898	3.27e-14	6.73e-13
ENSDARG00000020007	3407350747	8883642604	3.35e-14	6.88e-13
ENSDARG00000020442	3302490429	623042114	3.73e-14	7.63e-13
ENSDARG00000077942	393652703	4983800794	4.08e-14	8.32e-13
ENSDARG00000002967	-3298497878	7344000657	4.61e-14	9.37e-13
ENSDARG00000022968	3334602308	7112355584	4.77e-14	9.68e-13
ENSDARG00000015208	3501682598	8170311806	4.99e-14	1.01e-12
ENSDARG00000075178	3647317505	5563195477	5.26e-14	1.06e-12
ENSDARG00000007136	4454965251	5975810716	5.49e-14	1.1e-12
ENSDARG00000062116	3407857454	5919739144	5.55e-14	1.11e-12
ENSDARG00000037030	3320546687	6357109909	5.6e-14	1.12e-12
ENSDARG00000061724	3297763614	7207732323	5.61e-14	1.12e-12
ENSDARG00000022659	3793539218	5304241834	5.71e-14	1.14e-12
ENSDARG00000052370	3486501986	6731179051	6e-14	1.19e-12
ENSDARG00000069339	4155850779	4875383246	6.05e-14	1.2e-12
ENSDARG00000016611	-3847043747	5041114809	6.29e-14	1.24e-12
ENSDARG00000058128	3445698539	8446633988	6.28e-14	1.24e-12
ENSDARG00000000651	-4056177092	4574570966	6.34e-14	1.24e-12
ENSDARG00000052470	3789546219	5254596091	6.36e-14	1.24e-12
ENSDARG00000041511	-3837083814	4917984957	6.61e-14	1.29e-12
ENSDARG00000057772	3235150749	6692319828	7.06e-14	1.37e-12
ENSDARG00000090971	4514593563	4240576955	7.65e-14	1.48e-12
ENSDARG00000076364	507946389	4304645245	7.95e-14	1.54e-12
ENSDARG00000004632	3989177717	5473302936	8.4e-14	1.62e-12
ENSDARG00000010472	314959086	6823593681	8.63e-14	1.66e-12
ENSDARG00000069093	3440258835	1042495965	8.86e-14	1.7e-12
ENSDARG00000073996	3287184367	6284738304	9.21e-14	1.76e-12
ENSDARG00000052701	-334444076	6224896613	9.52e-14	1.82e-12
ENSDARG00000015292	3326973826	6400927931	9.92e-14	1.89e-12
ENSDARG00000061862	4265221796	6787612157	1.05e-13	1.99e-12
ENSDARG00000068628	4508151172	5430621443	1.05e-13	2e-12
ENSDARG00000093448	3300145741	6119211254	1.07e-13	2.03e-12
ENSDARG00000026534	3266221894	701926113	1.13e-13	2.13e-12
ENSDARG00000043795	3716710361	9212160027	1.24e-13	2.32e-12
ENSDARG00000057322	4251261022	8149606213	1.27e-13	2.38e-12
ENSDARG00000076939	3656234154	5455644623	1.29e-13	2.41e-12
ENSDARG00000090495	-4022807352	8975351212	1.35e-13	2.51e-12
ENSDARG00000062148	3900521275	5080163851	1.36e-13	2.54e-12
ENSDARG00000036282	36723705	5225376505	1.39e-13	2.58e-12
ENSDARG00000003813	321958157	7107413941	1.4e-13	2.59e-12
ENSDARG00000005872	4135550181	459256631	1.43e-13	2.64e-12
ENSDARG00000028800	3217530817	6430123171	1.64e-13	3.02e-12
ENSDARG00000007624	4117842493	468103666	1.87e-13	3.43e-12
ENSDARG00000061644	-4868285637	6929824233	2.02e-13	3.69e-12
ENSDARG00000019753	4462793144	4358720745	2.03e-13	3.71e-12
ENSDARG00000005786	-4117966984	538380619	2.11e-13	3.83e-12
ENSDARG00000062972	3245503345	751193173	2.15e-13	3.9e-12
ENSDARG00000016651	3449007302	8110512129	2.17e-13	3.93e-12
ENSDARG00000023508	-3306673135	5959462443	2.2e-13	3.97e-12
ENSDARG00000062375	-4122676205	5550407903	2.23e-13	4.02e-12
ENSDARG00000040131	-332307649	6885926822	2.36e-13	4.25e-12
ENSDARG00000025375	3424309556	6119077618	2.58e-13	4.63e-12
ENSDARG00000058597	3376954066	6978347686	2.62e-13	4.69e-12
ENSDARG00000039452	3252813966	7630190839	2.68e-13	4.79e-12
ENSDARG00000005800	4484194858	4430210566	2.71e-13	4.82e-12
ENSDARG00000042382	3088398354	6703527399	2.75e-13	4.88e-12
ENSDARG00000063310	-3250845839	5775418931	2.77e-13	4.9e-12
ENSDARG00000095579	-380671021	6533777926	2.81e-13	4.97e-12
ENSDARG00000071013	3447995867	5941490591	2.86e-13	5.03e-12
ENSDARG00000067546	-3795388925	4905244667	3.1e-13	5.44e-12
ENSDARG00000076968	3322604127	6206092251	3.28e-13	5.75e-12
ENSDARG00000003470	3463920075	6331674235	3.36e-13	5.88e-12
ENSDARG00000043542	-3231666024	7728587754	3.38e-13	5.9e-12
ENSDARG00000063445	3262838867	6945474864	3.41e-13	5.93e-12
ENSDARG00000074393	-3787333671	4831507226	3.62e-13	6.28e-12
ENSDARG00000091059	-385066984	4932094166	4.27e-13	7.38e-12
ENSDARG00000063187	3272701457	6985398821	4.27e-13	7.38e-12
ENSDARG00000059362	4239862772	4986535455	5.21e-13	8.99e-12
ENSDARG00000014615	-3142681922	6273603124	5.39e-13	9.26e-12
ENSDARG00000078989	3248586433	5959483594	5.64e-13	9.67e-12
ENSDARG00000094324	3432080462	9231222296	6e-13	1.03e-11
ENSDARG00000027825	-3179091483	7436541808	6.17e-13	1.05e-11
ENSDARG00000069397	3186964347	7618764881	6.21e-13	1.06e-11
ENSDARG00000017439	-319886069	9000128163	6.25e-13	1.06e-11
ENSDARG00000053219	3600642912	56203617	6.3e-13	1.07e-11
ENSDARG00000093931	-348632455	5236446668	6.47e-13	1.09e-11
ENSDARG00000005567	3187435437	6129880004	6.61e-13	1.11e-11
ENSDARG00000029474	3984759468	4592110672	6.97e-13	1.17e-11
ENSDARG00000075020	3619787408	5637807472	7.87e-13	1.32e-11
ENSDARG00000027078	3425931406	6454339123	7.86e-13	1.32e-11
ENSDARG00000033376	3713763695	5596403232	8.11e-13	1.36e-11
ENSDARG00000062030	-3406182185	5365937502	8.83e-13	1.47e-11
ENSDARG00000016519	4855284925	4301266656	8.86e-13	1.47e-11
ENSDARG00000054723	3140013168	7390913848	8.87e-13	1.47e-11
ENSDARG00000035993	3402860833	8281003511	9.08e-13	1.5e-11
ENSDARG00000056122	3409801458	7451826589	1e-12	1.66e-11
ENSDARG00000010137	3371629599	7938282617	1.01e-12	1.66e-11
ENSDARG00000070029	-3195062078	5925880425	1.01e-12	1.66e-11
ENSDARG00000052004	322920224	8044594171	1.06e-12	1.74e-11
ENSDARG00000004712	4386220665	4988911128	1.07e-12	1.74e-11
ENSDARG00000001721	3203624589	6587702214	1.14e-12	1.87e-11
ENSDARG00000045636	4070952585	4619477732	1.24e-12	2.03e-11
ENSDARG00000078026	3200319501	6121455391	1.26e-12	2.05e-11
ENSDARG00000044075	3397613022	6145386524	1.28e-12	2.08e-11
ENSDARG00000060679	318558703	810452966	1.3e-12	2.11e-11
ENSDARG00000078983	3202318249	718883936	1.32e-12	2.12e-11
ENSDARG00000005762	3060950546	7208735579	1.4e-12	2.25e-11
ENSDARG00000088925	-4150851531	4298316922	1.45e-12	2.33e-11
ENSDARG00000019451	4602612902	3840457416	1.5e-12	2.41e-11
ENSDARG00000040362	3697734816	5229105747	1.51e-12	2.42e-11
ENSDARG00000008433	3226926645	8599708245	1.54e-12	2.46e-11
ENSDARG00000059881	-3719836914	4611311244	1.58e-12	2.52e-11
ENSDARG00000056314	-3747599928	1082076117	1.61e-12	2.55e-11
ENSDARG00000061233	3404696956	54840284	1.61e-12	2.55e-11
ENSDARG00000056600	3085346339	6468826287	1.61e-12	2.55e-11
ENSDARG00000054570	3176278699	8127586673	1.7e-12	2.68e-11
ENSDARG00000039390	-3098341247	612530068	1.7e-12	2.68e-11
ENSDARG00000077698	-3727024116	4588222896	1.71e-12	2.69e-11
ENSDARG00000039142	363509134	8095440594	1.99e-12	3.12e-11
ENSDARG00000009607	3382969231	5908753277	2.01e-12	3.15e-11
ENSDARG00000075530	3710567363	7180307911	2.02e-12	3.16e-11
ENSDARG00000046062	3352612398	7556678592	2.03e-12	3.16e-11
ENSDARG00000009563	3966437307	5628152599	2.08e-12	3.23e-11
ENSDARG00000079378	3181979349	818634579	2.1e-12	3.25e-11
ENSDARG00000090174	-3597865226	4842850304	2.21e-12	3.42e-11
ENSDARG00000026680	3134823865	5989922206	2.27e-12	3.49e-11
ENSDARG00000019649	3006613361	6992517251	2.27e-12	3.49e-11
ENSDARG00000063244	3001149265	6276424934	2.34e-12	3.6e-11
ENSDARG00000010831	3801176949	4833728501	2.55e-12	3.91e-11
ENSDARG00000015780	-3480178675	6490770363	2.55e-12	3.91e-11
ENSDARG00000076312	3943110146	4859060579	2.59e-12	3.95e-11
ENSDARG00000061268	3421313061	7074269636	2.65e-12	4.04e-11
ENSDARG00000078326	4028588881	6411949074	2.68e-12	4.08e-11
ENSDARG00000078600	3859190382	5114045557	2.69e-12	4.08e-11
ENSDARG00000015907	3045592307	6179079224	2.69e-12	4.08e-11
ENSDARG00000062055	3398757685	7334344333	2.85e-12	4.3e-11
ENSDARG00000021255	4371037422	3933582133	2.88e-12	4.34e-11
ENSDARG00000045367	3495850388	1106444259	2.99e-12	4.49e-11
ENSDARG00000076393	3573582113	5087111343	3e-12	4.51e-11
ENSDARG00000059308	3563395868	5225302151	3.23e-12	4.85e-11
ENSDARG00000089413	3296919588	5579415505	3.31e-12	4.96e-11
ENSDARG00000059059	3521908363	5396944154	3.44e-12	5.13e-11
ENSDARG00000003680	3469262283	5405202423	3.48e-12	5.18e-11
ENSDARG00000057438	-2956165833	6227451037	3.51e-12	5.21e-11
ENSDARG00000005713	-3377991052	5075890632	3.54e-12	5.24e-11
ENSDARG00000074876	-3818072787	5087257416	3.65e-12	5.4e-11
ENSDARG00000020072	3382543689	684171748	3.68e-12	5.42e-11
ENSDARG00000020197	3142429909	9949904618	3.68e-12	5.42e-11
ENSDARG00000013343	3625603514	4767136736	3.93e-12	5.78e-11
ENSDARG00000018149	3062957962	7075186383	4e-12	5.87e-11
ENSDARG00000005128	3783550162	5045372948	4.14e-12	6.05e-11
ENSDARG00000029865	3189094682	6450752946	4.13e-12	6.05e-11
ENSDARG00000078238	-4279242575	4610195056	4.25e-12	6.2e-11
ENSDARG00000033234	4193971982	6110657625	4.26e-12	6.2e-11
ENSDARG00000018698	3289970876	8776388716	4.41e-12	6.41e-11
ENSDARG00000089232	335356387	5589769485	5.02e-12	7.28e-11
ENSDARG00000089790	3145456639	6889582732	5.08e-12	7.34e-11
ENSDARG00000077934	3094964575	7802707407	5.28e-12	7.63e-11
ENSDARG00000004861	3936145648	4559725093	5.54e-12	7.98e-11
ENSDARG00000021827	-3064381361	5891106099	5.64e-12	8.12e-11
ENSDARG00000024324	3203407719	6399962069	5.71e-12	8.2e-11
ENSDARG00000061647	4872012615	4097729286	5.82e-12	8.33e-11
ENSDARG00000029114	457684354	3695854215	5.84e-12	8.35e-11
ENSDARG00000087939	-3912434202	5462507967	6.17e-12	8.79e-11
ENSDARG00000078452	2986064887	7254562816	6.41e-12	9.13e-11
ENSDARG00000055837	3114814733	5795624206	6.5e-12	9.23e-11
ENSDARG00000004470	372522853	5300975965	6.54e-12	9.27e-11
ENSDARG00000079766	-3993751148	4171827129	6.62e-12	9.36e-11
ENSDARG00000059857	-3610720546	6924054301	6.66e-12	9.4e-11
ENSDARG00000005470	3528708057	4831141604	6.69e-12	9.44e-11
ENSDARG00000062926	-40533357	3962757097	7.47e-12	1.05e-10
ENSDARG00000035914	3613344548	4894187164	7.51e-12	1.05e-10
ENSDARG00000068995	328915689	7993881533	7.57e-12	1.06e-10
ENSDARG00000057151	3052352183	5961966165	7.62e-12	1.07e-10
ENSDARG00000054619	29809986	7521957615	7.94e-12	1.11e-10
ENSDARG00000024209	3914751699	8192622227	7.98e-12	1.11e-10
ENSDARG00000044362	3673287577	4906095274	8.01e-12	1.11e-10
ENSDARG00000076874	4884040195	4561001147	8.32e-12	1.15e-10
ENSDARG00000045948	3403852036	5112844099	8.38e-12	1.16e-10
ENSDARG00000037746	3117938747	1222785634	8.39e-12	1.16e-10
ENSDARG00000059824	-30226012	5777419401	8.94e-12	1.23e-10
ENSDARG00000091478	-3689525752	5160190285	9.02e-12	1.24e-10
ENSDARG00000009886	-3562612257	5157433025	9.32e-12	1.28e-10
ENSDARG00000033999	4368290988	4181981574	9.71e-12	1.33e-10
ENSDARG00000092882	-3371975603	483199055	1.03e-11	1.41e-10
ENSDARG00000031651	3154735009	8052598146	1.07e-11	1.47e-10
ENSDARG00000027310	3111935021	7528193365	1.12e-11	1.53e-10
ENSDARG00000094792	3746498426	4466686113	1.15e-11	1.56e-10
ENSDARG00000039806	-3670482086	4390853245	1.15e-11	1.57e-10
ENSDARG00000037906	-3186730677	5577331531	1.2e-11	1.62e-10
ENSDARG00000037639	-3235846145	5274531883	1.26e-11	1.71e-10
ENSDARG00000057633	3710985012	589467994	1.29e-11	1.74e-10
ENSDARG00000006477	3057665304	774917003	1.34e-11	1.8e-10
ENSDARG00000043497	-3579890538	6124141573	1.37e-11	1.84e-10
ENSDARG00000068910	3756608136	6886317174	1.43e-11	1.92e-10
ENSDARG00000074969	-3728991266	4375976392	1.45e-11	1.94e-10
ENSDARG00000074796	3319527882	5750146323	1.45e-11	1.94e-10
ENSDARG00000067613	-2987741525	7218299081	1.46e-11	1.95e-10
ENSDARG00000061929	3299985745	7015817518	1.46e-11	1.95e-10
ENSDARG00000010191	427821634	3852572143	1.56e-11	2.08e-10
ENSDARG00000003818	3068996861	6461007269	1.59e-11	2.12e-10
ENSDARG00000022939	-3205375799	5890393655	1.64e-11	2.17e-10
ENSDARG00000030532	2956847931	6054161317	1.83e-11	2.42e-10
ENSDARG00000007244	-2881378261	6271676092	1.9e-11	2.51e-10
ENSDARG00000019595	-3250706436	5187409165	1.92e-11	2.53e-10
ENSDARG00000041417	-295120872	7632659192	1.96e-11	2.57e-10
ENSDARG00000002587	3154892425	7190551516	1.99e-11	2.61e-10
ENSDARG00000044521	3225054517	9450798153	2e-11	2.62e-10
ENSDARG00000060500	-2873506846	6107690923	2.07e-11	2.71e-10
ENSDARG00000013839	-2947756657	7601870617	2.09e-11	2.73e-10
ENSDARG00000014591	2970909212	8537437086	2.1e-11	2.74e-10
ENSDARG00000012378	3270161795	5514154621	2.11e-11	2.75e-10
ENSDARG00000052480	3047934186	770169114	2.17e-11	2.82e-10
ENSDARG00000002897	3126758356	628598901	2.19e-11	2.84e-10
ENSDARG00000014704	-3137627419	6458913221	2.23e-11	2.89e-10
ENSDARG00000063484	-2852418294	6825530916	2.27e-11	2.93e-10
ENSDARG00000074020	2809125466	661405572	2.27e-11	2.93e-10
ENSDARG00000005916	351202033	478747758	2.28e-11	2.94e-10
ENSDARG00000062933	3018336793	6637676656	2.35e-11	3.01e-10
ENSDARG00000043003	2890858826	6191849353	2.47e-11	3.16e-10
ENSDARG00000002336	3042907627	6459048921	2.53e-11	3.23e-10
ENSDARG00000020228	2921943115	7428959078	2.53e-11	3.23e-10
ENSDARG00000052131	-297668057	84233854	2.55e-11	3.25e-10
ENSDARG00000070612	3872304783	4968761796	2.67e-11	3.41e-10
ENSDARG00000034264	2879359921	7126788296	2.8e-11	3.56e-10
ENSDARG00000024844	3170215642	8309079234	2.93e-11	3.72e-10
ENSDARG00000058270	3011479662	7750642523	2.95e-11	3.73e-10
ENSDARG00000079967	3985311756	4043633004	2.98e-11	3.76e-10
ENSDARG00000077098	-3340986181	514388609	3.05e-11	3.85e-10
ENSDARG00000073975	-3697775946	8447223988	3.27e-11	4.11e-10
ENSDARG00000014386	3127555149	5495121243	3.37e-11	4.24e-10
ENSDARG00000031494	2978296936	8893712798	3.68e-11	4.62e-10
ENSDARG00000007172	2837002704	7218269383	3.74e-11	4.68e-10
ENSDARG00000002127	279471664	6705698201	3.8e-11	4.75e-10
ENSDARG00000011488	3220602287	5559202131	4.04e-11	5.04e-10
ENSDARG00000093405	4135824811	4466333653	4.25e-11	5.29e-10
ENSDARG00000010059	2898588809	7694172786	4.37e-11	5.44e-10
ENSDARG00000070266	4203943618	3783599393	4.44e-11	5.52e-10
ENSDARG00000059902	3123549793	5357329843	4.47e-11	5.54e-10
ENSDARG00000003865	-3331632865	4866150067	4.63e-11	5.73e-10
ENSDARG00000044097	-27929251	656677413	4.8e-11	5.94e-10
ENSDARG00000043510	4313220589	3976522105	4.99e-11	6.16e-10
ENSDARG00000011973	337472218	4775961992	5.22e-11	6.43e-10
ENSDARG00000020328	2840432905	6276926528	5.25e-11	6.46e-10
ENSDARG00000091306	3970817963	4290066575	5.33e-11	6.54e-10
ENSDARG00000087333	3082493172	6089672671	5.72e-11	7.01e-10
ENSDARG00000041190	3610661898	4417800033	5.9e-11	7.22e-10
ENSDARG00000036852	-3199198639	5288869524	5.94e-11	7.26e-10
ENSDARG00000045129	-3094304371	8766564046	6.05e-11	7.37e-10
ENSDARG00000004979	3532156152	5780780009	6.06e-11	7.38e-10
ENSDARG00000059209	-3071464936	5467413194	6.11e-11	7.42e-10
ENSDARG00000045207	3081351573	6221121207	6.52e-11	7.9e-10
ENSDARG00000031475	2927205397	815238285	6.52e-11	7.9e-10
ENSDARG00000055659	-3013228521	8539025639	6.55e-11	7.92e-10
ENSDARG00000059897	3318680723	5565352899	6.7e-11	8.08e-10
ENSDARG00000002798	-2724625679	685537457	6.87e-11	8.28e-10
ENSDARG00000060368	3489427507	5113960794	6.89e-11	8.28e-10
ENSDARG00000077555	3230181048	5245316411	7.06e-11	8.47e-10
ENSDARG00000024940	4399972603	3513951673	7.18e-11	8.6e-10
ENSDARG00000075252	2740032011	6921029467	7.61e-11	9.11e-10
ENSDARG00000052818	-2829738413	5985439508	7.88e-11	9.41e-10
ENSDARG00000077243	-2846875081	7241931794	8.36e-11	9.95e-10
ENSDARG00000042444	2838796084	6761073922	8.35e-11	9.95e-10
ENSDARG00000055938	2868232891	7143578756	8.73e-11	1.04e-09
ENSDARG00000013741	-2724467165	6636092367	9.07e-11	1.08e-09
ENSDARG00000088272	3535212108	4980397009	9.4e-11	1.11e-09
ENSDARG00000062178	2887038952	568865913	9.63e-11	1.14e-09
ENSDARG00000035558	3213985015	593494775	1e-10	1.18e-09
ENSDARG00000012347	4362842397	3495587961	1.02e-10	1.2e-09
ENSDARG00000014289	-3098068758	5282363243	1.02e-10	1.2e-09
ENSDARG00000078676	4144090396	7903437351	1.02e-10	1.2e-09
ENSDARG00000059386	-2776796738	6095841518	1.06e-10	1.24e-09
ENSDARG00000090912	3056673646	8156711398	1.06e-10	1.24e-09
ENSDARG00000076230	-3471816506	4603356613	1.09e-10	1.27e-09
ENSDARG00000062971	-2674015107	6656777171	1.14e-10	1.34e-09
ENSDARG00000089691	-3690400352	4979907618	1.15e-10	1.34e-09
ENSDARG00000088036	-310427598	5038023132	1.15e-10	1.34e-09
ENSDARG00000062919	-3317985691	4607526868	1.17e-10	1.36e-09
ENSDARG00000012519	2836969431	8670548193	1.19e-10	1.38e-09
ENSDARG00000013782	308213874	5436106597	1.28e-10	1.49e-09
ENSDARG00000014311	-2735359651	6147036775	1.29e-10	1.49e-09
ENSDARG00000055635	2947272651	8265580924	1.29e-10	1.49e-09
ENSDARG00000062168	-2706801043	6225209795	1.32e-10	1.52e-09
ENSDARG00000035924	2983667916	7198897848	1.38e-10	1.58e-09
ENSDARG00000032256	4370047348	60196064	1.38e-10	1.59e-09
ENSDARG00000095623	389681393	3967839796	1.38e-10	1.59e-09
ENSDARG00000013072	-343315175	7056117	1.42e-10	1.62e-09
ENSDARG00000006272	2908836167	6582331267	1.41e-10	1.62e-09
ENSDARG00000069044	3058346957	5446567229	1.42e-10	1.63e-09
ENSDARG00000007034	2643367738	6799143449	1.43e-10	1.63e-09
ENSDARG00000016490	2819644127	5882581151	1.45e-10	1.65e-09
ENSDARG00000058369	3132268116	863306789	1.51e-10	1.71e-09
ENSDARG00000062757	3750919214	4538828612	1.57e-10	1.78e-09
ENSDARG00000062270	3104652719	555356957	1.74e-10	1.97e-09
ENSDARG00000059274	3687139292	4420617211	1.75e-10	1.98e-09
ENSDARG00000017294	-2659998033	625868539	1.9e-10	2.14e-09
ENSDARG00000021984	4089351745	4310775913	1.92e-10	2.16e-09
ENSDARG00000062142	-3054380423	5268348482	1.92e-10	2.16e-09
ENSDARG00000018637	2764812175	7095783177	1.93e-10	2.17e-09
ENSDARG00000063663	-2728163529	6633105758	2e-10	2.24e-09
ENSDARG00000014731	-2792240579	8107086802	2.08e-10	2.32e-09
ENSDARG00000011615	342089971	4612246745	2.1e-10	2.35e-09
ENSDARG00000093406	3023182042	8411682137	2.15e-10	2.4e-09
ENSDARG00000019205	3036519402	7156479866	2.18e-10	2.43e-09
ENSDARG00000019588	-2895481846	7064113874	2.18e-10	2.43e-09
ENSDARG00000046002	2851743044	6004520766	2.23e-10	2.47e-09
ENSDARG00000004251	2895846015	5776788948	2.31e-10	2.56e-09
ENSDARG00000040005	-2666991479	6444277889	2.31e-10	2.56e-09
ENSDARG00000052148	354178349	4398164212	2.4e-10	2.65e-09
ENSDARG00000016022	3053622556	5899247145	2.45e-10	2.7e-09
ENSDARG00000012729	4116912982	3692392304	2.57e-10	2.83e-09
ENSDARG00000070995	-3475260937	4337876485	2.57e-10	2.83e-09
ENSDARG00000062244	2761776133	7762578595	2.64e-10	2.9e-09
ENSDARG00000006008	-2723426688	721736497	2.68e-10	2.93e-09
ENSDARG00000018810	-2943347133	5260264481	2.73e-10	2.99e-09
ENSDARG00000061570	-3140217378	653479125	2.73e-10	2.99e-09
ENSDARG00000027397	-2799979788	9453398021	2.82e-10	3.07e-09
ENSDARG00000070463	2797945513	7325036752	2.82e-10	3.07e-09
ENSDARG00000061579	2734418547	720672777	2.83e-10	3.08e-09
ENSDARG00000071336	-2634873154	6673100527	2.97e-10	3.23e-09
ENSDARG00000040255	-2832953442	5605012662	3.03e-10	3.29e-09
ENSDARG00000035954	3976795052	3737967661	3.06e-10	3.31e-09
ENSDARG00000037266	3979657987	4778846898	3.06e-10	3.31e-09
ENSDARG00000042996	3143783556	5591109658	3.27e-10	3.53e-09
ENSDARG00000061737	-2708671679	6071507407	3.33e-10	3.59e-09
ENSDARG00000063003	-2720501439	7386610736	3.47e-10	3.74e-09
ENSDARG00000039136	3936423321	4009857606	3.48e-10	3.74e-09
ENSDARG00000037018	2675729861	6581656469	3.7e-10	3.98e-09
ENSDARG00000060729	2766826632	6535827712	3.75e-10	4.02e-09
ENSDARG00000006288	3119148657	5163647338	3.76e-10	4.02e-09
ENSDARG00000076533	-2608639003	6934644037	3.76e-10	4.02e-09
ENSDARG00000053404	2770535523	8240645247	3.84e-10	4.1e-09
ENSDARG00000001621	-2657440378	730183039	4.15e-10	4.42e-09
ENSDARG00000074149	-3131135241	5667934352	4.3e-10	4.58e-09
ENSDARG00000043317	3089756785	5484343713	4.39e-10	4.66e-09
ENSDARG00000030560	2674180871	7524170766	4.47e-10	4.74e-09
ENSDARG00000020242	2775823581	7942488622	4.58e-10	4.85e-09
ENSDARG00000060348	3301727502	5011620816	4.62e-10	4.89e-09
ENSDARG00000002231	-3611823203	4528869723	4.65e-10	4.92e-09
ENSDARG00000010657	-3030547497	5081112172	4.67e-10	4.93e-09
ENSDARG00000077119	2840107907	575797813	4.8e-10	5.05e-09
ENSDARG00000009342	2722846768	807156155	5.32e-10	5.59e-09
ENSDARG00000089245	-3056391985	5056494519	5.34e-10	5.6e-09
ENSDARG00000007549	2994104754	5397319318	5.5e-10	5.76e-09
ENSDARG00000075132	-2781907435	9042806063	5.5e-10	5.76e-09
ENSDARG00000034894	2656978956	6420545791	5.51e-10	5.76e-09
ENSDARG00000059116	-3036361729	7304608908	5.63e-10	5.88e-09
ENSDARG00000014674	2762594509	752598341	5.78e-10	6.02e-09
ENSDARG00000073952	-2784278123	6191983266	5.8e-10	6.03e-09
ENSDARG00000035308	3130636897	5926079337	5.82e-10	6.05e-09
ENSDARG00000053917	-2661822008	6028327091	5.95e-10	6.17e-09
ENSDARG00000089138	2999483647	5270874273	6.02e-10	6.24e-09
ENSDARG00000016733	263908799	6465388646	6.04e-10	6.25e-09
ENSDARG00000002837	-379909403	3914069424	6.08e-10	6.28e-09
ENSDARG00000057321	-2706695024	7878626735	6.37e-10	6.57e-09
ENSDARG00000043323	-2571470984	6541487248	7.22e-10	7.44e-09
ENSDARG00000077111	-255571462	6573582948	7.46e-10	7.68e-09
ENSDARG00000056307	2936802726	6915981658	7.63e-10	7.84e-09
ENSDARG00000023495	3582848753	41236873	7.66e-10	7.86e-09
ENSDARG00000018426	-2780331783	8047041946	7.69e-10	7.88e-09
ENSDARG00000069074	2864192006	8231981754	8.73e-10	8.93e-09
ENSDARG00000018627	3714136723	3796250327	8.81e-10	8.99e-09
ENSDARG00000055759	2727310793	5752582564	8.86e-10	9.04e-09
ENSDARG00000078797	3633000316	4174689381	8.98e-10	9.14e-09
ENSDARG00000035056	3769262305	4100750313	9.02e-10	9.16e-09
ENSDARG00000061070	-2918492132	5216097806	9.02e-10	9.16e-09
ENSDARG00000055120	2867045261	8424261066	9.03e-10	9.16e-09
ENSDARG00000013694	3330472788	4741437668	9.05e-10	9.17e-09
ENSDARG00000069113	2907852502	7084462935	9.11e-10	9.21e-09
ENSDARG00000070353	3598857936	4295895284	9.23e-10	9.32e-09
ENSDARG00000061345	2838464212	7319267772	9.26e-10	9.33e-09
ENSDARG00000039302	3054589721	5474431179	9.41e-10	9.47e-09
ENSDARG00000087418	-2491391171	6740676467	9.77e-10	9.83e-09
ENSDARG00000034313	3727150371	9239890433	9.89e-10	9.93e-09
ENSDARG00000031600	3624677692	3903544119	1.01e-09	1.01e-08
ENSDARG00000062636	-2745441268	6958740592	1.05e-09	1.05e-08
ENSDARG00000035869	2657064113	7778459447	1.05e-09	1.05e-08
ENSDARG00000070429	2929348536	5518191879	1.05e-09	1.05e-08
ENSDARG00000008064	-2837325142	5251935064	1.09e-09	1.08e-08
ENSDARG00000030665	-279663292	8298343188	1.09e-09	1.08e-08
ENSDARG00000038566	393897301	3427540015	1.12e-09	1.12e-08
ENSDARG00000061067	3058509905	4946761521	1.13e-09	1.12e-08
ENSDARG00000010862	-2536046394	633126124	1.16e-09	1.15e-08
ENSDARG00000045893	3020129371	5672128343	1.2e-09	1.19e-08
ENSDARG00000078688	3707459186	3728087086	1.21e-09	1.2e-08
ENSDARG00000074301	2677327004	5851706273	1.27e-09	1.26e-08
ENSDARG00000069314	-3139326253	446818201	1.29e-09	1.28e-08
ENSDARG00000006758	30662177	4870334367	1.3e-09	1.28e-08
ENSDARG00000076225	-3075644032	5094082094	1.33e-09	1.31e-08
ENSDARG00000018441	2876980194	5236610043	1.4e-09	1.38e-08
ENSDARG00000055737	2531658185	6842663413	1.41e-09	1.38e-08
ENSDARG00000074414	2701900849	6295186708	1.41e-09	1.39e-08
ENSDARG00000002403	2525959839	7016650452	1.42e-09	1.39e-08
ENSDARG00000076937	-3431492052	4374697461	1.47e-09	1.43e-08
ENSDARG00000059629	3022323191	5339416603	1.5e-09	1.47e-08
ENSDARG00000053405	-305532441	8208610735	1.63e-09	1.59e-08
ENSDARG00000045628	3532596418	4089369395	1.68e-09	1.63e-08
ENSDARG00000032157	3219759879	4583205639	1.71e-09	1.66e-08
ENSDARG00000006487	2701386901	9506788925	1.72e-09	1.67e-08
ENSDARG00000045639	3238101684	4591005635	1.74e-09	1.69e-08
ENSDARG00000003235	-2662726264	8102034667	1.77e-09	1.71e-08
ENSDARG00000040338	-2520432865	6314795737	1.78e-09	1.72e-08
ENSDARG00000074845	-2469760439	6676374733	1.78e-09	1.72e-08
ENSDARG00000063414	-2810961309	5795447005	1.8e-09	1.73e-08
ENSDARG00000037963	386023659	4177304275	1.82e-09	1.75e-08
ENSDARG00000062450	3157704646	4813285846	1.82e-09	1.75e-08
ENSDARG00000045447	4020269447	3703153997	1.83e-09	1.75e-08
ENSDARG00000016528	-2766652391	5458100856	1.84e-09	1.76e-08
ENSDARG00000018956	-2567439957	6145304827	1.86e-09	1.78e-08
ENSDARG00000007241	2549259296	6755532275	1.87e-09	1.78e-08
ENSDARG00000068404	2567033665	6466077969	1.89e-09	1.8e-08
ENSDARG00000067799	-337940458	434089994	1.9e-09	1.81e-08
ENSDARG00000022303	3308636926	5745619959	1.92e-09	1.83e-08
ENSDARG00000075435	-2612767504	7294056053	1.93e-09	1.84e-08
ENSDARG00000026165	2744471085	8701231739	1.94e-09	1.84e-08
ENSDARG00000030213	2512968605	6586131133	1.96e-09	1.86e-08
ENSDARG00000007720	-2652917159	7559221635	2e-09	1.9e-08
ENSDARG00000060070	2552357529	6358074612	2.01e-09	1.9e-08
ENSDARG00000071872	3774353727	371938252	2.05e-09	1.94e-08
ENSDARG00000039521	3626596543	3775963549	2.12e-09	2e-08
ENSDARG00000044047	-3411134274	4006571251	2.13e-09	2.01e-08
ENSDARG00000074183	3133383783	4663885343	2.15e-09	2.02e-08
ENSDARG00000041435	2645508325	9207341381	2.18e-09	2.05e-08
ENSDARG00000045094	-3586901929	6037329059	2.22e-09	2.08e-08
ENSDARG00000075596	-3720754262	5223140964	2.23e-09	2.08e-08
ENSDARG00000034293	2680004924	7807987643	2.24e-09	2.1e-08
ENSDARG00000062986	243772592	678152356	2.25e-09	2.1e-08
ENSDARG00000067801	-2505337517	6193389194	2.28e-09	2.13e-08
ENSDARG00000011662	2543113292	6168646598	2.31e-09	2.16e-08
ENSDARG00000075119	-3292042627	5402941036	2.34e-09	2.17e-08
ENSDARG00000013794	3912223845	3416815287	2.35e-09	2.18e-08
ENSDARG00000028148	2767911715	5632586302	2.36e-09	2.19e-08
ENSDARG00000003570	-2625952186	9163653073	2.36e-09	2.19e-08
ENSDARG00000010098	2606936455	5948110146	2.4e-09	2.22e-08
ENSDARG00000037845	2596417261	6846017905	2.43e-09	2.24e-08
ENSDARG00000058148	2531459843	7269295607	2.44e-09	2.25e-08
ENSDARG00000031855	4308336227	401628867	2.46e-09	2.27e-08
ENSDARG00000079003	-3535140067	3903308698	2.51e-09	2.31e-08
ENSDARG00000038154	-2838479449	5380503968	2.56e-09	2.35e-08
ENSDARG00000036755	-2412742574	6775961835	2.56e-09	2.35e-08
ENSDARG00000001734	-2484173717	6449869303	2.59e-09	2.38e-08
ENSDARG00000061414	2673158624	5698389358	2.6e-09	2.39e-08
ENSDARG00000025200	261492318	5779686126	2.65e-09	2.42e-08
ENSDARG00000029071	-2486460999	6520294234	2.66e-09	2.43e-08
ENSDARG00000054533	3435599947	8717049111	2.69e-09	2.46e-08
ENSDARG00000071465	3441491092	4148897804	2.77e-09	2.52e-08
ENSDARG00000052242	3724566523	3337300089	2.78e-09	2.53e-08
ENSDARG00000076618	2934986109	5347621016	2.81e-09	2.55e-08
ENSDARG00000010381	2738124908	7294364782	2.82e-09	2.56e-08
ENSDARG00000003411	-2503369305	7055668235	2.87e-09	2.6e-08
ENSDARG00000059259	2524813641	7342198111	2.88e-09	2.6e-08
ENSDARG00000041133	3258339066	5013373158	2.88e-09	2.6e-08
ENSDARG00000087545	-2507982158	6295675551	2.92e-09	2.63e-08
ENSDARG00000038585	-2602216135	7101762579	2.94e-09	2.66e-08
ENSDARG00000086142	3124672189	4550172707	3e-09	2.7e-08
ENSDARG00000076171	2824612569	5806531739	3.06e-09	2.75e-08
ENSDARG00000008904	-2453971572	6313141857	3.09e-09	2.77e-08
ENSDARG00000005891	-2540423796	7309196877	3.17e-09	2.85e-08
ENSDARG00000052518	2875193312	5263889081	3.22e-09	2.88e-08
ENSDARG00000092367	-2549840513	6094044654	3.32e-09	2.97e-08
ENSDARG00000055838	-2623371743	5928802821	3.41e-09	3.05e-08
ENSDARG00000007025	-2584223456	5995617309	3.43e-09	3.07e-08
ENSDARG00000043211	3498951323	384478304	3.49e-09	3.11e-08
ENSDARG00000077987	3301186324	4141655853	3.51e-09	3.12e-08
ENSDARG00000003776	2983640486	5590785777	3.51e-09	3.12e-08
ENSDARG00000045873	-2499194578	6079462349	3.51e-09	3.12e-08
ENSDARG00000061243	-3262417943	4358444371	3.52e-09	3.13e-08
ENSDARG00000021343	2896517475	7646204162	3.72e-09	3.29e-08
ENSDARG00000003069	-2750905772	6551750933	3.72e-09	3.3e-08
ENSDARG00000039162	2927618384	7861717151	3.74e-09	3.31e-08
ENSDARG00000079363	-2431009177	6878333401	3.84e-09	3.39e-08
ENSDARG00000074465	-2631986473	6409120955	3.86e-09	3.4e-08
ENSDARG00000041304	3463855082	4125492555	3.95e-09	3.48e-08
ENSDARG00000010601	-2600824013	5995639222	3.97e-09	3.5e-08
ENSDARG00000025593	295322735	5439496272	4.06e-09	3.56e-08
ENSDARG00000031126	-2705052119	5548519429	4.12e-09	3.62e-08
ENSDARG00000070055	258830764	6393028805	4.15e-09	3.64e-08
ENSDARG00000013400	-2881307048	5302303434	4.19e-09	3.67e-08
ENSDARG00000042122	-3283077634	5000558404	4.26e-09	3.73e-08
ENSDARG00000058504	2810714515	7475156963	4.46e-09	3.89e-08
ENSDARG00000076177	2778263653	9111097976	4.5e-09	3.92e-08
ENSDARG00000008174	-2456433021	6520635919	4.69e-09	4.09e-08
ENSDARG00000001933	-3394219669	448528212	4.71e-09	4.1e-08
ENSDARG00000013505	2685844373	6207368186	4.75e-09	4.12e-08
ENSDARG00000043031	-260042219	7179066859	4.75e-09	4.12e-08
ENSDARG00000004771	-2434156443	6316442273	4.83e-09	4.19e-08
ENSDARG00000019150	2933291384	5200330998	4.88e-09	4.22e-08
ENSDARG00000041110	-2602479963	6080627485	4.89e-09	4.23e-08
ENSDARG00000087937	-2560306553	7495590606	5.06e-09	4.37e-08
ENSDARG00000006691	2602241193	1023977971	5.2e-09	4.48e-08
ENSDARG00000074466	3836591447	3122822095	5.24e-09	4.52e-08
ENSDARG00000029500	2717577649	9022280245	5.35e-09	4.6e-08
ENSDARG00000020054	-2888525451	4914000218	5.38e-09	4.62e-08
ENSDARG00000008678	2530648605	5967691551	5.49e-09	4.71e-08
ENSDARG00000035770	2548854998	5891675005	5.51e-09	4.72e-08
ENSDARG00000042249	252679791	7029834296	5.51e-09	4.72e-08
ENSDARG00000045428	-2513099554	5940252959	5.53e-09	4.73e-08
ENSDARG00000017126	-2773378278	6936785018	5.58e-09	4.76e-08
ENSDARG00000024561	2554658939	8555278148	5.8e-09	4.95e-08
ENSDARG00000076667	-2764618562	1260357748	5.81e-09	4.95e-08
ENSDARG00000062864	2737258451	5311208009	5.95e-09	5.07e-08
ENSDARG00000026845	2656916375	8313637441	5.98e-09	5.09e-08
ENSDARG00000052065	-2415908853	7023599714	6.05e-09	5.14e-08
ENSDARG00000035084	2906070561	4897982906	6.12e-09	5.19e-08
ENSDARG00000062089	2436692383	6496263439	6.37e-09	5.4e-08
ENSDARG00000030106	3442420452	4059063077	6.43e-09	5.44e-08
ENSDARG00000091537	2524842839	5992547128	6.44e-09	5.44e-08
ENSDARG00000061936	-2689428186	5394795347	6.45e-09	5.45e-08
ENSDARG00000020048	2601755145	6950110893	6.57e-09	5.54e-08
ENSDARG00000042997	292112686	4857029183	6.83e-09	5.75e-08
ENSDARG00000051888	3243510118	8051794985	6.95e-09	5.85e-08
ENSDARG00000052104	3245363629	4286416373	7.29e-09	6.13e-08
ENSDARG00000061437	-241186688	616736455	7.42e-09	6.23e-08
ENSDARG00000062268	-2948397925	7877151255	7.51e-09	6.29e-08
ENSDARG00000079623	3731955829	3856705241	7.53e-09	6.31e-08
ENSDARG00000025576	2882180617	5040744558	7.68e-09	6.42e-08
ENSDARG00000037618	295722606	592659122	7.86e-09	6.57e-08
ENSDARG00000015722	2525132967	5793480691	7.92e-09	6.61e-08
ENSDARG00000060626	3385047604	452197188	7.98e-09	6.65e-08
ENSDARG00000060260	-2748743049	52497081	7.99e-09	6.66e-08
ENSDARG00000006687	2489316449	7784639093	8.11e-09	6.74e-08
ENSDARG00000006462	255975275	5841902971	8.38e-09	6.96e-08
ENSDARG00000073741	-2638367252	5515765373	8.49e-09	7.04e-08
ENSDARG00000043371	-2528318499	9630243234	8.94e-09	7.41e-08
ENSDARG00000003931	2983300577	4500692394	9e-09	7.45e-08
ENSDARG00000010266	263786377	8684018301	9.1e-09	7.52e-08
ENSDARG00000024642	-2626702603	6841838192	9.25e-09	7.64e-08
ENSDARG00000005628	3574754167	4184261682	9.27e-09	7.64e-08
ENSDARG00000019930	2531251437	5735765289	9.27e-09	7.64e-08
ENSDARG00000025220	2534688819	6385542234	9.35e-09	7.7e-08
ENSDARG00000027582	2823468736	505707144	9.56e-09	7.86e-08
ENSDARG00000058365	2527627515	7719069532	9.61e-09	7.89e-08
ENSDARG00000073893	3633852996	3590485998	9.71e-09	7.96e-08
ENSDARG00000052957	2961305522	5318317554	9.84e-09	8.06e-08
ENSDARG00000006640	3039143803	4883923929	9.88e-09	8.09e-08
ENSDARG00000061854	2484297822	7160058273	1.04e-08	8.54e-08
ENSDARG00000043976	2677272743	9624348929	1.05e-08	8.58e-08
ENSDARG00000073784	2951754793	5045607263	1.07e-08	8.72e-08
ENSDARG00000051875	2998405647	5094990301	1.08e-08	8.82e-08
ENSDARG00000075978	2490303683	739162478	1.14e-08	9.24e-08
ENSDARG00000060715	2448629492	6876241946	1.14e-08	9.24e-08
ENSDARG00000069672	3196218885	4162969794	1.2e-08	9.75e-08
ENSDARG00000010816	3424934044	4110044925	1.2e-08	9.76e-08
ENSDARG00000030166	-3285360217	5280189363	1.22e-08	9.88e-08
ENSDARG00000059773	3688892201	3103589112	1.22e-08	9.91e-08
ENSDARG00000040184	2524292012	9953892857	1.23e-08	9.91e-08
ENSDARG00000076239	-3084056928	6376136464	1.25e-08	1.01e-07
ENSDARG00000006299	2960006129	4508640345	1.25e-08	1.01e-07
ENSDARG00000021208	2672554198	627719851	1.26e-08	1.02e-07
ENSDARG00000014646	-2558164785	8191627912	1.26e-08	1.02e-07
ENSDARG00000058158	3773305957	2950263014	1.27e-08	1.02e-07
ENSDARG00000067607	-238988187	6919302812	1.28e-08	1.03e-07
ENSDARG00000078456	-2767416874	5995846178	1.28e-08	1.03e-07
ENSDARG00000054849	2538005125	8225236319	1.29e-08	1.03e-07
ENSDARG00000052520	-3442560644	3704201841	1.3e-08	1.04e-07
ENSDARG00000044968	-2366073791	710524313	1.31e-08	1.05e-07
ENSDARG00000006527	2596434368	8106406639	1.34e-08	1.07e-07
ENSDARG00000075339	-2973763384	427198618	1.38e-08	1.1e-07
ENSDARG00000005172	2676050569	5141147135	1.39e-08	1.11e-07
ENSDARG00000011312	240292156	635349252	1.41e-08	1.12e-07
ENSDARG00000010779	2407959211	6307396628	1.41e-08	1.12e-07
ENSDARG00000015731	-2782672559	5001911535	1.43e-08	1.14e-07
ENSDARG00000052649	2675356263	7027957572	1.47e-08	1.16e-07
ENSDARG00000017929	2423935163	7620861065	1.48e-08	1.17e-07
ENSDARG00000010873	2442042996	7673269685	1.52e-08	1.2e-07
ENSDARG00000041504	-2954711156	4897564902	1.56e-08	1.23e-07
ENSDARG00000010415	-2878201987	4524887701	1.56e-08	1.23e-07
ENSDARG00000024492	2425655119	7673512302	1.59e-08	1.25e-07
ENSDARG00000016830	2733570436	8657935189	1.61e-08	1.27e-07
ENSDARG00000011141	2554708644	6876812333	1.63e-08	1.28e-07
ENSDARG00000075710	-2721821288	5128580681	1.65e-08	1.3e-07
ENSDARG00000030790	2437584279	6007877044	1.72e-08	1.35e-07
ENSDARG00000015392	2434716609	8302738494	1.72e-08	1.35e-07
ENSDARG00000052536	2383813183	7512802707	1.73e-08	1.36e-07
ENSDARG00000040485	3485142606	3724715859	1.75e-08	1.37e-07
ENSDARG00000074451	2824764218	5103369121	1.75e-08	1.37e-07
ENSDARG00000070603	-2801627887	564620781	1.85e-08	1.45e-07
ENSDARG00000076724	2494948284	5811460786	1.86e-08	1.45e-07
ENSDARG00000069419	-2342682375	6486235663	1.86e-08	1.45e-07
ENSDARG00000051899	3216906727	3986234665	1.92e-08	1.49e-07
ENSDARG00000040315	2480074763	7736193036	1.92e-08	1.49e-07
ENSDARG00000039098	3232849695	3952563502	1.98e-08	1.53e-07
ENSDARG00000079482	2835076279	5520165643	1.99e-08	1.54e-07
ENSDARG00000042826	3449103111	3968951595	2.03e-08	1.57e-07
ENSDARG00000019222	-2343244481	7036710463	2.05e-08	1.58e-07
ENSDARG00000016613	-2550384284	5501272665	2.05e-08	1.59e-07
ENSDARG00000075584	3268980518	4159133773	2.1e-08	1.62e-07
ENSDARG00000063177	-239720907	7478970446	2.1e-08	1.62e-07
ENSDARG00000078133	2372037997	6391134541	2.2e-08	1.69e-07
ENSDARG00000075333	-2721551474	6184486638	2.31e-08	1.78e-07
ENSDARG00000025122	-3017096779	4323562652	2.32e-08	1.78e-07
ENSDARG00000079125	-2978480826	4165575601	2.32e-08	1.78e-07
ENSDARG00000061751	-2686435428	5601679224	2.38e-08	1.82e-07
ENSDARG00000042126	2334997755	7077680808	2.37e-08	1.82e-07
ENSDARG00000017821	3260009513	4473127127	2.4e-08	1.84e-07
ENSDARG00000090180	-2886323717	4454026798	2.42e-08	1.85e-07
ENSDARG00000012432	2390899339	7032355414	2.42e-08	1.85e-07
ENSDARG00000071288	2653231163	5107099098	2.52e-08	1.92e-07
ENSDARG00000086150	-2240012311	6708173648	2.53e-08	1.93e-07
ENSDARG00000053484	2366797492	7441431922	2.53e-08	1.93e-07
ENSDARG00000075766	-2821268323	459274483	2.54e-08	1.93e-07
ENSDARG00000025338	2715347013	4851025343	2.65e-08	2.01e-07
ENSDARG00000077776	2558600333	8822924096	2.7e-08	2.05e-07
ENSDARG00000074571	-2338985362	6275999179	2.76e-08	2.09e-07
ENSDARG00000078001	-259518877	5439084401	2.77e-08	2.09e-07
ENSDARG00000086747	-2294215481	6410448827	2.78e-08	2.1e-07
ENSDARG00000091419	2867633913	8411965211	2.87e-08	2.17e-07
ENSDARG00000015807	256633821	5538318024	2.94e-08	2.22e-07
ENSDARG00000074121	2365832672	7017271658	2.94e-08	2.22e-07
ENSDARG00000061352	3656954117	3267826033	2.98e-08	2.24e-07
ENSDARG00000009350	2394436062	5703060559	3e-08	2.26e-07
ENSDARG00000035868	3268765639	4383426258	3.01e-08	2.26e-07
ENSDARG00000043864	3703738478	2890527698	3.02e-08	2.27e-07
ENSDARG00000061638	-3287386169	3431671934	3.13e-08	2.35e-07
ENSDARG00000073962	-2525891381	5928247744	3.2e-08	2.39e-07
ENSDARG00000020607	2474378542	6932890026	3.21e-08	2.4e-07
ENSDARG00000086523	2769630428	4971239351	3.24e-08	2.42e-07
ENSDARG00000095046	-2294634559	700966188	3.26e-08	2.44e-07
ENSDARG00000004402	-2467999822	6018955182	3.27e-08	2.44e-07
ENSDARG00000060785	-2390013338	7457541636	3.3e-08	2.46e-07
ENSDARG00000016505	2746824809	4787046003	3.36e-08	2.5e-07
ENSDARG00000094204	-2530074122	6182810032	3.43e-08	2.55e-07
ENSDARG00000017960	2392378592	6481790204	3.44e-08	2.56e-07
ENSDARG00000057721	-2643248123	5860072721	3.45e-08	2.56e-07
ENSDARG00000037309	3201129999	5886589309	3.53e-08	2.62e-07
ENSDARG00000070085	-2357038331	575720863	3.6e-08	2.67e-07
ENSDARG00000042310	2272890225	658588205	3.86e-08	2.86e-07
ENSDARG00000040712	-2382665642	5851570751	3.87e-08	2.86e-07
ENSDARG00000055893	-2504822801	5559885074	3.94e-08	2.91e-07
ENSDARG00000044914	2314108246	6352666833	3.96e-08	2.92e-07
ENSDARG00000015399	-2691774881	4809028803	4e-08	2.94e-07
ENSDARG00000008969	2669185042	5957834408	4.03e-08	2.97e-07
ENSDARG00000035120	-2471172691	7558636941	4.05e-08	2.98e-07
ENSDARG00000037229	2260858975	6641114173	4.05e-08	2.98e-07
ENSDARG00000042259	-2715861347	826876875	4.07e-08	2.98e-07
ENSDARG00000001968	-3237789997	5592415481	4.08e-08	2.99e-07
ENSDARG00000035549	-2293278836	6556861075	4.15e-08	3.04e-07
ENSDARG00000040535	3547572959	3177615448	4.18e-08	3.06e-07
ENSDARG00000036040	2432297997	575784566	4.21e-08	3.08e-07
ENSDARG00000062457	-2366846153	8189284448	4.24e-08	3.1e-07
ENSDARG00000004636	-2368020035	7932224483	4.28e-08	3.12e-07
ENSDARG00000062797	2987256623	4216869067	4.32e-08	3.15e-07
ENSDARG00000077251	-2964159439	4218083185	4.41e-08	3.21e-07
ENSDARG00000025518	3343052659	3594902253	4.43e-08	3.22e-07
ENSDARG00000043301	3328825471	3514223219	4.51e-08	3.28e-07
ENSDARG00000077080	-2341084736	5754485309	4.69e-08	3.4e-07
ENSDARG00000042617	2837961507	5106234556	4.7e-08	3.4e-07
ENSDARG00000058041	-2416859403	7727387465	4.73e-08	3.43e-07
ENSDARG00000015506	2303089769	6217401224	4.77e-08	3.45e-07
ENSDARG00000005057	2553530034	5404719558	4.83e-08	3.49e-07
ENSDARG00000000001	-263363085	4996204722	4.84e-08	3.5e-07
ENSDARG00000035596	248466784	5931521884	4.98e-08	3.59e-07
ENSDARG00000021808	2349325465	685393873	4.98e-08	3.59e-07
ENSDARG00000000384	-3101714323	5577295232	5.12e-08	3.68e-07
ENSDARG00000042469	2516185199	5289581285	5.12e-08	3.68e-07
ENSDARG00000062530	-2704726088	5113972699	5.25e-08	3.77e-07
ENSDARG00000032765	2369748778	8060705531	5.3e-08	3.8e-07
ENSDARG00000077139	325948947	3794232197	5.46e-08	3.92e-07
ENSDARG00000077495	2230641735	6888018096	5.51e-08	3.95e-07
ENSDARG00000030766	2556888133	5329949434	5.56e-08	3.98e-07
ENSDARG00000000019	233643821	7238014146	5.58e-08	3.98e-07
ENSDARG00000079046	-2807815362	6019173864	5.64e-08	4.03e-07
ENSDARG00000027807	246409257	5528491632	5.77e-08	4.12e-07
ENSDARG00000075362	3488482346	3022919279	5.87e-08	4.18e-07
ENSDARG00000018393	-2915641782	614007235	5.94e-08	4.23e-07
ENSDARG00000078069	2365640691	9193874669	6.12e-08	4.35e-07
ENSDARG00000077256	2485997681	7715852359	6.35e-08	4.51e-07
ENSDARG00000037713	-2367174429	7893359788	6.48e-08	4.6e-07
ENSDARG00000062020	2372183104	7496621158	6.65e-08	4.71e-07
ENSDARG00000058730	2340427922	6966289815	6.71e-08	4.75e-07
ENSDARG00000000804	337205389	3485007729	6.74e-08	4.77e-07
ENSDARG00000011582	2258848962	7039364992	6.81e-08	4.81e-07
ENSDARG00000010823	2323080312	5891190039	6.83e-08	4.83e-07
ENSDARG00000063068	3112354845	4543822317	7.04e-08	4.97e-07
ENSDARG00000055760	2302597822	7303316711	7.15e-08	5.04e-07
ENSDARG00000022564	-2156795905	6789900524	7.15e-08	5.04e-07
ENSDARG00000088083	-2482742328	6815813159	7.42e-08	5.22e-07
ENSDARG00000056331	2338953146	5972139621	7.57e-08	5.32e-07
ENSDARG00000086829	2336134546	5897546937	7.68e-08	5.39e-07
ENSDARG00000052383	2859738061	9634395895	7.75e-08	5.43e-07
ENSDARG00000061993	-2208563335	6722537742	7.83e-08	5.49e-07
ENSDARG00000053194	2757487017	4653552961	7.87e-08	5.51e-07
ENSDARG00000010169	-2335470559	5725122895	8.05e-08	5.63e-07
ENSDARG00000008413	2316167897	5977851344	8.2e-08	5.73e-07
ENSDARG00000030687	-3251018285	3570768336	8.23e-08	5.73e-07
ENSDARG00000014763	2604481068	9293997933	8.21e-08	5.73e-07
ENSDARG00000062968	223623597	700397816	8.23e-08	5.73e-07
ENSDARG00000012453	-2435266992	5526311025	8.39e-08	5.84e-07
ENSDARG00000052690	2447179985	6062205439	8.82e-08	6.13e-07
ENSDARG00000076754	2898788252	4207821804	8.85e-08	6.14e-07
ENSDARG00000010108	-2260777294	6441513294	8.99e-08	6.24e-07
ENSDARG00000078981	3635731279	3250272186	9.15e-08	6.34e-07
ENSDARG00000041421	2371201011	5963181797	9.2e-08	6.37e-07
ENSDARG00000005612	2377072768	6982386618	9.42e-08	6.52e-07
ENSDARG00000078003	2404351553	5583624105	9.48e-08	6.55e-07
ENSDARG00000023678	-2282958901	6333028276	9.5e-08	6.56e-07
ENSDARG00000033754	-2669464616	485762412	9.58e-08	6.61e-07
ENSDARG00000062323	3321784084	33072199	9.6e-08	6.61e-07
ENSDARG00000045910	2813981788	4540172472	9.7e-08	6.68e-07
ENSDARG00000075726	-2745673156	4319740941	9.81e-08	6.75e-07
ENSDARG00000062019	2796896702	4480746878	9.86e-08	6.78e-07
ENSDARG00000090243	-2368169	6606816228	1.02e-07	6.97e-07
ENSDARG00000005186	2323871559	6335155001	1.04e-07	7.15e-07
ENSDARG00000017803	2294946449	7443121399	1.06e-07	7.28e-07
ENSDARG00000008107	2286794788	6000973783	1.06e-07	7.29e-07
ENSDARG00000037654	2863281884	4597362512	1.1e-07	7.5e-07
ENSDARG00000058543	2488315673	7772614405	1.1e-07	7.5e-07
ENSDARG00000076118	2296792443	582194648	1.12e-07	7.65e-07
ENSDARG00000079578	3008960706	3964814905	1.15e-07	7.81e-07
ENSDARG00000012874	2210391674	6175300097	1.15e-07	7.85e-07
ENSDARG00000020948	-2124575149	681441188	1.16e-07	7.86e-07
ENSDARG00000070447	2314431396	6167427836	1.17e-07	7.94e-07
ENSDARG00000074166	2391447161	757533109	1.18e-07	7.99e-07
ENSDARG00000079872	3372094992	3532847401	1.19e-07	8.09e-07
ENSDARG00000059738	2354167105	8533500723	1.23e-07	8.31e-07
ENSDARG00000020473	-220225207	6973571035	1.25e-07	8.44e-07
ENSDARG00000046024	-2388217858	6246246021	1.25e-07	8.47e-07
ENSDARG00000061458	-2209225848	700913293	1.26e-07	8.51e-07
ENSDARG00000011961	2953131769	419658817	1.27e-07	8.6e-07
ENSDARG00000063191	-2296264813	580458703	1.29e-07	8.68e-07
ENSDARG00000061354	2329341047	5790954827	1.29e-07	8.71e-07
ENSDARG00000092305	2287845457	585198845	1.29e-07	8.71e-07
ENSDARG00000089888	-2303318879	5969163209	1.3e-07	8.76e-07
ENSDARG00000023821	2184439818	6968149805	1.31e-07	8.82e-07
ENSDARG00000012094	-2552778837	6280243304	1.32e-07	8.83e-07
ENSDARG00000087172	2568790539	7113561296	1.33e-07	8.91e-07
ENSDARG00000060948	3224091108	3287533263	1.33e-07	8.94e-07
ENSDARG00000060994	219480774	6357322207	1.34e-07	8.98e-07
ENSDARG00000014898	-2117465268	6794647332	1.34e-07	8.98e-07
ENSDARG00000061196	-3804516535	6759391858	1.35e-07	9e-07
ENSDARG00000024092	2346923524	5924137459	1.36e-07	9.07e-07
ENSDARG00000023190	2335954276	8551123386	1.38e-07	9.21e-07
ENSDARG00000045487	228812145	9287910242	1.38e-07	9.22e-07
ENSDARG00000001710	2465381669	5315385258	1.39e-07	9.26e-07
ENSDARG00000058799	-3120822745	3402718033	1.4e-07	9.32e-07
ENSDARG00000059983	-240658552	5406507649	1.43e-07	9.51e-07
ENSDARG00000001259	-3129521258	3000172455	1.47e-07	9.73e-07
ENSDARG00000023583	-2159992712	6415561138	1.51e-07	9.98e-07
ENSDARG00000060489	-2152042288	6976443156	1.51e-07	9.98e-07
ENSDARG00000057415	-301352496	4022288792	1.52e-07	1.01e-06
ENSDARG00000041665	-232684943	6155798464	1.52e-07	1.01e-06
ENSDARG00000014592	2450121566	6280592385	1.54e-07	1.02e-06
ENSDARG00000061916	3081665005	4316524521	1.54e-07	1.02e-06
ENSDARG00000061658	-215698555	7208649215	1.55e-07	1.02e-06
ENSDARG00000062821	-3161449725	293335271	1.57e-07	1.03e-06
ENSDARG00000059936	-230081185	6563555199	1.58e-07	1.04e-06
ENSDARG00000078479	-3285321204	4462277886	1.59e-07	1.05e-06
ENSDARG00000038505	2576254126	5190455828	1.59e-07	1.05e-06
ENSDARG00000073813	255164658	504192026	1.62e-07	1.07e-06
ENSDARG00000089717	-3761457123	3839400544	1.64e-07	1.07e-06
ENSDARG00000041599	2926446568	4203940437	1.67e-07	1.1e-06
ENSDARG00000058563	-2547087823	5210287027	1.72e-07	1.12e-06
ENSDARG00000051884	-2788661154	5899357311	1.73e-07	1.13e-06
ENSDARG00000058551	352332125	4275502039	1.73e-07	1.13e-06
ENSDARG00000021378	2302173155	6890965447	1.78e-07	1.16e-06
ENSDARG00000036577	-2478243853	803669726	1.79e-07	1.16e-06
ENSDARG00000059722	2266838338	5912676515	1.78e-07	1.16e-06
ENSDARG00000060537	220364013	7528180535	1.79e-07	1.16e-06
ENSDARG00000075281	2921781136	3886655108	1.81e-07	1.18e-06
ENSDARG00000074490	2365819583	5893970211	1.85e-07	1.2e-06
ENSDARG00000042690	2573088499	651853449	1.88e-07	1.22e-06
ENSDARG00000062122	-3078131235	3776339908	1.9e-07	1.23e-06
ENSDARG00000026804	363636631	3132247344	1.92e-07	1.25e-06
ENSDARG00000069478	-251131406	4797527029	1.94e-07	1.26e-06
ENSDARG00000003933	-2231094409	8212992521	1.97e-07	1.27e-06
ENSDARG00000052154	-2231804257	5767606596	2e-07	1.29e-06
ENSDARG00000023868	-3050991447	4168681099	2.03e-07	1.31e-06
ENSDARG00000017500	2131904152	7033367913	2.11e-07	1.36e-06
ENSDARG00000078433	-2085452674	6694048537	2.12e-07	1.37e-06
ENSDARG00000052279	2277370129	6406696281	2.18e-07	1.4e-06
ENSDARG00000059304	-2316332043	8252380228	2.2e-07	1.42e-06
ENSDARG00000040559	-2116136085	6295857491	2.23e-07	1.43e-06
ENSDARG00000086138	-2640670888	4549996472	2.24e-07	1.44e-06
ENSDARG00000016375	2240564987	8291246063	2.25e-07	1.44e-06
ENSDARG00000000779	2694136103	4821147308	2.29e-07	1.47e-06
ENSDARG00000016813	3141470294	3352012529	2.4e-07	1.54e-06
ENSDARG00000077641	2657088215	4434278629	2.42e-07	1.55e-06
ENSDARG00000068214	2608531479	8037763369	2.43e-07	1.55e-06
ENSDARG00000059388	-2380440904	5290907793	2.48e-07	1.58e-06
ENSDARG00000070417	-2687342196	4411994754	2.52e-07	1.61e-06
ENSDARG00000010771	2238068617	7790654125	2.62e-07	1.67e-06
ENSDARG00000061757	2287306474	5612331967	2.63e-07	1.68e-06
ENSDARG00000074680	3389915871	3039835466	2.65e-07	1.69e-06
ENSDARG00000028625	2237404133	5843713952	2.65e-07	1.69e-06
ENSDARG00000063466	2134466934	6215545011	2.71e-07	1.72e-06
ENSDARG00000040123	-3195272065	3128624812	2.72e-07	1.72e-06
ENSDARG00000042389	300581566	8735661103	2.76e-07	1.75e-06
ENSDARG00000022712	-2363974241	7204823497	2.77e-07	1.76e-06
ENSDARG00000043728	-2180366843	573901521	2.85e-07	1.81e-06
ENSDARG00000089591	-2870964282	6565257626	2.86e-07	1.81e-06
ENSDARG00000056966	2539301281	4961149626	2.87e-07	1.82e-06
ENSDARG00000062594	-2825007804	5134146369	2.92e-07	1.84e-06
ENSDARG00000079634	2700846934	4382306136	2.98e-07	1.88e-06
ENSDARG00000045485	2209611191	6389560043	2.99e-07	1.89e-06
ENSDARG00000041113	-2200628717	8035298576	3.04e-07	1.92e-06
ENSDARG00000004931	3254946052	3606861413	3.08e-07	1.94e-06
ENSDARG00000016765	2596237962	4606473404	3.1e-07	1.95e-06
ENSDARG00000035148	-2944020183	3541687917	3.11e-07	1.96e-06
ENSDARG00000059329	-2527747489	5772084253	3.13e-07	1.96e-06
ENSDARG00000029783	2291760311	6442400648	3.14e-07	1.97e-06
ENSDARG00000077782	-2934971596	4036350129	3.16e-07	1.98e-06
ENSDARG00000007657	-231576118	5440358694	3.2e-07	2e-06
ENSDARG00000017757	-2500607041	4685463266	3.21e-07	2.01e-06
ENSDARG00000009875	-2209506306	5654136941	3.27e-07	2.04e-06
ENSDARG00000010025	-203111808	6727162742	3.3e-07	2.06e-06
ENSDARG00000020964	-2262192467	7365823906	3.33e-07	2.08e-06
ENSDARG00000043177	-2269503404	5712645753	3.42e-07	2.13e-06
ENSDARG00000013581	-229928373	5412362117	3.43e-07	2.14e-06
ENSDARG00000026376	-2931845233	6935615438	3.49e-07	2.17e-06
ENSDARG00000062887	-2939726552	5765993059	3.54e-07	2.2e-06
ENSDARG00000031382	2700976204	4522097467	3.59e-07	2.23e-06
ENSDARG00000042159	-2959244346	3231351726	3.61e-07	2.24e-06
ENSDARG00000075853	2665125903	4342483427	3.67e-07	2.28e-06
ENSDARG00000059125	2558684724	5289774706	3.75e-07	2.33e-06
ENSDARG00000039987	2650214443	4773221768	3.78e-07	2.34e-06
ENSDARG00000074086	-3364221847	3457847096	3.81e-07	2.35e-06
ENSDARG00000076733	-2285503527	5608313383	3.81e-07	2.35e-06
ENSDARG00000078762	-2699368652	4143762689	3.92e-07	2.42e-06
ENSDARG00000074589	2502694717	6754000898	4e-07	2.47e-06
ENSDARG00000005606	2056188362	6712525955	4.03e-07	2.49e-06
ENSDARG00000070698	-2258059932	6085326733	4.04e-07	2.49e-06
ENSDARG00000004406	-204460354	6628917419	4.09e-07	2.52e-06
ENSDARG00000043821	2914712059	3629849648	4.11e-07	2.52e-06
ENSDARG00000008890	-2364546599	5021961947	4.11e-07	2.52e-06
ENSDARG00000060745	-2734715475	4551016296	4.17e-07	2.56e-06
ENSDARG00000040238	2365865961	5233762723	4.2e-07	2.57e-06
ENSDARG00000061986	-2141176252	5978797366	4.2e-07	2.57e-06
ENSDARG00000028661	2354091248	5224741303	4.22e-07	2.58e-06
ENSDARG00000040674	2294053496	5662331037	4.26e-07	2.6e-06
ENSDARG00000041736	-2512611409	4670970173	4.46e-07	2.72e-06
ENSDARG00000073696	2408227454	6923100149	4.49e-07	2.74e-06
ENSDARG00000070474	2176521517	8509710618	4.49e-07	2.74e-06
ENSDARG00000059760	-2219745982	5653445625	4.55e-07	2.77e-06
ENSDARG00000052674	-2204147636	1053906435	4.58e-07	2.79e-06
ENSDARG00000045036	-2293609753	5547978837	4.6e-07	2.8e-06
ENSDARG00000040291	2673889762	460169153	4.62e-07	2.81e-06
ENSDARG00000018721	2988668879	368201819	4.64e-07	2.82e-06
ENSDARG00000003127	2161798881	6547711768	4.69e-07	2.85e-06
ENSDARG00000093093	-2442600182	4835579162	4.71e-07	2.86e-06
ENSDARG00000019137	2093138413	7149139503	4.72e-07	2.86e-06
ENSDARG00000078694	2629653129	4496660172	4.77e-07	2.89e-06
ENSDARG00000061379	2984784963	3440046258	4.79e-07	2.9e-06
ENSDARG00000052164	-2756123793	5603197944	4.84e-07	2.92e-06
ENSDARG00000026068	-2142298233	6551620806	4.89e-07	2.95e-06
ENSDARG00000036721	2143238803	5823845187	4.93e-07	2.97e-06
ENSDARG00000035831	-2628132294	7286473311	4.94e-07	2.98e-06
ENSDARG00000016139	-2397127939	5006780634	4.97e-07	2.99e-06
ENSDARG00000031102	-2351409032	5455282194	4.98e-07	2.99e-06
ENSDARG00000053954	2015459582	6736673382	5.09e-07	3.06e-06
ENSDARG00000055974	-2779778979	4028017827	5.1e-07	3.06e-06
ENSDARG00000042974	33154099	2654766473	5.13e-07	3.08e-06
ENSDARG00000053485	-2252661171	937583008	5.18e-07	3.1e-06
ENSDARG00000015681	2200172277	7626976833	5.19e-07	3.11e-06
ENSDARG00000052348	2201555278	8657421725	5.24e-07	3.14e-06
ENSDARG00000074307	3082843061	3420237579	5.35e-07	3.2e-06
ENSDARG00000008623	-2013629251	6762915365	5.35e-07	3.2e-06
ENSDARG00000013845	2102082687	6173909473	5.43e-07	3.24e-06
ENSDARG00000056794	-2198337265	7158709614	5.45e-07	3.25e-06
ENSDARG00000073892	-2384578055	5567572566	5.46e-07	3.25e-06
ENSDARG00000041232	424276882	7947641955	5.51e-07	3.28e-06
ENSDARG00000053517	4155564794	330822673	5.6e-07	3.33e-06
ENSDARG00000022413	-2791789756	4123862921	5.69e-07	3.38e-06
ENSDARG00000056450	-2443896008	5445453512	5.7e-07	3.38e-06
ENSDARG00000004714	2157323401	7617652155	5.72e-07	3.39e-06
ENSDARG00000062662	2582847326	4325288114	5.74e-07	3.4e-06
ENSDARG00000007764	2292343285	5365743041	5.77e-07	3.42e-06
ENSDARG00000032298	-2622907908	4613145763	5.78e-07	3.42e-06
ENSDARG00000017820	-2116901607	6098517354	5.81e-07	3.44e-06
ENSDARG00000024465	2482792807	5550330849	5.88e-07	3.48e-06
ENSDARG00000069147	-2347601965	4840978758	5.89e-07	3.48e-06
ENSDARG00000059950	211586536	6736811699	5.96e-07	3.52e-06
ENSDARG00000011122	2395700336	4899906625	5.97e-07	3.52e-06
ENSDARG00000079244	-2301504961	5222919332	5.97e-07	3.52e-06
ENSDARG00000043471	-2355190792	5127057269	5.98e-07	3.52e-06
ENSDARG00000009438	2054848722	6536631169	5.99e-07	3.53e-06
ENSDARG00000035352	2419659865	5346857727	6.05e-07	3.55e-06
ENSDARG00000063509	-2308610155	579819567	6.1e-07	3.58e-06
ENSDARG00000010610	-2464843303	4620979373	6.11e-07	3.59e-06
ENSDARG00000061223	3315322789	2538500368	6.14e-07	3.6e-06
ENSDARG00000069283	2464027664	4736310247	6.15e-07	3.6e-06
ENSDARG00000042934	2202219049	6958598808	6.32e-07	3.7e-06
ENSDARG00000077081	2049899396	6388173478	6.46e-07	3.78e-06
ENSDARG00000060189	382568802	4999531112	6.48e-07	3.79e-06
ENSDARG00000006924	-2036191245	7044237346	6.67e-07	3.9e-06
ENSDARG00000035149	-233033841	5276766883	7.01e-07	4.09e-06
ENSDARG00000021885	-2755561071	3620920182	7.02e-07	4.1e-06
ENSDARG00000013057	2630442289	4922745367	7.06e-07	4.11e-06
ENSDARG00000059630	2117040169	7519572679	7.07e-07	4.12e-06
ENSDARG00000075416	-2927999988	3841260912	7.24e-07	4.21e-06
ENSDARG00000009480	-2378948527	6579103905	7.27e-07	4.22e-06
ENSDARG00000035823	2051421123	6209372171	7.3e-07	4.24e-06
ENSDARG00000058202	249167741	4785716758	7.42e-07	4.31e-06
ENSDARG00000011830	2326254882	5450097886	7.43e-07	4.31e-06
ENSDARG00000036990	2366522366	4988130123	7.48e-07	4.33e-06
ENSDARG00000088774	3222764362	3730809644	7.79e-07	4.51e-06
ENSDARG00000062955	-2564989525	464097916	7.8e-07	4.51e-06
ENSDARG00000015073	2732419188	4317611712	7.89e-07	4.56e-06
ENSDARG00000016116	2857282042	3579680141	7.96e-07	4.6e-06
ENSDARG00000018921	2634933239	4649636322	8.01e-07	4.62e-06
ENSDARG00000035427	-2074846371	7432743592	8.05e-07	4.64e-06
ENSDARG00000078016	-2099435385	6235777729	8.3e-07	4.78e-06
ENSDARG00000005559	313917584	3217454946	8.32e-07	4.79e-06
ENSDARG00000019185	3504492749	2712866218	8.41e-07	4.84e-06
ENSDARG00000041921	204200873	6165044616	8.54e-07	4.9e-06
ENSDARG00000022218	-2740271755	3968150822	8.71e-07	4.99e-06
ENSDARG00000056627	2400722795	7107255645	8.7e-07	4.99e-06
ENSDARG00000009802	2089814904	6218520797	8.69e-07	4.99e-06
ENSDARG00000053918	-2210354356	6779383911	8.74e-07	5e-06
ENSDARG00000036107	2109862353	7411505375	8.74e-07	5e-06
ENSDARG00000055314	1970932279	6794815042	8.77e-07	5.01e-06
ENSDARG00000063147	227483706	7106579856	8.82e-07	5.04e-06
ENSDARG00000068755	2390751476	4783690126	8.88e-07	5.07e-06
ENSDARG00000053656	259795564	8934183822	8.9e-07	5.08e-06
ENSDARG00000004218	2261504708	640560616	9.02e-07	5.14e-06
ENSDARG00000055045	3631137292	6406805644	9.17e-07	5.22e-06
ENSDARG00000019353	210163346	8634816347	9.19e-07	5.23e-06
ENSDARG00000052124	2241695291	5280319332	9.22e-07	5.24e-06
ENSDARG00000079672	2245121409	5204949696	9.25e-07	5.26e-06
ENSDARG00000031985	2501310182	5429999545	9.3e-07	5.28e-06
ENSDARG00000020494	2056717092	6136925153	9.3e-07	5.28e-06
ENSDARG00000019302	2947373587	3952835406	9.32e-07	5.28e-06
ENSDARG00000057089	2644724586	4127391711	9.38e-07	5.31e-06
ENSDARG00000079811	-2524520352	5847923991	9.38e-07	5.31e-06
ENSDARG00000007271	2016147941	652993275	9.47e-07	5.36e-06
ENSDARG00000001890	2217163117	8532893241	9.52e-07	5.38e-06
ENSDARG00000090840	2872186532	4988837323	9.72e-07	5.48e-06
ENSDARG00000003751	-2018631101	6522702861	9.82e-07	5.54e-06
ENSDARG00000032552	-2252021802	5493854173	9.85e-07	5.55e-06
ENSDARG00000045567	-2007698402	6356731681	9.85e-07	5.55e-06
ENSDARG00000091367	-2094203462	7234562524	9.98e-07	5.61e-06
ENSDARG00000005959	-3154845052	3597083684	1e-06	5.63e-06
ENSDARG00000054290	2100562425	9231620145	1e-06	5.64e-06
ENSDARG00000088210	-2088262415	7177612684	1.02e-06	5.72e-06
ENSDARG00000061454	-2630023367	4901402232	1.02e-06	5.72e-06
ENSDARG00000071501	-2062290693	5761436647	1.04e-06	5.8e-06
ENSDARG00000017781	-2015206148	7354522779	1.06e-06	5.95e-06
ENSDARG00000001969	-2125138897	6392221238	1.09e-06	6.1e-06
ENSDARG00000077471	-2294035215	485078674	1.1e-06	6.15e-06
ENSDARG00000024818	258984695	4211400473	1.1e-06	6.16e-06
ENSDARG00000040121	-2194332212	812578855	1.11e-06	6.22e-06
ENSDARG00000076238	3006372248	3163575734	1.12e-06	6.24e-06
ENSDARG00000017010	2563948514	4289872768	1.14e-06	6.33e-06
ENSDARG00000077010	-2135232677	5722640672	1.14e-06	6.37e-06
ENSDARG00000007127	2222549998	5845862141	1.15e-06	6.39e-06
ENSDARG00000058003	2475453533	5035510316	1.15e-06	6.42e-06
ENSDARG00000055536	206154655	6030860359	1.16e-06	6.46e-06
ENSDARG00000010160	2121498754	9615529501	1.18e-06	6.52e-06
ENSDARG00000025535	2124700962	7290558824	1.19e-06	6.6e-06
ENSDARG00000061684	-3108722703	3927752222	1.19e-06	6.62e-06
ENSDARG00000041332	203593503	6402349983	1.19e-06	6.62e-06
ENSDARG00000044484	2103156457	6334697561	1.2e-06	6.66e-06
ENSDARG00000011545	2036750632	7056328977	1.2e-06	6.66e-06
ENSDARG00000011637	1970354363	6647303518	1.21e-06	6.67e-06
ENSDARG00000033498	-2668090748	4083960589	1.23e-06	6.78e-06
ENSDARG00000075169	-2401195132	4511609759	1.24e-06	6.84e-06
ENSDARG00000043944	1970820371	7032009764	1.24e-06	6.85e-06
ENSDARG00000070722	-207464427	8422871666	1.28e-06	7.08e-06
ENSDARG00000091603	-2968932486	3381666397	1.31e-06	7.21e-06
ENSDARG00000077778	-1990433253	6189247369	1.31e-06	7.22e-06
ENSDARG00000041068	-2096770005	5636478249	1.32e-06	7.26e-06
ENSDARG00000079684	-2024755808	6168193359	1.33e-06	7.33e-06
ENSDARG00000094175	2135481229	573568532	1.34e-06	7.37e-06
ENSDARG00000021820	-2786200594	3214001834	1.34e-06	7.38e-06
ENSDARG00000056679	2430924879	4715162851	1.4e-06	7.68e-06
ENSDARG00000043457	2213620196	8237672707	1.43e-06	7.8e-06
ENSDARG00000076987	-2985442097	383632949	1.44e-06	7.88e-06
ENSDARG00000071449	1972936776	690789084	1.44e-06	7.89e-06
ENSDARG00000002682	244472794	4379629537	1.46e-06	7.99e-06
ENSDARG00000058208	2605409594	4090877186	1.46e-06	8e-06
ENSDARG00000019622	2833896623	3516615277	1.49e-06	8.14e-06
ENSDARG00000022918	-2121713444	5726294589	1.49e-06	8.14e-06
ENSDARG00000037865	3523218678	2812631018	1.5e-06	8.17e-06
ENSDARG00000042630	2194611373	5637261227	1.5e-06	8.19e-06
ENSDARG00000038305	2588658807	4131426871	1.52e-06	8.24e-06
ENSDARG00000018602	208227676	704503765	1.56e-06	8.49e-06
ENSDARG00000011422	2067222458	6184541347	1.56e-06	8.5e-06
ENSDARG00000027600	2049589491	7201171459	1.57e-06	8.5e-06
ENSDARG00000058284	3033917573	2894482746	1.57e-06	8.5e-06
ENSDARG00000068650	214100474	582470398	1.58e-06	8.55e-06
ENSDARG00000062585	-207300847	579019203	1.58e-06	8.55e-06
ENSDARG00000039255	2141175431	6894553467	1.58e-06	8.56e-06
ENSDARG00000013009	-1960454409	6409826307	1.59e-06	8.58e-06
ENSDARG00000075657	-2157128759	6167106979	1.62e-06	8.77e-06
ENSDARG00000029014	219587642	5421854927	1.64e-06	8.84e-06
ENSDARG00000095002	5205205673	4570833675	1.65e-06	8.88e-06
ENSDARG00000037245	-2610277614	3952259645	1.65e-06	8.88e-06
ENSDARG00000021720	2746921248	4373567614	1.72e-06	9.24e-06
ENSDARG00000075328	-1966082385	6442880207	1.74e-06	9.35e-06
ENSDARG00000013667	2432714178	4538596642	1.74e-06	9.38e-06
ENSDARG00000026454	-208365843	7409675201	1.77e-06	9.5e-06
ENSDARG00000077536	2085966827	8590159782	1.78e-06	9.57e-06
ENSDARG00000042344	-2017498152	6247383391	1.79e-06	9.59e-06
ENSDARG00000002249	-2619011311	3796274312	1.8e-06	9.62e-06
ENSDARG00000061417	-2546479387	3932136842	1.82e-06	9.75e-06
ENSDARG00000021163	2728574096	3868615299	1.84e-06	9.83e-06
ENSDARG00000004261	277817288	9627084538	1.84e-06	9.86e-06
ENSDARG00000026985	2168563487	7356142508	1.85e-06	9.88e-06
ENSDARG00000019845	-2032829848	8066607675	1.92e-06	1.02e-05
ENSDARG00000028087	-2115758775	7734104157	1.93e-06	1.03e-05
ENSDARG00000019949	2172500145	8988139992	2e-06	1.07e-05
ENSDARG00000074137	-1962583239	619034716	2e-06	1.07e-05
ENSDARG00000070387	3095437629	2674430671	2.07e-06	1.1e-05
ENSDARG00000057770	2316666404	8629096033	2.08e-06	1.11e-05
ENSDARG00000036900	3811130822	5590280109	2.1e-06	1.12e-05
ENSDARG00000045580	3071470182	4262340441	2.1e-06	1.12e-05
ENSDARG00000078546	2654619075	3766632002	2.13e-06	1.13e-05
ENSDARG00000009958	2034700662	609748048	2.15e-06	1.14e-05
ENSDARG00000070617	-2161349232	5349977912	2.18e-06	1.15e-05
ENSDARG00000074245	2021844948	5999067671	2.19e-06	1.16e-05
ENSDARG00000011821	1987191539	6089168875	2.19e-06	1.16e-05
ENSDARG00000043307	-2148529403	5187539229	2.2e-06	1.17e-05
ENSDARG00000045147	200365725	6537207746	2.24e-06	1.18e-05
ENSDARG00000053496	2147248077	5986519526	2.24e-06	1.18e-05
ENSDARG00000034473	2073459115	8298308835	2.26e-06	1.19e-05
ENSDARG00000037930	2592050228	3937475275	2.26e-06	1.19e-05
ENSDARG00000074742	-2725280607	4018508606	2.27e-06	1.2e-05
ENSDARG00000005185	-2007047758	7598777084	2.27e-06	1.2e-05
ENSDARG00000012141	2121419026	770499623	2.28e-06	1.2e-05
ENSDARG00000041373	-2351337742	6324448092	2.3e-06	1.21e-05
ENSDARG00000078891	2353543942	4648867007	2.3e-06	1.21e-05
ENSDARG00000070643	20013411	7252114595	2.33e-06	1.22e-05
ENSDARG00000078105	1926819244	6239204016	2.38e-06	1.25e-05
ENSDARG00000040623	2549050428	5629773124	2.41e-06	1.26e-05
ENSDARG00000068596	-2032009239	7935675775	2.44e-06	1.28e-05
ENSDARG00000089957	3076288066	2655647697	2.46e-06	1.29e-05
ENSDARG00000055381	-2016019992	768278094	2.47e-06	1.29e-05
ENSDARG00000045802	-1871366537	68233469	2.48e-06	1.29e-05
ENSDARG00000087109	-204475388	6945190499	2.54e-06	1.33e-05
ENSDARG00000019444	2017577394	8139562824	2.54e-06	1.33e-05
ENSDARG00000077174	-1988623854	6362699147	2.55e-06	1.33e-05
ENSDARG00000016143	-1954175043	6123029049	2.57e-06	1.34e-05
ENSDARG00000091304	-2552078344	4450347005	2.62e-06	1.37e-05
ENSDARG00000062753	-2980676254	429664374	2.64e-06	1.37e-05
ENSDARG00000068831	1934582542	6926159556	2.65e-06	1.38e-05
ENSDARG00000012248	2096356721	7977534441	2.66e-06	1.38e-05
ENSDARG00000060661	1993808178	5768607822	2.67e-06	1.39e-05
ENSDARG00000009557	2316459854	493678856	2.68e-06	1.39e-05
ENSDARG00000057737	2246738839	5413766121	2.69e-06	1.39e-05
ENSDARG00000078515	-2698221322	4240740424	2.7e-06	1.4e-05
ENSDARG00000092979	1985438622	6119134495	2.74e-06	1.42e-05
ENSDARG00000004060	2048768125	6974514945	2.84e-06	1.47e-05
ENSDARG00000078094	-2109482228	5252790966	2.84e-06	1.47e-05
ENSDARG00000070006	-1969626794	6995546469	2.91e-06	1.5e-05
ENSDARG00000004988	2863428383	3836152056	2.92e-06	1.51e-05
ENSDARG00000068822	-2404540754	6587273115	2.92e-06	1.51e-05
ENSDARG00000079679	-2590978447	3744803851	2.94e-06	1.51e-05
ENSDARG00000011648	-2022972043	8885652304	2.94e-06	1.51e-05
ENSDARG00000003531	1878892648	6750511665	2.94e-06	1.51e-05
ENSDARG00000045493	-1929312166	6252910905	2.95e-06	1.52e-05
ENSDARG00000060112	-2668263332	3131856152	2.98e-06	1.53e-05
ENSDARG00000037000	2825202077	5169914188	3e-06	1.54e-05
ENSDARG00000051931	2049922843	7115910011	3.01e-06	1.54e-05
ENSDARG00000068103	3114336336	2684163119	3.06e-06	1.57e-05
ENSDARG00000038802	-2130555756	6543648575	3.08e-06	1.58e-05
ENSDARG00000011473	220627209	4866105	3.14e-06	1.61e-05
ENSDARG00000091610	-1965308549	6899033145	3.15e-06	1.61e-05
ENSDARG00000016710	-1891520595	6284403324	3.17e-06	1.62e-05
ENSDARG00000004672	2125723582	6642144914	3.21e-06	1.64e-05
ENSDARG00000031317	-2015613553	8642763863	3.21e-06	1.64e-05
ENSDARG00000078348	2070912599	746564106	3.33e-06	1.7e-05
ENSDARG00000026629	2127556692	5896075167	3.36e-06	1.71e-05
ENSDARG00000093469	-2750704648	2916744528	3.38e-06	1.72e-05
ENSDARG00000021439	-2039844064	9181412211	3.41e-06	1.74e-05
ENSDARG00000059735	-2443716777	4323864754	3.42e-06	1.74e-05
ENSDARG00000057583	2005656824	8816296866	3.44e-06	1.75e-05
ENSDARG00000000142	2199972001	5291266604	3.44e-06	1.75e-05
ENSDARG00000071774	-1963443248	6181625769	3.46e-06	1.76e-05
ENSDARG00000060437	2733770344	3669712197	3.52e-06	1.79e-05
ENSDARG00000062421	-2592401079	3479585287	3.53e-06	1.79e-05
ENSDARG00000074266	-1985370927	5701505602	3.53e-06	1.79e-05
ENSDARG00000070097	1947899155	6127388025	3.56e-06	1.8e-05
ENSDARG00000037634	-1885426854	7184397725	3.56e-06	1.8e-05
ENSDARG00000058259	-1976011042	8840466568	3.6e-06	1.82e-05
ENSDARG00000038881	-1938293829	7603780003	3.62e-06	1.83e-05
ENSDARG00000052846	2010206164	7235433206	3.65e-06	1.84e-05
ENSDARG00000002021	-1908277578	6263814998	3.69e-06	1.86e-05
ENSDARG00000006235	2035864967	6626645293	3.71e-06	1.87e-05
ENSDARG00000009779	-1905969603	7360528193	3.77e-06	1.9e-05
ENSDARG00000078075	2047126767	6924363392	3.79e-06	1.91e-05
ENSDARG00000075526	-1903729183	7087418742	3.79e-06	1.91e-05
ENSDARG00000002213	-2069777182	5438702193	3.81e-06	1.91e-05
ENSDARG00000088073	-2023716061	6201265118	3.81e-06	1.91e-05
ENSDARG00000037057	-1968942678	5828389356	3.88e-06	1.95e-05
ENSDARG00000011743	1933759103	6207962036	3.89e-06	1.95e-05
ENSDARG00000088574	-2026044777	9160940916	3.9e-06	1.95e-05
ENSDARG00000040265	1996000362	59635281	3.9e-06	1.95e-05
ENSDARG00000091777	-2037860507	5869172325	3.91e-06	1.96e-05
ENSDARG00000033138	2871910389	3832137721	3.97e-06	1.99e-05
ENSDARG00000077823	-2055318795	5491867657	3.99e-06	1.99e-05
ENSDARG00000077330	-2627891503	3221969783	4.1e-06	2.05e-05
ENSDARG00000038737	-1985584297	8215934814	4.18e-06	2.09e-05
ENSDARG00000062562	-2493680057	4209170202	4.22e-06	2.1e-05
ENSDARG00000068702	2602553907	3793582692	4.23e-06	2.11e-05
ENSDARG00000079173	-2408887376	5182390759	4.24e-06	2.11e-05
ENSDARG00000059961	-1885151484	7155253232	4.28e-06	2.13e-05
ENSDARG00000004780	2635442993	3890235298	4.31e-06	2.14e-05
ENSDARG00000018285	2011979728	6499945101	4.31e-06	2.14e-05
ENSDARG00000007169	2503370763	4167608535	4.35e-06	2.16e-05
ENSDARG00000032985	-1858557411	6235675772	4.36e-06	2.16e-05
ENSDARG00000094646	2114418722	7292646254	4.4e-06	2.18e-05
ENSDARG00000040111	1881650261	6946927694	4.43e-06	2.2e-05
ENSDARG00000053066	-228578574	4837975083	4.48e-06	2.22e-05
ENSDARG00000007277	-1967676855	6054626639	4.5e-06	2.23e-05
ENSDARG00000012025	1967149733	7192338926	4.5e-06	2.23e-05
ENSDARG00000062553	2076259675	5308362557	4.51e-06	2.23e-05
ENSDARG00000029805	-19574311	6440724571	4.51e-06	2.23e-05
ENSDARG00000045836	2061903457	5689313396	4.55e-06	2.25e-05
ENSDARG00000076485	2845766166	2876371511	4.57e-06	2.26e-05
ENSDARG00000061372	-1843709601	6689723532	4.58e-06	2.26e-05
ENSDARG00000078222	2832948228	335448154	4.6e-06	2.26e-05
ENSDARG00000075434	-1872490386	7119087976	4.62e-06	2.27e-05
ENSDARG00000070623	2081483366	5323431492	4.63e-06	2.28e-05
ENSDARG00000003682	190357189	6427604841	4.7e-06	2.31e-05
ENSDARG00000020123	1942605368	6163627726	4.77e-06	2.34e-05
ENSDARG00000059939	-2475867453	3762779036	4.81e-06	2.36e-05
ENSDARG00000053876	-218350532	4931671554	4.81e-06	2.36e-05
ENSDARG00000013414	3948272441	3641737214	4.82e-06	2.36e-05
ENSDARG00000054906	215836199	7760275707	4.85e-06	2.38e-05
ENSDARG00000042027	-1913994543	5868494388	4.91e-06	2.4e-05
ENSDARG00000040606	1944893194	7665487328	4.94e-06	2.42e-05
ENSDARG00000041204	-2287866054	5246319682	4.98e-06	2.44e-05
ENSDARG00000070230	2472374468	4963885288	5.1e-06	2.49e-05
ENSDARG00000005359	2007550777	7772608394	5.14e-06	2.51e-05
ENSDARG00000055763	21310993	7621956648	5.14e-06	2.51e-05
ENSDARG00000014005	-2313395318	5172336912	5.24e-06	2.55e-05
ENSDARG00000052082	-2101706489	5867623497	5.29e-06	2.58e-05
ENSDARG00000037960	2202250365	4892642137	5.32e-06	2.59e-05
ENSDARG00000059529	-2230555707	4710086164	5.41e-06	2.63e-05
ENSDARG00000058666	2341473458	4483995106	5.5e-06	2.67e-05
ENSDARG00000039256	-1895792415	6043329241	5.57e-06	2.7e-05
ENSDARG00000070271	-1994325213	6259269578	5.65e-06	2.75e-05
ENSDARG00000039913	1915002382	5854669775	5.74e-06	2.79e-05
ENSDARG00000058835	2824726514	2859284486	5.83e-06	2.82e-05
ENSDARG00000017315	-1898219531	6648863223	5.83e-06	2.82e-05
ENSDARG00000077237	-179245067	6736124447	5.83e-06	2.82e-05
ENSDARG00000042308	1910599477	5795183582	5.86e-06	2.84e-05
ENSDARG00000002536	1880272401	6517417307	5.9e-06	2.85e-05
ENSDARG00000044034	-2457023437	3772971134	5.92e-06	2.86e-05
ENSDARG00000076381	3587064425	4471799742	5.93e-06	2.86e-05
ENSDARG00000061665	2514412724	4075631995	6.05e-06	2.92e-05
ENSDARG00000043586	-3243341601	4195372801	6.18e-06	2.98e-05
ENSDARG00000075857	-2058373323	5199263379	6.21e-06	2.99e-05
ENSDARG00000014430	187679869	6103198352	6.26e-06	3.01e-05
ENSDARG00000053439	1966610259	8384347489	6.34e-06	3.05e-05
ENSDARG00000013838	1982501833	571120057	6.44e-06	3.1e-05
ENSDARG00000017953	-2565326064	3854020385	6.45e-06	3.1e-05
ENSDARG00000011777	184994126	7119273386	6.5e-06	3.12e-05
ENSDARG00000008472	-2112547087	5559027134	6.52e-06	3.13e-05
ENSDARG00000055649	3531674265	4868201848	6.54e-06	3.14e-05
ENSDARG00000078199	-2142720764	492358148	6.54e-06	3.14e-05
ENSDARG00000003084	2852061619	4163595121	6.66e-06	3.19e-05
ENSDARG00000030498	-2270674095	5845504797	6.67e-06	3.19e-05
ENSDARG00000055502	-1938206643	7976999687	6.7e-06	3.2e-05
ENSDARG00000078894	2966873085	2816271362	6.81e-06	3.25e-05
ENSDARG00000074895	-2457430555	3629524884	6.81e-06	3.25e-05
ENSDARG00000088890	-2209215707	6064886503	6.89e-06	3.29e-05
ENSDARG00000068246	1931691379	6028861358	6.92e-06	3.3e-05
ENSDARG00000013477	-1835279725	6381780026	6.93e-06	3.3e-05
ENSDARG00000060775	-2692768042	3300800713	7.13e-06	3.39e-05
ENSDARG00000016307	-1926828783	6173244048	7.14e-06	3.4e-05
ENSDARG00000056964	1788968681	676922558	7.14e-06	3.4e-05
ENSDARG00000060551	-2798151089	3818707884	7.19e-06	3.42e-05
ENSDARG00000039513	-2413279423	4076090547	7.2e-06	3.42e-05
ENSDARG00000039563	2042421741	5440603807	7.27e-06	3.45e-05
ENSDARG00000021557	1960187401	5770374693	7.29e-06	3.46e-05
ENSDARG00000036158	-1834487099	6498388041	7.32e-06	3.47e-05
ENSDARG00000076283	-2187916229	7845875196	7.37e-06	3.49e-05
ENSDARG00000019699	-1946855317	7202058657	7.37e-06	3.49e-05
ENSDARG00000059923	2854732469	3553496108	7.38e-06	3.49e-05
ENSDARG00000079756	1828431188	7032969177	7.39e-06	3.5e-05
ENSDARG00000033928	1866256592	6964314082	7.44e-06	3.52e-05
ENSDARG00000041311	2749174694	31178983	7.47e-06	3.53e-05
ENSDARG00000071685	2916017592	3211547247	7.51e-06	3.55e-05
ENSDARG00000007889	-2620796328	4010855675	7.52e-06	3.55e-05
ENSDARG00000033489	1881857291	5867594999	7.6e-06	3.58e-05
ENSDARG00000003920	1953809232	1002002716	7.71e-06	3.63e-05
ENSDARG00000079990	2617279471	3463823584	7.73e-06	3.64e-05
ENSDARG00000017329	2275982959	45632958	7.73e-06	3.64e-05
ENSDARG00000062381	2589806409	5415092306	7.77e-06	3.65e-05
ENSDARG00000068028	1837502212	7272306921	7.93e-06	3.73e-05
ENSDARG00000016238	-1939315517	6246282418	8e-06	3.76e-05
ENSDARG00000063075	1862978876	7554242906	8.06e-06	3.78e-05
ENSDARG00000079124	-2190712899	4542404411	8.08e-06	3.79e-05
ENSDARG00000022633	2026778368	6040286788	8.22e-06	3.85e-05
ENSDARG00000075437	1809377926	6766775681	8.32e-06	3.9e-05
ENSDARG00000089225	-1926310222	6394619697	8.35e-06	3.91e-05
ENSDARG00000058454	1924025581	8403118479	8.36e-06	3.91e-05
ENSDARG00000076647	-1943728043	572886739	8.44e-06	3.94e-05
ENSDARG00000077469	-1884324183	7848524563	8.5e-06	3.97e-05
ENSDARG00000087442	1797855026	6691421146	8.62e-06	4.02e-05
ENSDARG00000008542	-1759976744	6761253439	8.74e-06	4.08e-05
ENSDARG00000021110	2174316092	4753439197	8.76e-06	4.09e-05
ENSDARG00000054007	-183588163	7130109036	8.79e-06	4.09e-05
ENSDARG00000000796	2833640848	2950557269	8.94e-06	4.16e-05
ENSDARG00000087007	-1919904102	7237340455	8.97e-06	4.17e-05
ENSDARG00000013659	2402040156	4250110627	9.04e-06	4.21e-05
ENSDARG00000074781	2566260796	4171320156	9.23e-06	4.29e-05
ENSDARG00000069116	-2224316595	7430592703	9.3e-06	4.32e-05
ENSDARG00000061110	-2206390621	4541839924	9.36e-06	4.34e-05
ENSDARG00000014106	-2249332389	9650222446	9.4e-06	4.36e-05
ENSDARG00000016016	1856534794	6704129261	9.44e-06	4.38e-05
ENSDARG00000074531	1818032934	633403395	9.57e-06	4.43e-05
ENSDARG00000036658	1811324015	6591709919	9.61e-06	4.45e-05
ENSDARG00000062042	-2655125631	3272175776	9.76e-06	4.51e-05
ENSDARG00000055349	2569852772	3624940039	9.76e-06	4.51e-05
ENSDARG00000056601	2845079793	3215095972	9.79e-06	4.52e-05
ENSDARG00000007697	-1828063341	7397847731	9.84e-06	4.54e-05
ENSDARG00000015901	2008249069	7303996438	9.92e-06	4.58e-05
ENSDARG00000014259	2015615089	7575224018	9.94e-06	4.58e-05
ENSDARG00000040009	1801541407	717428847	1e-05	4.61e-05
ENSDARG00000044954	1956967711	6686909069	1.01e-05	4.65e-05
ENSDARG00000086797	-1857218339	7521462609	1.01e-05	4.65e-05
ENSDARG00000045146	1831208969	7156146718	1.02e-05	4.69e-05
ENSDARG00000028676	-1968693099	5734136895	1.02e-05	4.71e-05
ENSDARG00000041530	1826243449	636629919	1.03e-05	4.73e-05
ENSDARG00000053087	-1752365129	6768137033	1.03e-05	4.73e-05
ENSDARG00000070844	2282077278	881740088	1.05e-05	4.82e-05
ENSDARG00000068779	-236624227	3892085446	1.06e-05	4.87e-05
ENSDARG00000006760	2446282518	4302252784	1.08e-05	4.94e-05
ENSDARG00000094623	-2338775404	4050712434	1.09e-05	4.97e-05
ENSDARG00000015224	1799936325	6382827591	1.09e-05	4.97e-05
ENSDARG00000006120	-1827252819	7449105877	1.09e-05	4.98e-05
ENSDARG00000073928	3045667596	3708650239	1.09e-05	4.99e-05
ENSDARG00000087332	-1891121496	7711163257	1.09e-05	4.99e-05
ENSDARG00000094277	-1844505186	689021416	1.09e-05	4.99e-05
ENSDARG00000079029	-1840837193	6008256088	1.1e-05	5.01e-05
ENSDARG00000021225	1752121452	6681575561	1.1e-05	5.01e-05
ENSDARG00000078233	1845028355	7700967998	1.11e-05	5.03e-05
ENSDARG00000060755	1891463601	6438015443	1.11e-05	5.07e-05
ENSDARG00000076994	3114336336	2664111157	1.12e-05	5.08e-05
ENSDARG00000016858	-1965947515	6489726316	1.14e-05	5.18e-05
ENSDARG00000018334	1910831613	9863568059	1.15e-05	5.24e-05
ENSDARG00000025346	-2010023497	5152776507	1.16e-05	5.25e-05
ENSDARG00000007370	2467197743	4926404257	1.16e-05	5.28e-05
ENSDARG00000076799	1843327186	7595895141	1.16e-05	5.28e-05
ENSDARG00000004665	-1923933663	1003449047	1.18e-05	5.33e-05
ENSDARG00000005002	-1925815228	5547923473	1.18e-05	5.34e-05
ENSDARG00000009262	-1979903089	5137650151	1.19e-05	5.37e-05
ENSDARG00000069114	2849645145	401127132	1.19e-05	5.39e-05
ENSDARG00000045706	-1764917424	6981993531	1.19e-05	5.4e-05
ENSDARG00000026654	2411099907	3952316817	1.2e-05	5.41e-05
ENSDARG00000071469	1901804885	7575426128	1.21e-05	5.45e-05
ENSDARG00000053452	-1899041701	5591691015	1.21e-05	5.45e-05
ENSDARG00000015427	1902626028	967684525	1.22e-05	5.48e-05
ENSDARG00000076473	2496534223	3589135495	1.22e-05	5.49e-05
ENSDARG00000013031	1892101456	8401294519	1.24e-05	5.57e-05
ENSDARG00000012066	1786081593	6517216457	1.25e-05	5.62e-05
ENSDARG00000044357	1848571179	6553635741	1.25e-05	5.63e-05
ENSDARG00000008461	-1723308745	6698004116	1.25e-05	5.63e-05
ENSDARG00000015254	1782894319	6519290128	1.26e-05	5.68e-05
ENSDARG00000086645	-1903610324	6004786179	1.3e-05	5.83e-05
ENSDARG00000000631	1810708151	6218084852	1.32e-05	5.93e-05
ENSDARG00000004059	-2429580486	4296507198	1.34e-05	6e-05
ENSDARG00000078435	-2190331748	4816530828	1.34e-05	6e-05
ENSDARG00000058842	-1852557235	8868596806	1.35e-05	6.02e-05
ENSDARG00000063230	-1933784623	5353792913	1.36e-05	6.09e-05
ENSDARG00000055490	186643022	5666499576	1.36e-05	6.09e-05
ENSDARG00000042840	2105263759	4748526718	1.37e-05	6.11e-05
ENSDARG00000006094	2815337585	5021229718	1.38e-05	6.16e-05
ENSDARG00000094380	-2153454134	6514430753	1.38e-05	6.16e-05
ENSDARG00000059075	-1784074591	724119152	1.39e-05	6.2e-05
ENSDARG00000040440	-1833290929	9060562679	1.39e-05	6.21e-05
ENSDARG00000090714	-243288833	3612334707	1.4e-05	6.22e-05
ENSDARG00000055373	1828467087	5896403926	1.4e-05	6.22e-05
ENSDARG00000002880	2028162151	5337481683	1.41e-05	6.25e-05
ENSDARG00000092503	1993452978	5133656943	1.42e-05	6.3e-05
ENSDARG00000003961	-1960873327	513678216	1.42e-05	6.31e-05
ENSDARG00000045525	1757822685	6850563416	1.43e-05	6.34e-05
ENSDARG00000005834	1914198303	6367033806	1.44e-05	6.4e-05
ENSDARG00000037633	-1934334455	5317782292	1.45e-05	6.42e-05
ENSDARG00000013542	1831706711	6686132469	1.48e-05	6.56e-05
ENSDARG00000079438	2484825587	3892601581	1.49e-05	6.58e-05
ENSDARG00000020000	1996154596	7071360193	1.49e-05	6.61e-05
ENSDARG00000015757	1777035355	6693499004	1.5e-05	6.63e-05
ENSDARG00000079816	-227753124	4008355301	1.5e-05	6.64e-05
ENSDARG00000091092	1964079726	67717354	1.5e-05	6.64e-05
ENSDARG00000059699	-2429782291	3354814046	1.52e-05	6.7e-05
ENSDARG00000036293	-2368624273	3806115207	1.52e-05	6.71e-05
ENSDARG00000055885	-1827562906	8328193048	1.53e-05	6.76e-05
ENSDARG00000087823	-1783081636	6142180533	1.53e-05	6.76e-05
ENSDARG00000035559	1820658683	7740789121	1.54e-05	6.8e-05
ENSDARG00000091656	-177407068	6821247636	1.54e-05	6.8e-05
ENSDARG00000013250	1796738058	7376218446	1.55e-05	6.84e-05
ENSDARG00000079271	2580702032	484127976	1.57e-05	6.89e-05
ENSDARG00000056228	2072667401	4848338457	1.57e-05	6.92e-05
ENSDARG00000042341	-189604767	5551625316	1.58e-05	6.93e-05
ENSDARG00000012790	1968228213	7957336281	1.6e-05	7.04e-05
ENSDARG00000056961	2002054606	5105581654	1.61e-05	7.07e-05
ENSDARG00000044565	1845411663	7888878847	1.62e-05	7.09e-05
ENSDARG00000037203	-1961082841	5387322272	1.64e-05	7.17e-05
ENSDARG00000037897	1866218469	759352438	1.64e-05	7.17e-05
ENSDARG00000009837	1945012081	5421734038	1.68e-05	7.35e-05
ENSDARG00000020527	-1824521012	839801379	1.68e-05	7.35e-05
ENSDARG00000076559	-1832341594	7525714933	1.71e-05	7.46e-05
ENSDARG00000040926	200362294	9272420657	1.71e-05	7.47e-05
ENSDARG00000087752	-173182562	6252308878	1.73e-05	7.54e-05
ENSDARG00000093235	2458817765	5408321548	1.74e-05	7.6e-05
ENSDARG00000003829	1825672395	6455783844	1.75e-05	7.62e-05
ENSDARG00000051785	-1919065637	5984935821	1.75e-05	7.62e-05
ENSDARG00000004696	-181721991	5778126119	1.79e-05	7.81e-05
ENSDARG00000041011	-2053015147	4849358328	1.81e-05	7.88e-05
ENSDARG00000004889	-2000821518	5875215327	1.81e-05	7.89e-05
ENSDARG00000007362	1755411944	6189912551	1.82e-05	7.89e-05
ENSDARG00000003403	2352827185	3739737981	1.84e-05	7.97e-05
ENSDARG00000071211	-1904042564	5244945721	1.85e-05	8.02e-05
ENSDARG00000055999	-2671855346	3820343976	1.85e-05	8.03e-05
ENSDARG00000077114	2878429137	5294108811	1.86e-05	8.05e-05
ENSDARG00000062460	2542096257	3168557606	1.87e-05	8.1e-05
ENSDARG00000036155	-2291879753	4021833884	1.88e-05	8.12e-05
ENSDARG00000077737	2043085042	490505459	1.9e-05	8.2e-05
ENSDARG00000027017	-2602218417	3585868187	1.91e-05	8.27e-05
ENSDARG00000034042	2602120769	311808694	1.91e-05	8.27e-05
ENSDARG00000000442	1740978775	634779974	1.92e-05	8.27e-05
ENSDARG00000001807	2336719992	3836296796	1.92e-05	8.28e-05
ENSDARG00000061168	-1916551292	5955161627	1.97e-05	8.49e-05
ENSDARG00000009131	2659384326	2794506157	2.01e-05	8.65e-05
ENSDARG00000079613	-1878585822	5724230432	2.01e-05	8.65e-05
ENSDARG00000040930	2556204529	2964013317	2.03e-05	8.73e-05
ENSDARG00000042615	-1715224377	6845933912	2.04e-05	8.78e-05
ENSDARG00000074057	2119091533	1050137917	2.04e-05	8.78e-05
ENSDARG00000009939	2137460025	4487134111	2.06e-05	8.86e-05
ENSDARG00000016782	185181361	9406715708	2.08e-05	8.94e-05
ENSDARG00000090190	1805709966	8688534427	2.1e-05	9.04e-05
ENSDARG00000005397	-1747179628	650326946	2.11e-05	9.04e-05
ENSDARG00000002385	-1706049091	6746714426	2.11e-05	9.04e-05
ENSDARG00000001676	1889808307	8072845491	2.12e-05	9.07e-05
ENSDARG00000023316	276559035	2383795084	2.14e-05	9.16e-05
ENSDARG00000062770	-2363152101	3799542838	2.16e-05	9.24e-05
ENSDARG00000087759	1834458903	7650995733	2.17e-05	9.27e-05
ENSDARG00000046013	2220753029	5990277843	2.18e-05	9.34e-05
ENSDARG00000013095	1877462888	5773893897	2.2e-05	9.38e-05
ENSDARG00000056713	-1699762716	6897152851	2.21e-05	9.45e-05
ENSDARG00000017423	1697790696	6912262561	2.21e-05	9.45e-05
ENSDARG00000074695	2000257439	5067155984	2.26e-05	9.62e-05
ENSDARG00000073688	1736950044	7275638336	2.3e-05	9.79e-05
ENSDARG00000001729	1811012503	779697967	2.3e-05	9.8e-05
ENSDARG00000020232	-1811793845	822394073	2.31e-05	9.82e-05
ENSDARG00000074611	1895683226	5483393861	2.31e-05	9.83e-05
ENSDARG00000012330	-2140228232	4696778779	2.33e-05	9.92e-05
ENSDARG00000063362	-1793117458	6084468958	2.35e-05	9.99e-05
ENSDARG00000056720	2143566886	524837397	2.36e-05	0.000100279
ENSDARG00000021389	1723864664	7179231017	2.42e-05	0.000102592
ENSDARG00000009113	-1927546575	5168529514	2.42e-05	0.000102648
ENSDARG00000018653	2572308112	2972423477	2.43e-05	0.000102894
ENSDARG00000058943	-2138674338	4706186803	2.45e-05	0.000103814
ENSDARG00000035853	-1808429554	5683751801	2.46e-05	0.000104291
ENSDARG00000032010	2225430668	4658259325	2.51e-05	0.000106425
ENSDARG00000071032	-2182390921	427021697	2.56e-05	0.000108402
ENSDARG00000062315	1945758087	5597741811	2.57e-05	0.000108437
ENSDARG00000076659	1745190051	6921051942	2.57e-05	0.000108437
ENSDARG00000021664	1785395519	8228763	2.58e-05	0.000108949
ENSDARG00000062765	1760478681	751313515	2.58e-05	0.000108949
ENSDARG00000077485	1652062644	6738739654	2.6e-05	0.000109765
ENSDARG00000059498	2312815756	3676172263	2.62e-05	0.000110221
ENSDARG00000058292	1895092299	8328351693	2.62e-05	0.000110509
ENSDARG00000078135	-2112277489	6709173883	2.66e-05	0.000111988
ENSDARG00000003546	-1806054692	6078216166	2.67e-05	0.000112377
ENSDARG00000070805	177620237	5778276898	2.68e-05	0.000112781
ENSDARG00000024365	2310017354	3875426159	2.7e-05	0.000113394
ENSDARG00000016086	1887063596	5588271756	2.71e-05	0.000113751
ENSDARG00000042732	-1770927597	8209695594	2.72e-05	0.000114134
ENSDARG00000061378	-170308838	6515925983	2.73e-05	0.000114519
ENSDARG00000014333	1936888448	5485197019	2.73e-05	0.000114584
ENSDARG00000070433	-171565616	7131303558	2.75e-05	0.000115278
ENSDARG00000006394	-180622113	6005976299	2.77e-05	0.000115841
ENSDARG00000011931	1867733723	5507633408	2.78e-05	0.000116276
ENSDARG00000075165	-1740564836	5850482986	2.8e-05	0.000116957
ENSDARG00000071585	-2595172277	2935421179	2.85e-05	0.000119309
ENSDARG00000007711	-2086680394	483053013	2.9e-05	0.000121035
ENSDARG00000070688	1787711081	7772448102	2.9e-05	0.000121159
ENSDARG00000035563	1915109783	7420784136	2.92e-05	0.000121932
ENSDARG00000061844	1900111119	519168397	2.93e-05	0.000122197
ENSDARG00000021324	-1948303921	4966015784	2.97e-05	0.000123871
ENSDARG00000061928	-2025031765	7889146426	3.02e-05	0.000125814
ENSDARG00000008931	-2426539465	6669225395	3.03e-05	0.000125963
ENSDARG00000016717	-1709255615	7049956193	3.03e-05	0.000126166
ENSDARG00000006010	1793450446	6116875362	3.05e-05	0.000126714
ENSDARG00000035577	1785293705	5933821037	3.06e-05	0.000127201
ENSDARG00000004891	1779044449	5781642771	3.06e-05	0.000127277
ENSDARG00000004527	-1711018111	6584228754	3.14e-05	0.000130258
ENSDARG00000019096	212039815	4332294086	3.19e-05	0.000132222
ENSDARG00000043180	2208361197	5429423135	3.22e-05	0.000133568
ENSDARG00000062561	-2063969767	4343328329	3.23e-05	0.000133706
ENSDARG00000018618	1784368282	8073692351	3.23e-05	0.000133792
ENSDARG00000016074	-2015229597	5377850829	3.25e-05	0.000134368
ENSDARG00000007923	174016784	699100809	3.25e-05	0.000134368
ENSDARG00000057987	1917111679	5119528907	3.26e-05	0.000134841
ENSDARG00000020781	-1750803742	7654732021	3.27e-05	0.00013516
ENSDARG00000008735	-1727975482	7627078825	3.28e-05	0.000135621
ENSDARG00000041869	-178211666	7591419088	3.29e-05	0.000135631
ENSDARG00000069932	1864125285	5969722044	3.3e-05	0.000135932
ENSDARG00000003269	1702498436	72731986	3.3e-05	0.000135986
ENSDARG00000002933	2112642259	4578280178	3.3e-05	0.000136115
ENSDARG00000077523	-233054476	3411858555	3.36e-05	0.000138345
ENSDARG00000030598	1722163759	6091453295	3.38e-05	0.000139017
ENSDARG00000071196	1755387667	8158210843	3.43e-05	0.00014097
ENSDARG00000059888	-1934585698	5661022149	3.44e-05	0.000141208
ENSDARG00000003749	1854593859	5383101016	3.44e-05	0.000141446
ENSDARG00000012482	2655700125	2866217768	3.5e-05	0.000143815
ENSDARG00000068833	1927402502	5515392389	3.63e-05	0.000148838
ENSDARG00000059020	-2026000185	4560355359	3.64e-05	0.000149052
ENSDARG00000086618	1894741992	6909192522	3.64e-05	0.000149307
ENSDARG00000045814	2006429473	4905547656	3.65e-05	0.000149662
ENSDARG00000038858	-1711867064	6531036022	3.68e-05	0.00015066
ENSDARG00000051921	-1656095856	6961358624	3.68e-05	0.00015066
ENSDARG00000054749	1886387248	5188171265	3.69e-05	0.000150987
ENSDARG00000019728	1820292038	7793345559	3.71e-05	0.000151469
ENSDARG00000075570	1704245548	7310579031	3.78e-05	0.000154555
ENSDARG00000039216	-1662322516	692323005	3.8e-05	0.000155251
ENSDARG00000071674	-1771722831	7222844576	3.81e-05	0.000155448
ENSDARG00000006624	1697262044	6915500632	3.81e-05	0.000155452
ENSDARG00000078083	-1831007918	5477039304	3.84e-05	0.000156265
ENSDARG00000038186	-2083855675	422690378	3.84e-05	0.000156529
ENSDARG00000041951	-1622340026	6683724387	3.88e-05	0.000157926
ENSDARG00000040779	-1671811506	7102869264	3.89e-05	0.000158172
ENSDARG00000017211	1723333074	7114964667	3.91e-05	0.000158839
ENSDARG00000015686	-1947045263	5069134995	3.95e-05	0.000160381
ENSDARG00000043705	-2241084791	3661890857	3.96e-05	0.000160782
ENSDARG00000037154	2387971872	326523781	4e-05	0.000162402
ENSDARG00000058824	-1668904059	6530866318	4.04e-05	0.000163977
ENSDARG00000009218	-1857108168	5129257933	4.06e-05	0.000164513
ENSDARG00000079857	-216207855	3863693642	4.08e-05	0.000165347
ENSDARG00000068830	-1955097962	476718109	4.09e-05	0.000165556
ENSDARG00000012403	2040086104	4449743379	4.1e-05	0.000165802
ENSDARG00000088888	1724761307	6068756146	4.1e-05	0.000165868
ENSDARG00000016153	1740173306	9227804355	4.11e-05	0.000165978
ENSDARG00000003399	202666395	4906402666	4.21e-05	0.00016988
ENSDARG00000070338	-174203526	5883564027	4.21e-05	0.000169893
ENSDARG00000060197	2052248432	4558381711	4.22e-05	0.000170275
ENSDARG00000077222	-2460064706	2745550571	4.28e-05	0.000172498
ENSDARG00000076781	1729461409	6054824309	4.28e-05	0.000172652
ENSDARG00000011170	2765088366	351233402	4.29e-05	0.000172879
ENSDARG00000010411	1836047839	7344788561	4.31e-05	0.000173443
ENSDARG00000092003	-2753401808	3894681817	4.33e-05	0.000174098
ENSDARG00000069673	-2168945743	4353058361	4.36e-05	0.000175253
ENSDARG00000089464	1639470398	6677474689	4.39e-05	0.000176338
ENSDARG00000018397	2159375593	5156869728	4.4e-05	0.000176876
ENSDARG00000055899	2158256884	4104161291	4.44e-05	0.0001781
ENSDARG00000074740	-19154293	4918897055	4.45e-05	0.000178436
ENSDARG00000060150	1668529919	6893093124	4.45e-05	0.000178436
ENSDARG00000060106	1826932873	6258856702	4.47e-05	0.000179166
ENSDARG00000036915	2025849574	4469027317	4.52e-05	0.000180881
ENSDARG00000003206	-1969104723	459634995	4.54e-05	0.000181613
ENSDARG00000018743	-1726824098	5693322335	4.57e-05	0.000182834
ENSDARG00000054302	-232304485	3296310628	4.58e-05	0.000182983
ENSDARG00000086905	-2690895224	4289008209	4.58e-05	0.000182983
ENSDARG00000019033	-1604716216	6693289703	4.62e-05	0.000184504
ENSDARG00000057011	2147217452	4223862252	4.65e-05	0.00018544
ENSDARG00000095577	-1915786998	4754762031	4.68e-05	0.000186661
ENSDARG00000075677	-1647962764	6532075925	4.68e-05	0.000186726
ENSDARG00000000568	1760939889	588087158	4.72e-05	0.000187936
ENSDARG00000059752	2067647432	7821322888	4.79e-05	0.000190694
ENSDARG00000008155	1698952897	6306183318	4.82e-05	0.000191916
ENSDARG00000057481	-2208308227	3821808278	4.84e-05	0.000192561
ENSDARG00000021046	-2081707317	4167600769	4.85e-05	0.000192684
ENSDARG00000009252	-210365705	4183304872	4.85e-05	0.000192776
ENSDARG00000008540	-1825870184	7262380268	4.86e-05	0.000192877
ENSDARG00000056023	1821857749	737557771	4.94e-05	0.000196114
ENSDARG00000091150	1757004761	1015179018	5e-05	0.000198576
ENSDARG00000088560	-1677095654	5954611059	5.06e-05	0.000200628
ENSDARG00000068176	-171614234	7273598694	5.12e-05	0.000202745
ENSDARG00000007708	-1786823828	9237313784	5.15e-05	0.000204055
ENSDARG00000036573	1700242749	5938096234	5.16e-05	0.0002041
ENSDARG00000007222	-1644804173	6876629392	5.16e-05	0.000204316
ENSDARG00000060907	-2198498248	394222765	5.19e-05	0.000205131
ENSDARG00000077810	2558588647	4009737758	5.21e-05	0.000205869
ENSDARG00000079382	-1765275061	5557350553	5.21e-05	0.000205974
ENSDARG00000001578	-1651861701	7110190073	5.23e-05	0.00020637
ENSDARG00000056101	2575687974	2729527859	5.23e-05	0.000206445
ENSDARG00000070538	1628401135	6616776733	5.32e-05	0.000209842
ENSDARG00000041875	-1723261614	8695479038	5.35e-05	0.000210761
ENSDARG00000009685	-1832530288	5095278265	5.36e-05	0.000211113
ENSDARG00000077549	1877676366	5260499182	5.39e-05	0.000212083
ENSDARG00000023584	-1630532344	6451187148	5.41e-05	0.000212863
ENSDARG00000071152	1779024697	5523684846	5.43e-05	0.000213432
ENSDARG00000035360	-180742231	6175821069	5.44e-05	0.000213766
ENSDARG00000076414	2358280302	3275991447	5.45e-05	0.000214046
ENSDARG00000074444	-2130057969	4348767037	5.48e-05	0.000215115
ENSDARG00000023903	-2344435081	2665868266	5.49e-05	0.000215316
ENSDARG00000089369	2353716959	6633921784	5.54e-05	0.000217418
ENSDARG00000031657	-1872466288	4917927958	5.55e-05	0.000217418
ENSDARG00000052114	-2065142318	4602789399	5.56e-05	0.000217716
ENSDARG00000003940	1814336463	7361006611	5.56e-05	0.000217716
ENSDARG00000007081	1778003538	7686697795	5.58e-05	0.000218459
ENSDARG00000059572	-2283278681	4442356032	5.67e-05	0.000221823
ENSDARG00000041203	1705735222	7654037348	5.69e-05	0.000222103
ENSDARG00000075340	-1693065957	8317625059	5.68e-05	0.000222103
ENSDARG00000076120	1642932788	6923241224	5.71e-05	0.000222938
ENSDARG00000076003	-1741677969	7075853688	5.75e-05	0.000224267
ENSDARG00000060707	-2330705488	33352235	5.82e-05	0.000226831
ENSDARG00000089213	1813501274	6209684131	5.82e-05	0.000227032
ENSDARG00000033551	215514746	4059355321	5.85e-05	0.000227781
ENSDARG00000074735	-1737723943	6136839958	5.88e-05	0.000228947
ENSDARG00000058449	1614971341	6937788867	5.9e-05	0.000229504
ENSDARG00000009493	-2035780655	471117494	5.91e-05	0.000229734
ENSDARG00000005993	-1622194031	7194108435	5.99e-05	0.000233002
ENSDARG00000060306	1712882191	6345855159	6.02e-05	0.000233901
ENSDARG00000086670	-1760180725	5532240142	6.06e-05	0.000235258
ENSDARG00000035005	-1991850728	504756967	6.07e-05	0.000235717
ENSDARG00000074413	1695946479	5887912482	6.12e-05	0.000237213
ENSDARG00000019223	1834847354	8727300011	6.14e-05	0.000238197
ENSDARG00000002564	-1965846488	4443253945	6.22e-05	0.000241193
ENSDARG00000069954	2194241531	3775200913	6.25e-05	0.000242076
ENSDARG00000044074	1614693365	6331145904	6.26e-05	0.000242178
ENSDARG00000060645	1845921172	5887300585	6.27e-05	0.000242501
ENSDARG00000094176	-2380301274	267502676	6.36e-05	0.000245911
ENSDARG00000008765	-1638071931	6654838645	6.37e-05	0.000246073
ENSDARG00000038574	2537572046	2550301687	6.42e-05	0.000247811
ENSDARG00000077009	2009914689	516007571	6.42e-05	0.000247811
ENSDARG00000038615	1980893179	5460345252	6.49e-05	0.000250351
ENSDARG00000044418	-2172421653	417081353	6.49e-05	0.000250385
ENSDARG00000011975	-2562578987	2932931861	6.51e-05	0.000251047
ENSDARG00000012336	1826389809	5649189013	6.54e-05	0.000251954
ENSDARG00000075783	-2180279095	3502331337	6.65e-05	0.000256127
ENSDARG00000018825	-1826249054	5237069926	6.66e-05	0.000256259
ENSDARG00000007959	1643897673	6703066871	6.67e-05	0.000256321
ENSDARG00000087451	-2892050394	3802447203	6.72e-05	0.000258384
ENSDARG00000060841	1640859584	6450826057	6.74e-05	0.000259023
ENSDARG00000077301	2242476432	3760213157	6.76e-05	0.000259455
ENSDARG00000016855	-1665860371	7746880321	6.81e-05	0.000261375
ENSDARG00000078767	1620487466	6666695183	6.95e-05	0.000266613
ENSDARG00000018491	-1683901097	7863338915	6.97e-05	0.000267087
ENSDARG00000090764	220078558	3924278836	6.97e-05	0.000267206
ENSDARG00000034503	-1664763757	5795560584	7e-05	0.000267911
ENSDARG00000003811	1619683141	7077852768	7.01e-05	0.000268409
ENSDARG00000061895	-1837781163	5431206745	7.07e-05	0.00027044
ENSDARG00000002264	-1648274629	5930695919	7.08e-05	0.00027061
ENSDARG00000078338	-1772540385	6468029804	7.15e-05	0.000273087
ENSDARG00000057435	-2072515002	3930263538	7.16e-05	0.000273521
ENSDARG00000074641	1797872073	7955911752	7.17e-05	0.000273521
ENSDARG00000088332	1870935792	4844200654	7.23e-05	0.000275611
ENSDARG00000069922	1896860098	5540733328	7.25e-05	0.000276398
ENSDARG00000012051	-2025378459	4150214939	7.37e-05	0.000280933
ENSDARG00000020890	1757843643	5499006718	7.38e-05	0.000281071
ENSDARG00000069042	1685526717	574190252	7.39e-05	0.000281258
ENSDARG00000023921	-1792543705	9020287457	7.4e-05	0.000281679
ENSDARG00000006666	-1591499977	6321048296	7.47e-05	0.000284123
ENSDARG00000045249	-1782601883	6134644707	7.56e-05	0.000287138
ENSDARG00000078751	1843547583	754338917	7.57e-05	0.000287385
ENSDARG00000024933	1971422193	4431113795	7.57e-05	0.000287502
ENSDARG00000007347	-1699042084	8130667365	7.7e-05	0.000292228
ENSDARG00000074169	1773254441	5185665757	7.72e-05	0.000292736
ENSDARG00000009447	1671364065	8770968785	7.76e-05	0.000294018
ENSDARG00000069742	1633588151	6095935756	7.77e-05	0.000294309
ENSDARG00000055900	1707762832	8156460514	7.77e-05	0.000294351
ENSDARG00000026166	1676370247	5795351442	7.81e-05	0.000295497
ENSDARG00000038106	2175723965	5071071897	7.97e-05	0.000301244
ENSDARG00000070437	174136505	8692960288	7.97e-05	0.000301244
ENSDARG00000078111	-183412946	4789013776	7.97e-05	0.000301247
ENSDARG00000038308	1766419614	5244239878	7.98e-05	0.000301247
ENSDARG00000062000	1980027875	4369303174	7.99e-05	0.000301448
ENSDARG00000074577	-2212964295	3815980212	8e-05	0.000301629
ENSDARG00000006038	1696870932	6105350614	8e-05	0.000301695
ENSDARG00000070589	-1606216107	6179874011	8.07e-05	0.000303915
ENSDARG00000038865	-2285833743	304305382	8.08e-05	0.000304157
ENSDARG00000067981	-1936692396	5632697723	8.18e-05	0.000307732
ENSDARG00000075422	-1726753182	5685995326	8.2e-05	0.000308425
ENSDARG00000033589	-1936967391	6711131321	8.27e-05	0.000310826
ENSDARG00000007663	2194370718	3886311051	8.31e-05	0.000312432
ENSDARG00000037883	-1707980486	5649306009	8.43e-05	0.000316475
ENSDARG00000014098	-1733822466	5859471675	8.43e-05	0.000316539
ENSDARG00000027143	-158677923	6251746421	8.47e-05	0.00031768
ENSDARG00000062195	-2283053039	3875429725	8.53e-05	0.000320059
ENSDARG00000003308	1554905142	6776895462	8.61e-05	0.000322737
ENSDARG00000053444	1680605555	6506545875	8.63e-05	0.000323438
ENSDARG00000045790	-1885026706	7009739465	8.66e-05	0.000324223
ENSDARG00000076836	1574708329	6950392437	8.67e-05	0.000324629
ENSDARG00000013222	-1735081777	5375493247	8.77e-05	0.000327982
ENSDARG00000040309	-1908025198	5132448626	8.8e-05	0.000328977
ENSDARG00000010462	1977296897	5472554802	8.82e-05	0.000329663
ENSDARG00000034001	-1582773846	6348562138	8.84e-05	0.000330281
ENSDARG00000059636	-2182494532	3317029436	8.9e-05	0.000332144
ENSDARG00000033140	2394408991	2769487741	8.93e-05	0.000332998
ENSDARG00000043170	1879620961	621635873	9e-05	0.000335483
ENSDARG00000029452	2262957876	3285154535	9.02e-05	0.000336269
ENSDARG00000062235	3041189659	3694479434	9.04e-05	0.000336644
ENSDARG00000012002	1660399073	6125749652	9.06e-05	0.000337403
ENSDARG00000027803	-1602425089	6490083187	9.09e-05	0.000338315
ENSDARG00000018846	1786658201	7268808738	9.14e-05	0.000339957
ENSDARG00000044692	-1526468508	6716811897	9.24e-05	0.000343553
ENSDARG00000037038	1611174024	7508076022	9.27e-05	0.000344331
ENSDARG00000009449	-1595913068	7130086658	9.27e-05	0.000344362
ENSDARG00000089321	-1570107669	6925231255	9.34e-05	0.000346721
ENSDARG00000022309	1681458329	8411525618	9.44e-05	0.000350021
ENSDARG00000059811	-199190793	4498270191	9.66e-05	0.000358238
ENSDARG00000042697	-1622901546	6067251042	9.71e-05	0.000359655
ENSDARG00000062973	1783357384	5051100004	9.73e-05	0.000360426
ENSDARG00000067916	-1759964108	5079446396	9.8e-05	0.000362906
ENSDARG00000058323	-198040759	5786478183	9.89e-05	0.000365964
ENSDARG00000040644	-1613598863	586769053	0.000100293	0.000370849
ENSDARG00000018658	-1524692808	6748688898	0.000100884	0.00037284
ENSDARG00000058548	2105112011	3999262811	0.000101161	0.000373672
ENSDARG00000006911	1922664409	4507043442	0.000101754	0.000375599
ENSDARG00000027046	-1598929512	6153142256	0.000101788	0.000375599
ENSDARG00000045827	2335254163	3955811163	0.000102195	0.000376903
ENSDARG00000074042	-2325473006	446490075	0.000102597	0.000378191
ENSDARG00000074236	-1590411687	6245755733	0.000102681	0.000378304
ENSDARG00000076779	1600287837	6594296233	0.000102824	0.000378634
ENSDARG00000071031	1600457523	7065386294	0.000103126	0.00037955
ENSDARG00000015890	1894945684	4999490792	0.000103394	0.000380341
ENSDARG00000008593	-1686010225	6186747887	0.000103537	0.00038067
ENSDARG00000071040	-1914477705	5482593743	0.00010554	0.000387833
ENSDARG00000032234	-2060134575	3856748143	0.000105766	0.000388465
ENSDARG00000077057	1819961842	4890100156	0.000106177	0.000389773
ENSDARG00000003017	1658867435	6234566157	0.000106546	0.000390723
ENSDARG00000014582	1619381348	5908957456	0.000106514	0.000390723
ENSDARG00000012553	1651979884	7383278326	0.000106729	0.000391003
ENSDARG00000015889	1602550465	7410645728	0.000106732	0.000391003
ENSDARG00000053457	1749911766	951570192	0.000107901	0.000395084
ENSDARG00000036041	1920454729	539218168	0.000108011	0.00039528
ENSDARG00000017321	2707337545	3806983052	0.000108689	0.000397557
ENSDARG00000070171	1876782079	4851648716	0.000109339	0.00039973
ENSDARG00000017047	-2210312577	4966963001	0.000109457	0.000399957
ENSDARG00000042428	2297929791	3224253578	0.000110956	0.000405227
ENSDARG00000002071	2365042644	4137176594	0.000112814	0.000411589
ENSDARG00000062123	1581015088	6373644643	0.0001128	0.000411589
ENSDARG00000026835	-1854891014	5069215777	0.000113017	0.000412043
ENSDARG00000059701	1844357442	5740931921	0.000113112	0.000412043
ENSDARG00000013776	-1643554136	8147494006	0.000113076	0.000412043
ENSDARG00000043601	-1643017928	8810588254	0.000113234	0.000412276
ENSDARG00000029088	-1606984076	5706260724	0.00011372	0.000413621
ENSDARG00000002702	-1527011109	6802100218	0.000113684	0.000413621
ENSDARG00000007421	2797732807	3575508066	0.00011398	0.000414357
ENSDARG00000059801	1603321333	6398947854	0.000115038	0.000417988
ENSDARG00000020204	-2042531088	4389681334	0.000115911	0.000420947
ENSDARG00000037857	2137035698	3527059172	0.00011652	0.000422943
ENSDARG00000077979	2042205885	4009435052	0.000117208	0.000425223
ENSDARG00000011175	1551236495	6594719199	0.000117478	0.000425984
ENSDARG00000010085	1765766505	5175057326	0.00011755	0.000426028
ENSDARG00000063051	1801662958	5025092011	0.000117688	0.000426312
ENSDARG00000063419	1672669392	5696283587	0.000118135	0.000427713
ENSDARG00000074597	1669781707	7957051847	0.000118435	0.000428581
ENSDARG00000060981	-179207016	5120228726	0.000119081	0.0004307
ENSDARG00000069671	1727648832	545360946	0.000119287	0.000431009
ENSDARG00000052330	1672661263	5764894867	0.000119234	0.000431009
ENSDARG00000089419	-1589126444	6085731559	0.000119573	0.00043182
ENSDARG00000035750	1761124692	1005870431	0.000120241	0.000434012
ENSDARG00000031678	1640028406	8068616331	0.000120475	0.00043464
ENSDARG00000062109	-1580900956	6564464828	0.000120753	0.000435421
ENSDARG00000045543	-1550384144	6565756103	0.000120924	0.000435816
ENSDARG00000044753	-1598804071	7536809557	0.000121271	0.000436847
ENSDARG00000046061	-169398493	6369381458	0.000122597	0.00044129
ENSDARG00000088439	-1652037961	7006148638	0.000122629	0.00044129
ENSDARG00000068264	-2023024184	4121964075	0.00012271	0.000441359
ENSDARG00000078953	-1544903932	6390421277	0.000123033	0.000442299
ENSDARG00000017046	-1703043105	7663796486	0.000123455	0.00044359
ENSDARG00000089340	-2184399984	3257980426	0.000123886	0.000444916
ENSDARG00000004687	-1882983214	4909258464	0.000124102	0.000445466
ENSDARG00000057272	1731576089	5204266549	0.000124624	0.000447112
ENSDARG00000060649	-1684437692	7794059646	0.000124991	0.000448203
ENSDARG00000063190	-1635904189	5624654589	0.000125506	0.000449598
ENSDARG00000060868	1574959361	6854039269	0.000125453	0.000449598
ENSDARG00000052290	2090544764	4037421176	0.000125645	0.000449795
ENSDARG00000076821	1852755054	5696449593	0.000125736	0.000449795
ENSDARG00000027501	1831035544	5140558112	0.00012575	0.000449795
ENSDARG00000080006	1729348949	5159959683	0.0001259	0.000450103
ENSDARG00000055043	-2115828088	3488964107	0.000126243	0.000451104
ENSDARG00000028517	-1895848823	4584041658	0.000126419	0.000451506
ENSDARG00000060182	-2128478023	316554978	0.000126914	0.000453047
ENSDARG00000056334	-1703824982	5459386582	0.000127271	0.000454094
ENSDARG00000021366	-165804382	6157912985	0.000128187	0.000457131
ENSDARG00000057414	-1617945567	9306233674	0.000128675	0.000458643
ENSDARG00000013892	1904493345	4799838925	0.000128893	0.000458961
[truncated: 5,120 more rows]

## Sheet: Tissues
Genes expressed in tissues according Zfin database
Digestive (n=92)		Epidermis (n=28)		Eye (n=62)		Hemocardio (n=50)		Muscle (n=100)		Nervous System (n=169)		Ear (n=40)		Heart (n=100)		Liver (n=25)		Pigmentation (n=26)		Vasculature (n=100)
ENSDARG00000001578	echs1	ENSDARG00000004261	tmed9	ENSDARG00000002613	rpa3	ENSDARG00000002128	cwf19l1	ENSDARG00000000551	slc1a4	ENSDARG00000000503	stx1b	ENSDARG00000001721	oc90	ENSDARG00000002216	tbx3	ENSDARG00000003200	foxm1	ENSDARG00000003446	ippk	ENSDARG00000000568	ell
ENSDARG00000002830	trmt2a	ENSDARG00000005762	col14a1	ENSDARG00000003235	nup88	ENSDARG00000003462	fech	ENSDARG00000001057	bysl	ENSDARG00000001785	irx2a	ENSDARG00000002952	smo	ENSDARG00000002952	smo	ENSDARG00000007982	onecut1	ENSDARG00000003845	chm	ENSDARG00000001807	tnfrsf21
ENSDARG00000003383	asb8	ENSDARG00000012066	dcn	ENSDARG00000003584	pla2g7	ENSDARG00000004251	dhfr	ENSDARG00000004060	bhlhe40	ENSDARG00000001994	stxbp1a	ENSDARG00000003293	sox9a	ENSDARG00000003399	fgf8a	ENSDARG00000008735	atp6ap2	ENSDARG00000007654	nsfa	ENSDARG00000002952	smo
ENSDARG00000004161	ik	ENSDARG00000012405	col1a1a	ENSDARG00000007628	dusp1	ENSDARG00000004979	elovl5	ENSDARG00000004171	rabac1	ENSDARG00000002215	rtca	ENSDARG00000003399	fgf8a	ENSDARG00000003938	rpa1	ENSDARG00000010655	ppm1k	ENSDARG00000009170	ctr9	ENSDARG00000003200	foxm1
ENSDARG00000004296	ambpl	ENSDARG00000015947	matn4	ENSDARG00000008560	brap	ENSDARG00000006818	urod	ENSDARG00000004714	tcf12	ENSDARG00000002564	syngr1a	ENSDARG00000003570	hsp90b1	ENSDARG00000004246	slit2	ENSDARG00000014571	ctnnb1	ENSDARG00000015427	hdac1	ENSDARG00000003546	unc45a
ENSDARG00000004687	acaa1	ENSDARG00000017105	vasp	ENSDARG00000013505	ube2kb	ENSDARG00000008503	glcci1	ENSDARG00000004964	cyp4t8	ENSDARG00000004017	spag1	ENSDARG00000003845	chm	ENSDARG00000004251	dhfr	ENSDARG00000014986	acvr1l	ENSDARG00000015540	psen2	ENSDARG00000003811	plxnb2a
ENSDARG00000004806	grwd1	ENSDARG00000017676	mmp2	ENSDARG00000015352	lsg1	ENSDARG00000008867	rap1b	ENSDARG00000005162	tpm3	ENSDARG00000004861	esrrga	ENSDARG00000006524	supt6h	ENSDARG00000005150	tbx20	ENSDARG00000015427	hdac1	ENSDARG00000016139	mkks	ENSDARG00000004372	fmnl3
ENSDARG00000004909	cat	ENSDARG00000019353	sparc	ENSDARG00000015676	nmd3	ENSDARG00000009315	clgn	ENSDARG00000005191	ahcy	ENSDARG00000005150	tbx20	ENSDARG00000007641	msxe	ENSDARG00000006120	tbx2b	ENSDARG00000017821	gata5	ENSDARG00000029179	foxd1	ENSDARG00000005150	tbx20
ENSDARG00000005479	odz3	ENSDARG00000019845	pdlim1	ENSDARG00000016477	eif4a2	ENSDARG00000010721	Sept6_	ENSDARG00000006397	laptm4a	ENSDARG00000005185	cpn1	ENSDARG00000009510	irx1a	ENSDARG00000006524	supt6h	ENSDARG00000019995	bmp4	ENSDARG00000031894	lef1	ENSDARG00000008186	syk
ENSDARG00000005842	cd9a	ENSDARG00000020007	col1a2	ENSDARG00000016710	rchy1	ENSDARG00000019521	mpx	ENSDARG00000006757	kbtbd10b	ENSDARG00000005470	kif5aa	ENSDARG00000009534	wls	ENSDARG00000008305	hand2	ENSDARG00000021389	jag2	ENSDARG00000033539	paics	ENSDARG00000008237	sars
ENSDARG00000007421	ftcd	ENSDARG00000020136	ptges	ENSDARG00000018165	depdc1a	ENSDARG00000019707	C21H9orf114	ENSDARG00000007277	myf5	ENSDARG00000005574	vsx2	ENSDARG00000010640	SLC12A2 (6 of 6)	ENSDARG00000008398	cacna1c	ENSDARG00000030756	dnmt1	ENSDARG00000036338	vps11	ENSDARG00000008384	hdac6
ENSDARG00000007549	pdxdc1	ENSDARG00000023062	cyr61	ENSDARG00000018508	zdhhc8b	ENSDARG00000020785	lama4	ENSDARG00000007517	homer1b	ENSDARG00000005645	robo3	ENSDARG00000012081	kif3b	ENSDARG00000008433	unc45b	ENSDARG00000032234	wnt2bb	ENSDARG00000039827	bbs5	ENSDARG00000010771	gipc1
ENSDARG00000007641	msxe	ENSDARG00000035563	znf703	ENSDARG00000018973	clptm1	ENSDARG00000024654	pgm3	ENSDARG00000008107	src	ENSDARG00000005872	arhgap28	ENSDARG00000012684	atp2b1a	ENSDARG00000009170	ctr9	ENSDARG00000035831	gata6	ENSDARG00000041450	rab11a	ENSDARG00000012025	hs6st2
ENSDARG00000008490	ltv1	ENSDARG00000036279	lamc1	ENSDARG00000019907	dscc1	ENSDARG00000026655	tspo	ENSDARG00000008487	dmd	ENSDARG00000006370	atp6v1h	ENSDARG00000014259	eya1	ENSDARG00000009418	mef2cb	ENSDARG00000036338	vps11	ENSDARG00000041621	bbs2	ENSDARG00000013705	ccm2
ENSDARG00000008904	smarca2	ENSDARG00000037361	kdelr2b	ENSDARG00000020289	pif1	ENSDARG00000027063	arpc1b	ENSDARG00000008502	pno1	ENSDARG00000007149	nadl1.2	ENSDARG00000015879	pax8	ENSDARG00000009875	raf1a	ENSDARG00000040649	prickle1a	ENSDARG00000041754	cct2	ENSDARG00000013965	cul2
ENSDARG00000008969	fgb	ENSDARG00000037654	pmm2	ENSDARG00000020676	dpp3	ENSDARG00000030020	agfg1a	ENSDARG00000008982	casq2	ENSDARG00000007430	PRDM12	ENSDARG00000016139	mkks	ENSDARG00000010432	eaf2	ENSDARG00000044153	ppp1cb	ENSDARG00000043443	kcnj13	ENSDARG00000014091	osr1
ENSDARG00000009961	rundc3b	ENSDARG00000040432	klf2b	ENSDARG00000021366	fbp1a	ENSDARG00000030161	ppp1r14bb	ENSDARG00000009280	smyd1a	ENSDARG00000007654	nsfa	ENSDARG00000019353	sparc	ENSDARG00000010472	atp1a2a	ENSDARG00000045146	tomm22	ENSDARG00000044689	ttc8	ENSDARG00000014571	ctnnb1
ENSDARG00000011079	wdr3	ENSDARG00000040518	ssr1	ENSDARG00000024311	nsmce4a	ENSDARG00000030999	mybl1	ENSDARG00000009438	myog	ENSDARG00000007663	amph	ENSDARG00000021442	cdh11	ENSDARG00000010655	ppm1k	ENSDARG00000052139	notch3	ENSDARG00000055357	leo1	ENSDARG00000014673	fzd9b
ENSDARG00000011272	MNF1	ENSDARG00000045129	fkbp10b	ENSDARG00000028086	zbtb2b	ENSDARG00000035750	ccnd1	ENSDARG00000010978	trmt1	ENSDARG00000007792	dyx1c1	ENSDARG00000021664	fzd3a	ENSDARG00000011400	tnnc1a	ENSDARG00000053493	aldh1a2	ENSDARG00000059911	bbs7	ENSDARG00000014796	wnt11r
ENSDARG00000011521	upb1	ENSDARG00000045146	tomm22	ENSDARG00000031293	dnajc9	ENSDARG00000036299	nucb2a	ENSDARG00000011615	mybpc3	ENSDARG00000007804	gas6	ENSDARG00000026473	six1b	ENSDARG00000011648	snrpd1	ENSDARG00000054807	sec13	ENSDARG00000067920	rab8a	ENSDARG00000014986	acvr1l
ENSDARG00000015564	dhcr7	ENSDARG00000052170	uap1	ENSDARG00000031651	slc29a1	ENSDARG00000038097	pigq	ENSDARG00000012002	slc38a7	ENSDARG00000007867	dazap2	ENSDARG00000031891	tbx1	ENSDARG00000012820	nop56	ENSDARG00000056314	a2ml	ENSDARG00000069989	bnc2	ENSDARG00000016744	fbn2b
ENSDARG00000016706	atic	ENSDARG00000055115	dtnbp1a	ENSDARG00000033978	nxn	ENSDARG00000038643	alas2	ENSDARG00000012790	tmem161a	ENSDARG00000007982	onecut1	ENSDARG00000034894	wnt5b	ENSDARG00000013705	ccm2	ENSDARG00000058868	apc	ENSDARG00000070433	vps18	ENSDARG00000017321	kdr
ENSDARG00000017549	phyh	ENSDARG00000055381	bambia	ENSDARG00000034174	mrrf	ENSDARG00000039020	fbxo5	ENSDARG00000013274	eif4eb	ENSDARG00000008434	bcl2l1	ENSDARG00000040111	pi4kb	ENSDARG00000014098	pkd2	ENSDARG00000070061	gfer	ENSDARG00000070818	pax7b	ENSDARG00000018476	pak2b
ENSDARG00000017821	gata5	ENSDARG00000057633	cxcr4a	ENSDARG00000035470	sh3glb2b	ENSDARG00000040163	prim1	ENSDARG00000013415	lmna	ENSDARG00000008808	eml2	ENSDARG00000040485	dfna5	ENSDARG00000014571	ctnnb1	ENSDARG00000070903	met	ENSDARG00000074471	vps39	ENSDARG00000019258	elmo1
ENSDARG00000018004	nkx2.5	ENSDARG00000058734	prdx1	ENSDARG00000036136	tipin	ENSDARG00000040485	dfna5	ENSDARG00000013841	abl2	ENSDARG00000009001	pdip5	ENSDARG00000040893	bmper	ENSDARG00000014796	wnt11r	ENSDARG00000078416	zeb2b	ENSDARG00000075169	bbs1	ENSDARG00000019930	tal1
ENSDARG00000018593	parp16	ENSDARG00000070006	rcn1	ENSDARG00000036427	slc3a2a	ENSDARG00000042272	tmem231	ENSDARG00000014793	ehd1b	ENSDARG00000009106	serinc1	ENSDARG00000044751	ddt	ENSDARG00000014986	acvr1l			ENSDARG00000091419	nrarpa	ENSDARG00000020242	fermt2
ENSDARG00000019137	tram1	ENSDARG00000070682	sdf4	ENSDARG00000036878	sh3bgrl2	ENSDARG00000042310	blvrb	ENSDARG00000014963	triap1	ENSDARG00000009336	aif1l	ENSDARG00000052846	fsta	ENSDARG00000015681	gsk3ab					ENSDARG00000020442	snx5
ENSDARG00000019150	foxa1	ENSDARG00000077641	thbs3a	ENSDARG00000037706	gss	ENSDARG00000042894	tyms	ENSDARG00000015546	alp	ENSDARG00000009563	slc1a2b	ENSDARG00000053569	sox3	ENSDARG00000016139	mkks					ENSDARG00000020469	map3k7
ENSDARG00000019236	gsr			ENSDARG00000038858	setd7	ENSDARG00000043154	ucp2	ENSDARG00000016733	psat1	ENSDARG00000009743	efhc1	ENSDARG00000055294	atoh1a	ENSDARG00000016404	ptch1					ENSDARG00000020785	lama4
ENSDARG00000019444	ssr4			ENSDARG00000039208	nasp	ENSDARG00000043631	bcas2	ENSDARG00000018306	srl	ENSDARG00000009796	klc1a	ENSDARG00000056184	dvl2	ENSDARG00000016813	ccdc40					ENSDARG00000021664	fzd3a
ENSDARG00000019496	esd			ENSDARG00000039400	polr1c	ENSDARG00000043665	glrx5	ENSDARG00000018492	znf503	ENSDARG00000009886	rnf114	ENSDARG00000058692	fzd3b	ENSDARG00000017803	gsk3b					ENSDARG00000025718	cxxc1
ENSDARG00000020187	GCA			ENSDARG00000040644	acpl2	ENSDARG00000045305	pde7a	ENSDARG00000018745	psip1	ENSDARG00000010098	pank1b	ENSDARG00000058822	wnt3a	ENSDARG00000017821	gata5					ENSDARG00000027813	nus1
ENSDARG00000020241	icmt			ENSDARG00000040666	mki67ip	ENSDARG00000045802	hapln3	ENSDARG00000019304	phactr3b	ENSDARG00000010191	ttc39c	ENSDARG00000058868	apc	ENSDARG00000018004	nkx2.5					ENSDARG00000030125	sox7
ENSDARG00000020607	emc3			ENSDARG00000040861	tcf25	ENSDARG00000052815	alad	ENSDARG00000020072	thbs4b	ENSDARG00000010957	mpp2b	ENSDARG00000061974	grhl2b	ENSDARG00000018460	mbnl2					ENSDARG00000030307	hspa12b
ENSDARG00000020741	fga			ENSDARG00000041022	pdcd4b	ENSDARG00000053091	BDP1 (2 of 2)	ENSDARG00000020242	fermt2	ENSDARG00000011133	ccne1	ENSDARG00000071336	mif	ENSDARG00000018721	npnt					ENSDARG00000030364	angpt1
ENSDARG00000021059	alas1			ENSDARG00000041394	dnajb1b	ENSDARG00000054155	pcna	ENSDARG00000020397	snx15	ENSDARG00000011370	fyna	ENSDARG00000075211	chd7	ENSDARG00000019096	myl7					ENSDARG00000031894	lef1
ENSDARG00000022261	pdzk1			ENSDARG00000041600	wdr83	ENSDARG00000054302	EHD4	ENSDARG00000021346	pdhb	ENSDARG00000011459	gsna	ENSDARG00000077353	rerea	ENSDARG00000019728	bmpr1aa					ENSDARG00000032234	wnt2bb
ENSDARG00000023516	ctage5			ENSDARG00000041736	hsdl1	ENSDARG00000054632	fli1a	ENSDARG00000021984	ndufa2	ENSDARG00000011545	arrb2b	ENSDARG00000077467	sox10	ENSDARG00000019815	fn1					ENSDARG00000034358	jmjd6
ENSDARG00000024143	MGST3			ENSDARG00000042126	ELMO3	ENSDARG00000055120	ctsba	ENSDARG00000022968	fxr1	ENSDARG00000013575	rfx2	ENSDARG00000094673	rhoab	ENSDARG00000019930	tal1					ENSDARG00000034368	hexb
ENSDARG00000024717	selenbp1			ENSDARG00000042728	plaa	ENSDARG00000055753	suv39h1b	ENSDARG00000023028	cdv3	ENSDARG00000014017	rrm1	ENSDARG00000094992	otx1b	ENSDARG00000019969	smarcd3b					ENSDARG00000034894	wnt5b
ENSDARG00000025032	nr3c1			ENSDARG00000043884	nup43	ENSDARG00000055991	hmbsb	ENSDARG00000023963	tpm4a	ENSDARG00000014147	axin2			ENSDARG00000019995	bmp4					ENSDARG00000036115	krit1
ENSDARG00000025147	cd63			ENSDARG00000043986	setd6	ENSDARG00000058226	ak3	ENSDARG00000026862	aktip	ENSDARG00000014259	eya1			ENSDARG00000020053	nkd1					ENSDARG00000036571	sema3e
ENSDARG00000025338	hagh			ENSDARG00000045308	pola1	ENSDARG00000058246	cysltr1	ENSDARG00000027249	btg1	ENSDARG00000014420	elavl3			ENSDARG00000020242	fermt2					ENSDARG00000037429	tll1
ENSDARG00000025522	sgk1			ENSDARG00000045422	YAE1D1	ENSDARG00000062025	cpox	ENSDARG00000027582	angptl7	ENSDARG00000014746	rbfox1			ENSDARG00000020334	ptpn11a					ENSDARG00000038442	plcg1
ENSDARG00000027984	GSTZ1			ENSDARG00000045463	rala	ENSDARG00000062154	dip2c	ENSDARG00000027851	zgc:92218	ENSDARG00000015073	eng1b			ENSDARG00000021225	prkci					ENSDARG00000038446	nrp2b
ENSDARG00000028249	utp23			ENSDARG00000045900	agbl5	ENSDARG00000063588	uba5	ENSDARG00000029218	slc25a12	ENSDARG00000015554	zic2a			ENSDARG00000021509	tab2					ENSDARG00000039022	stk25b
ENSDARG00000029071	creld2			ENSDARG00000051855	gart	ENSDARG00000070261	crlf3	ENSDARG00000029439	atp2a2a	ENSDARG00000015901	ptbp2b			ENSDARG00000022968	fxr1					ENSDARG00000039041	sfrp5
ENSDARG00000029766	nr1i2			ENSDARG00000052419	ankrd12	ENSDARG00000079611	SEMA4C	ENSDARG00000029452	NEURL1B	ENSDARG00000015907	dcbld1			ENSDARG00000023878	stk24b					ENSDARG00000039957	rspo1
ENSDARG00000029795	fam213b			ENSDARG00000053225	gnl2	ENSDARG00000089124	hbae1	ENSDARG00000030176	ITGB1BP2	ENSDARG00000016038	ptplad1			ENSDARG00000023963	tpm4a					ENSDARG00000040346	ephb4a
ENSDARG00000030743	sptlc3			ENSDARG00000053855	RAB11FIP4 (1 of 2)	ENSDARG00000095019	lmo2	ENSDARG00000030402	twist1a	ENSDARG00000016526	gata3			ENSDARG00000024894	tbx5a					ENSDARG00000040614	sestd1
ENSDARG00000032175	puf60a			ENSDARG00000054164	MRPS17			ENSDARG00000032630	neb	ENSDARG00000016598	ckmt1			ENSDARG00000025309	dpf3					ENSDARG00000040778	ralba
ENSDARG00000032816	tm7sf2			ENSDARG00000054334	DCTPP1			ENSDARG00000032724	pmp22a	ENSDARG00000016676	gnao1a			ENSDARG00000026784	robo1					ENSDARG00000040893	bmper
ENSDARG00000032849	ndrg1a			ENSDARG00000054540	imp4			ENSDARG00000034568	fitm2	ENSDARG00000016813	ccdc40			ENSDARG00000029370	ankrd6b					ENSDARG00000040926	nr2f2
ENSDARG00000035831	gata6			ENSDARG00000060115	lrrn1			ENSDARG00000035005	bag2	ENSDARG00000016904	bckdk			ENSDARG00000029439	atp2a2a					ENSDARG00000041232	rps29
ENSDARG00000035858	cnn2			ENSDARG00000060394	FAM54A			ENSDARG00000035427	surf6	ENSDARG00000017294	gnai2			ENSDARG00000031891	tbx1					ENSDARG00000041450	rab11a
ENSDARG00000036041	f2			ENSDARG00000062152	chaf1a			ENSDARG00000036109	mtx1b	ENSDARG00000018259	atp1a3a			ENSDARG00000034624	nuf2					ENSDARG00000041530	ppih
ENSDARG00000036549	agpat3			ENSDARG00000071551	xrcc6			ENSDARG00000036252	rras2	ENSDARG00000018397	hpca			ENSDARG00000035427	surf6					ENSDARG00000041619	gnb2l1
ENSDARG00000036820	mgll			ENSDARG00000075559	ppm1g			ENSDARG00000036630	plp2	ENSDARG00000018605	TEKT1			ENSDARG00000035831	gata6					ENSDARG00000041869	tnfrsf19
ENSDARG00000037281	fgg			ENSDARG00000077506	tjp1			ENSDARG00000036865	slc2a12	ENSDARG00000018743	scamp5			ENSDARG00000036090	pard6gb					ENSDARG00000042561	lpar2b
ENSDARG00000037846	hm13			ENSDARG00000078680	vcana			ENSDARG00000037259	ndufb6	ENSDARG00000018788	st8sia2			ENSDARG00000036115	krit1					ENSDARG00000044074	loxl2b
ENSDARG00000037935	aldh16a1			ENSDARG00000078935	ttll4			ENSDARG00000037266	myoz2b	ENSDARG00000018921	fam84a			ENSDARG00000036194	pitx2					ENSDARG00000044213	lpar1
ENSDARG00000038106	slc37a4a			ENSDARG00000091610	mrps16			ENSDARG00000037618	ddit4	ENSDARG00000019038	sgsm3			ENSDARG00000036548	s1pr2					ENSDARG00000044601	rtn4a
ENSDARG00000038737	phf20b							ENSDARG00000038910	pccb	ENSDARG00000019473	kirrel3l			ENSDARG00000036987	has2					ENSDARG00000044827	wnt7aa
ENSDARG00000038865	acox3							ENSDARG00000039343	ahcyl2	ENSDARG00000019622	rims2a			ENSDARG00000038847	gins3					ENSDARG00000045444	fzd8a
ENSDARG00000039041	sfrp5							ENSDARG00000040614	sestd1	ENSDARG00000020158	spag6			ENSDARG00000039022	stk25b					ENSDARG00000052091	rbpjb
ENSDARG00000039459	qsox1							ENSDARG00000042751	riok3	ENSDARG00000020473	hddc3			ENSDARG00000039677	dsc2l					ENSDARG00000052094	notch1b
ENSDARG00000041895	cad							ENSDARG00000043640	cenpn	ENSDARG00000020521	exoc6			ENSDARG00000039827	bbs5					ENSDARG00000052148	ptgs1
ENSDARG00000042644	sod2							ENSDARG00000044011	xkrx	ENSDARG00000020761	arrdc2			ENSDARG00000040649	prickle1a					ENSDARG00000052470	igfbp2a
ENSDARG00000042684	serpinc1							ENSDARG00000046013	rasl11a	ENSDARG00000021455	strbp			ENSDARG00000041421	taz					ENSDARG00000054438	fzd2
ENSDARG00000042725	cebpb							ENSDARG00000052073	blcap	ENSDARG00000022682	add1			ENSDARG00000041572	zfpm1					ENSDARG00000054632	fli1a
ENSDARG00000043317	kita							ENSDARG00000052178	eif2s1	ENSDARG00000022712	stat3			ENSDARG00000044339	rp2					ENSDARG00000056228	pld1a
ENSDARG00000044047	slc18b1							ENSDARG00000053196	mtor	ENSDARG00000023174	fez1			ENSDARG00000044689	ttc8					ENSDARG00000056964	ilk
ENSDARG00000044339	rp2							ENSDARG00000053832	itm1	ENSDARG00000023921	dnaja2			ENSDARG00000045485	rassf8b					ENSDARG00000057633	cxcr4a
ENSDARG00000044809	fpgs							ENSDARG00000054906	ier5l	ENSDARG00000026611	socs3b			ENSDARG00000052004	cav1					ENSDARG00000058128	msna
ENSDARG00000045516	itih2							ENSDARG00000056369	ufsp2	ENSDARG00000026629	gmds			ENSDARG00000052091	rbpjb					ENSDARG00000058692	fzd3b
ENSDARG00000045888	acat1							ENSDARG00000056743	murc	ENSDARG00000026871	uchl1			ENSDARG00000052470	igfbp2a					ENSDARG00000059327	gata2a
ENSDARG00000052470	igfbp2a							ENSDARG00000056783	raraa	ENSDARG00000027199	smad1			ENSDARG00000052674	csnk1a1					ENSDARG00000059367	mfap2
ENSDARG00000052738	hmgcs1							ENSDARG00000056803	ap1s1	ENSDARG00000027602	LRFN1			ENSDARG00000054438	fzd2					ENSDARG00000059437	fktn
ENSDARG00000052816	shmt1							ENSDARG00000056892	mpp6a	ENSDARG00000027744	gadd45ba			ENSDARG00000055357	leo1					ENSDARG00000061203	trpc1
ENSDARG00000053684	aldob							ENSDARG00000057287	slc25a16	ENSDARG00000028148	pax2a			ENSDARG00000055639	ruvbl2					ENSDARG00000061479	thsd7a
ENSDARG00000054172	pgrmc1							ENSDARG00000057299	C10HXorf26	ENSDARG00000028661	cntfr			ENSDARG00000056184	dvl2					ENSDARG00000062451	FKRP (1 of 2)
ENSDARG00000056378	ifi30							ENSDARG00000057571	pgam2	ENSDARG00000029058	rbb4			ENSDARG00000058868	apc					ENSDARG00000062552	lpar6a
ENSDARG00000056387	rnf17							ENSDARG00000058011	arx	ENSDARG00000029064	uqcrq			ENSDARG00000059545	foxj1a					ENSDARG00000062579	kremen1
ENSDARG00000056640	rpia							ENSDARG00000058597	nt5c3	ENSDARG00000029263	hoxb3a			ENSDARG00000059911	bbs7					ENSDARG00000068064	sirt1
ENSDARG00000062757	zgc:158403							ENSDARG00000059234	mrps27	ENSDARG00000029356	mboat1			ENSDARG00000061052	nipblb					ENSDARG00000068213	fzd10
ENSDARG00000067805	ggcx							ENSDARG00000061397	trip12	ENSDARG00000029692	rufy3			ENSDARG00000061527	nxt2					ENSDARG00000068369	angptl2
ENSDARG00000069100	aldh9a1a							ENSDARG00000061981	lap3	ENSDARG00000029865	rassf2			ENSDARG00000061600	tmem2					ENSDARG00000070003	gng2
ENSDARG00000069422	nhp2							ENSDARG00000062222	mxra8a	ENSDARG00000030106	stmn4			ENSDARG00000062248	ptpn21					ENSDARG00000070050	sfrp2
ENSDARG00000071691	uqcrc2b							ENSDARG00000067544	par1	ENSDARG00000030656	spt3_			ENSDARG00000069922	popdc2					ENSDARG00000070425	dll4
ENSDARG00000076430	ep300a							ENSDARG00000068457	tnnt3b	ENSDARG00000030932	fgf10a			ENSDARG00000070623	med10					ENSDARG00000075621	birc5a
ENSDARG00000077620	cdca7a							ENSDARG00000070670	crip2	ENSDARG00000032738	dusp7			ENSDARG00000070795	eaf1					ENSDARG00000075710	rnf213a
ENSDARG00000078381	trip11							ENSDARG00000071060	naa10	ENSDARG00000032997	rnf185			ENSDARG00000071208	wnt4a					ENSDARG00000076564	hspg2
								ENSDARG00000071465	lrrc39	ENSDARG00000033140	desi1a			ENSDARG00000071465	lrrc39					ENSDARG00000077242	eif3ha
								ENSDARG00000074995	eif2b5	ENSDARG00000033234	stmn2a			ENSDARG00000074271	wrb					ENSDARG00000077264	wdr43
								ENSDARG00000075211	chd7	ENSDARG00000033498	rorb			ENSDARG00000075211	chd7					ENSDARG00000078335	amot
								ENSDARG00000077840	meis2b	ENSDARG00000033609	map1lc3a			ENSDARG00000075621	birc5a					ENSDARG00000089550	PBX1 (1 of 2)
								ENSDARG00000079782	vmhcl	ENSDARG00000035631	sdf2l1			ENSDARG00000075713	shox2					ENSDARG00000090779	ppp1cc
								ENSDARG00000079850	dchs1b	ENSDARG00000035648	irx4a			ENSDARG00000077226	smarca4					ENSDARG00000091419	nrarpa
								ENSDARG00000079996	stac3	ENSDARG00000035957	gmnn			ENSDARG00000078261	nphp3					ENSDARG00000091481	foxc1a
								ENSDARG00000094324	efemp2a	ENSDARG00000036505	syt4			ENSDARG00000078293	rbm24a					ENSDARG00000095019	lmo2
										ENSDARG00000037421	egr1
										ENSDARG00000037593	prickle2
										ENSDARG00000037997	tubb5
										ENSDARG00000038348	PIGH
										ENSDARG00000039677	dsc2l
										ENSDARG00000039701	emx2
										ENSDARG00000040291	cadm4
										ENSDARG00000040822	fundc1
										ENSDARG00000041204	hdac4
										ENSDARG00000041323	csdc2a
										ENSDARG00000041617	nme5
										ENSDARG00000041627	sncb
										ENSDARG00000042277	efnb3b
										ENSDARG00000042296	dlx5a
										ENSDARG00000042565	map3k12
										ENSDARG00000042826	egr2b
										ENSDARG00000043003	pcyt2
										ENSDARG00000043821	klf7b
										ENSDARG00000044062	ctbp2
										ENSDARG00000044073	fuca2
										ENSDARG00000044125	txn
										ENSDARG00000044688	dusp4
										ENSDARG00000045025	ift52
										ENSDARG00000045087	cdk5r1b
										ENSDARG00000045447	slc35g2b
										ENSDARG00000045639	elavl4
										ENSDARG00000045880	gas2l3
										ENSDARG00000045893	kctd15a
										ENSDARG00000051875	islr2
										ENSDARG00000052705	pkp1
										ENSDARG00000053303	map3k4
										ENSDARG00000053484	syne2b
										ENSDARG00000054749	lmo4b
										ENSDARG00000055043	depdc7
										ENSDARG00000055089	mab21l1
										ENSDARG00000055543	appb
										ENSDARG00000056027	hoxb8a
										ENSDARG00000056101	kcnd3
										ENSDARG00000056130	neurog1
										ENSDARG00000056532	serinc2
										ENSDARG00000056563	ppargc1b
										ENSDARG00000056638	pir
										ENSDARG00000056666	sp8b
										ENSDARG00000056680	stc2a
										ENSDARG00000056691	cpeb4
										ENSDARG00000058004	six2a
										ENSDARG00000058221	ugcg
										ENSDARG00000058868	apc
										ENSDARG00000058953	abcc4
										ENSDARG00000059680	fscn1a
										ENSDARG00000059900	tbc1d9
										ENSDARG00000060182	pdzd4
										ENSDARG00000060841	pik3c2a
										ENSDARG00000067741	itpkcb
										ENSDARG00000068461	C8H9orf3
										ENSDARG00000070080	nbeaa
										ENSDARG00000070266	spock3
										ENSDARG00000071395	camk2g1
										ENSDARG00000074521	map6
										ENSDARG00000074535	LINGO2 (1 of 2)
										ENSDARG00000074635	abca1a
										ENSDARG00000074671	nptx1l
										ENSDARG00000075020	ppapdc3
										ENSDARG00000075713	shox2
										ENSDARG00000076290	calrl2
										ENSDARG00000076833	atp1b1b
										ENSDARG00000086288	scg3
										ENSDARG00000086463
										ENSDARG00000094992	otx1b

## Sheet: GOexpression (DAVID)
Biological Process functions of genes up-regulated in D. rerio versus O. Latipes (DAVID)
Category	Term	Count	%	PValue	Genes	List.Total	Pop.Hits	Pop.Total	Fold.Enrichment	Bonferroni	Benjamini	FDR
GOTERM_BP_FAT	GO:0007242~intracellular signaling cascade	47	4.54985	4.31e-06	ENSDARG00000018602, ENSDARG00000018627, ENSDARG00000030106, ENSDARG00000017500, ENSDARG00000036252, ENSDARG00000020261, ENSDARG00000004218, ENSDARG00000045628, ENSDARG00000026845, ENSDARG00000077226, ENSDARG00000006553, ENSDARG00000068628, ENSDARG00000034771, ENSDARG00000006299, ENSDARG00000067920, ENSDARG00000026484, ENSDARG00000032765, ENSDARG00000015807, ENSDARG00000061829, ENSDARG00000052290,…	456	150	2803	1.92604	0.0048566	0.0048566	0.00691282
GOTERM_BP_FAT	GO:0007264~small GTPase mediated signal transduction	25	2.42014	0.000181	ENSDARG00000018627, ENSDARG00000018602, ENSDARG00000036252, ENSDARG00000020261, ENSDARG00000004218, ENSDARG00000026845, ENSDARG00000045628, ENSDARG00000006553, ENSDARG00000034771, ENSDARG00000068628, ENSDARG00000067920, ENSDARG00000026484, ENSDARG00000015807, ENSDARG00000052290, ENSDARG00000035084, ENSDARG00000042382, ENSDARG00000035924, ENSDARG00000041450, ENSDARG00000039162, ENSDARG00000017960,…	456	71	2803	2.16441	0.185315	0.0974011	0.290607
GOTERM_BP_FAT	GO:0014706~striated muscle tissue development	10	0.968054	0.000518	ENSDARG00000020242, ENSDARG00000008433, ENSDARG00000015681, ENSDARG00000003399, ENSDARG00000009438, ENSDARG00000019096, ENSDARG00000071465, ENSDARG00000009021, ENSDARG00000006272, ENSDARG00000030110	456	17	2803	3.61584	0.44324	0.177336	0.828121
GOTERM_BP_FAT	GO:0060537~muscle tissue development	10	0.968054	0.000518	ENSDARG00000020242, ENSDARG00000008433, ENSDARG00000015681, ENSDARG00000003399, ENSDARG00000009438, ENSDARG00000019096, ENSDARG00000071465, ENSDARG00000009021, ENSDARG00000006272, ENSDARG00000030110	456	17	2803	3.61584	0.44324	0.177336	0.828121
GOTERM_BP_FAT	GO:0035023~regulation of Rho protein signal transduction	8	0.774443	0.00106711	ENSDARG00000006299, ENSDARG00000032765, ENSDARG00000045528, ENSDARG00000011830, ENSDARG00000077114, ENSDARG00000022895, ENSDARG00000000086, ENSDARG00000019426	456	12	2803	4.09795	0.700752	0.260382	1.69859
GOTERM_BP_FAT	GO:0050877~neurological system process	11	1.06486	0.00117142	ENSDARG00000057770, ENSDARG00000060368, ENSDARG00000009021, ENSDARG00000018534, ENSDARG00000020607, ENSDARG00000000503, ENSDARG00000042826, ENSDARG00000040926, ENSDARG00000005574, ENSDARG00000011545, ENSDARG00000041133	456	22	2803	3.07346	0.73406	0.232715	1.86316
GOTERM_BP_FAT	GO:0048738~cardiac muscle tissue development	7	0.677638	0.00207312	ENSDARG00000020242, ENSDARG00000008433, ENSDARG00000015681, ENSDARG00000003399, ENSDARG00000019096, ENSDARG00000071465, ENSDARG00000006272	456	10	2803	4.30285	0.904158	0.323513	3.27509
GOTERM_BP_FAT	GO:0008104~protein localization	42	4.06583	0.00445456	ENSDARG00000038239, ENSDARG00000018602, ENSDARG00000002127, ENSDARG00000023190, ENSDARG00000026862, ENSDARG00000017010, ENSDARG00000020261, ENSDARG00000006272, ENSDARG00000045628, ENSDARG00000058504, ENSDARG00000052104, ENSDARG00000068628, ENSDARG00000034771, ENSDARG00000067920, ENSDARG00000026484, ENSDARG00000015807, ENSDARG00000052290, ENSDARG00000058543, ENSDARG00000009350, ENSDARG00000038066,…	456	171	2803	1.50977	0.993558	0.513588	6.91307
GOTERM_BP_FAT	GO:0051146~striated muscle cell differentiation	10	0.968054	0.00698573	ENSDARG00000008433, ENSDARG00000010478, ENSDARG00000015681, ENSDARG00000055635, ENSDARG00000003399, ENSDARG00000019096, ENSDARG00000009021, ENSDARG00000057633, ENSDARG00000030110, ENSDARG00000074849	456	23	2803	2.67258	0.999637	0.628496	10.6389
GOTERM_BP_FAT	GO:0042692~muscle cell differentiation	10	0.968054	0.00960957	ENSDARG00000008433, ENSDARG00000010478, ENSDARG00000015681, ENSDARG00000055635, ENSDARG00000003399, ENSDARG00000019096, ENSDARG00000009021, ENSDARG00000057633, ENSDARG00000030110, ENSDARG00000074849	456	24	2803	2.56122	0.999982	0.702509	14.3532
GOTERM_BP_FAT	GO:0019226~transmission of nerve impulse	7	0.677638	0.0109499	ENSDARG00000057770, ENSDARG00000060368, ENSDARG00000009021, ENSDARG00000018534, ENSDARG00000000503, ENSDARG00000042826, ENSDARG00000041133	456	13	2803	3.30989	0.999996	0.711818	16.1942
GOTERM_BP_FAT	GO:0007267~cell-cell signaling	7	0.677638	0.0109499	ENSDARG00000033999, ENSDARG00000060368, ENSDARG00000009021, ENSDARG00000018534, ENSDARG00000034894, ENSDARG00000000503, ENSDARG00000041133	456	13	2803	3.30989	0.999996	0.711818	16.1942
GOTERM_BP_FAT	GO:0015031~protein transport	38	3.67861	0.0124241	ENSDARG00000038239, ENSDARG00000018602, ENSDARG00000002127, ENSDARG00000023190, ENSDARG00000026862, ENSDARG00000017010, ENSDARG00000020261, ENSDARG00000045628, ENSDARG00000058504, ENSDARG00000052104, ENSDARG00000068628, ENSDARG00000034771, ENSDARG00000067920, ENSDARG00000026484, ENSDARG00000015807, ENSDARG00000052290, ENSDARG00000009350, ENSDARG00000038066, ENSDARG00000035084, ENSDARG00000041450,…	456	160	2803	1.4599	0.999999	0.723151	18.1762
GOTERM_BP_FAT	GO:0045184~establishment of protein localization	38	3.67861	0.0124241	ENSDARG00000038239, ENSDARG00000018602, ENSDARG00000002127, ENSDARG00000023190, ENSDARG00000026862, ENSDARG00000017010, ENSDARG00000020261, ENSDARG00000045628, ENSDARG00000058504, ENSDARG00000052104, ENSDARG00000068628, ENSDARG00000034771, ENSDARG00000067920, ENSDARG00000026484, ENSDARG00000015807, ENSDARG00000052290, ENSDARG00000009350, ENSDARG00000038066, ENSDARG00000035084, ENSDARG00000041450,…	456	160	2803	1.4599	0.999999	0.723151	18.1762
GOTERM_BP_FAT	GO:0001525~angiogenesis	10	0.968054	0.0129137	ENSDARG00000011473, ENSDARG00000030307, ENSDARG00000041232, ENSDARG00000017321, ENSDARG00000068369, ENSDARG00000010771, ENSDARG00000034894, ENSDARG00000052470, ENSDARG00000056228, ENSDARG00000019930	456	25	2803	2.45877	1	0.705936	18.8247
GOTERM_BP_FAT	GO:0007517~muscle organ development	12	1.16167	0.0148967	ENSDARG00000020242, ENSDARG00000008433, ENSDARG00000061219, ENSDARG00000015681, ENSDARG00000003399, ENSDARG00000009438, ENSDARG00000019096, ENSDARG00000071465, ENSDARG00000009021, ENSDARG00000006272, ENSDARG00000030110, ENSDARG00000011545	456	34	2803	2.1695	1	0.728722	21.4023
GOTERM_BP_FAT	GO:0055001~muscle cell development	7	0.677638	0.0165872	ENSDARG00000008433, ENSDARG00000010478, ENSDARG00000015681, ENSDARG00000019096, ENSDARG00000009021, ENSDARG00000057633, ENSDARG00000030110	456	14	2803	3.07346	1	0.716359	23.5387
GOTERM_BP_FAT	GO:0001568~blood vessel development	15	1.45208	0.0201139	ENSDARG00000011473, ENSDARG00000030307, ENSDARG00000017321, ENSDARG00000033999, ENSDARG00000012378, ENSDARG00000059367, ENSDARG00000020442, ENSDARG00000019930, ENSDARG00000041232, ENSDARG00000068369, ENSDARG00000052148, ENSDARG00000010771, ENSDARG00000034894, ENSDARG00000052470, ENSDARG00000056228	456	49	2803	1.88171	1	0.761891	27.8218
GOTERM_BP_FAT	GO:0048514~blood vessel morphogenesis	13	1.25847	0.0208069	ENSDARG00000011473, ENSDARG00000030307, ENSDARG00000012378, ENSDARG00000017321, ENSDARG00000020442, ENSDARG00000019930, ENSDARG00000041232, ENSDARG00000068369, ENSDARG00000052148, ENSDARG00000010771, ENSDARG00000034894, ENSDARG00000052470, ENSDARG00000056228	456	40	2803	1.99775	1	0.75282	28.6365
GOTERM_BP_FAT	GO:0007507~heart development	19	1.8393	0.0232539	ENSDARG00000008433, ENSDARG00000020242, ENSDARG00000015681, ENSDARG00000018693, ENSDARG00000019096, ENSDARG00000004251, ENSDARG00000041421, ENSDARG00000006272, ENSDARG00000019930, ENSDARG00000017821, ENSDARG00000052004, ENSDARG00000003399, ENSDARG00000071465, ENSDARG00000070623, ENSDARG00000017803, ENSDARG00000018441, ENSDARG00000010472, ENSDARG00000052470, ENSDARG00000075713	456	69	2803	1.69263	1	0.771695	31.445
GOTERM_BP_FAT	GO:0042471~ear morphogenesis	8	0.774443	0.0241433	ENSDARG00000014259, ENSDARG00000003399, ENSDARG00000018693, ENSDARG00000005762, ENSDARG00000019353, ENSDARG00000062727, ENSDARG00000040485, ENSDARG00000028148	456	19	2803	2.58818	1	0.766251	32.4397
GOTERM_BP_FAT	GO:0042472~inner ear morphogenesis	8	0.774443	0.0241433	ENSDARG00000014259, ENSDARG00000003399, ENSDARG00000018693, ENSDARG00000005762, ENSDARG00000019353, ENSDARG00000062727, ENSDARG00000040485, ENSDARG00000028148	456	19	2803	2.58818	1	0.766251	32.4397
GOTERM_BP_FAT	GO:0001944~vasculature development	15	1.45208	0.0282586	ENSDARG00000011473, ENSDARG00000030307, ENSDARG00000017321, ENSDARG00000033999, ENSDARG00000012378, ENSDARG00000059367, ENSDARG00000020442, ENSDARG00000019930, ENSDARG00000041232, ENSDARG00000068369, ENSDARG00000052148, ENSDARG00000010771, ENSDARG00000034894, ENSDARG00000052470, ENSDARG00000056228	456	51	2803	1.80792	1	0.802023	36.8692
GOTERM_BP_FAT	GO:0003007~heart morphogenesis	11	1.06486	0.0313747	ENSDARG00000017821, ENSDARG00000020242, ENSDARG00000015681, ENSDARG00000003399, ENSDARG00000071465, ENSDARG00000004251, ENSDARG00000017803, ENSDARG00000041421, ENSDARG00000010472, ENSDARG00000006272, ENSDARG00000019930	456	33	2803	2.04898	1	0.820092	40.0403
GOTERM_BP_FAT	GO:0001756~somitogenesis	10	0.968054	0.0428001	ENSDARG00000011473, ENSDARG00000052004, ENSDARG00000003399, ENSDARG00000018693, ENSDARG00000012378, ENSDARG00000033999, ENSDARG00000011662, ENSDARG00000006514, ENSDARG00000002336, ENSDARG00000035437	456	30	2803	2.04898	1	0.894263	50.4353
GOTERM_BP_FAT	GO:0042060~wound healing	7	0.677638	0.0445009	ENSDARG00000000779, ENSDARG00000026534, ENSDARG00000018693, ENSDARG00000070353, ENSDARG00000008969, ENSDARG00000020741, ENSDARG00000034894	456	17	2803	2.53109	1	0.893167	51.8296
GOTERM_BP_FAT	GO:0048568~embryonic organ development	18	1.7425	0.0510306	ENSDARG00000014259, ENSDARG00000018693, ENSDARG00000062727, ENSDARG00000059367, ENSDARG00000019930, ENSDARG00000077226, ENSDARG00000059362, ENSDARG00000052004, ENSDARG00000026534, ENSDARG00000003399, ENSDARG00000023542, ENSDARG00000005762, ENSDARG00000017929, ENSDARG00000019353, ENSDARG00000069093, ENSDARG00000040485, ENSDARG00000028148, ENSDARG00000042934	456	70	2803	1.58064	1	0.906287	56.8486
GOTERM_BP_FAT	GO:0009611~response to wounding	7	0.677638	0.0579265	ENSDARG00000000779, ENSDARG00000026534, ENSDARG00000018693, ENSDARG00000070353, ENSDARG00000008969, ENSDARG00000020741, ENSDARG00000034894	456	18	2803	2.39047	1	0.925237	61.6141
GOTERM_BP_FAT	GO:0048839~inner ear development	9	0.871249	0.0585708	ENSDARG00000014259, ENSDARG00000003399, ENSDARG00000018693, ENSDARG00000005762, ENSDARG00000019353, ENSDARG00000062727, ENSDARG00000001721, ENSDARG00000040485, ENSDARG00000028148	456	27	2803	2.04898	1	0.920023	62.0332
GOTERM_BP_FAT	GO:0043583~ear development	9	0.871249	0.0585708	ENSDARG00000014259, ENSDARG00000003399, ENSDARG00000018693, ENSDARG00000005762, ENSDARG00000019353, ENSDARG00000062727, ENSDARG00000001721, ENSDARG00000040485, ENSDARG00000028148	456	27	2803	2.04898	1	0.920023	62.0332
GOTERM_BP_FAT	GO:0016337~cell-cell adhesion	8	0.774443	0.0657936	ENSDARG00000018693, ENSDARG00000023542, ENSDARG00000020072, ENSDARG00000058543, ENSDARG00000068191, ENSDARG00000075978, ENSDARG00000006272, ENSDARG00000077641	456	23	2803	2.13806	1	0.929484	66.4468
GOTERM_BP_FAT	GO:0003002~regionalization	18	1.7425	0.0719098	ENSDARG00000006640, ENSDARG00000011473, ENSDARG00000018693, ENSDARG00000033999, ENSDARG00000012378, ENSDARG00000052846, ENSDARG00000011662, ENSDARG00000006514, ENSDARG00000010381, ENSDARG00000002336, ENSDARG00000056331, ENSDARG00000035437, ENSDARG00000052004, ENSDARG00000003399, ENSDARG00000026534, ENSDARG00000005645, ENSDARG00000028148, ENSDARG00000028071	456	73	2803	1.51568	1	0.934142	69.8032
GOTERM_BP_FAT	GO:0035282~segmentation	10	0.968054	0.0740168	ENSDARG00000011473, ENSDARG00000052004, ENSDARG00000003399, ENSDARG00000018693, ENSDARG00000012378, ENSDARG00000033999, ENSDARG00000011662, ENSDARG00000006514, ENSDARG00000002336, ENSDARG00000035437	456	33	2803	1.86271	1	0.933828	70.8847
GOTERM_BP_FAT	GO:0046578~regulation of Ras protein signal transduction	10	0.968054	0.0740168	ENSDARG00000067601, ENSDARG00000006299, ENSDARG00000032765, ENSDARG00000045528, ENSDARG00000011830, ENSDARG00000077114, ENSDARG00000013667, ENSDARG00000022895, ENSDARG00000000086, ENSDARG00000019426	456	33	2803	1.86271	1	0.933828	70.8847
GOTERM_BP_FAT	GO:0048562~embryonic organ morphogenesis	11	1.06486	0.0878992	ENSDARG00000014259, ENSDARG00000077226, ENSDARG00000026534, ENSDARG00000003399, ENSDARG00000018693, ENSDARG00000005762, ENSDARG00000019353, ENSDARG00000062727, ENSDARG00000059367, ENSDARG00000040485, ENSDARG00000028148	456	39	2803	1.73375	1	0.953009	77.1515
GOTERM_BP_FAT	GO:0022610~biological adhesion	14	1.35528	0.0973381	ENSDARG00000062797, ENSDARG00000018693, ENSDARG00000020072, ENSDARG00000068191, ENSDARG00000006272, ENSDARG00000004830, ENSDARG00000026531, ENSDARG00000023542, ENSDARG00000026165, ENSDARG00000010785, ENSDARG00000005762, ENSDARG00000058543, ENSDARG00000075978, ENSDARG00000077641	456	55	2803	1.56467	1	0.956176	80.664
GOTERM_BP_FAT	GO:0007155~cell adhesion	14	1.35528	0.0973381	ENSDARG00000062797, ENSDARG00000018693, ENSDARG00000020072, ENSDARG00000068191, ENSDARG00000006272, ENSDARG00000004830, ENSDARG00000026531, ENSDARG00000023542, ENSDARG00000026165, ENSDARG00000010785, ENSDARG00000005762, ENSDARG00000058543, ENSDARG00000075978, ENSDARG00000077641	456	55	2803	1.56467	1	0.956176	80.664
GOTERM_BP_FAT	GO:0043623~cellular protein complex assembly	9	0.871249	0.099821	ENSDARG00000038239, ENSDARG00000055649, ENSDARG00000010478, ENSDARG00000008969, ENSDARG00000020741, ENSDARG00000058560, ENSDARG00000009021, ENSDARG00000004672, ENSDARG00000045367	456	30	2803	1.84408	1	0.956159	81.5
Biological Process functions of genes Down-regulated in D. rerio versus O. Latipes (DAVID)
Category	Term	Count	%	PValue	Genes	List.Total	Pop.Hits	Pop.Total	Fold.Enrichment	Bonferroni	Benjamini	FDR
GOTERM_BP_FAT	GO:0055114~oxidation reduction	31	5.71956	4.15251e-07	ENSDARG00000057723, ENSDARG00000059388, ENSDARG00000035120, ENSDARG00000002249, ENSDARG00000053405, ENSDARG00000005891, ENSDARG00000059857, ENSDARG00000052734, ENSDARG00000077698, ENSDARG00000037935, ENSDARG00000028087, ENSDARG00000041736, ENSDARG00000043371, ENSDARG00000017781, ENSDARG00000075726, ENSDARG00000020054, ENSDARG00000062971, ENSDARG00000018426, ENSDARG00000053485, ENSDARG00000004406,…	181	178	2803	2.69703	0.000289388	0.000289388	0.000625863
GOTERM_BP_FAT	GO:0051186~cofactor metabolic process	11	2.02952	0.00751389	ENSDARG00000059857, ENSDARG00000052734, ENSDARG00000043371, ENSDARG00000077698, ENSDARG00000075132, ENSDARG00000061638, ENSDARG00000062042, ENSDARG00000078479, ENSDARG00000055893, ENSDARG00000023583, ENSDARG00000062594	181	65	2803	2.62074	0.994789	0.927812	10.7453
GOTERM_BP_FAT	GO:0006732~coenzyme metabolic process	9	1.66052	0.00893853	ENSDARG00000052734, ENSDARG00000043371, ENSDARG00000075132, ENSDARG00000061638, ENSDARG00000062042, ENSDARG00000078479, ENSDARG00000055893, ENSDARG00000023583, ENSDARG00000062594	181	47	2803	2.96544	0.998085	0.875824	12.6569
GOTERM_BP_FAT	GO:0051188~cofactor biosynthetic process	7	1.29151	0.0443183	ENSDARG00000077698, ENSDARG00000061638, ENSDARG00000062042, ENSDARG00000078479, ENSDARG00000055893, ENSDARG00000023583, ENSDARG00000062594	181	41	2803	2.64398	1	0.989041	49.501
GOTERM_BP_FAT	GO:0048598~embryonic morphogenesis	12	2.21402	0.0917087	ENSDARG00000078416, ENSDARG00000071336, ENSDARG00000027397, ENSDARG00000022712, ENSDARG00000016139, ENSDARG00000036577, ENSDARG00000037639, ENSDARG00000007641, ENSDARG00000016350, ENSDARG00000017953, ENSDARG00000002213, ENSDARG00000075169	181	110	2803	1.6894	1	0.997746	76.5376

## Sheet: GOexpression (PANTHER)
Biological Process functions of genes up-regulated in D. rerio versus O. Latipes (PANTHER)
Biological Process	Background	Up-regulated	expected	P-value	Fold Change
system process	605	158	93.04	6.19E-11	1.69819
neurological system process	541	133	83.20	8.41E-08	1.59856
cell communication	1312	271	201.77	1.14E-07	1.34311
cellular process	2087	399	320.96	1.96E-07	1.24315
vesicle-mediated transport	444	109	68.28	1.48E-06	1.59637
developmental process	995	207	153.02	3.69E-06	1.35276
system development	639	143	98.27	4.75E-06	1.45517
signal transduction	1237	247	190.24	6.72E-06	1.29836
synaptic transmission	174	51	26.76	1.49E-05	1.90583
transport	1016	204	156.25	3.93E-05	1.3056
neurotransmitter secretion	96	32	14.76	5.92E-05	2.16802
protein transport	700	146	107.65	1.15E-04	1.35625
intracellular protein transport	700	146	107.65	1.15E-04	1.35625
cell adhesion	369	86	56.75	1.16E-04	1.51542
blood circulation	24	13	3.69	1.23E-04	3.52304
mesoderm development	451	101	69.36	1.28E-04	1.45617
endocytosis	191	51	29.37	1.48E-04	1.73647
ectoderm development	456	100	70.13	2.87E-04	1.42592
synaptic vesicle exocytosis	42	17	6.46	3.82E-04	2.63158
regulation of liquid surface tension	14	9	2.15	3.95E-04	4.18605
cell-cell signaling	307	71	47.21	5.57E-04	1.50392
sensory perception of sound	40	16	6.15	6.33E-04	2.60163
protein targeting	88	27	13.53	7.46E-04	1.99557
muscle organ development	192	48	29.53	9.23E-04	1.62547
receptor-mediated endocytosis	68	22	10.46	1.15E-03	2.10325
cell motion	258	60	39.68	1.28E-03	1.5121
cell-cell adhesion	185	46	28.45	1.30E-03	1.61687
defense response to bacterium	24	11	3.69	1.51E-03	2.98103
cellular component morphogenesis	339	74	52.14	1.96E-03	1.41926
anatomical structure morphogenesis	339	74	52.14	1.96E-03	1.41926
nervous system development	417	88	64.13	2.00E-03	1.37221
homeostatic process	46	16	7.07	2.57E-03	2.26308
G-protein coupled receptor protein signaling pathway	217	50	33.37	3.72E-03	1.49835
muscle contraction	125	32	19.22	4.36E-03	1.66493
macrophage activation	45	15	6.92	5.03E-03	2.16763
sensory perception	185	43	28.45	5.89E-03	1.51142
intracellular signaling cascade	588	113	90.43	9.17E-03	1.24959
cation transport	153	36	23.53	9.29E-03	1.52996
amino acid transport	36	12	5.54	1.13E-02	2.16606
cell surface receptor linked signal transduction	543	103	83.51	1.74E-02	1.23339
lysosomal transport	17	7	2.61	1.75E-02	2.68199
pattern specification process	141	32	21.68	2.12E-02	1.47601
B cell mediated immunity	40	12	6.15	2.34E-02	1.95122
ion transport	192	41	29.53	2.45E-02	1.38842
neuromuscular synaptic transmission	23	8	3.54	2.80E-02	2.25989
angiogenesis	86	21	13.23	2.84E-02	1.5873
cellular component organization	496	93	76.28	2.97E-02	1.21919
exocytosis	130	29	19.99	3.29E-02	1.45073
cellular calcium ion homeostasis	20	7	3.08	3.72E-02	2.27273
localization	79	19	12.15	4.05E-02	1.56379
response to stimulus	379	72	58.29	4.08E-02	1.2352
immune response	90	21	13.84	4.25E-02	1.51734
protein amino acid phosphorylation	312	60	47.98	4.81E-02	1.25052
Biological Process functions of genes Down-regulated in D. rerio versus O. Latipes (PANTHER)
Biological Process	Background	Down-regulated	expected	P-value
steroid metabolic process	71	15	5.87	1.06E-03
lipid metabolic process	385	49	31.84	2.15E-03
cellular amino acid metabolic process	172	25	14.23	5.48E-03
cellular amino acid and derivative metabolic process	172	25	14.23	5.48E-03
carbohydrate metabolic process	338	41	27.96	1.04E-02
cholesterol metabolic process	39	8	3.23	1.73E-02
transmembrane receptor protein serine/threonine kinase signaling pathway	52	9	4.30	3.12E-02
response to toxin	36	7	2.98	3.20E-02
oxygen and reactive oxygen species metabolic process	29	6	2.40	3.53E-02
Unclassified	1893	176	156.57	3.93E-02
fatty acid metabolic process	73	11	6.04	4.33E-02
