# Supplementary material for: Comparative epigenomics in distantly related teleost species identifies conserved cis-regulatory nodes active during the vertebrate phylotypic period
Source: HighWire-hosted journal article supplement (doi:10.1101/gr.163915.113), 2014-04-07
Supplement: Supplemental_TableS3.xlsx [file Supplemental_TableS3.xlsx]

## Sheet: Hoja1
	Species	Hatching/delivery	Generation time	Eggs/spawn
	Zebrafish	< 60 hours	3 months	100-300
	Medaka	8 days	3 months	10-30
	Xenopus (tropicalis)	< 48 hours	4 months	1000-3000
	Mouse	21 days	2.5 months	10-15
