# Supplementary material for: Comparative epigenomics in distantly related teleost species identifies conserved cis-regulatory nodes active during the vertebrate phylotypic period
Source: HighWire-hosted journal article supplement (doi:10.1101/gr.163915.113), 2014-04-07
Supplement: Supplemental_TableS4.xlsx [file Supplemental_TableS4.xlsx]

## Sheet: Number of Peaks
	total H3K27ac peaks	non-promoter peaks	conserved with the other species	Not acetylated in H3K27 in the other species (OPARRs)	Acetylated in H3K27 in the other species (SPARRs)
Zebrafish	21041	8892	2733	2032	701
Medaka	24027	12938	4672	3992	680

## Sheet: medaka_SPARRs
chr1	2512719	2513337	MACS_peak_86	130.91
chr1	6229198	6232175	MACS_peak_225	1284.43
chr1	9714204	9714953	MACS_peak_248	62.21
chr1	10239455	10241040	MACS_peak_263	139.03
chr1	10555050	10555773	MACS_peak_276	67.16
chr1	10563393	10565725	MACS_peak_277	181.09
chr1	10608045	10608677	MACS_peak_282	58.97
chr1	11025510	11028437	MACS_peak_307	106.23
chr1	11028955	11031033	MACS_peak_308	309.31
chr1	11566723	11567644	MACS_peak_326	52.88
chr1	12242689	12244932	MACS_peak_355	153.8
chr1	16590431	16591646	MACS_peak_429	141.34
chr1	17708122	17709855	MACS_peak_484	52.64
chr1	17710433	17713520	MACS_peak_485	52.31
chr1	19595435	19596518	MACS_peak_527	50.3
chr1	21057318	21060125	MACS_peak_575	494.46
chr1	21068822	21071311	MACS_peak_576	203.64
chr1	21133476	21134474	MACS_peak_581	122.16
chr1	21169884	21170673	MACS_peak_582	107.67
chr1	21498961	21501296	MACS_peak_592	122.96
chr1	22031836	22035594	MACS_peak_601	190.38
chr1	22071279	22072847	MACS_peak_605	223.12
chr1	22895516	22897237	MACS_peak_632	273.84
chr1	23364079	23365610	MACS_peak_645	160.37
chr1	23454405	23455335	MACS_peak_653	53.9
chr1	32008464	32012126	MACS_peak_909	605.82
chr1	32146188	32147859	MACS_peak_917	66.37
chr1	32655139	32656736	MACS_peak_944	187.53
chr1	32673032	32675809	MACS_peak_946	142.98
chr10	2663359	2667697	MACS_peak_1197	154.48
chr10	4144455	4145663	MACS_peak_1228	108.13
chr10	4358077	4362764	MACS_peak_1234	404.35
chr10	4628142	4634679	MACS_peak_1244	227.43
chr10	4657686	4659646	MACS_peak_1248	88.52
chr10	5454455	5456600	MACS_peak_1263	79.4
chr10	5560410	5562685	MACS_peak_1274	168.28
chr10	5748437	5753167	MACS_peak_1287	143.62
chr10	6668226	6671495	MACS_peak_1311	160.02
chr10	6760791	6762728	MACS_peak_1319	208.77
chr10	6957936	6965374	MACS_peak_1325	162.05
chr10	6966911	6974148	MACS_peak_1326	72.44
chr10	6977043	6980926	MACS_peak_1327	298.49
chr10	6993905	7000670	MACS_peak_1328	99.05
chr10	7003834	7005125	MACS_peak_1329	326.27
chr10	7275114	7277602	MACS_peak_1349	224.98
chr10	7322389	7325995	MACS_peak_1355	340.04
chr10	8246584	8248732	MACS_peak_1403	405.73
chr10	9548804	9549958	MACS_peak_1431	112.49
chr10	9890717	9894004	MACS_peak_1435	930.96
chr10	10901377	10904902	MACS_peak_1476	1666.46
chr10	14375399	14377115	MACS_peak_1613	103.87
chr10	14460506	14461320	MACS_peak_1621	91.92
chr10	16895627	16897662	MACS_peak_1703	78.9
chr10	22908239	22909138	MACS_peak_1820	107.78
chr10	23095866	23097670	MACS_peak_1834	366.8
chr10	23124478	23127316	MACS_peak_1839	177.44
chr10	23151463	23153384	MACS_peak_1844	644.41
chr11	583731	586862	MACS_peak_2011	104.83
chr11	586907	588537	MACS_peak_2012	267.81
chr11	6570334	6571565	MACS_peak_2200	135.78
chr11	9068237	9072140	MACS_peak_2265	741.3
chr11	10488121	10489408	MACS_peak_2317	206.94
chr11	13759189	13759662	MACS_peak_2384	52.29
chr11	13781415	13783079	MACS_peak_2386	60.75
chr11	13851358	13853790	MACS_peak_2395	2272.87
chr11	15028568	15030132	MACS_peak_2418	338.93
chr11	16183527	16185725	MACS_peak_2456	129.49
chr11	16295539	16298134	MACS_peak_2461	110.68
chr11	17494481	17496289	MACS_peak_2533	761.23
chr11	18648130	18650450	MACS_peak_2582	196.21
chr11	18651906	18652912	MACS_peak_2583	145.35
chr11	21709765	21710916	MACS_peak_2721	123.87
chr11	22371543	22372080	MACS_peak_2766	258.2
chr11	22845558	22846188	MACS_peak_2798	75.62
chr11	23468583	23471209	MACS_peak_2828	211
chr11	23473115	23475262	MACS_peak_2829	97
chr11	28848892	28851422	MACS_peak_2934	361.78
chr11	28962612	28964763	MACS_peak_2939	251.25
chr12	2045764	2048305	MACS_peak_3028	485.44
chr12	2133169	2133955	MACS_peak_3032	71.1
chr12	3115576	3117464	MACS_peak_3083	103.92
chr12	3769852	3771050	MACS_peak_3115	175.69
chr12	7254852	7257125	MACS_peak_3241	201.08
chr12	7385893	7387861	MACS_peak_3250	934.31
chr12	8027501	8032745	MACS_peak_3278	98.96
chr12	11678700	11680771	MACS_peak_3417	60.43
chr12	12612646	12613640	MACS_peak_3476	94.86
chr12	15400769	15402910	MACS_peak_3586	210.25
chr12	15437020	15440631	MACS_peak_3591	784.18
chr12	15444050	15446052	MACS_peak_3592	461.28
chr12	15546411	15547579	MACS_peak_3602	57.95
chr12	16522712	16525272	MACS_peak_3626	196.79
chr12	17835608	17836221	MACS_peak_3649	61.23
chr12	22015069	22016032	MACS_peak_3718	110.29
chr12	22071261	22072733	MACS_peak_3722	148.99
chr12	23923322	23925101	MACS_peak_3767	341.97
chr12	25354632	25356451	MACS_peak_3818	342.68
chr12	27242742	27243748	MACS_peak_3852	56.99
chr13	1521437	1526871	MACS_peak_3957	211.92
chr13	4322873	4323898	MACS_peak_4082	121.7
chr13	4379704	4382696	MACS_peak_4089	235.5
chr13	4930137	4931199	MACS_peak_4106	156.9
chr13	4999735	5001178	MACS_peak_4111	132.84
chr13	5014143	5016278	MACS_peak_4112	398.03
chr13	5629407	5632338	MACS_peak_4123	189.65
chr13	5637043	5638590	MACS_peak_4124	151.4
chr13	5640898	5642510	MACS_peak_4125	56.86
chr13	5651904	5652787	MACS_peak_4127	149.44
chr13	5932102	5933108	MACS_peak_4144	90.77
chr13	6074182	6075062	MACS_peak_4150	66.87
chr13	9564893	9566881	MACS_peak_4294	464.98
chr13	9583618	9585138	MACS_peak_4295	289.09
chr13	10282990	10283895	MACS_peak_4308	90.67
chr13	10924691	10925202	MACS_peak_4331	63.33
chr13	12869858	12871818	MACS_peak_4392	217.3
chr13	13984056	13984706	MACS_peak_4443	60.17
chr13	14140287	14140989	MACS_peak_4455	50.4
chr13	15834051	15835753	MACS_peak_4497	114.53
chr13	17472049	17473470	MACS_peak_4558	151.92
chr13	22627687	22628623	MACS_peak_4753	63
chr13	24165609	24169068	MACS_peak_4774	290.58
chr13	24175735	24177268	MACS_peak_4775	66.44
chr13	24992249	24994790	MACS_peak_4796	647.67
chr13	25010102	25014833	MACS_peak_4797	290.16
chr13	29523405	29524188	MACS_peak_4926	55.13
chr13	31822801	31825056	MACS_peak_5020	204.47
chr13	31833163	31834080	MACS_peak_5021	125.33
chr14	1161682	1163327	MACS_peak_5092	438.91
chr14	1163400	1164637	MACS_peak_5093	51.14
chr14	10284954	10286293	MACS_peak_5298	180.52
chr14	13868848	13870690	MACS_peak_5414	394.3
chr14	13943723	13946087	MACS_peak_5419	507.51
chr14	14150063	14150965	MACS_peak_5428	58.32
chr14	15663349	15665067	MACS_peak_5497	237.74
chr14	16280868	16283178	MACS_peak_5522	974.51
chr14	22324558	22325154	MACS_peak_5720	63.55
chr14	22361605	22364492	MACS_peak_5722	309.32
chr14	23203520	23206949	MACS_peak_5764	262.86
chr14	23212929	23214430	MACS_peak_5765	173.77
chr14	28297771	28298928	MACS_peak_5845	151.57
chr14	28327168	28329312	MACS_peak_5846	308
chr14	29299713	29305406	MACS_peak_5896	756.34
chr14	29316849	29322457	MACS_peak_5897	309.33
chr14	31393385	31394501	MACS_peak_5947	206.7
chr14	32211069	32212895	MACS_peak_5966	423
chr15	2236249	2236981	MACS_peak_6054	114.3
chr15	3629398	3631164	MACS_peak_6093	275.38
chr15	3968990	3971317	MACS_peak_6111	62.91
chr15	3972205	3974839	MACS_peak_6112	162.19
chr15	10566322	10568334	MACS_peak_6308	301.74
chr15	10655438	10656073	MACS_peak_6317	87.53
chr15	11111566	11112771	MACS_peak_6341	152.34
chr15	11164216	11165080	MACS_peak_6345	59.68
chr15	15042749	15043782	MACS_peak_6452	106.14
chr15	15382475	15383510	MACS_peak_6463	116.95
chr15	15408001	15408886	MACS_peak_6466	237.25
chr15	15497151	15498061	MACS_peak_6472	241.13
chr15	20111301	20111934	MACS_peak_6630	92.95
chr15	20201341	20203135	MACS_peak_6634	96.09
chr15	20207307	20208493	MACS_peak_6635	116.62
chr15	20214490	20216016	MACS_peak_6636	96.83
chr15	20235591	20238578	MACS_peak_6638	104.55
chr15	20332872	20336693	MACS_peak_6642	238.1
chr15	20374876	20377600	MACS_peak_6646	183.83
chr15	20695989	20697962	MACS_peak_6656	78.53
chr15	20748126	20753703	MACS_peak_6661	359.26
chr15	20826387	20828187	MACS_peak_6668	200.23
chr15	21011463	21012451	MACS_peak_6679	133.41
chr15	22850447	22852413	MACS_peak_6760	396.91
chr15	22999168	22999981	MACS_peak_6768	65.36
chr15	23020400	23021256	MACS_peak_6769	74.57
chr15	23204420	23205324	MACS_peak_6784	71.56
chr15	23618394	23620422	MACS_peak_6803	381.35
chr15	25691183	25692048	MACS_peak_6845	108.82
chr15	26053164	26054664	MACS_peak_6868	155.76
chr15	26776944	26778565	MACS_peak_6896	82.71
chr15	26909639	26910466	MACS_peak_6906	62.46
chr15	26921956	26922899	MACS_peak_6907	52.67
chr15	26983662	26984638	MACS_peak_6912	67.15
chr15	26984748	26986114	MACS_peak_6913	134.06
chr15	27291678	27293040	MACS_peak_6931	159.13
chr15	27335321	27337991	MACS_peak_6936	218.83
chr15	28639076	28644716	MACS_peak_7022	400.63
chr15	28648666	28651720	MACS_peak_7023	275.68
chr15	28722650	28725158	MACS_peak_7031	458.69
chr15	29157192	29159571	MACS_peak_7050	96.72
chr16	833584	836650	MACS_peak_7117	868.94
chr16	1005801	1007389	MACS_peak_7119	299.56
chr16	2668043	2670569	MACS_peak_7185	259.33
chr16	6272633	6273966	MACS_peak_7287	294.15
chr16	8496274	8498811	MACS_peak_7341	502.29
chr16	8520452	8521353	MACS_peak_7343	106.82
chr16	8902371	8906024	MACS_peak_7355	278.36
chr16	10956938	10957740	MACS_peak_7418	88
chr16	12190028	12192829	MACS_peak_7473	269.14
chr16	12271263	12274146	MACS_peak_7480	158.68
chr16	12782934	12784577	MACS_peak_7506	120.2
chr16	12795071	12799528	MACS_peak_7507	331.16
chr16	12805738	12807819	MACS_peak_7508	405.92
chr16	12815709	12818922	MACS_peak_7509	288.09
chr16	12889614	12890953	MACS_peak_7516	97.53
chr16	13045929	13048536	MACS_peak_7528	413.03
chr16	13626335	13627291	MACS_peak_7562	82.04
chr16	13661942	13664295	MACS_peak_7567	75.47
chr16	13712432	13718244	MACS_peak_7570	349.28
chr16	15224975	15225621	MACS_peak_7644	113.25
chr16	15810370	15813436	MACS_peak_7676	142.33
chr16	15987906	15989477	MACS_peak_7693	361.37
chr16	16344600	16346362	MACS_peak_7708	60.96
chr16	16387770	16389864	MACS_peak_7712	140.78
chr16	17971673	17972603	MACS_peak_7798	125.44
chr16	18794445	18797923	MACS_peak_7823	497.07
chr16	19792415	19797653	MACS_peak_7859	155.77
chr16	20949779	20950603	MACS_peak_7902	113.31
chr16	21084318	21085415	MACS_peak_7909	115.77
chr16	21133108	21135749	MACS_peak_7913	368.33
chr16	21184506	21186200	MACS_peak_7914	147.75
chr16	23765037	23767227	MACS_peak_7989	111.17
chr16	24529689	24531739	MACS_peak_8006	301.78
chr16	26917089	26919956	MACS_peak_8095	78.15
chr16	26926998	26928688	MACS_peak_8097	248.73
chr16	29317421	29318150	MACS_peak_8180	129.35
chr16	29385444	29387983	MACS_peak_8182	1448.24
chr17	5532197	5533044	MACS_peak_8363	99.54
chr17	6021888	6023140	MACS_peak_8394	562.04
chr17	18898749	18901417	MACS_peak_8786	256.47
chr17	18908770	18910203	MACS_peak_8787	403.79
chr17	19434035	19435100	MACS_peak_8803	107.53
chr17	21359530	21361312	MACS_peak_8829	271.48
chr17	21473620	21474417	MACS_peak_8842	73.19
chr17	23361879	23363062	MACS_peak_8937	179.78
chr17	24099278	24100343	MACS_peak_8979	118.52
chr17	24948504	24949663	MACS_peak_9008	511.47
chr17	25004830	25006790	MACS_peak_9012	494.42
chr17	25032217	25034784	MACS_peak_9015	387.23
chr17	25166035	25167027	MACS_peak_9024	165.84
chr17	27757316	27759592	MACS_peak_9133	528.34
chr17	27807289	27808468	MACS_peak_9138	420.23
chr17	28050571	28052675	MACS_peak_9151	116.34
chr17	28059510	28060605	MACS_peak_9152	69.77
chr17	28132274	28133360	MACS_peak_9160	355.47
chr17	28329971	28331051	MACS_peak_9168	269.08
chr17	29296784	29297762	MACS_peak_9200	220.78
chr17	29323890	29325279	MACS_peak_9203	53
chr17	29327818	29330647	MACS_peak_9204	271.67
chr17	29393964	29394905	MACS_peak_9207	65.5
chr17	29394941	29395954	MACS_peak_9208	180.82
chr17	29523383	29524025	MACS_peak_9216	64.38
chr18	992849	994703	MACS_peak_9325	143.88
chr18	5650614	5651201	MACS_peak_9426	75.62
chr18	6211164	6212258	MACS_peak_9442	112.18
chr18	14018632	14020287	MACS_peak_9605	199.62
chr18	16462952	16464297	MACS_peak_9680	132.21
chr18	17504655	17506661	MACS_peak_9704	921.71
chr18	17822064	17822932	MACS_peak_9725	143.65
chr18	19809568	19811758	MACS_peak_9800	508.42
chr18	21955521	21958008	MACS_peak_9856	231.55
chr18	29300912	29303134	MACS_peak_10000	404.23
chr19	2358643	2359114	MACS_peak_10091	51.74
chr19	2436747	2438607	MACS_peak_10097	111.86
chr19	2457171	2458017	MACS_peak_10098	71.74
chr19	3173226	3175729	MACS_peak_10146	674.37
chr19	4384567	4385715	MACS_peak_10169	51.47
chr19	4565826	4567225	MACS_peak_10174	140.13
chr19	8756383	8759503	MACS_peak_10310	457.07
chr19	9030186	9032229	MACS_peak_10330	227.13
chr19	14616454	14617576	MACS_peak_10506	213.02
chr19	14766544	14770240	MACS_peak_10514	381.86
chr19	16626395	16628946	MACS_peak_10572	346.53
chr19	17037941	17039789	MACS_peak_10591	414.22
chr19	17061157	17062858	MACS_peak_10592	525.33
chr19	17544105	17548149	MACS_peak_10609	277.56
chr19	20573800	20574831	MACS_peak_10693	247.22
chr2	6676645	6677250	MACS_peak_10857	62.8
chr2	17085206	17087201	MACS_peak_10980	173.58
chr2	17121505	17123430	MACS_peak_10982	352.95
chr2	19053683	19054563	MACS_peak_11038	70.74
chr2	19084159	19090329	MACS_peak_11041	245.99
chr2	19161297	19162467	MACS_peak_11047	207.75
chr2	19260271	19262332	MACS_peak_11052	449.88
chr2	19367328	19368738	MACS_peak_11058	252.36
chr2	20099963	20101869	MACS_peak_11089	155.36
chr2	24655978	24657467	MACS_peak_11252	218.67
chr2	25260254	25262906	MACS_peak_11264	63.06
chr2	25264505	25266320	MACS_peak_11265	347.91
chr2	25273100	25274882	MACS_peak_11266	86.32
chr2	28858160	28859189	MACS_peak_11350	103.08
chr20	4808880	4811736	MACS_peak_11551	167.73
chr20	5363342	5364563	MACS_peak_11590	102.4
chr20	6912952	6914666	MACS_peak_11663	197.96
chr20	6957244	6960118	MACS_peak_11667	654.79
chr20	8497092	8501506	MACS_peak_11722	494.77
chr20	8527305	8527993	MACS_peak_11726	62.88
chr20	8881928	8882684	MACS_peak_11730	144.48
chr20	10741015	10742660	MACS_peak_11790	93.22
chr20	10751223	10752964	MACS_peak_11792	140.45
chr20	10766972	10767957	MACS_peak_11793	120.32
chr20	10825381	10826954	MACS_peak_11796	245.66
chr20	10826960	10828188	MACS_peak_11797	53.78
chr20	11722687	11724155	MACS_peak_11826	407.18
chr20	11892490	11895541	MACS_peak_11832	63.22
chr20	11895858	11898248	MACS_peak_11833	149.97
chr20	12997961	12998587	MACS_peak_11865	203.18
chr20	13006324	13007129	MACS_peak_11867	60.57
chr20	13340712	13342063	MACS_peak_11886	78.63
chr20	14391417	14392847	MACS_peak_11919	91.93
chr20	14616328	14617705	MACS_peak_11930	74.84
chr20	14635996	14637378	MACS_peak_11933	147.58
chr20	14644410	14645236	MACS_peak_11934	55.78
chr20	14656634	14658123	MACS_peak_11936	95.22
chr20	15257460	15258613	MACS_peak_11962	290.54
chr20	15488089	15490978	MACS_peak_11977	456.12
chr20	15816189	15820157	MACS_peak_11996	691.9
chr20	15823535	15828764	MACS_peak_11997	413.97
chr20	15846319	15848739	MACS_peak_11999	376.97
chr20	15853141	15857231	MACS_peak_12000	217.9
chr20	16277721	16278958	MACS_peak_12017	82.98
chr20	16489410	16491677	MACS_peak_12030	1574.2
chr20	16549208	16551866	MACS_peak_12034	492.46
chr20	16724585	16725564	MACS_peak_12048	78.13
chr20	16788189	16789863	MACS_peak_12050	157.96
chr20	16825230	16826630	MACS_peak_12054	101.33
chr20	16834331	16837247	MACS_peak_12055	524.97
chr20	17949097	17951246	MACS_peak_12110	113.78
chr21	6413597	6415399	MACS_peak_12399	360.85
chr21	9273615	9275963	MACS_peak_12481	189.81
chr21	9304707	9308444	MACS_peak_12482	242.59
chr21	9318200	9322366	MACS_peak_12483	487.68
chr21	9480469	9484227	MACS_peak_12488	107.81
chr21	9494033	9497274	MACS_peak_12490	1178.13
chr21	9521272	9522810	MACS_peak_12492	77.86
chr21	11439468	11441495	MACS_peak_12562	462.67
chr21	12370546	12371808	MACS_peak_12597	178.5
chr21	12404529	12407034	MACS_peak_12601	124.6
chr21	17777663	17778492	MACS_peak_12743	55.58
chr21	20494924	20497088	MACS_peak_12840	473.02
chr21	28201854	28205442	MACS_peak_13112	221.75
chr21	31240331	31241168	MACS_peak_13193	88.52
chr22	3869466	3873063	MACS_peak_13338	680.79
chr22	3939621	3941603	MACS_peak_13344	141.83
chr22	5113760	5116152	MACS_peak_13392	321.74
chr22	5213525	5214162	MACS_peak_13403	197.53
chr22	6147491	6148529	MACS_peak_13425	167.14
chr22	6736448	6740857	MACS_peak_13457	278.36
chr22	6746295	6750089	MACS_peak_13458	359.33
chr22	6751483	6756332	MACS_peak_13459	135.77
chr22	6759722	6764405	MACS_peak_13460	277.11
chr22	6781655	6788617	MACS_peak_13461	99.86
chr22	6811899	6813820	MACS_peak_13464	53.04
chr22	6882871	6884148	MACS_peak_13471	123.7
chr22	7430634	7432055	MACS_peak_13490	249.07
chr22	8190258	8194296	MACS_peak_13533	671.3
chr22	9014152	9016111	MACS_peak_13574	121.76
chr22	10031427	10034350	MACS_peak_13614	551.22
chr22	10182120	10183076	MACS_peak_13624	547.36
chr22	10202262	10205038	MACS_peak_13626	816.37
chr22	10217429	10219005	MACS_peak_13629	162.21
chr22	10332568	10336960	MACS_peak_13642	324.39
chr22	10915276	10918018	MACS_peak_13665	398.25
chr22	11656494	11658772	MACS_peak_13717	273.16
chr22	12284281	12284997	MACS_peak_13766	56.43
chr22	16320086	16321583	MACS_peak_13963	138.62
chr22	16434869	16436306	MACS_peak_13970	63.78
chr22	16534846	16536264	MACS_peak_13978	141.28
chr22	17175025	17177007	MACS_peak_14008	655.38
chr22	19370301	19370831	MACS_peak_14040	72.84
chr22	21380752	21381794	MACS_peak_14127	209.88
chr22	21412078	21414739	MACS_peak_14129	188.88
chr22	21563489	21564481	MACS_peak_14139	212.41
chr22	21564500	21566654	MACS_peak_14140	237.24
chr22	28708380	28709134	MACS_peak_14287	92.88
chr23	509485	513454	MACS_peak_14300	311.7
chr23	592607	594136	MACS_peak_14307	410.54
chr23	601498	603090	MACS_peak_14308	414.59
chr23	668613	671519	MACS_peak_14311	415.24
chr23	13411407	13413854	MACS_peak_14700	236.81
chr23	16115492	16118085	MACS_peak_14797	235.39
chr23	16137832	16138287	MACS_peak_14798	59.39
chr23	16138396	16139024	MACS_peak_14799	70.25
chr23	16235733	16236515	MACS_peak_14801	82.83
chr23	17768146	17769703	MACS_peak_14880	1076.71
chr23	19772270	19774921	MACS_peak_14922	512.13
chr23	20617766	20618623	MACS_peak_14940	67.6
chr24	5733854	5735428	MACS_peak_15238	129.95
chr24	6728959	6732049	MACS_peak_15303	50.23
chr24	7106092	7107605	MACS_peak_15322	435.49
chr24	7136891	7138530	MACS_peak_15324	84.62
chr24	8887757	8889456	MACS_peak_15412	127.8
chr24	8939247	8941666	MACS_peak_15415	199.66
chr24	8985225	8987222	MACS_peak_15417	237.54
chr24	14959247	14960913	MACS_peak_15623	471.17
chr24	19932590	19935946	MACS_peak_15761	452.52
chr24	21210268	21211594	MACS_peak_15807	64.02
chr24	21902300	21903649	MACS_peak_15817	97.01
chr24	21922845	21924866	MACS_peak_15819	209.44
chr3	3662264	3664058	MACS_peak_15979	255.44
chr3	5252498	5255061	MACS_peak_16033	228.76
chr3	9720798	9724485	MACS_peak_16110	755.33
chr3	9812283	9813739	MACS_peak_16118	159.94
chr3	9876501	9878080	MACS_peak_16123	262.8
chr3	10673906	10676597	MACS_peak_16141	191.38
chr3	10963253	10963913	MACS_peak_16157	86.46
chr3	11160834	11163446	MACS_peak_16165	419.85
chr3	11194511	11196861	MACS_peak_16167	348.98
chr3	11664184	11666392	MACS_peak_16198	431.78
chr3	13232118	13233492	MACS_peak_16270	100.62
chr3	15826486	15828585	MACS_peak_16328	494.56
chr3	16784702	16791040	MACS_peak_16370	482.04
chr3	16798024	16799592	MACS_peak_16371	184.7
chr3	17620660	17623521	MACS_peak_16410	252.41
chr3	17980813	17981469	MACS_peak_16421	151.63
chr3	18047985	18048905	MACS_peak_16427	139.49
chr3	18280764	18283584	MACS_peak_16434	429.85
chr3	18748690	18750266	MACS_peak_16452	140.02
chr3	18751492	18752363	MACS_peak_16453	77.91
chr3	19082213	19082746	MACS_peak_16467	71.9
chr3	19204733	19205854	MACS_peak_16471	74.87
chr3	19267514	19269025	MACS_peak_16475	183.81
chr3	19279330	19282535	MACS_peak_16476	59.71
chr3	20148571	20153337	MACS_peak_16504	271.71
chr3	20171487	20174362	MACS_peak_16507	149.89
chr3	20334937	20340104	MACS_peak_16519	1011.9
chr3	21192708	21194467	MACS_peak_16582	195.04
chr3	21201275	21202809	MACS_peak_16583	159.97
chr3	22101390	22102391	MACS_peak_16618	64.11
chr3	22156163	22159487	MACS_peak_16624	171.24
chr3	22176619	22178595	MACS_peak_16626	247.17
chr3	25324149	25325461	MACS_peak_16730	150.82
chr3	28210652	28213158	MACS_peak_16833	162.79
chr3	28313532	28316951	MACS_peak_16843	314.59
chr3	28363508	28366205	MACS_peak_16847	260.7
chr3	28413643	28415409	MACS_peak_16849	223.71
chr3	28571892	28573114	MACS_peak_16851	145.54
chr3	28596734	28598027	MACS_peak_16853	77.07
chr3	28626118	28632287	MACS_peak_16854	122.81
chr3	28886002	28887698	MACS_peak_16865	638.83
chr3	28898145	28900056	MACS_peak_16866	350.74
chr3	29087229	29094108	MACS_peak_16875	400.79
chr3	29221382	29225641	MACS_peak_16885	172.13
chr3	29230441	29232163	MACS_peak_16886	60.39
chr3	29272759	29277221	MACS_peak_16889	243.75
chr3	29309788	29310666	MACS_peak_16891	71.96
chr3	29496469	29499480	MACS_peak_16903	166.34
chr3	29582594	29584199	MACS_peak_16909	163.3
chr3	29699326	29703366	MACS_peak_16917	1053.6
chr3	29859433	29861427	MACS_peak_16931	287.59
chr3	30691901	30693135	MACS_peak_16962	139.59
chr3	31878732	31880443	MACS_peak_16985	313.02
chr3	36116266	36117628	MACS_peak_17062	303.72
chr3	36200082	36201057	MACS_peak_17068	72.1
chr4	733074	734970	MACS_peak_17107	219.26
chr4	817295	819104	MACS_peak_17114	1028.11
chr4	2345588	2347896	MACS_peak_17164	1728.74
chr4	2356929	2358143	MACS_peak_17165	551.32
chr4	2422024	2422700	MACS_peak_17170	63.3
chr4	4294119	4297314	MACS_peak_17244	761.91
chr4	4443229	4445090	MACS_peak_17251	54.94
chr4	5417685	5418304	MACS_peak_17284	55.61
chr4	7101134	7102354	MACS_peak_17346	502.18
chr4	8002329	8005136	MACS_peak_17379	468.72
chr4	8010654	8015078	MACS_peak_17381	91.16
chr4	8693441	8695730	MACS_peak_17413	699.19
chr4	10079743	10080479	MACS_peak_17471	57.59
chr4	10347461	10348876	MACS_peak_17478	222.32
chr4	10423410	10425546	MACS_peak_17481	587.84
chr4	10452681	10454914	MACS_peak_17483	451.87
chr4	12879807	12881380	MACS_peak_17538	90.67
chr4	13485825	13487961	MACS_peak_17572	112.25
chr4	13624605	13626371	MACS_peak_17590	90.72
chr4	15571831	15573666	MACS_peak_17674	182.03
chr4	15868479	15869995	MACS_peak_17696	343.31
chr4	16421324	16423414	MACS_peak_17713	177.45
chr4	18152714	18153295	MACS_peak_17765	55.17
chr4	19687511	19690544	MACS_peak_17812	570.08
chr4	19809743	19810549	MACS_peak_17819	95.2
chr4	19831505	19836823	MACS_peak_17822	220.76
chr4	19870471	19871138	MACS_peak_17826	54.16
chr4	19898763	19900590	MACS_peak_17828	164.22
chr4	22887779	22890723	MACS_peak_17898	425.66
chr4	25936430	25938573	MACS_peak_18018	171.64
chr4	29549297	29552346	MACS_peak_18115	213.04
chr4	29681142	29682149	MACS_peak_18119	235.91
chr4	30630019	30632082	MACS_peak_18155	1350.66
chr4	31664932	31666498	MACS_peak_18221	54.42
chr4	31945893	31948191	MACS_peak_18234	250.77
chr4	32519749	32521588	MACS_peak_18261	190.83
chr4	32886431	32889313	MACS_peak_18283	340.88
chr4	33726989	33728082	MACS_peak_18304	90.03
chr5	1186158	1186599	MACS_peak_18382	50.05
chr5	5014261	5014995	MACS_peak_18500	71.74
chr5	7026936	7027654	MACS_peak_18567	163.37
chr5	7350933	7353151	MACS_peak_18582	56.22
chr5	8240545	8242479	MACS_peak_18621	236.87
chr5	9392031	9393339	MACS_peak_18665	89.41
chr5	9982200	9982936	MACS_peak_18682	165.38
chr5	11725552	11726946	MACS_peak_18735	416.39
chr5	11738423	11744107	MACS_peak_18737	261.08
chr5	15267151	15270417	MACS_peak_18836	752.47
chr5	15291268	15293669	MACS_peak_18840	276.59
chr5	15299410	15304148	MACS_peak_18841	264.89
chr5	17055601	17059325	MACS_peak_18923	413.63
chr5	17060778	17062030	MACS_peak_18924	94.7
chr5	21131752	21133605	MACS_peak_19036	1006.44
chr5	21291775	21293084	MACS_peak_19045	103.73
chr5	24152000	24154894	MACS_peak_19108	473.42
chr5	24158418	24160323	MACS_peak_19109	463.54
chr5	24239490	24241627	MACS_peak_19113	1364.81
chr5	24251363	24254394	MACS_peak_19114	260.37
chr5	25191895	25192709	MACS_peak_19147	62.39
chr5	26597861	26599990	MACS_peak_19193	742.64
chr5	26607809	26609022	MACS_peak_19195	114.43
chr5	26622908	26624801	MACS_peak_19198	134.65
chr5	26841202	26842254	MACS_peak_19212	95.76
chr5	27981991	27983018	MACS_peak_19287	100.75
chr5	28359179	28360014	MACS_peak_19311	101.28
chr5	28814596	28816762	MACS_peak_19335	564.99
chr5	28845361	28847372	MACS_peak_19336	305.63
chr5	28851331	28852776	MACS_peak_19337	509.33
chr5	28870420	28874531	MACS_peak_19340	421.59
chr5	28996065	28998059	MACS_peak_19349	52.29
chr5	29002474	29007088	MACS_peak_19350	306.69
chr5	31149514	31151049	MACS_peak_19434	76.41
chr5	31994383	31995883	MACS_peak_19472	497.09
chr5	32298888	32301277	MACS_peak_19483	572.94
chr5	32477851	32479936	MACS_peak_19488	163.43
chr5	32481793	32484690	MACS_peak_19489	153.49
chr6	2449333	2453792	MACS_peak_19587	356.29
chr6	5473714	5475621	MACS_peak_19681	183.12
chr6	7466014	7467163	MACS_peak_19788	158.66
chr6	8598010	8599323	MACS_peak_19844	101.13
chr6	8704102	8705465	MACS_peak_19853	292.51
chr6	10254573	10259443	MACS_peak_19930	1043.19
chr6	11094242	11094964	MACS_peak_19981	55.55
chr6	11094965	11096170	MACS_peak_19982	106.87
chr6	11101526	11105347	MACS_peak_19983	89.34
chr6	11138015	11140737	MACS_peak_19986	59.2
chr6	11151840	11153740	MACS_peak_19987	84.7
chr6	11216308	11217929	MACS_peak_19991	618.82
chr6	11318045	11323168	MACS_peak_19999	260.28
chr6	11323911	11327035	MACS_peak_20000	721.2
chr6	11332238	11334415	MACS_peak_20001	111.75
chr6	11809135	11810120	MACS_peak_20024	53.56
chr6	12870017	12876828	MACS_peak_20079	203.15
chr6	12927347	12929468	MACS_peak_20083	129.81
chr6	12930730	12932029	MACS_peak_20084	71.63
chr6	13015137	13020090	MACS_peak_20091	100.05
chr6	13296126	13298832	MACS_peak_20104	661.69
chr6	13357587	13360320	MACS_peak_20107	729.85
chr6	13463369	13465981	MACS_peak_20114	261.43
chr6	13499200	13502886	MACS_peak_20115	271.43
chr6	13504909	13511378	MACS_peak_20116	86.07
chr6	13511739	13514352	MACS_peak_20117	69.69
chr6	13514368	13518013	MACS_peak_20118	146.28
chr6	13523369	13525576	MACS_peak_20119	783.44
chr6	13600236	13601331	MACS_peak_20128	74.63
chr6	13602104	13602998	MACS_peak_20129	111.96
chr6	13711579	13712129	MACS_peak_20137	57.73
chr6	13726685	13727764	MACS_peak_20138	171.26
chr6	13806067	13806976	MACS_peak_20141	82.59
chr6	13955444	13957025	MACS_peak_20149	149.72
chr6	16543929	16545433	MACS_peak_20251	195.88
chr6	16553252	16555582	MACS_peak_20253	181.72
chr6	16569983	16572398	MACS_peak_20256	224.14
chr6	16883734	16884883	MACS_peak_20272	142.54
chr6	21035949	21038763	MACS_peak_20370	365.73
chr6	21059781	21061266	MACS_peak_20372	82.48
chr6	21095106	21096413	MACS_peak_20373	263.33
chr6	21647816	21648353	MACS_peak_20395	65.5
chr6	23526084	23528202	MACS_peak_20489	327.32
chr6	23557610	23563173	MACS_peak_20492	1271.59
chr6	23570607	23572885	MACS_peak_20493	99.83
chr6	23627871	23629951	MACS_peak_20499	356.41
chr6	24527735	24528743	MACS_peak_20518	210.44
chr6	25865348	25867370	MACS_peak_20583	95.88
chr7	1674711	1675202	MACS_peak_20674	78.4
chr7	4429258	4430368	MACS_peak_20758	102.87
chr7	4490001	4492533	MACS_peak_20766	754.58
chr7	4925520	4927228	MACS_peak_20797	72.97
chr7	4955517	4956917	MACS_peak_20801	342.23
chr7	4975280	4979307	MACS_peak_20802	893.39
chr7	5654027	5655025	MACS_peak_20816	551.25
chr7	8339564	8342198	MACS_peak_20923	378.01
chr7	8743237	8743979	MACS_peak_20938	88.8
chr7	9745209	9745842	MACS_peak_20971	53.4
chr7	10147026	10149606	MACS_peak_20995	267.9
chr7	10193694	10196424	MACS_peak_21000	143.87
chr7	10203317	10204047	MACS_peak_21001	81.17
chr7	10251916	10252788	MACS_peak_21003	111.96
chr7	10273525	10275276	MACS_peak_21005	606.2
chr7	10339120	10340486	MACS_peak_21008	79.2
chr7	10463245	10465735	MACS_peak_21023	140.9
chr7	10473374	10478861	MACS_peak_21024	282.44
chr7	10490123	10493979	MACS_peak_21026	844.6
chr7	10528650	10530484	MACS_peak_21030	114.53
chr7	11556881	11562075	MACS_peak_21080	973.81
chr7	11714646	11716043	MACS_peak_21088	182.32
chr7	12157712	12160869	MACS_peak_21114	207.73
chr7	12408674	12410467	MACS_peak_21134	723.35
chr7	12764052	12765758	MACS_peak_21156	74.81
chr7	12788626	12791303	MACS_peak_21158	58.77
chr7	12799822	12802102	MACS_peak_21160	555.52
chr7	12955797	12959435	MACS_peak_21170	120.94
chr7	12967107	12968724	MACS_peak_21172	195.82
chr7	13010307	13011437	MACS_peak_21175	145.96
chr7	16052757	16054315	MACS_peak_21284	214.96
chr7	16059559	16060941	MACS_peak_21285	655.22
chr7	16073046	16074342	MACS_peak_21286	131.71
chr7	19878212	19879024	MACS_peak_21428	51.19
chr7	20763440	20764126	MACS_peak_21463	57.8
chr7	22069720	22070481	MACS_peak_21523	123.86
chr7	22647128	22650754	MACS_peak_21560	890.58
chr7	23214396	23217326	MACS_peak_21594	237.44
chr7	25078065	25078640	MACS_peak_21650	55.17
chr7	25203721	25206627	MACS_peak_21659	434.73
chr8	3325047	3326520	MACS_peak_21878	180.03
chr8	3718043	3720092	MACS_peak_21890	249.09
chr8	5007134	5008697	MACS_peak_21935	117.07
chr8	8172352	8173271	MACS_peak_22068	157.33
chr8	8468401	8469886	MACS_peak_22084	260.52
chr8	8588803	8591455	MACS_peak_22093	325.98
chr8	8610300	8611742	MACS_peak_22095	77.2
chr8	8832318	8836375	MACS_peak_22104	307.26
chr8	8851017	8853407	MACS_peak_22105	175.9
chr8	8854712	8856859	MACS_peak_22106	80.08
chr8	8872706	8877811	MACS_peak_22107	418.84
chr8	9127599	9132032	MACS_peak_22114	1117.03
chr8	9138106	9141640	MACS_peak_22115	683.18
chr8	9892114	9893678	MACS_peak_22164	115.17
chr8	10548607	10551249	MACS_peak_22200	90.21
chr8	10799698	10804809	MACS_peak_22212	169.12
chr8	11284218	11286689	MACS_peak_22247	250.72
chr8	12314449	12315788	MACS_peak_22298	110.9
chr8	12468018	12468917	MACS_peak_22306	87.94
chr8	13888858	13891093	MACS_peak_22375	365.31
chr8	19056780	19063547	MACS_peak_22495	251.97
chr8	19408841	19409839	MACS_peak_22522	61.15
chr8	20795801	20798291	MACS_peak_22587	498.51
chr8	20803951	20807371	MACS_peak_22588	688.48
chr9	923974	925096	MACS_peak_22827	162.19
chr9	2859216	2861841	MACS_peak_22879	198.94
chr9	4105538	4106012	MACS_peak_22914	68.72
chr9	8217300	8220247	MACS_peak_23083	255.56
chr9	8312713	8315062	MACS_peak_23089	220.63
chr9	8508370	8510905	MACS_peak_23104	777.31
chr9	11850584	11854308	MACS_peak_23208	196.52
chr9	15194089	15197198	MACS_peak_23370	408.43
chr9	15242757	15248647	MACS_peak_23373	243.87
chr9	15256123	15257879	MACS_peak_23374	56.88
chr9	15275302	15279994	MACS_peak_23376	552.88
chr9	15286120	15288571	MACS_peak_23377	177.78
chr9	15340406	15345657	MACS_peak_23380	637.35
chr9	15437105	15438035	MACS_peak_23391	82.15
chr9	15493518	15495274	MACS_peak_23399	56.44
chr9	15505221	15510842	MACS_peak_23400	106.04
chr9	15612644	15616830	MACS_peak_23404	410.12
chr9	15759619	15761832	MACS_peak_23407	454.95
chr9	15772547	15773821	MACS_peak_23408	110
chr9	16034319	16035498	MACS_peak_23422	262.05
chr9	17063996	17068263	MACS_peak_23469	233.87
chr9	17318632	17322346	MACS_peak_23487	141.74
chr9	17489955	17492641	MACS_peak_23499	117.08
chr9	17513745	17517439	MACS_peak_23500	317.27
chr9	17622817	17626916	MACS_peak_23512	227.56
chr9	18141777	18144778	MACS_peak_23537	662.77
chr9	18976890	18978168	MACS_peak_23583	252.32
chr9	19546977	19551010	MACS_peak_23602	2204.86
chr9	19867282	19872097	MACS_peak_23608	385.92
chr9	19883151	19888059	MACS_peak_23609	60.03
chr9	22678175	22679889	MACS_peak_23686	391.47
chr9	22722937	22725499	MACS_peak_23687	1198.51
chr9	22836847	22838394	MACS_peak_23696	181.1
chr9	24297547	24299701	MACS_peak_23769	424.35
chr9	25015737	25017181	MACS_peak_23782	116.73
chr9	25057876	25060333	MACS_peak_23786	337.5
chr9	25156155	25156858	MACS_peak_23790	74.41
chr9	26566980	26569533	MACS_peak_23831	335.81
chr9	27461818	27463415	MACS_peak_23854	62.38
chr9	32553444	32554834	MACS_peak_24004	928.08
chr9	32706102	32708027	MACS_peak_24013	283.53
chr9	33057878	33059234	MACS_peak_24024	181.33

## Sheet: zebrafish_SPARRs
Zv9_NA372	738	2847	MACS_peak_164	278.7
Zv9_NA372	84848	87245	MACS_peak_167	112.26
Zv9_NA48	82045	83333	MACS_peak_239	50.96
Zv9_NA48	125757	127788	MACS_peak_242	78.6
Zv9_NA761	36774	39854	MACS_peak_419	80.1
Zv9_NA991	883	1627	MACS_peak_518	59.92
Zv9_scaffold3455	378155	380516	MACS_peak_526	75.59
Zv9_scaffold3502	27706	28258	MACS_peak_580	53.31
Zv9_scaffold3504	54486	55366	MACS_peak_592	56.21
Zv9_scaffold3534	62718	63605	MACS_peak_640	73.27
chr1	4207839	4211034	MACS_peak_770	112.61
chr1	4217976	4221928	MACS_peak_771	168.81
chr1	6669509	6670199	MACS_peak_806	66.65
chr1	9273968	9275646	MACS_peak_835	88.55
chr1	14035009	14037089	MACS_peak_883	81.72
chr1	14038370	14043419	MACS_peak_884	71.24
chr1	17743539	17744834	MACS_peak_945	88.03
chr1	20596583	20599182	MACS_peak_980	157.94
chr1	22794821	22796171	MACS_peak_1014	76.99
chr1	24014537	24015426	MACS_peak_1034	80.28
chr1	24970910	24971938	MACS_peak_1047	58.85
chr1	26003605	26009099	MACS_peak_1064	74.15
chr1	26096070	26097715	MACS_peak_1067	128.98
chr1	26139946	26142267	MACS_peak_1069	206.1
chr1	28654250	28655355	MACS_peak_1089	87.99
chr1	30684608	30685653	MACS_peak_1119	78.47
chr1	35469724	35471034	MACS_peak_1166	75.37
chr1	35535639	35537726	MACS_peak_1169	97.85
chr1	41897397	41899461	MACS_peak_1259	209.24
chr1	46605584	46606611	MACS_peak_1328	87.63
chr1	48118022	48118739	MACS_peak_1368	60.54
chr1	51206862	51208730	MACS_peak_1395	129.85
chr1	51406830	51408683	MACS_peak_1398	107.73
chr10	4127261	4129668	MACS_peak_1602	81.4
chr10	4208789	4210455	MACS_peak_1606	75.15
chr10	10802174	10804247	MACS_peak_1720	313.43
chr10	10867231	10871139	MACS_peak_1726	111.6
chr10	10872635	10876760	MACS_peak_1727	57.93
chr10	11400248	11402175	MACS_peak_1743	91.17
chr10	11649967	11652301	MACS_peak_1748	97.98
chr10	15982629	15983575	MACS_peak_1794	64.89
chr10	16128502	16130931	MACS_peak_1801	138.15
chr10	27918952	27920977	MACS_peak_1962	193.99
chr10	27928331	27929692	MACS_peak_1963	65.25
chr10	36006075	36007154	MACS_peak_2087	105.05
chr10	36525439	36526597	MACS_peak_2110	53.15
chr10	39483097	39484609	MACS_peak_2141	75.89
chr10	43581594	43582951	MACS_peak_2183	65.46
chr10	45381138	45382261	MACS_peak_2223	85.08
chr11	1111056	1113099	MACS_peak_2276	120.78
chr11	2040858	2042127	MACS_peak_2296	68.47
chr11	2571537	2572870	MACS_peak_2313	63.63
chr11	6136095	6138295	MACS_peak_2359	237.94
chr11	7660164	7661620	MACS_peak_2392	124.86
chr11	7717311	7718751	MACS_peak_2395	84.01
chr11	7849371	7850759	MACS_peak_2398	128.98
chr11	8192590	8193556	MACS_peak_2401	54.03
chr11	16738369	16742482	MACS_peak_2514	103.09
chr11	16751580	16753324	MACS_peak_2515	72.65
chr11	16754673	16756573	MACS_peak_2516	71.45
chr11	16808777	16811317	MACS_peak_2520	218.72
chr11	19023591	19025330	MACS_peak_2551	117.83
chr11	19038507	19040843	MACS_peak_2553	65.64
chr11	19084758	19086368	MACS_peak_2556	93.19
chr11	22448074	22451167	MACS_peak_2611	184.03
chr11	22486450	22489689	MACS_peak_2613	81.15
chr11	22491715	22494970	MACS_peak_2614	124.48
chr11	22531659	22533247	MACS_peak_2615	98.12
chr11	22791768	22794280	MACS_peak_2625	148.03
chr11	22802793	22806887	MACS_peak_2626	67.1
chr11	26134203	26135297	MACS_peak_2697	97.27
chr11	27244167	27247354	MACS_peak_2727	141.82
chr11	27285223	27286807	MACS_peak_2730	129
chr11	28786547	28788506	MACS_peak_2760	161.62
chr11	29228194	29229704	MACS_peak_2768	120.02
chr11	29432422	29433981	MACS_peak_2772	91.9
chr11	29438613	29441183	MACS_peak_2773	116.3
chr11	36635310	36639311	MACS_peak_2848	134.64
chr11	37054924	37056296	MACS_peak_2856	115.21
chr11	38913427	38914491	MACS_peak_2886	70.22
chr11	38928493	38930309	MACS_peak_2888	204.48
chr11	40451193	40453441	MACS_peak_2907	150.46
chr11	40460171	40463574	MACS_peak_2908	176.62
chr11	42256889	42259987	MACS_peak_2926	258.79
chr11	45030014	45030849	MACS_peak_2976	58.92
chr12	23647302	23649381	MACS_peak_3361	128.94
chr12	23679485	23680622	MACS_peak_3362	100.78
chr12	24988931	24990011	MACS_peak_3381	65.93
chr12	28527117	28529449	MACS_peak_3456	82.26
chr12	28764897	28769360	MACS_peak_3465	160.35
chr12	29116762	29118625	MACS_peak_3478	92.54
chr12	31860244	31861788	MACS_peak_3507	103.53
chr12	32692138	32693893	MACS_peak_3521	123.31
chr12	33379021	33380645	MACS_peak_3538	126.92
chr12	36619610	36621254	MACS_peak_3594	59.48
chr12	36702665	36705409	MACS_peak_3596	70.68
chr12	36862924	36864634	MACS_peak_3606	56.7
chr12	37517446	37518135	MACS_peak_3618	64.97
chr12	38532660	38534534	MACS_peak_3641	112.99
chr12	38859536	38861256	MACS_peak_3647	52.77
chr13	1737926	1739609	MACS_peak_3771	99.08
chr13	5148752	5152334	MACS_peak_3836	116.51
chr13	5211567	5215024	MACS_peak_3840	86.17
chr13	5272757	5274282	MACS_peak_3842	52.55
chr13	6528975	6529628	MACS_peak_3871	59.83
chr13	9695176	9696191	MACS_peak_3912	70.53
chr13	9763425	9764267	MACS_peak_3915	73.61
chr13	9875876	9877499	MACS_peak_3917	105.58
chr13	13054234	13055278	MACS_peak_3966	82.39
chr13	13109275	13113486	MACS_peak_3967	139.1
chr13	13282730	13285115	MACS_peak_3973	113.58
chr13	17041631	17044751	MACS_peak_4013	174.92
chr13	17177210	17180911	MACS_peak_4017	117.92
chr13	17392461	17394978	MACS_peak_4027	96.95
chr13	17435749	17437704	MACS_peak_4030	80.06
chr13	17445583	17448425	MACS_peak_4031	101.6
chr13	17466274	17467934	MACS_peak_4033	80.15
chr13	17667070	17668037	MACS_peak_4039	61.37
chr13	22389804	22390956	MACS_peak_4106	88.2
chr13	23879765	23881344	MACS_peak_4134	135.87
chr13	24873628	24877674	MACS_peak_4164	94.42
chr13	25452468	25453688	MACS_peak_4184	104.95
chr13	28695074	28696680	MACS_peak_4228	59.14
chr13	29399475	29401096	MACS_peak_4244	89.6
chr13	30039193	30040762	MACS_peak_4250	138.67
chr13	30535649	30537636	MACS_peak_4262	288.59
chr13	30716973	30717890	MACS_peak_4270	52.42
chr13	30842621	30844712	MACS_peak_4276	65.59
chr13	31169264	31171627	MACS_peak_4283	100.74
chr13	31224798	31227035	MACS_peak_4286	269.33
chr13	31542175	31543258	MACS_peak_4290	101.42
chr13	32970376	32971983	MACS_peak_4314	152.64
chr13	33989964	33992067	MACS_peak_4343	119.08
chr13	34022004	34024081	MACS_peak_4344	126.17
chr13	34261619	34262376	MACS_peak_4352	50.82
chr13	34270558	34271435	MACS_peak_4353	56.51
chr13	34957819	34958911	MACS_peak_4358	86.59
chr13	35598800	35599791	MACS_peak_4368	89.8
chr13	35684446	35686328	MACS_peak_4374	50.28
chr13	43968586	43969378	MACS_peak_4478	99.78
chr13	46598030	46599009	MACS_peak_4505	54.33
chr13	46906610	46907621	MACS_peak_4513	95.48
chr13	48847378	48848557	MACS_peak_4543	97.14
chr13	52056584	52058321	MACS_peak_4598	92.21
chr13	52241609	52243190	MACS_peak_4606	244.21
chr14	8131297	8132338	MACS_peak_4760	82.13
chr14	18463788	18464533	MACS_peak_4845	56.35
chr14	18690408	18691632	MACS_peak_4853	53.2
chr14	27747661	27751048	MACS_peak_4999	223.83
chr14	27753615	27757244	MACS_peak_5000	53.3
chr14	28290142	28290979	MACS_peak_5003	72.42
chr14	31982912	31985004	MACS_peak_5050	81.25
chr14	31989688	31990872	MACS_peak_5051	59.03
chr14	32037084	32038561	MACS_peak_5054	59.1
chr14	32081833	32083565	MACS_peak_5056	122.53
chr14	32856549	32859012	MACS_peak_5073	124.73
chr14	32990375	32992377	MACS_peak_5078	107.76
chr14	33508638	33512031	MACS_peak_5083	113.88
chr14	33520653	33526540	MACS_peak_5084	102.23
chr14	33540107	33541500	MACS_peak_5085	92.54
chr14	33552043	33553577	MACS_peak_5086	69.65
chr14	33559203	33560216	MACS_peak_5087	182
chr14	33584713	33586971	MACS_peak_5088	114.85
chr14	33601965	33603124	MACS_peak_5089	58.26
chr14	33760175	33761546	MACS_peak_5097	53.71
chr14	33842240	33845215	MACS_peak_5103	68.59
chr14	33847022	33848393	MACS_peak_5104	60.28
chr14	34439615	34441121	MACS_peak_5120	93.76
chr14	34653581	34654408	MACS_peak_5128	68.75
chr14	36218725	36220043	MACS_peak_5143	67.45
chr14	40935199	40936698	MACS_peak_5198	73.83
chr14	41210459	41212666	MACS_peak_5200	82.58
chr14	41603431	41605069	MACS_peak_5208	60.71
chr14	41638230	41639384	MACS_peak_5209	50.67
chr14	42107368	42109947	MACS_peak_5215	200.78
chr14	48318679	48320187	MACS_peak_5272	170.94
chr15	1511366	1512478	MACS_peak_5364	59.58
chr15	7068149	7069155	MACS_peak_5431	57.11
chr15	8308293	8309440	MACS_peak_5445	101.94
chr15	8350853	8354186	MACS_peak_5446	101.09
chr15	8626423	8627384	MACS_peak_5453	88.27
chr15	9149574	9150687	MACS_peak_5466	63.2
chr15	10144925	10146160	MACS_peak_5472	117.59
chr15	10730901	10733385	MACS_peak_5478	75.83
chr15	15270729	15272089	MACS_peak_5540	70.97
chr15	15298988	15302810	MACS_peak_5542	61.53
chr15	17572914	17573526	MACS_peak_5585	73
chr15	18988911	18991496	MACS_peak_5598	87.31
chr15	22588070	22589090	MACS_peak_5660	68.96
chr15	25125634	25128210	MACS_peak_5728	133.35
chr15	26383874	26385253	MACS_peak_5739	78.21
chr15	34795966	34797166	MACS_peak_5887	71.17
chr15	36060155	36062710	MACS_peak_5899	78.63
chr16	453455	454715	MACS_peak_6022	67.51
chr16	515528	516021	MACS_peak_6023	70.97
chr16	938118	939476	MACS_peak_6027	81.85
chr16	3969620	3970751	MACS_peak_6050	101.51
chr16	15596520	15597625	MACS_peak_6223	157.03
chr16	16143331	16144961	MACS_peak_6232	108.9
chr16	16673580	16675457	MACS_peak_6234	92.67
chr16	18383219	18384406	MACS_peak_6247	84.31
chr16	18524716	18525537	MACS_peak_6252	69.04
chr16	21332526	21333855	MACS_peak_6286	110.06
chr16	21399045	21405064	MACS_peak_6289	105.49
chr16	21439761	21442862	MACS_peak_6290	114.18
chr16	21945625	21946961	MACS_peak_6293	52.17
chr16	22724765	22725532	MACS_peak_6302	56.06
chr16	27955771	27957158	MACS_peak_6417	124.24
chr16	31379159	31380428	MACS_peak_6476	84.24
chr16	31799972	31801496	MACS_peak_6483	110.38
chr16	34019281	34020668	MACS_peak_6524	175.79
chr16	34137280	34142526	MACS_peak_6528	72.77
chr16	34690646	34691949	MACS_peak_6546	97.14
chr16	34831166	34834532	MACS_peak_6549	156.25
chr16	35729227	35732611	MACS_peak_6564	156.42
chr16	35797484	35799778	MACS_peak_6565	60.76
chr16	35872391	35873095	MACS_peak_6567	62.8
chr16	36052467	36053791	MACS_peak_6572	104.27
chr16	39473818	39477004	MACS_peak_6607	71.33
chr16	42862966	42864217	MACS_peak_6670	92.2
chr16	44531165	44532905	MACS_peak_6696	176.56
chr16	45741821	45743243	MACS_peak_6730	95.29
chr16	49324601	49329348	MACS_peak_6769	224.34
chr16	49340635	49342257	MACS_peak_6770	64.65
chr16	55422909	55423895	MACS_peak_6841	81.3
chr17	12757857	12758857	MACS_peak_7034	59.92
chr17	16047026	16048765	MACS_peak_7083	130.02
chr17	21268534	21269459	MACS_peak_7141	107.5
chr17	24109489	24112585	MACS_peak_7191	77.91
chr17	24177342	24179755	MACS_peak_7193	213.49
chr17	25111073	25113088	MACS_peak_7218	190.09
chr17	26814406	26816843	MACS_peak_7257	77.06
chr17	28078807	28079950	MACS_peak_7280	79.23
chr17	33035501	33037139	MACS_peak_7360	67.07
chr17	33054903	33056303	MACS_peak_7362	70.25
chr17	33138666	33139580	MACS_peak_7364	61.48
chr17	33224939	33226128	MACS_peak_7366	77.51
chr17	34956531	34957863	MACS_peak_7400	128.75
chr17	35946033	35948902	MACS_peak_7420	73.97
chr17	36155310	36156901	MACS_peak_7431	55.15
chr17	36172447	36175448	MACS_peak_7432	212.57
chr17	36206810	36209681	MACS_peak_7433	137.22
chr17	36484993	36486377	MACS_peak_7436	99.34
chr17	36490750	36491813	MACS_peak_7437	66.72
chr17	37868021	37869962	MACS_peak_7461	73.27
chr17	37988508	37989985	MACS_peak_7467	76.27
chr17	41655362	41656485	MACS_peak_7515	97.91
chr17	42000085	42001248	MACS_peak_7518	70.08
chr17	46172213	46173169	MACS_peak_7573	75
chr17	51160279	51161856	MACS_peak_7616	95.85
chr17	53356398	53359444	MACS_peak_7647	199.77
chr17	53389790	53391620	MACS_peak_7648	61.96
chr17	53392783	53395111	MACS_peak_7649	71.19
chr17	53485919	53487547	MACS_peak_7652	57.24
chr17	53587644	53589145	MACS_peak_7653	73.13
chr18	8010746	8011617	MACS_peak_7748	97.87
chr18	9759041	9760789	MACS_peak_7760	160.53
chr18	14935857	14937609	MACS_peak_7834	80.23
chr18	14969531	14970691	MACS_peak_7836	109.49
chr18	14975121	14977418	MACS_peak_7837	99.8
chr18	14991033	14992125	MACS_peak_7838	63.71
chr18	17021823	17023085	MACS_peak_7865	50.59
chr18	17450937	17453208	MACS_peak_7876	56.5
chr18	17515481	17519143	MACS_peak_7879	131.89
chr18	17533431	17535347	MACS_peak_7881	134.32
chr18	19453419	19454453	MACS_peak_7924	55.94
chr18	19477546	19479595	MACS_peak_7926	185.47
chr18	19486531	19487903	MACS_peak_7927	88.83
chr18	19499048	19502368	MACS_peak_7928	103.85
chr18	19561435	19562205	MACS_peak_7933	64.03
chr18	19794593	19796039	MACS_peak_7939	67.67
chr18	20015689	20016735	MACS_peak_7949	71.42
chr18	20044065	20046127	MACS_peak_7950	81.22
chr18	20133897	20135033	MACS_peak_7955	53.13
chr18	20162039	20167366	MACS_peak_7957	50.6
chr18	20795162	20797163	MACS_peak_7971	62.19
chr18	23087416	23088522	MACS_peak_8012	121.72
chr18	23279277	23279912	MACS_peak_8014	51.75
chr18	23319323	23321328	MACS_peak_8015	109.2
chr18	23589916	23592748	MACS_peak_8018	150.16
chr18	23767438	23770598	MACS_peak_8027	216.24
chr18	23797899	23799272	MACS_peak_8029	102.31
chr18	23812857	23815784	MACS_peak_8030	64.53
chr18	23818835	23822673	MACS_peak_8031	139.13
chr18	23840939	23842836	MACS_peak_8032	90.73
chr18	23866184	23868086	MACS_peak_8033	72.81
chr18	23872459	23874562	MACS_peak_8034	403.83
chr18	24032432	24033795	MACS_peak_8038	168.99
chr18	24365376	24366521	MACS_peak_8045	99.9
chr18	24371242	24372964	MACS_peak_8046	117.64
chr18	24581691	24582359	MACS_peak_8050	57.86
chr18	25399668	25401205	MACS_peak_8063	73.98
chr18	25415257	25418018	MACS_peak_8064	99.88
chr18	25421309	25423144	MACS_peak_8065	65.38
chr18	25668722	25669661	MACS_peak_8071	50.93
chr18	25677751	25679381	MACS_peak_8072	81.18
chr18	25851231	25853562	MACS_peak_8079	93.6
chr18	30135631	30137487	MACS_peak_8127	200.8
chr18	30152181	30154672	MACS_peak_8128	62.4
chr18	32989183	32991055	MACS_peak_8163	151.65
chr18	35630921	35631827	MACS_peak_8199	68.67
chr18	35646422	35649389	MACS_peak_8201	145.33
chr18	35656670	35658732	MACS_peak_8202	70.89
chr18	35682493	35685183	MACS_peak_8205	118.12
chr18	38623060	38624711	MACS_peak_8238	171.22
chr18	41466012	41468534	MACS_peak_8274	93.93
chr18	41484498	41485609	MACS_peak_8275	84.43
chr18	41684868	41686052	MACS_peak_8281	120.53
chr18	42574127	42576058	MACS_peak_8294	137.74
chr18	42670264	42672003	MACS_peak_8296	123.68
chr18	48160474	48163331	MACS_peak_8374	146.85
chr19	2561992	2563588	MACS_peak_8451	81.77
chr19	6750202	6752297	MACS_peak_8511	94.44
chr19	6822127	6824567	MACS_peak_8515	285.76
chr19	8192157	8193841	MACS_peak_8547	53.55
chr19	9112235	9118052	MACS_peak_8561	87.71
chr19	9489733	9491595	MACS_peak_8570	59.69
chr19	15186603	15188532	MACS_peak_8661	156.58
chr19	19256635	19259381	MACS_peak_8722	236.89
chr19	21862030	21865890	MACS_peak_8759	110.93
chr19	22476300	22477176	MACS_peak_8767	61.37
chr19	22518512	22521372	MACS_peak_8768	205.29
chr19	26443487	26445393	MACS_peak_8849	56.39
chr19	26448416	26450892	MACS_peak_8850	98.19
chr19	28406006	28407321	MACS_peak_8881	82.1
chr19	28464546	28466626	MACS_peak_8884	171.35
chr19	28702926	28705336	MACS_peak_8886	110.33
chr19	31979609	31981413	MACS_peak_8947	104.39
chr19	32018727	32021135	MACS_peak_8949	101.03
chr19	32118626	32121830	MACS_peak_8956	269.11
chr19	32869617	32870721	MACS_peak_8973	107.37
chr19	33076236	33079464	MACS_peak_8979	70.24
chr19	34673497	34674913	MACS_peak_9009	141.61
chr19	36638955	36639819	MACS_peak_9033	54.69
chr19	41231206	41232006	MACS_peak_9076	50.31
chr19	44318464	44320002	MACS_peak_9124	111.76
chr2	1464139	1465386	MACS_peak_9257	124.63
chr2	1503115	1504925	MACS_peak_9259	202.29
chr2	2990439	2991875	MACS_peak_9277	142.8
chr2	7744528	7745380	MACS_peak_9347	62.99
chr2	10145469	10147659	MACS_peak_9382	96.61
chr2	11526640	11528435	MACS_peak_9408	63.57
chr2	11537176	11540505	MACS_peak_9409	406.5
chr2	20492374	20493576	MACS_peak_9493	50.69
chr2	21622604	21624080	MACS_peak_9525	55.42
chr2	21895012	21898599	MACS_peak_9538	247.41
chr2	24841351	24843545	MACS_peak_9599	212.72
chr2	25416941	25418298	MACS_peak_9609	59.6
chr2	27556953	27558160	MACS_peak_9653	144.01
chr2	33072289	33073668	MACS_peak_9738	66.39
chr2	33085243	33087003	MACS_peak_9739	79.99
chr2	33667057	33668983	MACS_peak_9748	165.78
chr2	33736183	33739657	MACS_peak_9752	109.19
chr2	33824600	33825625	MACS_peak_9756	71.75
chr2	33825635	33826980	MACS_peak_9757	56.36
chr2	35209052	35209896	MACS_peak_9761	53.55
chr2	43825550	43826821	MACS_peak_9922	78.79
chr2	47646777	47648703	MACS_peak_9968	105.7
chr20	6814498	6815752	MACS_peak_10203	93.65
chr20	10282251	10283928	MACS_peak_10235	146.93
chr20	10291944	10295097	MACS_peak_10236	162.18
chr20	10298208	10300996	MACS_peak_10237	82.62
chr20	13498788	13499860	MACS_peak_10258	121.68
chr20	14757985	14759985	MACS_peak_10272	115.5
chr20	20520125	20521213	MACS_peak_10354	64.75
chr20	21484454	21486620	MACS_peak_10369	91.67
chr20	23495138	23496478	MACS_peak_10408	69.95
chr20	23806598	23808114	MACS_peak_10423	109.44
chr20	24073310	24076047	MACS_peak_10428	75.03
chr20	24955383	24956398	MACS_peak_10435	68.19
chr20	24981853	24983608	MACS_peak_10438	107.94
chr20	25659381	25661631	MACS_peak_10449	186.51
chr20	32345076	32346581	MACS_peak_10599	154.07
chr20	32410421	32411940	MACS_peak_10602	104.51
chr20	33427023	33428719	MACS_peak_10622	74.09
chr21	4453534	4455036	MACS_peak_11017	93.01
chr21	11364440	11366760	MACS_peak_11124	143.41
chr21	11894628	11895779	MACS_peak_11131	93.09
chr21	14390774	14391936	MACS_peak_11160	71.88
chr21	16197926	16199657	MACS_peak_11182	200.59
chr21	16255713	16257540	MACS_peak_11183	76.89
chr21	18821262	18824211	MACS_peak_11218	215.61
chr21	22544749	22547563	MACS_peak_11287	195.08
chr21	22550370	22556588	MACS_peak_11288	89.66
chr21	22565806	22569262	MACS_peak_11289	171.18
chr21	28192198	28197511	MACS_peak_11388	90.57
chr21	28297794	28299520	MACS_peak_11393	139.42
chr21	28821728	28823973	MACS_peak_11401	78.32
chr21	32937571	32939288	MACS_peak_11448	158.4
chr21	36642336	36644232	MACS_peak_11507	65.18
chr21	36661833	36665720	MACS_peak_11508	67.91
chr22	11844610	11846024	MACS_peak_11903	106.63
chr22	15753634	15755675	MACS_peak_11954	318.23
chr22	16234830	16236807	MACS_peak_11970	110.84
chr22	17124321	17125938	MACS_peak_11993	106.54
chr22	18489038	18490367	MACS_peak_12013	60.2
chr22	18564174	18566283	MACS_peak_12017	232.26
chr22	18572484	18575141	MACS_peak_12018	323.92
chr22	18590181	18592469	MACS_peak_12020	329.95
chr22	19909613	19911562	MACS_peak_12042	142.59
chr22	19935278	19939848	MACS_peak_12043	72.52
chr22	21337352	21340572	MACS_peak_12064	398.24
chr22	21351613	21353229	MACS_peak_12065	115.7
chr22	27144055	27145423	MACS_peak_12132	122.92
chr22	40116159	40117518	MACS_peak_12269	93.34
chr22	40270539	40271703	MACS_peak_12272	59.69
chr22	40314538	40316955	MACS_peak_12275	101.03
chr22	40356179	40356971	MACS_peak_12279	57.84
chr22	40382381	40383282	MACS_peak_12280	86.18
chr23	91910	93026	MACS_peak_12324	75.14
chr23	1908966	1909776	MACS_peak_12358	56.16
chr23	1994406	1995919	MACS_peak_12360	69.4
chr23	2672908	2674209	MACS_peak_12382	98.48
chr23	2674212	2676969	MACS_peak_12383	293.53
chr23	7674783	7676968	MACS_peak_12452	435.71
chr23	7724657	7725503	MACS_peak_12456	94.97
chr23	7758810	7760656	MACS_peak_12458	153.45
chr23	9199985	9201225	MACS_peak_12471	52.85
chr23	13866468	13869345	MACS_peak_12534	242.11
chr23	13900352	13902654	MACS_peak_12536	77.56
chr23	19040614	19044727	MACS_peak_12604	134.92
chr23	20053037	20054797	MACS_peak_12639	96.69
chr23	20753468	20754420	MACS_peak_12656	57.31
chr23	21992007	21995258	MACS_peak_12682	190.35
chr23	22006758	22009824	MACS_peak_12683	150.15
chr23	23058193	23059128	MACS_peak_12700	55.69
chr23	23126072	23129925	MACS_peak_12704	116.36
chr23	23145354	23146961	MACS_peak_12706	58.95
chr23	23163198	23165788	MACS_peak_12708	67.29
chr23	23336278	23338781	MACS_peak_12714	116.03
chr23	23456939	23457976	MACS_peak_12719	91.53
chr23	23514168	23515539	MACS_peak_12721	102.09
chr23	23622250	23624566	MACS_peak_12724	98.06
chr23	23646901	23648842	MACS_peak_12726	71.72
chr23	23730591	23732803	MACS_peak_12730	127.95
chr23	27239092	27240084	MACS_peak_12819	91.91
chr23	27454101	27455944	MACS_peak_12829	198.37
chr23	28056075	28058538	MACS_peak_12846	239.46
chr23	28568804	28569799	MACS_peak_12862	56.6
chr23	29333165	29334189	MACS_peak_12875	56.93
chr23	30019066	30020118	MACS_peak_12892	53.68
chr23	32437183	32439840	MACS_peak_12942	121.97
chr23	32957339	32958293	MACS_peak_12952	84.22
chr23	33105834	33109458	MACS_peak_12955	157.44
chr23	35993202	35997601	MACS_peak_13015	102.97
chr23	36060314	36063036	MACS_peak_13018	204.56
chr23	36073545	36077709	MACS_peak_13019	159.91
chr23	36299741	36301424	MACS_peak_13025	59.15
chr23	36306067	36310004	MACS_peak_13026	200.88
chr23	36347412	36350047	MACS_peak_13028	315.89
chr23	36423249	36427454	MACS_peak_13032	246.09
chr23	38793949	38794504	MACS_peak_13062	50.17
chr23	39072871	39075194	MACS_peak_13072	212.18
chr23	39080794	39081863	MACS_peak_13073	123.69
chr23	39086043	39087776	MACS_peak_13074	226.76
chr24	4581722	4583488	MACS_peak_13240	105.72
chr24	4664562	4666412	MACS_peak_13243	54.69
chr24	4971182	4973303	MACS_peak_13247	145.54
chr24	5072495	5074064	MACS_peak_13251	58.01
chr24	5146238	5147802	MACS_peak_13254	179.25
chr24	5184087	5185943	MACS_peak_13255	105.09
chr24	8423486	8424441	MACS_peak_13291	60.21
chr24	8439637	8442217	MACS_peak_13292	86.03
chr24	9063254	9067258	MACS_peak_13304	296.23
chr24	13132882	13133995	MACS_peak_13355	89.07
chr24	13815325	13816498	MACS_peak_13360	62.21
chr24	13861050	13862378	MACS_peak_13363	92.86
chr24	13877661	13879623	MACS_peak_13364	164.49
chr24	13906384	13908442	MACS_peak_13366	151.7
chr24	17721139	17723642	MACS_peak_13403	107.04
chr24	17737401	17739473	MACS_peak_13404	75.59
chr24	20276310	20277595	MACS_peak_13440	51.02
chr24	20413165	20414405	MACS_peak_13447	82.44
chr24	21114600	21117457	MACS_peak_13461	116.57
chr24	21838753	21841577	MACS_peak_13479	280.27
chr24	21853221	21856549	MACS_peak_13480	102.1
chr24	21881738	21884300	MACS_peak_13482	95.8
chr24	21892731	21894980	MACS_peak_13483	141.38
chr24	21899183	21902762	MACS_peak_13484	114.05
chr24	21919857	21922691	MACS_peak_13485	178.28
chr24	22013531	22017863	MACS_peak_13488	72.09
chr24	23915232	23920060	MACS_peak_13513	102.06
chr24	24188978	24190157	MACS_peak_13516	58.86
chr24	24426211	24427676	MACS_peak_13523	59.78
chr24	24504876	24506497	MACS_peak_13526	68.56
chr24	24946644	24949271	MACS_peak_13533	159.56
chr24	29422695	29423699	MACS_peak_13608	68.54
chr24	29483209	29484231	MACS_peak_13609	73.32
chr24	29810605	29812981	MACS_peak_13614	76.65
chr24	36554118	36554769	MACS_peak_13675	64.99
chr24	36977086	36979126	MACS_peak_13682	113.31
chr24	37131228	37133010	MACS_peak_13690	150.08
chr24	37156834	37158395	MACS_peak_13691	155.38
chr25	439839	441742	MACS_peak_13815	109.87
chr25	445660	447235	MACS_peak_13816	149.73
chr25	471488	472124	MACS_peak_13819	51.67
chr25	14722443	14723621	MACS_peak_14010	89.92
chr25	15159245	15161269	MACS_peak_14020	64.17
chr25	15172869	15174072	MACS_peak_14021	97.28
chr25	15295164	15295817	MACS_peak_14022	56.11
chr25	17038841	17039729	MACS_peak_14039	71.73
chr25	17333880	17337100	MACS_peak_14046	180.25
chr25	17366400	17370952	MACS_peak_14048	262.84
chr25	17371935	17377539	MACS_peak_14049	110.58
chr25	17483328	17485400	MACS_peak_14052	80.26
chr25	20840259	20842033	MACS_peak_14118	102.48
chr25	27529283	27530314	MACS_peak_14202	78.42
chr25	29924203	29929466	MACS_peak_14232	72.09
chr25	30032882	30034343	MACS_peak_14235	126.59
chr25	31932020	31933632	MACS_peak_14256	116.89
chr25	37512408	37516951	MACS_peak_14367	84.77
chr3	5721655	5722873	MACS_peak_14428	185.8
chr3	12825430	12828604	MACS_peak_14534	294.28
chr3	17884598	17885833	MACS_peak_14637	78.62
chr3	18375640	18376706	MACS_peak_14649	78.35
chr3	25823572	25824659	MACS_peak_14793	84.36
chr3	30485033	30486261	MACS_peak_14877	64.34
chr3	31145136	31146521	MACS_peak_14886	116.2
chr3	33401511	33402759	MACS_peak_14961	64.14
chr3	38764877	38766872	MACS_peak_15059	204.4
chr3	40529736	40533602	MACS_peak_15102	150.62
chr3	45614595	45615886	MACS_peak_15176	62.94
chr3	46849314	46851102	MACS_peak_15191	106.81
chr3	50112467	50114852	MACS_peak_15234	99.62
chr3	53655372	53657873	MACS_peak_15268	242.91
chr3	53673458	53675703	MACS_peak_15269	176.7
chr3	53679618	53681802	MACS_peak_15270	405.98
chr3	54179021	54183072	MACS_peak_15283	69.81
chr3	54207509	54211231	MACS_peak_15285	109.95
chr3	54213852	54216840	MACS_peak_15286	131.13
chr3	54321633	54323376	MACS_peak_15291	96.48
chr3	55475919	55477678	MACS_peak_15304	118.4
chr3	55568415	55570629	MACS_peak_15311	202.51
chr3	56687016	56688855	MACS_peak_15340	121.3
chr3	58679535	58681077	MACS_peak_15362	74.06
chr3	63166617	63168354	MACS_peak_15455	83.71
chr4	5531611	5532828	MACS_peak_15563	118.32
chr4	6777964	6779390	MACS_peak_15581	116.74
chr4	9098158	9098901	MACS_peak_15637	58.17
chr4	16098551	16102917	MACS_peak_15800	106.54
chr4	16156420	16159268	MACS_peak_15803	189.78
chr4	16166647	16168482	MACS_peak_15804	158.98
chr4	16203870	16206096	MACS_peak_15805	154.2
chr4	16505892	16506887	MACS_peak_15811	75.04
chr4	18656011	18657162	MACS_peak_15846	67.55
chr4	18684478	18685651	MACS_peak_15847	62.15
chr4	19451020	19454552	MACS_peak_15865	172.87
chr4	20306563	20308692	MACS_peak_15873	92.41
chr4	21410469	21412688	MACS_peak_15893	230.23
chr5	324361	325503	MACS_peak_16108	60.47
chr5	1680288	1682632	MACS_peak_16126	238.37
chr5	6472956	6474013	MACS_peak_16182	104.27
chr5	6500177	6501793	MACS_peak_16183	165.87
chr5	16021345	16023591	MACS_peak_16288	126.19
chr5	17826486	17830347	MACS_peak_16319	81.8
chr5	19099871	19101064	MACS_peak_16339	61.66
chr5	19142105	19144102	MACS_peak_16342	81.08
chr5	19377034	19377939	MACS_peak_16343	59.53
chr5	26021965	26023864	MACS_peak_16468	80.35
chr5	26075935	26079216	MACS_peak_16470	85.45
chr5	26086236	26088401	MACS_peak_16471	71.12
chr5	26130516	26133019	MACS_peak_16474	62.04
chr5	29156061	29158184	MACS_peak_16522	166.3
chr5	31609175	31611552	MACS_peak_16560	133.52
chr5	34205608	34211644	MACS_peak_16617	147.84
chr5	40733513	40734920	MACS_peak_16755	181.52
chr5	41175047	41176686	MACS_peak_16760	57.25
chr5	41327132	41332200	MACS_peak_16765	136.77
chr5	43563106	43565363	MACS_peak_16804	143.38
chr5	43622393	43624403	MACS_peak_16806	75.86
chr5	43628658	43631199	MACS_peak_16807	266.96
chr5	45244206	45245168	MACS_peak_16838	79.89
chr5	46097026	46098367	MACS_peak_16865	218.43
chr5	46143934	46146328	MACS_peak_16868	106.87
chr5	51165450	51167940	MACS_peak_16920	64.17
chr5	51258251	51263573	MACS_peak_16922	134.59
chr5	51292400	51293444	MACS_peak_16924	75.59
chr5	51331880	51335265	MACS_peak_16926	69.24
chr5	51338784	51341966	MACS_peak_16927	60.58
chr5	51358795	51361550	MACS_peak_16928	51.18
chr5	51398496	51399331	MACS_peak_16931	69.83
chr5	51458506	51461475	MACS_peak_16935	69.81
chr5	51600507	51601715	MACS_peak_16939	82.61
chr5	51726055	51726777	MACS_peak_16941	55.34
chr5	51755459	51756866	MACS_peak_16943	195.88
chr5	51893396	51896806	MACS_peak_16944	116.41
chr5	52229641	52230961	MACS_peak_16951	104.23
chr5	52258043	52260564	MACS_peak_16953	125.3
chr5	56334385	56336746	MACS_peak_17003	99.7
chr5	60482351	60483171	MACS_peak_17061	77.13
chr5	61202643	61204960	MACS_peak_17076	157.75
chr5	62828685	62829846	MACS_peak_17088	54.99
chr5	68714467	68716151	MACS_peak_17177	89.78
chr5	68749230	68750606	MACS_peak_17178	99.42
chr5	69573206	69573892	MACS_peak_17202	74.28
chr6	6512728	6513676	MACS_peak_17390	52.85
chr6	8151338	8153525	MACS_peak_17429	166.17
chr6	14344327	14345338	MACS_peak_17542	165.58
chr6	14469513	14471095	MACS_peak_17545	88.02
chr6	14535280	14537271	MACS_peak_17546	113.8
chr6	14727682	14729558	MACS_peak_17550	98.75
chr6	14840834	14843471	MACS_peak_17552	149.07
chr6	18106156	18110944	MACS_peak_17589	275.51
chr6	21249300	21249969	MACS_peak_17630	54.69
chr6	28601360	28603153	MACS_peak_17724	94.67
chr6	28943995	28945899	MACS_peak_17736	120.27
chr6	30578587	30582094	MACS_peak_17762	201.37
chr6	36259728	36261100	MACS_peak_17834	68.68
chr6	36495012	36496398	MACS_peak_17841	97.66
chr6	43562819	43563641	MACS_peak_17970	50.99
chr6	43984324	43985727	MACS_peak_17980	88.14
chr6	44276292	44280717	MACS_peak_17988	82.9
chr6	49783986	49785221	MACS_peak_18058	94.33
chr6	54537104	54539247	MACS_peak_18144	58.99
chr6	54551636	54553806	MACS_peak_18145	176.29
chr6	54590521	54594207	MACS_peak_18147	188.35
chr7	6747757	6750166	MACS_peak_18246	76.17
chr7	16653621	16654561	MACS_peak_18347	55.44
chr7	16791724	16792756	MACS_peak_18349	91.43
chr7	20033289	20034605	MACS_peak_18390	50
chr7	20715934	20717146	MACS_peak_18410	52.99
chr7	22246822	22247392	MACS_peak_18446	57.84
chr7	22832409	22833807	MACS_peak_18454	84.13
chr7	28490804	28492978	MACS_peak_18596	73.29
chr7	28506808	28507838	MACS_peak_18597	52.26
chr7	29519361	29520247	MACS_peak_18611	57.28
chr7	29916831	29920851	MACS_peak_18615	162.12
chr7	32895810	32897980	MACS_peak_18684	51.03
chr7	32924924	32925718	MACS_peak_18686	54.13
chr7	34346338	34351237	MACS_peak_18708	252.34
chr7	35006392	35009223	MACS_peak_18723	107.31
chr7	35528975	35530395	MACS_peak_18747	92.92
chr7	35800232	35802880	MACS_peak_18756	78.49
chr7	35804641	35808397	MACS_peak_18757	50.38
chr7	36331125	36333843	MACS_peak_18780	176.46
chr7	37182921	37184462	MACS_peak_18795	163.44
chr7	37338923	37341041	MACS_peak_18801	65.73
chr7	37454049	37455376	MACS_peak_18805	67.79
chr7	37505825	37506815	MACS_peak_18807	57.75
chr7	37509042	37510126	MACS_peak_18808	66.05
chr7	37570124	37571958	MACS_peak_18811	85.56
chr7	38066476	38067508	MACS_peak_18822	79.15
chr7	38076435	38077568	MACS_peak_18823	81.15
chr7	38360534	38362243	MACS_peak_18828	83.92
chr7	38370669	38372756	MACS_peak_18829	160.11
chr7	38638174	38640316	MACS_peak_18832	91.08
chr7	38649210	38651894	MACS_peak_18833	127.87
chr7	38705247	38708100	MACS_peak_18835	176.28
chr7	38761031	38761972	MACS_peak_18836	51.61
chr7	39020049	39022541	MACS_peak_18843	97.84
chr7	39178645	39181921	MACS_peak_18848	172.54
chr7	41882743	41885063	MACS_peak_18904	172.81
chr7	45707368	45710569	MACS_peak_18958	354.45
chr7	47688237	47688861	MACS_peak_18978	56.54
chr7	48107498	48108583	MACS_peak_18986	90.07
chr7	50114506	50116784	MACS_peak_19011	128.03
chr7	51235712	51236408	MACS_peak_19026	65.08
chr7	52769334	52771604	MACS_peak_19051	107.22
chr7	53936252	53937822	MACS_peak_19074	116.19
chr7	53980944	53983851	MACS_peak_19076	123.39
chr7	54716112	54718643	MACS_peak_19101	123.09
chr7	55881642	55883993	MACS_peak_19119	171.03
chr7	55948079	55950123	MACS_peak_19122	133.12
chr7	56029948	56031465	MACS_peak_19128	165.28
chr7	62659727	62660944	MACS_peak_19216	131.62
chr7	64233456	64235934	MACS_peak_19226	92.27
chr7	67221718	67223808	MACS_peak_19279	329.27
chr7	70452659	70455709	MACS_peak_19307	78.88
chr7	70471105	70473465	MACS_peak_19308	179.8
chr7	70601179	70603191	MACS_peak_19316	71.17
chr7	70911302	70911919	MACS_peak_19317	62.57
chr8	3122676	3124075	MACS_peak_19420	85.77
chr8	5108832	5110146	MACS_peak_19449	70.42
chr8	17027170	17028516	MACS_peak_19608	104.57
chr8	19417966	19421757	MACS_peak_19656	164.14
chr8	20314691	20315648	MACS_peak_19678	51.69
chr8	20635594	20637558	MACS_peak_19687	127.8
chr8	24113344	24115082	MACS_peak_19745	116.93
chr8	30820850	30824652	MACS_peak_19883	175.73
chr8	34821789	34824152	MACS_peak_19942	299.81
chr8	39165681	39167458	MACS_peak_19976	83.79
chr8	45786362	45791973	MACS_peak_20054	70.07
chr8	45796644	45799836	MACS_peak_20055	130.92
chr8	45820847	45825215	MACS_peak_20056	53.3
chr8	45828043	45831320	MACS_peak_20057	102.59
chr8	50309796	50311030	MACS_peak_20114	65.07
chr9	8478393	8479816	MACS_peak_20335	105.5
chr9	16366673	16368012	MACS_peak_20475	109.79
chr9	31937694	31940045	MACS_peak_20707	144.49
chr9	31972603	31975169	MACS_peak_20708	154.53
chr9	31993485	31994879	MACS_peak_20709	68.18
chr9	32217054	32218591	MACS_peak_20714	82.21
chr9	32237618	32240139	MACS_peak_20715	125.03
chr9	32279121	32280538	MACS_peak_20716	99.82
chr9	35260516	35262234	MACS_peak_20771	75.29
chr9	35303107	35304466	MACS_peak_20775	87.83
chr9	38235900	38237918	MACS_peak_20809	91.61
chr9	38625230	38627800	MACS_peak_20815	201.07
chr9	40071352	40072654	MACS_peak_20840	71.94
chr9	42568456	42569537	MACS_peak_20869	138.3
chr9	47923890	47925382	MACS_peak_20943	57.24

## Sheet: medaka_OPARRs
chr1	298170	299323	MACS_peak_6	357.01
chr1	558558	561953	MACS_peak_24	154.02
chr1	1002944	1004134	MACS_peak_40	247.64
chr1	2082759	2083234	MACS_peak_73	56.81
chr1	2511313	2511790	MACS_peak_85	64.84
chr1	2513965	2514992	MACS_peak_87	146.14
chr1	2605781	2606558	MACS_peak_93	148.06
chr1	2672850	2673622	MACS_peak_97	101.99
chr1	4541498	4543468	MACS_peak_161	281.33
chr1	4669037	4670806	MACS_peak_169	289.23
chr1	4674924	4677166	MACS_peak_170	687.31
chr1	4798788	4799272	MACS_peak_175	73.29
chr1	4983792	4985181	MACS_peak_192	247.28
chr1	5600293	5601635	MACS_peak_214	232.28
chr1	6755532	6756397	MACS_peak_236	94.81
chr1	9634983	9636962	MACS_peak_244	1058.25
chr1	9708101	9708546	MACS_peak_246	55.17
chr1	9708615	9709127	MACS_peak_247	51.9
chr1	9786182	9786715	MACS_peak_251	66.05
chr1	10288729	10289257	MACS_peak_265	55.51
chr1	10396048	10396602	MACS_peak_272	57.7
chr1	10526277	10526959	MACS_peak_275	79.92
chr1	10570014	10572555	MACS_peak_278	210.86
chr1	10995421	10996536	MACS_peak_306	158.32
chr1	11316763	11317306	MACS_peak_317	59.09
chr1	11442298	11446130	MACS_peak_319	197.21
chr1	11576691	11580236	MACS_peak_328	213.81
chr1	11630483	11631691	MACS_peak_333	183.14
chr1	11882367	11885500	MACS_peak_346	603.2
chr1	12236953	12237696	MACS_peak_354	51.29
chr1	12250563	12251481	MACS_peak_356	119.27
chr1	12278181	12278971	MACS_peak_358	76.93
chr1	14261576	14262111	MACS_peak_368	57.93
chr1	14475074	14475671	MACS_peak_374	95.92
chr1	14545142	14546054	MACS_peak_378	311.75
chr1	14580387	14585510	MACS_peak_380	834.6
chr1	16240966	16242369	MACS_peak_416	91.36
chr1	16381296	16381839	MACS_peak_420	53.68
chr1	16655465	16657217	MACS_peak_431	318.55
chr1	17334428	17335434	MACS_peak_467	329.31
chr1	17381871	17384138	MACS_peak_470	132.85
chr1	17702215	17703594	MACS_peak_483	85.79
chr1	17840602	17841554	MACS_peak_495	172.91
chr1	17949367	17951391	MACS_peak_501	397.7
chr1	18050883	18052031	MACS_peak_503	89.71
chr1	18462346	18463493	MACS_peak_505	178.97
chr1	19566411	19568770	MACS_peak_524	597.7
chr1	19744647	19745318	MACS_peak_535	145.32
chr1	19878366	19880555	MACS_peak_540	350.46
chr1	19883741	19885579	MACS_peak_541	290.5
chr1	20032419	20034473	MACS_peak_549	496.42
chr1	20182333	20183794	MACS_peak_553	346.54
chr1	20188855	20189991	MACS_peak_554	161.63
chr1	20336807	20339094	MACS_peak_558	221.76
chr1	20375786	20376434	MACS_peak_560	347.8
chr1	20410700	20411977	MACS_peak_561	123.91
chr1	20868668	20869920	MACS_peak_570	158.63
chr1	21040957	21042267	MACS_peak_574	497.19
chr1	21131559	21132412	MACS_peak_580	55.91
chr1	21263673	21264397	MACS_peak_585	50.17
chr1	21463430	21464571	MACS_peak_589	230.26
chr1	21473481	21474115	MACS_peak_591	80.84
chr1	21516221	21516900	MACS_peak_594	63
chr1	22024712	22026428	MACS_peak_600	103.23
chr1	22058008	22058822	MACS_peak_603	65.99
chr1	22058917	22059593	MACS_peak_604	62.42
chr1	22103652	22106325	MACS_peak_606	328.92
chr1	22129674	22130852	MACS_peak_608	118.44
chr1	22163820	22165599	MACS_peak_612	236.5
chr1	22198740	22199587	MACS_peak_613	117.73
chr1	22207520	22208473	MACS_peak_614	180.16
chr1	22421209	22421850	MACS_peak_619	63.17
chr1	22498274	22499546	MACS_peak_621	94.42
chr1	22709292	22709979	MACS_peak_627	58.09
chr1	22887194	22888042	MACS_peak_631	98.43
chr1	22910997	22912412	MACS_peak_633	97.86
chr1	23300914	23304211	MACS_peak_642	313.12
chr1	23328232	23328910	MACS_peak_643	99.53
chr1	23375913	23376899	MACS_peak_646	141.64
chr1	23451325	23452330	MACS_peak_652	57.28
chr1	23715502	23715968	MACS_peak_665	52.38
chr1	24213238	24214511	MACS_peak_675	316.72
chr1	24617598	24618488	MACS_peak_685	126.91
chr1	24641982	24642738	MACS_peak_689	328.5
chr1	24737007	24737957	MACS_peak_692	79.42
chr1	25895085	25898200	MACS_peak_729	183.43
chr1	26306434	26307366	MACS_peak_736	102.68
chr1	26458270	26459201	MACS_peak_745	183.54
chr1	26491689	26493021	MACS_peak_748	323.01
chr1	26497839	26499783	MACS_peak_749	191.43
chr1	27615668	27616324	MACS_peak_778	83.53
chr1	27869010	27869833	MACS_peak_788	130.74
chr1	27961916	27962566	MACS_peak_792	68.39
chr1	28197902	28198721	MACS_peak_803	104.6
chr1	28875136	28876161	MACS_peak_827	147.8
chr1	30122749	30124211	MACS_peak_842	143.35
chr1	31178612	31179458	MACS_peak_859	160.35
chr1	31179739	31180437	MACS_peak_860	53.38
chr1	31714494	31714984	MACS_peak_888	60.48
chr1	31764897	31765854	MACS_peak_891	54.02
chr1	31967454	31970512	MACS_peak_904	260.79
chr1	31974849	31978228	MACS_peak_905	234.7
chr1	32001822	32003270	MACS_peak_908	159.98
chr1	32094993	32095948	MACS_peak_914	75.53
chr1	32138893	32140617	MACS_peak_916	178.81
chr1	32166456	32167800	MACS_peak_919	83.64
chr1	32188976	32189665	MACS_peak_922	57.67
chr1	32210444	32211052	MACS_peak_923	57.94
chr1	32233080	32236040	MACS_peak_925	397.85
chr1	32258944	32259628	MACS_peak_926	135.87
chr1	32326877	32328243	MACS_peak_927	134.89
chr1	32600170	32602917	MACS_peak_939	278.72
chr1	32609639	32610415	MACS_peak_940	53.84
chr1	32616709	32617619	MACS_peak_941	116.52
chr1	32621952	32622695	MACS_peak_942	88.66
chr1	32649756	32651853	MACS_peak_943	77.53
chr1	32689506	32690363	MACS_peak_948	127.02
chr1	32733897	32734785	MACS_peak_951	138.86
chr1	32915305	32917138	MACS_peak_952	161.98
chr1	33161054	33162625	MACS_peak_958	285.23
chr1	33177556	33178893	MACS_peak_959	120.37
chr1	33327450	33328803	MACS_peak_966	93.66
chr1	33475666	33477222	MACS_peak_976	308.05
chr1	34156320	34156891	MACS_peak_996	55.64
chr1	35582399	35583187	MACS_peak_1009	60.22
chr1	37698853	37700278	MACS_peak_1036	198.57
chr1	38089256	38089912	MACS_peak_1040	61.39
chr1	38458880	38460619	MACS_peak_1064	477.57
chr1	38485719	38487005	MACS_peak_1065	133.31
chr1	38627266	38628200	MACS_peak_1068	73.7
chr1	39351111	39352807	MACS_peak_1099	167.2
chr1	39472164	39472919	MACS_peak_1105	81.45
chr1	39639936	39640440	MACS_peak_1115	82.57
chr1	39827102	39827906	MACS_peak_1126	77.28
chr1	39901259	39902128	MACS_peak_1130	183.38
chr10	283771	285220	MACS_peak_1133	341.74
chr10	837148	838834	MACS_peak_1138	304.13
chr10	903829	904388	MACS_peak_1140	62.56
chr10	1098222	1099017	MACS_peak_1148	61.96
chr10	1156396	1156900	MACS_peak_1151	51.5
chr10	1163766	1166685	MACS_peak_1152	148.46
chr10	1584888	1585553	MACS_peak_1166	58.6
chr10	1951266	1952300	MACS_peak_1169	351.3
chr10	1957489	1958639	MACS_peak_1171	405.44
chr10	2084776	2085344	MACS_peak_1180	71.16
chr10	2427902	2428580	MACS_peak_1186	61.84
chr10	2648392	2649239	MACS_peak_1196	106.81
chr10	2667999	2672875	MACS_peak_1198	303.92
chr10	2692590	2693779	MACS_peak_1199	161.18
chr10	2765162	2765828	MACS_peak_1203	53.37
chr10	3472015	3472906	MACS_peak_1210	207.38
chr10	4057264	4057922	MACS_peak_1225	50.44
chr10	4078012	4079530	MACS_peak_1226	420.22
chr10	4183546	4185338	MACS_peak_1230	96.49
chr10	4251868	4252738	MACS_peak_1233	61.95
chr10	4397955	4400103	MACS_peak_1235	297.21
chr10	4403737	4404906	MACS_peak_1236	139.17
chr10	4413760	4414401	MACS_peak_1237	64.55
chr10	4422264	4423010	MACS_peak_1238	69.02
chr10	4445205	4446578	MACS_peak_1239	134.27
chr10	4525676	4526211	MACS_peak_1240	71.61
chr10	4552442	4555582	MACS_peak_1241	266.34
chr10	4621878	4622504	MACS_peak_1243	67.13
chr10	4645856	4648063	MACS_peak_1245	146.08
chr10	4651103	4652580	MACS_peak_1246	66.92
chr10	4655115	4656163	MACS_peak_1247	60.62
chr10	4667008	4668374	MACS_peak_1249	101.24
chr10	4676074	4677462	MACS_peak_1250	115.53
chr10	4682836	4685360	MACS_peak_1251	698.78
chr10	4706426	4707369	MACS_peak_1253	136.93
chr10	4775222	4776426	MACS_peak_1254	201.63
chr10	5264745	5265310	MACS_peak_1258	56.36
chr10	5421463	5422246	MACS_peak_1260	62.93
chr10	5427984	5428582	MACS_peak_1261	53.52
chr10	5543993	5544643	MACS_peak_1272	62.1
chr10	5612424	5612950	MACS_peak_1279	52.37
chr10	5656090	5657603	MACS_peak_1281	170.23
chr10	5676864	5678274	MACS_peak_1283	118.23
chr10	5710780	5712185	MACS_peak_1284	94.78
chr10	5737223	5738730	MACS_peak_1286	158.71
chr10	5870923	5871677	MACS_peak_1292	116.97
chr10	5877596	5878394	MACS_peak_1293	107.7
chr10	5978729	5979576	MACS_peak_1300	139.4
chr10	6428566	6429196	MACS_peak_1309	72.6
chr10	6681233	6683934	MACS_peak_1312	102.6
chr10	6693045	6694743	MACS_peak_1313	106.25
chr10	6699832	6700532	MACS_peak_1314	77.85
chr10	6718800	6720080	MACS_peak_1315	316.44
chr10	6749273	6750704	MACS_peak_1318	152.91
chr10	6777639	6779289	MACS_peak_1320	201.85
chr10	6796968	6799793	MACS_peak_1321	386.15
chr10	7026862	7028121	MACS_peak_1333	84.1
chr10	7058656	7060469	MACS_peak_1335	449.76
chr10	7146780	7147559	MACS_peak_1341	60.84
chr10	7152800	7153425	MACS_peak_1342	70.64
chr10	7238452	7239306	MACS_peak_1346	123.52
chr10	7250963	7252495	MACS_peak_1347	87.55
chr10	7263272	7264671	MACS_peak_1348	72.7
chr10	7289990	7292093	MACS_peak_1352	50.75
chr10	7299301	7300184	MACS_peak_1353	99.4
chr10	7389557	7390221	MACS_peak_1360	50.46
chr10	7474102	7475772	MACS_peak_1361	59.34
chr10	7486458	7487499	MACS_peak_1363	118.33
chr10	7554691	7556166	MACS_peak_1369	138.36
chr10	8267792	8269006	MACS_peak_1405	122.53
chr10	8799662	8801722	MACS_peak_1421	385.35
chr10	9187349	9187925	MACS_peak_1428	71.6
chr10	9815413	9816021	MACS_peak_1433	55.74
chr10	10145418	10146596	MACS_peak_1447	65.88
chr10	10280722	10281558	MACS_peak_1454	142.65
chr10	10859985	10860512	MACS_peak_1472	55.63
chr10	10908481	10911840	MACS_peak_1477	145.12
chr10	10935735	10938823	MACS_peak_1480	325.82
chr10	10946646	10952271	MACS_peak_1481	280.79
chr10	11414076	11416229	MACS_peak_1484	80.1
chr10	11438010	11439942	MACS_peak_1485	215.66
chr10	11440027	11440856	MACS_peak_1486	54.75
chr10	11749521	11750999	MACS_peak_1490	174.22
chr10	12013794	12015732	MACS_peak_1510	553.36
chr10	12211918	12212862	MACS_peak_1515	96.33
chr10	12697378	12697989	MACS_peak_1525	72.52
chr10	13030331	13030811	MACS_peak_1546	50.61
chr10	13065806	13067470	MACS_peak_1551	594.59
chr10	13071969	13072469	MACS_peak_1552	53.56
chr10	13239542	13241409	MACS_peak_1558	244.54
chr10	13260974	13261883	MACS_peak_1559	77.58
chr10	13431092	13432790	MACS_peak_1568	100.1
chr10	13433228	13434735	MACS_peak_1569	165.63
chr10	13491839	13492278	MACS_peak_1571	50.31
chr10	13826685	13827352	MACS_peak_1589	70.75
chr10	13914179	13914819	MACS_peak_1593	57.52
chr10	13938759	13941592	MACS_peak_1595	191.2
chr10	13995336	13995955	MACS_peak_1599	60.46
chr10	14364792	14365636	MACS_peak_1612	73.72
chr10	14484398	14485076	MACS_peak_1622	73.34
chr10	14580428	14582224	MACS_peak_1623	496
chr10	14901637	14902112	MACS_peak_1626	51.23
chr10	15177249	15178739	MACS_peak_1635	101.74
chr10	15207224	15207808	MACS_peak_1637	57.67
chr10	15548787	15549318	MACS_peak_1649	59.86
chr10	16040980	16043512	MACS_peak_1676	875.45
chr10	16172431	16173370	MACS_peak_1679	118.64
chr10	16682273	16683175	MACS_peak_1691	112.52
chr10	16777132	16777659	MACS_peak_1695	61.17
chr10	16854445	16856008	MACS_peak_1700	103.6
chr10	16861033	16861979	MACS_peak_1701	105.77
chr10	17005112	17006913	MACS_peak_1708	162.72
chr10	17056074	17056939	MACS_peak_1711	122.99
chr10	17938715	17941296	MACS_peak_1724	460.93
chr10	18159265	18160767	MACS_peak_1727	228.37
chr10	18309706	18311823	MACS_peak_1739	68.69
chr10	18416463	18417203	MACS_peak_1745	75.64
chr10	18751564	18752369	MACS_peak_1753	101.82
chr10	19540233	19540969	MACS_peak_1762	57.61
chr10	19541086	19541595	MACS_peak_1763	69.48
chr10	22286268	22287329	MACS_peak_1800	72.15
chr10	22324087	22324909	MACS_peak_1803	243.25
chr10	22915003	22916191	MACS_peak_1821	148.52
chr10	22934998	22936170	MACS_peak_1823	133.66
chr10	22940264	22942832	MACS_peak_1824	190.12
chr10	23078662	23079546	MACS_peak_1833	300
chr10	23106792	23109198	MACS_peak_1835	83.97
chr10	23111797	23112765	MACS_peak_1836	164.34
chr10	23112767	23113756	MACS_peak_1837	369.47
chr10	23133214	23134658	MACS_peak_1840	142.94
chr10	23138305	23138913	MACS_peak_1841	68.67
chr10	23142814	23144262	MACS_peak_1842	59.79
chr10	23144705	23145995	MACS_peak_1843	316.49
chr10	23167236	23168257	MACS_peak_1847	119.65
chr10	23174276	23175662	MACS_peak_1848	182.82
chr10	23310485	23311872	MACS_peak_1849	287.78
chr10	23427447	23428265	MACS_peak_1859	140.42
chr10	23463806	23465261	MACS_peak_1861	116.03
chr10	23474083	23474874	MACS_peak_1862	76.85
chr10	23567239	23567786	MACS_peak_1865	52.02
chr10	23590940	23591717	MACS_peak_1867	95.42
chr10	24406580	24407062	MACS_peak_1895	61.59
chr10	24576498	24578173	MACS_peak_1906	304.44
chr10	24736349	24737367	MACS_peak_1916	65.98
chr10	24870893	24872571	MACS_peak_1919	252.26
chr10	26276436	26277507	MACS_peak_1951	68.52
chr10	26398151	26399893	MACS_peak_1956	293.13
chr10	26579926	26581514	MACS_peak_1959	373.81
chr10	27511691	27512633	MACS_peak_1982	169.18
chr10	27533396	27535362	MACS_peak_1985	269.94
chr10	27568125	27572146	MACS_peak_1986	285.58
chr11	335174	336178	MACS_peak_1999	134.52
chr11	365689	367113	MACS_peak_2002	289.14
chr11	432454	432982	MACS_peak_2007	91.32
chr11	1544736	1545658	MACS_peak_2033	235.03
chr11	4044750	4046588	MACS_peak_2096	199.12
chr11	4339778	4340597	MACS_peak_2105	75.52
chr11	4599977	4601252	MACS_peak_2119	53.19
chr11	4713851	4715000	MACS_peak_2128	97.8
chr11	4907974	4908648	MACS_peak_2135	87.5
chr11	5146949	5148432	MACS_peak_2149	225.81
chr11	5759507	5760952	MACS_peak_2170	295.33
chr11	6167624	6169724	MACS_peak_2184	401.54
chr11	6218361	6218900	MACS_peak_2189	89.44
chr11	6403748	6404866	MACS_peak_2196	161.74
chr11	6406390	6407938	MACS_peak_2197	85.5
chr11	6543637	6544525	MACS_peak_2199	117.21
chr11	6721362	6722047	MACS_peak_2202	109.47
chr11	6741335	6742547	MACS_peak_2203	386.92
chr11	6754260	6756173	MACS_peak_2204	488.01
chr11	8176272	8176817	MACS_peak_2224	53.44
chr11	8401365	8401888	MACS_peak_2228	61.7
chr11	8437010	8437476	MACS_peak_2231	58.03
chr11	8793336	8793904	MACS_peak_2245	84.72
chr11	8851887	8853588	MACS_peak_2248	429.83
chr11	8894912	8895379	MACS_peak_2252	52.25
chr11	9008729	9009491	MACS_peak_2260	77.01
chr11	9043511	9044601	MACS_peak_2263	70.2
chr11	9056877	9058711	MACS_peak_2264	553.28
chr11	9403254	9404238	MACS_peak_2271	56.68
chr11	9445760	9447737	MACS_peak_2275	242.11
chr11	9461172	9462389	MACS_peak_2276	183.57
chr11	9753760	9755385	MACS_peak_2286	303.32
chr11	10322351	10324391	MACS_peak_2305	607.89
chr11	10332636	10334264	MACS_peak_2306	360.42
chr11	10350200	10357605	MACS_peak_2308	110.89
chr11	10548076	10550117	MACS_peak_2324	97.02
chr11	10896532	10897162	MACS_peak_2335	59.2
chr11	10909931	10910438	MACS_peak_2336	56.9
chr11	10938306	10939349	MACS_peak_2337	97.27
chr11	11035185	11036348	MACS_peak_2340	111.5
chr11	11875239	11876055	MACS_peak_2347	82.62
chr11	11889953	11890660	MACS_peak_2348	99.78
chr11	11957226	11960008	MACS_peak_2350	650.07
chr11	12150986	12151754	MACS_peak_2357	246.04
chr11	13312980	13314595	MACS_peak_2362	969.53
chr11	13495595	13498960	MACS_peak_2369	1039.62
chr11	13615123	13616467	MACS_peak_2374	149.32
chr11	13633721	13634634	MACS_peak_2376	187.05
chr11	13785535	13789725	MACS_peak_2387	594.22
chr11	13798717	13800454	MACS_peak_2388	83.55
chr11	14025878	14026394	MACS_peak_2402	57.92
chr11	14086630	14087329	MACS_peak_2406	66.82
chr11	14161050	14162530	MACS_peak_2408	238.27
chr11	14767034	14767708	MACS_peak_2413	60.24
chr11	15164931	15165454	MACS_peak_2425	56.13
chr11	15171001	15171459	MACS_peak_2426	84.04
chr11	15778248	15780035	MACS_peak_2446	165.24
chr11	15806703	15807278	MACS_peak_2448	70.84
chr11	16111932	16113243	MACS_peak_2453	228.44
chr11	16261038	16262001	MACS_peak_2460	85.85
chr11	16342603	16343176	MACS_peak_2464	190.19
chr11	16969448	16970818	MACS_peak_2500	153.58
chr11	16987225	16987923	MACS_peak_2501	61.74
chr11	16995422	16996559	MACS_peak_2502	272.81
chr11	17014021	17015991	MACS_peak_2503	600.42
chr11	17158970	17160868	MACS_peak_2511	373.48
chr11	17201031	17203331	MACS_peak_2515	423.56
chr11	17214511	17214990	MACS_peak_2516	56.27
chr11	17348138	17348966	MACS_peak_2522	256.48
chr11	17389416	17390695	MACS_peak_2528	162.68
chr11	17395530	17396474	MACS_peak_2529	230.1
chr11	17459604	17460907	MACS_peak_2531	111.12
chr11	17527188	17528332	MACS_peak_2535	332.78
chr11	17647784	17648620	MACS_peak_2550	304.86
chr11	17776568	17777625	MACS_peak_2559	156.19
chr11	18641122	18641940	MACS_peak_2581	60.43
chr11	18673811	18675378	MACS_peak_2585	352.39
chr11	19057352	19058294	MACS_peak_2611	50.24
chr11	19110314	19111648	MACS_peak_2612	190.92
chr11	19226503	19226960	MACS_peak_2622	50.99
chr11	19465588	19466582	MACS_peak_2635	122.62
chr11	19531622	19534051	MACS_peak_2639	1059.88
chr11	19675426	19677666	MACS_peak_2644	385.5
chr11	19902837	19903456	MACS_peak_2645	95.18
chr11	19925160	19926403	MACS_peak_2646	124.21
chr11	20070613	20071142	MACS_peak_2649	55.38
chr11	20290061	20291717	MACS_peak_2656	309.66
chr11	20541771	20543182	MACS_peak_2662	248.5
chr11	20561814	20563112	MACS_peak_2663	91.05
chr11	20565973	20566765	MACS_peak_2664	63.13
chr11	20577159	20578340	MACS_peak_2665	159.25
chr11	20632204	20633155	MACS_peak_2667	81.42
chr11	20782755	20783350	MACS_peak_2669	98.99
chr11	21302106	21302889	MACS_peak_2699	108.04
chr11	21387500	21388753	MACS_peak_2703	84.09
chr11	21427790	21429404	MACS_peak_2706	154.88
chr11	21528584	21529089	MACS_peak_2710	58.46
chr11	21733401	21734753	MACS_peak_2723	317.41
chr11	21875254	21877541	MACS_peak_2737	75.42
chr11	21986032	21988890	MACS_peak_2742	120.83
chr11	22119403	22120664	MACS_peak_2751	74.85
chr11	22124132	22124902	MACS_peak_2752	104.69
chr11	22169091	22169795	MACS_peak_2756	56.62
chr11	22215083	22215709	MACS_peak_2757	59.67
chr11	22271804	22273276	MACS_peak_2759	53.56
chr11	22442041	22443647	MACS_peak_2769	137.19
chr11	22576995	22577823	MACS_peak_2778	102.49
chr11	22634773	22635728	MACS_peak_2785	2596.34
chr11	22935218	22936420	MACS_peak_2804	62.99
chr11	22940760	22942190	MACS_peak_2805	225.44
chr11	22976409	22976981	MACS_peak_2807	66.44
chr11	23015945	23016495	MACS_peak_2809	52.85
chr11	23290937	23292374	MACS_peak_2821	56.6
chr11	23364722	23365789	MACS_peak_2823	176.03
chr11	23390361	23391302	MACS_peak_2825	180.28
chr11	23510100	23512379	MACS_peak_2833	111.94
chr11	23516316	23518551	MACS_peak_2834	386.88
chr11	26228531	26230075	MACS_peak_2879	441.32
chr11	26237430	26239679	MACS_peak_2880	273.15
chr11	26289332	26290727	MACS_peak_2883	748.75
chr11	26587958	26589584	MACS_peak_2887	264.35
chr11	26639777	26641754	MACS_peak_2890	245.36
chr11	26735230	26735758	MACS_peak_2897	55.51
chr11	27862027	27864467	MACS_peak_2898	133.19
chr11	28350811	28353146	MACS_peak_2919	423.93
chr11	28478298	28479069	MACS_peak_2922	79.42
chr11	28667827	28668643	MACS_peak_2929	99.41
chr11	28707785	28708393	MACS_peak_2931	67.3
chr11	29129927	29130695	MACS_peak_2943	86.34
chr11	29382344	29383144	MACS_peak_2952	82.14
chr12	1265652	1266231	MACS_peak_2993	103.51
chr12	1995974	1996340	MACS_peak_3023	54.77
chr12	2022270	2023083	MACS_peak_3025	60.05
chr12	2030127	2032368	MACS_peak_3026	188.44
chr12	2034423	2035479	MACS_peak_3027	93.05
chr12	2059062	2060404	MACS_peak_3029	108.21
chr12	2138679	2139263	MACS_peak_3033	64.86
chr12	2257309	2258056	MACS_peak_3037	77.53
chr12	2289858	2291963	MACS_peak_3040	293.66
chr12	2404270	2404953	MACS_peak_3045	386.05
chr12	2473051	2473689	MACS_peak_3048	51.85
chr12	2512890	2514055	MACS_peak_3054	150.36
chr12	2863692	2865123	MACS_peak_3062	132.07
chr12	2878776	2879863	MACS_peak_3064	292.63
chr12	2918141	2918939	MACS_peak_3070	201.49
chr12	2931721	2932487	MACS_peak_3072	250.46
chr12	3463174	3464285	MACS_peak_3105	94.11
chr12	3573939	3574501	MACS_peak_3109	63.83
chr12	3624335	3626062	MACS_peak_3111	307.3
chr12	3789340	3790477	MACS_peak_3118	107.54
chr12	4337084	4337995	MACS_peak_3120	179.46
chr12	4621115	4622136	MACS_peak_3130	400.36
chr12	4630307	4631104	MACS_peak_3131	101.41
chr12	4648155	4651556	MACS_peak_3132	402.81
chr12	4668749	4670056	MACS_peak_3134	65.07
chr12	4683944	4684693	MACS_peak_3136	62.56
chr12	4686310	4687026	MACS_peak_3137	64.37
chr12	4843355	4844715	MACS_peak_3145	168.66
chr12	5049519	5050576	MACS_peak_3162	69.58
chr12	5123255	5124673	MACS_peak_3168	74.69
chr12	5235445	5236927	MACS_peak_3179	234.13
chr12	5259856	5260714	MACS_peak_3183	50.33
chr12	5410456	5411119	MACS_peak_3187	82.27
chr12	6557924	6558884	MACS_peak_3211	84.26
chr12	6608325	6609803	MACS_peak_3215	60.89
chr12	6872518	6873095	MACS_peak_3225	57.7
chr12	7167966	7168656	MACS_peak_3234	51.02
chr12	7241768	7243677	MACS_peak_3239	154.16
chr12	7370308	7371022	MACS_peak_3248	56.42
chr12	7371051	7372747	MACS_peak_3249	81.48
chr12	7615605	7617550	MACS_peak_3259	522.27
chr12	7688147	7688837	MACS_peak_3261	84.53
chr12	7740305	7742035	MACS_peak_3263	135.33
chr12	7797140	7798577	MACS_peak_3266	243.03
chr12	8036855	8039687	MACS_peak_3279	259.92
chr12	8159789	8161271	MACS_peak_3282	318.28
chr12	8434799	8437112	MACS_peak_3304	571.53
chr12	8480938	8482342	MACS_peak_3308	157.43
chr12	8770638	8771390	MACS_peak_3317	286.75
chr12	8793998	8794738	MACS_peak_3318	66.89
chr12	8808159	8809460	MACS_peak_3319	91.64
chr12	8986951	8989343	MACS_peak_3320	312.78
chr12	9038702	9041982	MACS_peak_3325	84.22
chr12	9206795	9208084	MACS_peak_3334	214.43
chr12	9252636	9253827	MACS_peak_3335	89
chr12	9523751	9524325	MACS_peak_3338	55.29
chr12	9569708	9572269	MACS_peak_3341	222.47
chr12	9616773	9618047	MACS_peak_3346	80.91
chr12	9621575	9623348	MACS_peak_3347	577.45
chr12	10113194	10114889	MACS_peak_3362	118.42
chr12	10194744	10196281	MACS_peak_3369	164.01
chr12	10228857	10229458	MACS_peak_3371	73.89
chr12	10266496	10268509	MACS_peak_3374	338.03
chr12	10302447	10303342	MACS_peak_3376	68.92
chr12	10649059	10649820	MACS_peak_3382	119.93
chr12	10714857	10715563	MACS_peak_3383	124.79
chr12	10960320	10961477	MACS_peak_3386	262.23
chr12	11104459	11105741	MACS_peak_3388	137.51
chr12	11110081	11111141	MACS_peak_3389	93.83
chr12	11156671	11160046	MACS_peak_3390	798.81
chr12	11305428	11308090	MACS_peak_3398	158.31
chr12	11547560	11548957	MACS_peak_3406	167.82
chr12	11740351	11741031	MACS_peak_3422	90.17
chr12	11746173	11747485	MACS_peak_3423	65.23
chr12	11750567	11751546	MACS_peak_3424	54.45
chr12	11856940	11857435	MACS_peak_3433	54.19
chr12	11953754	11954442	MACS_peak_3440	90.39
chr12	12185585	12187554	MACS_peak_3453	330.82
chr12	12197123	12198027	MACS_peak_3454	93.86
chr12	12202201	12204044	MACS_peak_3455	76.13
chr12	12221494	12222456	MACS_peak_3458	54.2
chr12	12689472	12690588	MACS_peak_3477	106.84
chr12	12721660	12723761	MACS_peak_3480	106.28
chr12	12730438	12732656	MACS_peak_3481	171.62
chr12	12983382	12984074	MACS_peak_3494	67.07
chr12	13419218	13420101	MACS_peak_3517	146.06
chr12	13568925	13570464	MACS_peak_3520	105.55
chr12	13571778	13573059	MACS_peak_3521	120.93
chr12	13641606	13642343	MACS_peak_3525	63.05
chr12	13682064	13683008	MACS_peak_3527	171.01
chr12	13694473	13696636	MACS_peak_3528	651.57
chr12	13706132	13706900	MACS_peak_3529	90.71
chr12	13711026	13712104	MACS_peak_3530	83.11
chr12	13799522	13800010	MACS_peak_3531	63.05
chr12	14409681	14410714	MACS_peak_3555	159.59
chr12	14544387	14545297	MACS_peak_3559	91.07
chr12	14568516	14569658	MACS_peak_3561	171.3
chr12	15090278	15092301	MACS_peak_3578	263.13
chr12	15110008	15110738	MACS_peak_3580	154.32
chr12	15382455	15383252	MACS_peak_3584	149.99
chr12	15408184	15409326	MACS_peak_3588	245.39
chr12	15427467	15430250	MACS_peak_3590	379.86
chr12	15484283	15484956	MACS_peak_3595	64.98
chr12	15626356	15626837	MACS_peak_3605	56.01
chr12	15710426	15711131	MACS_peak_3606	100.08
chr12	15775376	15776154	MACS_peak_3609	98.59
chr12	15964401	15965646	MACS_peak_3618	143.55
chr12	15990922	15991549	MACS_peak_3619	54.4
chr12	16548716	16551161	MACS_peak_3629	293.99
chr12	17229920	17230435	MACS_peak_3637	68.6
chr12	17675858	17676349	MACS_peak_3644	52.45
chr12	18269492	18271883	MACS_peak_3666	130.66
chr12	18360239	18361808	MACS_peak_3676	866.7
chr12	20472372	20472894	MACS_peak_3705	67.6
chr12	21956482	21958452	MACS_peak_3715	500.04
chr12	22012489	22013518	MACS_peak_3717	91.96
chr12	22063843	22065139	MACS_peak_3721	285.63
chr12	22078982	22081418	MACS_peak_3723	77.67
chr12	22102449	22103928	MACS_peak_3725	288.06
chr12	22122265	22124347	MACS_peak_3726	397.71
chr12	22141655	22142643	MACS_peak_3728	67.87
chr12	22146646	22147364	MACS_peak_3729	57.87
chr12	22167508	22168239	MACS_peak_3730	67.02
chr12	22195187	22196157	MACS_peak_3731	87.95
chr12	23080712	23082101	MACS_peak_3740	171.73
chr12	23344944	23345497	MACS_peak_3749	52.5
chr12	24179013	24179474	MACS_peak_3777	58.73
chr12	24326965	24327483	MACS_peak_3785	51.36
chr12	24496305	24497141	MACS_peak_3792	72.76
chr12	24515521	24517557	MACS_peak_3794	164.83
chr12	25106413	25107049	MACS_peak_3810	58.51
chr12	25344999	25346288	MACS_peak_3817	78.56
chr12	26862706	26864573	MACS_peak_3841	234.21
chr12	27364449	27367365	MACS_peak_3854	573.05
chr12	27378180	27379260	MACS_peak_3856	315.37
chr12	27380045	27381484	MACS_peak_3857	58.91
chr12	27394186	27396497	MACS_peak_3858	280.49
chr12	27402284	27402785	MACS_peak_3859	112.93
chr12	27434548	27435187	MACS_peak_3863	86
chr12	28556816	28558205	MACS_peak_3872	398.21
chr12	28885035	28886958	MACS_peak_3882	143.45
chr12	29642824	29643465	MACS_peak_3913	68.57
chr12	29763387	29764707	MACS_peak_3914	149.22
chr13	1556880	1557951	MACS_peak_3960	73.73
chr13	1564971	1565563	MACS_peak_3962	69.41
chr13	2088556	2089198	MACS_peak_3979	97.7
chr13	2325694	2327342	MACS_peak_3987	595.26
chr13	2374633	2376263	MACS_peak_3990	297.52
chr13	2414511	2416969	MACS_peak_3993	62.65
chr13	2420493	2422168	MACS_peak_3994	92.13
chr13	2593433	2594139	MACS_peak_4005	99.93
chr13	3319423	3320063	MACS_peak_4035	52.98
chr13	3372447	3373431	MACS_peak_4040	368.6
chr13	3488477	3489329	MACS_peak_4045	462.36
chr13	3683006	3683503	MACS_peak_4054	53.94
chr13	3894607	3895205	MACS_peak_4063	2654.63
chr13	3936020	3936835	MACS_peak_4064	84.75
chr13	4190234	4190980	MACS_peak_4074	280.42
chr13	4307832	4308376	MACS_peak_4080	75.24
chr13	4328826	4329835	MACS_peak_4083	65.23
chr13	4337728	4338894	MACS_peak_4084	327.17
chr13	4354568	4356072	MACS_peak_4085	141.21
chr13	4363771	4365282	MACS_peak_4086	100.89
chr13	4368832	4371238	MACS_peak_4087	505.01
chr13	4386036	4387465	MACS_peak_4090	194.95
chr13	4391007	4394923	MACS_peak_4091	363.97
chr13	4402043	4403970	MACS_peak_4092	191.54
chr13	4420184	4421556	MACS_peak_4094	283.45
chr13	4525987	4526560	MACS_peak_4097	50.23
chr13	4833632	4835047	MACS_peak_4102	115.27
chr13	4865015	4865786	MACS_peak_4103	157.97
chr13	4877375	4878187	MACS_peak_4104	91.65
chr13	4981411	4983251	MACS_peak_4109	207.48
chr13	4994605	4995467	MACS_peak_4110	83
chr13	5686506	5687518	MACS_peak_4128	137.68
chr13	5695590	5697133	MACS_peak_4129	494.91
chr13	5700711	5702588	MACS_peak_4130	210.22
chr13	5728664	5729577	MACS_peak_4133	142.06
chr13	5760729	5762952	MACS_peak_4136	208.14
chr13	5878870	5880105	MACS_peak_4140	54.19
chr13	5891894	5893818	MACS_peak_4141	173.65
chr13	5901021	5902463	MACS_peak_4142	126.2
chr13	5951765	5953342	MACS_peak_4146	588.37
chr13	5972691	5974392	MACS_peak_4147	161.64
chr13	5989493	5990987	MACS_peak_4148	292.84
chr13	6144359	6145712	MACS_peak_4152	809.37
chr13	6151593	6153304	MACS_peak_4153	311.67
chr13	6157546	6158266	MACS_peak_4154	63.05
chr13	6320894	6322180	MACS_peak_4168	98.35
chr13	6496333	6498277	MACS_peak_4180	172.65
chr13	6510514	6511258	MACS_peak_4181	56.96
chr13	7070527	7071129	MACS_peak_4190	57.25
chr13	7094183	7095273	MACS_peak_4191	133.95
chr13	7127212	7128050	MACS_peak_4192	147.43
chr13	7212554	7214092	MACS_peak_4197	223.98
chr13	7363262	7364632	MACS_peak_4206	207.41
chr13	7414914	7416850	MACS_peak_4208	537.71
chr13	7546885	7548109	MACS_peak_4214	168.51
chr13	7573470	7574456	MACS_peak_4215	126.65
chr13	7583007	7584259	MACS_peak_4216	74.26
chr13	7637817	7639032	MACS_peak_4218	90.69
chr13	7686824	7687460	MACS_peak_4220	80.55
chr13	7694685	7695472	MACS_peak_4221	156.88
chr13	7870620	7871571	MACS_peak_4227	77.06
chr13	8234521	8235608	MACS_peak_4234	121.2
chr13	8405886	8407786	MACS_peak_4237	162.33
chr13	8415760	8418509	MACS_peak_4238	135.42
chr13	8420929	8422609	MACS_peak_4239	120.39
chr13	8459360	8459839	MACS_peak_4240	56.27
chr13	8548497	8549401	MACS_peak_4242	203.55
chr13	8614590	8615088	MACS_peak_4243	53.81
chr13	8670668	8672583	MACS_peak_4244	227.37
chr13	8706169	8707679	MACS_peak_4248	89.29
chr13	8730698	8732395	MACS_peak_4250	329.42
chr13	8961325	8961924	MACS_peak_4255	68.48
chr13	8994239	8994881	MACS_peak_4260	67.93
chr13	9021196	9022688	MACS_peak_4261	392.22
chr13	9029061	9033146	MACS_peak_4262	439.85
chr13	9036905	9040105	MACS_peak_4263	347.65
chr13	9053414	9055212	MACS_peak_4264	99.07
chr13	9241016	9242443	MACS_peak_4269	316.85
chr13	9256082	9256971	MACS_peak_4271	268.66
chr13	9261599	9262101	MACS_peak_4272	50.08
chr13	9344638	9346475	MACS_peak_4278	350.9
chr13	9463533	9465148	MACS_peak_4284	80.94
chr13	9489382	9489862	MACS_peak_4286	50.61
chr13	9498429	9499711	MACS_peak_4287	110.4
chr13	9555019	9556407	MACS_peak_4292	74.2
chr13	9557785	9559469	MACS_peak_4293	182.19
chr13	9715443	9715933	MACS_peak_4300	66.32
chr13	10123754	10124331	MACS_peak_4305	60.27
chr13	10146264	10146722	MACS_peak_4307	53.42
chr13	10298204	10298702	MACS_peak_4309	53.81
chr13	10331584	10332398	MACS_peak_4311	74.37
chr13	10760791	10766807	MACS_peak_4324	305.47
chr13	10927378	10928293	MACS_peak_4332	83.25
chr13	11405356	11406437	MACS_peak_4347	103.01
chr13	11540569	11541780	MACS_peak_4350	100.68
chr13	11637319	11639589	MACS_peak_4359	249.83
chr13	11655767	11657162	MACS_peak_4360	172.94
chr13	11812009	11813054	MACS_peak_4366	197.27
chr13	11916828	11917402	MACS_peak_4367	50.11
chr13	11943288	11943846	MACS_peak_4368	57.21
chr13	12510817	12511438	MACS_peak_4384	68.13
chr13	12763173	12767458	MACS_peak_4387	462.94
chr13	12886371	12887111	MACS_peak_4394	94.87
chr13	13284096	13285368	MACS_peak_4409	114.84
chr13	13483213	13483870	MACS_peak_4420	67.64
chr13	13487249	13487853	MACS_peak_4421	50.81
chr13	13678004	13678668	MACS_peak_4427	377.84
chr13	13805363	13806129	MACS_peak_4437	102.88
chr13	13811568	13812445	MACS_peak_4438	87.68
chr13	13834466	13835262	MACS_peak_4439	163.14
chr13	14065670	14067467	MACS_peak_4451	149.98
chr13	14131743	14133221	MACS_peak_4454	173.73
chr13	14151180	14153084	MACS_peak_4456	276.29
chr13	14174429	14176450	MACS_peak_4458	225.64
chr13	14183708	14186228	MACS_peak_4459	1294.14
chr13	14224811	14225534	MACS_peak_4460	70.88
chr13	14713983	14715243	MACS_peak_4475	368.26
chr13	14871508	14872948	MACS_peak_4478	233.2
chr13	15265300	15266411	MACS_peak_4485	139.83
chr13	15292634	15294640	MACS_peak_4486	593.92
chr13	15347583	15349402	MACS_peak_4489	100.19
chr13	15389402	15390899	MACS_peak_4493	447.41
chr13	15904628	15905396	MACS_peak_4501	106.74
chr13	15906611	15907525	MACS_peak_4502	110.55
chr13	15996187	15996977	MACS_peak_4506	57.63
chr13	16254806	16255554	MACS_peak_4522	79.59
chr13	17321543	17323640	MACS_peak_4546	296.1
chr13	17446263	17448351	MACS_peak_4555	300.18
chr13	17584691	17585746	MACS_peak_4564	235.27
chr13	17615389	17616991	MACS_peak_4566	135.22
chr13	17649015	17650726	MACS_peak_4570	307.85
chr13	17657271	17661209	MACS_peak_4572	338.56
chr13	17981938	17983603	MACS_peak_4584	210
chr13	18047211	18049245	MACS_peak_4587	140.99
chr13	18053770	18055414	MACS_peak_4588	117.39
chr13	18128538	18129794	MACS_peak_4597	121.76
chr13	18136248	18138317	MACS_peak_4598	288.41
chr13	18177991	18178499	MACS_peak_4601	53.09
chr13	18512866	18514419	MACS_peak_4617	199.56
chr13	18765717	18766236	MACS_peak_4621	51.24
chr13	19001379	19002387	MACS_peak_4626	80.91
chr13	19191133	19194017	MACS_peak_4637	281.54
chr13	19210748	19211855	MACS_peak_4640	134.26
chr13	19593785	19595392	MACS_peak_4650	282.27
chr13	19605186	19606676	MACS_peak_4651	206.02
chr13	19619931	19620915	MACS_peak_4652	93.02
chr13	19967092	19968430	MACS_peak_4662	558.12
chr13	20258758	20259634	MACS_peak_4674	55.66
chr13	20263170	20264536	MACS_peak_4675	171.52
chr13	20267437	20269223	MACS_peak_4676	544.51
chr13	20673686	20675313	MACS_peak_4682	140.92
chr13	20679388	20680935	MACS_peak_4683	270.17
chr13	21040496	21041666	MACS_peak_4698	194.41
chr13	21342995	21344226	MACS_peak_4711	313.62
chr13	21797242	21798458	MACS_peak_4725	113.76
chr13	21915381	21916618	MACS_peak_4730	89.26
chr13	21962749	21964491	MACS_peak_4734	78.56
chr13	21965270	21967600	MACS_peak_4735	112.57
chr13	22535646	22536505	MACS_peak_4749	104.59
chr13	22570630	22572872	MACS_peak_4751	197.19
chr13	22658759	22660025	MACS_peak_4755	60.88
chr13	22690205	22691354	MACS_peak_4757	57.18
chr13	23972012	23976896	MACS_peak_4764	343.46
chr13	24038497	24039077	MACS_peak_4765	75.23
chr13	24385531	24386503	MACS_peak_4782	116.13
chr13	24698840	24700362	MACS_peak_4789	199.21
chr13	25068936	25070011	MACS_peak_4799	165.81
chr13	25126545	25127112	MACS_peak_4803	61.53
chr13	25133846	25134966	MACS_peak_4804	84.99
chr13	25329575	25330540	MACS_peak_4814	137.96
chr13	25416826	25420010	MACS_peak_4817	232.08
chr13	25470995	25472646	MACS_peak_4821	107.8
chr13	25710079	25710619	MACS_peak_4823	54.04
chr13	25764843	25765476	MACS_peak_4825	75.21
chr13	25775219	25775822	MACS_peak_4826	55.75
chr13	25900558	25902490	MACS_peak_4827	307.29
chr13	26135702	26136655	MACS_peak_4832	99.96
chr13	26161405	26162020	MACS_peak_4835	60.9
chr13	26168005	26168592	MACS_peak_4836	120.48
chr13	26204131	26204670	MACS_peak_4838	54.16
chr13	26218121	26218670	MACS_peak_4839	81.56
chr13	26241695	26243894	MACS_peak_4840	155.09
chr13	26267337	26269660	MACS_peak_4841	228.22
chr13	26298744	26299427	MACS_peak_4843	63.46
chr13	26845403	26846313	MACS_peak_4856	226.11
chr13	27044967	27046306	MACS_peak_4862	415.38
chr13	27498766	27500186	MACS_peak_4875	358.37
chr13	27952828	27953564	MACS_peak_4882	53.71
chr13	29061635	29062676	MACS_peak_4911	139.29
chr13	29112272	29112802	MACS_peak_4913	66.47
chr13	29159147	29159998	MACS_peak_4914	105.76
chr13	29203598	29204287	MACS_peak_4916	84.67
chr13	29253374	29254624	MACS_peak_4918	338.39
chr13	29262893	29264132	MACS_peak_4919	160.29
chr13	29388765	29389776	MACS_peak_4920	121.4
chr13	29399704	29400407	MACS_peak_4921	125.68
chr13	29505229	29506076	MACS_peak_4924	124.06
chr13	29527951	29528888	MACS_peak_4927	104.37
chr13	29533709	29536345	MACS_peak_4928	177.01
chr13	29586151	29587308	MACS_peak_4931	76.5
chr13	29639836	29642578	MACS_peak_4933	73.92
chr13	29645281	29646790	MACS_peak_4934	152.2
chr13	29651801	29654075	MACS_peak_4935	85.39
chr13	29662802	29663673	MACS_peak_4937	55.19
chr13	29666720	29668142	MACS_peak_4938	193.03
chr13	29692101	29693652	MACS_peak_4941	85.67
chr13	29800473	29801778	MACS_peak_4943	348.38
chr13	29896742	29898549	MACS_peak_4944	141.16
chr13	29960926	29961632	MACS_peak_4945	67.23
chr13	30099690	30101585	MACS_peak_4952	252.5
chr13	30199828	30202703	MACS_peak_4959	444.84
chr13	30244993	30246437	MACS_peak_4961	305.44
chr13	30314686	30318008	MACS_peak_4963	359.8
chr13	30511976	30512545	MACS_peak_4970	66.84
chr13	30662753	30665297	MACS_peak_4978	662.64
chr13	31144957	31145873	MACS_peak_4993	76.34
chr13	31272151	31272888	MACS_peak_5000	106.07
chr13	31382586	31383171	MACS_peak_5007	134.86
chr13	31919079	31919557	MACS_peak_5028	61.4
chr13	32686451	32687226	MACS_peak_5039	89.98
chr13	32709989	32710768	MACS_peak_5041	64.18
chr14	533165	534790	MACS_peak_5066	120.14
chr14	605897	607242	MACS_peak_5072	195.56
chr14	672335	676939	MACS_peak_5075	615.19
chr14	794519	795375	MACS_peak_5080	85.04
chr14	1130710	1132185	MACS_peak_5090	170.11
chr14	1146272	1147573	MACS_peak_5091	66.55
chr14	1271868	1273234	MACS_peak_5099	112.37
chr14	1464806	1465242	MACS_peak_5106	381.28
chr14	2818441	2819215	MACS_peak_5146	68.56
chr14	3707379	3708127	MACS_peak_5157	87.98
chr14	3718905	3720441	MACS_peak_5158	133.16
chr14	3750769	3751667	MACS_peak_5160	63.99
chr14	5639147	5641126	MACS_peak_5179	267.59
chr14	5651827	5654410	MACS_peak_5180	317.89
chr14	5659496	5660566	MACS_peak_5181	132.49
chr14	5669050	5672001	MACS_peak_5182	343.12
chr14	5705440	5707303	MACS_peak_5186	112
chr14	5707769	5709969	MACS_peak_5187	163.84
chr14	5809314	5809795	MACS_peak_5194	71.04
chr14	7507059	7508150	MACS_peak_5204	89.17
chr14	7642885	7643615	MACS_peak_5205	63.25
chr14	7890054	7890820	MACS_peak_5218	81.64
chr14	7933322	7934115	MACS_peak_5220	62.57
chr14	8012048	8012908	MACS_peak_5223	112.72
chr14	8204746	8205227	MACS_peak_5234	61.73
chr14	8405527	8406802	MACS_peak_5242	165.07
chr14	8795194	8796708	MACS_peak_5264	97.45
chr14	9363095	9365048	MACS_peak_5276	177.22
chr14	9899572	9900194	MACS_peak_5282	87.09
chr14	9913986	9914595	MACS_peak_5283	57.87
chr14	10024196	10024641	MACS_peak_5290	61.02
chr14	10638446	10639234	MACS_peak_5307	82.72
chr14	10728658	10729334	MACS_peak_5313	50.81
chr14	10939654	10940992	MACS_peak_5317	116.71
chr14	10958703	10959444	MACS_peak_5318	93.88
chr14	10967051	10968614	MACS_peak_5320	237.19
chr14	11046970	11048510	MACS_peak_5328	74.96
chr14	11148009	11149288	MACS_peak_5330	118.97
chr14	12156309	12158348	MACS_peak_5346	311.48
chr14	12283238	12284633	MACS_peak_5349	200.83
chr14	12296858	12300311	MACS_peak_5352	389
chr14	12320815	12321790	MACS_peak_5353	83.64
chr14	12803413	12804073	MACS_peak_5372	107.3
chr14	12869942	12870738	MACS_peak_5376	92.8
chr14	13008003	13008586	MACS_peak_5380	127.21
chr14	13190756	13191893	MACS_peak_5389	113.58
chr14	13753027	13754084	MACS_peak_5407	93.76
chr14	13763688	13765066	MACS_peak_5408	202.36
chr14	13772105	13772929	MACS_peak_5409	108.56
chr14	13789794	13791633	MACS_peak_5411	204.26
chr14	13877269	13878282	MACS_peak_5415	175.48
chr14	13901274	13903297	MACS_peak_5417	448.65
chr14	13911809	13912523	MACS_peak_5418	92.76
chr14	13954288	13955416	MACS_peak_5421	407.01
chr14	14074094	14074584	MACS_peak_5425	60.48
chr14	14165938	14166997	MACS_peak_5429	78.05
chr14	14319563	14320218	MACS_peak_5436	75.44
chr14	14665136	14666908	MACS_peak_5446	157.46
chr14	14714535	14715935	MACS_peak_5450	154.12
chr14	14722391	14723468	MACS_peak_5451	61.4
chr14	14724769	14726205	MACS_peak_5452	58.13
chr14	14804415	14805165	MACS_peak_5454	65.84
chr14	15170105	15171931	MACS_peak_5469	239.83
chr14	15185096	15186462	MACS_peak_5472	99.16
chr14	15335707	15336520	MACS_peak_5481	73.34
chr14	15348764	15350678	MACS_peak_5482	226.43
chr14	15474827	15476804	MACS_peak_5490	142.09
chr14	15621678	15622402	MACS_peak_5494	50.93
chr14	15648154	15649203	MACS_peak_5496	69.55
chr14	16062204	16063023	MACS_peak_5508	78.69
chr14	16111614	16112378	MACS_peak_5511	62.5
chr14	16112506	16113556	MACS_peak_5512	168.74
chr14	16206176	16208195	MACS_peak_5517	328.34
chr14	16214754	16215794	MACS_peak_5518	110.2
chr14	16347136	16348554	MACS_peak_5526	104.87
chr14	16353610	16354403	MACS_peak_5527	84.76
chr14	16360493	16360918	MACS_peak_5528	82.85
chr14	16367529	16368677	MACS_peak_5529	227.69
chr14	16431174	16431656	MACS_peak_5534	56.4
chr14	16484864	16485585	MACS_peak_5538	103.69
chr14	16662249	16663388	MACS_peak_5545	771.38
chr14	16918690	16919869	MACS_peak_5556	67.39
chr14	16979567	16981474	MACS_peak_5562	428.92
chr14	17247629	17248988	MACS_peak_5573	277.2
chr14	17834582	17835272	MACS_peak_5591	114.99
chr14	17847053	17853238	MACS_peak_5592	281.94
chr14	17865640	17867580	MACS_peak_5594	234.24
chr14	17871203	17871811	MACS_peak_5595	61.84
chr14	18198936	18199532	MACS_peak_5599	134.3
chr14	18210981	18211737	MACS_peak_5600	100.86
chr14	18849034	18850096	MACS_peak_5611	261.97
chr14	19675290	19677629	MACS_peak_5619	583.82
chr14	20907172	20908279	MACS_peak_5652	112.99
chr14	20952712	20953984	MACS_peak_5654	168.5
chr14	21075388	21076765	MACS_peak_5660	220.9
chr14	21088631	21089108	MACS_peak_5661	72.84
chr14	21107811	21108660	MACS_peak_5664	67.49
chr14	21399668	21400131	MACS_peak_5683	52.77
chr14	21483711	21484301	MACS_peak_5688	57.29
chr14	21610209	21611298	MACS_peak_5694	87.02
chr14	21773850	21775426	MACS_peak_5701	203.81
chr14	21934533	21935622	MACS_peak_5708	55.63
chr14	21967747	21968475	MACS_peak_5709	108.73
chr14	22169147	22170728	MACS_peak_5713	198.1
chr14	22237336	22238392	MACS_peak_5716	210.16
chr14	22321515	22322021	MACS_peak_5719	50.01
chr14	22540444	22542299	MACS_peak_5734	477.84
chr14	22642712	22644388	MACS_peak_5740	236.87
chr14	22815640	22816476	MACS_peak_5747	94.6
chr14	23071171	23073023	MACS_peak_5757	186.28
chr14	23082930	23084738	MACS_peak_5758	308.7
chr14	23095439	23096773	MACS_peak_5759	235.91
chr14	23103715	23104816	MACS_peak_5760	167.53
chr14	23125024	23125964	MACS_peak_5761	230.99
chr14	23196194	23197506	MACS_peak_5763	84.9
chr14	23264376	23266000	MACS_peak_5768	227.3
chr14	23362761	23363472	MACS_peak_5775	55.46
chr14	23531110	23533469	MACS_peak_5784	238.71
chr14	23599237	23599873	MACS_peak_5785	65.64
chr14	23615650	23616312	MACS_peak_5786	54.93
chr14	23691811	23693317	MACS_peak_5791	419.79
chr14	24116001	24116778	MACS_peak_5807	86.73
chr14	24790709	24791326	MACS_peak_5824	77.43
chr14	24830167	24831726	MACS_peak_5826	285.62
chr14	28237774	28238552	MACS_peak_5840	179.87
chr14	28945879	28947397	MACS_peak_5880	280.65
chr14	29134887	29136672	MACS_peak_5890	140.83
chr14	29179061	29180870	MACS_peak_5894	75.65
chr14	29294571	29295663	MACS_peak_5895	53.22
chr14	29330355	29331895	MACS_peak_5898	100.6
chr14	29351863	29353952	MACS_peak_5901	1099.51
chr14	29571668	29572605	MACS_peak_5904	73.1
chr14	30598841	30599446	MACS_peak_5929	67.69
chr14	31350789	31351365	MACS_peak_5944	60.39
chr14	31677506	31678400	MACS_peak_5953	86.27
chr14	31787135	31787977	MACS_peak_5956	109.45
chr14	32305975	32308697	MACS_peak_5974	98.68
chr14	32321985	32323449	MACS_peak_5977	172.39
chr14	32584245	32585159	MACS_peak_5983	119.43
chr14	32629963	32630903	MACS_peak_5986	112.83
chr14	32641625	32642234	MACS_peak_5987	51.33
chr14	32793326	32794187	MACS_peak_5994	112.57
chr15	328613	329487	MACS_peak_6020	75.35
chr15	335466	336332	MACS_peak_6022	54.13
chr15	489913	491738	MACS_peak_6029	466.07
chr15	616670	618709	MACS_peak_6035	257.14
chr15	677889	680319	MACS_peak_6037	111.09
chr15	1523652	1524445	MACS_peak_6046	85.11
chr15	2161313	2162674	MACS_peak_6050	262.92
chr15	2181450	2182925	MACS_peak_6051	275.64
chr15	2810369	2811807	MACS_peak_6069	277.39
chr15	2820082	2820590	MACS_peak_6071	55.83
chr15	3242083	3243109	MACS_peak_6084	180.44
chr15	3259144	3261876	MACS_peak_6086	260.13
chr15	3683910	3684839	MACS_peak_6095	157.4
chr15	3726328	3727132	MACS_peak_6097	88.18
chr15	3900958	3902121	MACS_peak_6105	117.25
chr15	3921704	3922514	MACS_peak_6107	80.94
chr15	4185972	4187327	MACS_peak_6115	113.69
chr15	4190785	4193427	MACS_peak_6116	561.62
chr15	4668915	4670018	MACS_peak_6131	68.28
chr15	5812946	5813912	MACS_peak_6151	62.67
chr15	6043088	6044449	MACS_peak_6159	59.85
chr15	6046050	6048027	MACS_peak_6160	112.1
chr15	6053772	6055392	MACS_peak_6161	211.33
chr15	6138442	6139774	MACS_peak_6167	172.97
chr15	6193585	6195438	MACS_peak_6171	185.63
chr15	6348919	6355328	MACS_peak_6184	52.23
chr15	6638982	6639938	MACS_peak_6203	199.21
chr15	6681951	6683127	MACS_peak_6206	176.77
chr15	7020342	7021517	MACS_peak_6209	85.61
chr15	7271699	7273944	MACS_peak_6212	359.12
chr15	7421835	7422688	MACS_peak_6214	85.19
chr15	7433628	7434351	MACS_peak_6215	109.71
chr15	7638314	7639314	MACS_peak_6216	183.99
chr15	7667648	7670599	MACS_peak_6217	371.96
chr15	7680700	7681295	MACS_peak_6218	52.87
chr15	7752552	7754109	MACS_peak_6219	384.05
chr15	7800187	7801306	MACS_peak_6222	161.78
chr15	8864753	8866073	MACS_peak_6230	249.84
chr15	8871464	8872121	MACS_peak_6231	77.63
chr15	8904271	8905225	MACS_peak_6235	81.26
chr15	8994230	8995021	MACS_peak_6238	51.18
chr15	9785138	9785811	MACS_peak_6262	105.15
chr15	9933995	9934917	MACS_peak_6272	94.48
chr15	10017949	10018559	MACS_peak_6277	81.91
chr15	10123008	10123724	MACS_peak_6280	123.39
chr15	10308524	10310533	MACS_peak_6290	231.9
chr15	10360010	10361195	MACS_peak_6293	116.63
chr15	10417745	10419062	MACS_peak_6297	60.17
chr15	10484672	10486255	MACS_peak_6300	94.51
chr15	10493489	10495303	MACS_peak_6301	193.42
chr15	10515782	10517077	MACS_peak_6302	242.33
chr15	10554510	10555174	MACS_peak_6306	154.83
chr15	10599123	10600347	MACS_peak_6311	65.43
chr15	10605399	10608799	MACS_peak_6312	282.02
chr15	10637524	10638330	MACS_peak_6315	54.67
chr15	10667289	10667980	MACS_peak_6318	74.7
chr15	10712572	10713443	MACS_peak_6319	104.26
chr15	10747193	10748068	MACS_peak_6322	93.84
chr15	10762291	10764521	MACS_peak_6325	141.24
chr15	10834523	10835502	MACS_peak_6331	206.07
chr15	10928265	10929275	MACS_peak_6336	167.31
chr15	11116492	11118815	MACS_peak_6342	301.12
chr15	11188082	11189710	MACS_peak_6346	484.53
chr15	11244076	11244679	MACS_peak_6347	52.77
chr15	11308821	11310361	MACS_peak_6351	325.9
chr15	11440561	11441932	MACS_peak_6358	111.13
chr15	11479815	11480575	MACS_peak_6363	101.55
chr15	11581133	11582208	MACS_peak_6367	99.64
chr15	12982550	12983123	MACS_peak_6405	70.28
chr15	13164933	13165543	MACS_peak_6407	65.51
chr15	13478244	13479148	MACS_peak_6411	140.88
chr15	13494467	13495082	MACS_peak_6414	75.31
chr15	13536970	13538260	MACS_peak_6418	405.8
chr15	14298634	14299096	MACS_peak_6435	58.59
chr15	14623698	14624544	MACS_peak_6442	115.51
chr15	14944839	14945313	MACS_peak_6450	68.72
chr15	15396351	15397881	MACS_peak_6464	138.56
chr15	15421649	15422814	MACS_peak_6467	66.66
chr15	15512895	15513698	MACS_peak_6473	94.59
chr15	15531198	15532191	MACS_peak_6474	253.03
chr15	15537890	15538686	MACS_peak_6475	88.59
chr15	15635326	15637715	MACS_peak_6477	410.28
chr15	15921081	15921541	MACS_peak_6490	518.77
chr15	16090610	16091346	MACS_peak_6493	83.95
chr15	16159847	16161674	MACS_peak_6497	622.86
chr15	16180013	16180701	MACS_peak_6500	73.55
chr15	16242045	16244026	MACS_peak_6505	101.21
chr15	16245869	16247366	MACS_peak_6506	52.22
chr15	16282674	16283404	MACS_peak_6508	108.41
chr15	16589559	16591377	MACS_peak_6513	416.3
chr15	17285462	17286104	MACS_peak_6528	74
chr15	17576988	17578473	MACS_peak_6531	213.12
chr15	17759516	17760037	MACS_peak_6538	56.39
chr15	17930398	17931504	MACS_peak_6549	141.36
chr15	18009742	18010510	MACS_peak_6554	65.22
chr15	18216479	18217628	MACS_peak_6557	104.58
chr15	18275744	18276297	MACS_peak_6558	69.04
chr15	18395726	18396601	MACS_peak_6570	69.45
chr15	18504400	18505518	MACS_peak_6577	280.18
chr15	18528861	18529405	MACS_peak_6578	68.88
chr15	18751410	18752020	MACS_peak_6581	52.21
chr15	18820440	18821174	MACS_peak_6584	61.11
chr15	18840025	18841284	MACS_peak_6585	72.24
chr15	18858967	18860847	MACS_peak_6586	106.82
chr15	18893780	18895357	MACS_peak_6587	51.82
chr15	19268859	19270118	MACS_peak_6597	66.6
chr15	19300901	19301736	MACS_peak_6600	415.8
chr15	19315625	19317043	MACS_peak_6602	111.06
chr15	19318148	19319432	MACS_peak_6603	79.39
chr15	19347624	19348499	MACS_peak_6605	104.75
chr15	19369610	19371076	MACS_peak_6607	84.02
chr15	19402776	19404347	MACS_peak_6613	495.39
chr15	19474684	19476344	MACS_peak_6620	115.15
chr15	20188063	20189676	MACS_peak_6633	223.21
chr15	20227218	20230650	MACS_peak_6637	371.05
chr15	20259215	20260074	MACS_peak_6639	93.33
chr15	20271822	20273454	MACS_peak_6640	362.44
chr15	20316132	20318930	MACS_peak_6641	712.62
chr15	20344220	20345641	MACS_peak_6643	75.97
chr15	20351362	20352458	MACS_peak_6644	86.98
chr15	20363618	20365756	MACS_peak_6645	70.52
chr15	20461999	20463024	MACS_peak_6647	110.12
chr15	20464183	20465723	MACS_peak_6648	138.32
chr15	20489811	20490333	MACS_peak_6649	56.26
chr15	20510935	20512820	MACS_peak_6650	220.72
chr15	20724671	20725212	MACS_peak_6659	52.67
chr15	20731131	20732080	MACS_peak_6660	80.76
chr15	20769308	20770546	MACS_peak_6662	54.99
chr15	20808297	20810237	MACS_peak_6665	181.02
chr15	20828915	20829728	MACS_peak_6669	55.87
chr15	20954342	20955497	MACS_peak_6676	87.51
chr15	21024440	21025191	MACS_peak_6680	71.74
chr15	21067447	21067944	MACS_peak_6681	53.94
chr15	21067951	21068390	MACS_peak_6682	50.31
chr15	21068711	21069183	MACS_peak_6683	51.61
chr15	21102440	21104835	MACS_peak_6684	142.46
chr15	21124448	21125277	MACS_peak_6685	69.61
chr15	21127192	21128453	MACS_peak_6686	86.94
chr15	21190854	21191402	MACS_peak_6688	64.01
chr15	21285993	21287213	MACS_peak_6690	283.77
chr15	21394480	21395916	MACS_peak_6696	134.29
chr15	21547221	21549291	MACS_peak_6707	242.27
chr15	21606141	21606621	MACS_peak_6713	53.79
chr15	21997483	22001348	MACS_peak_6726	103.69
chr15	22047632	22048292	MACS_peak_6727	77.23
chr15	22103968	22104476	MACS_peak_6728	194.98
chr15	22320181	22322423	MACS_peak_6735	543.32
chr15	22329644	22331874	MACS_peak_6736	136.03
chr15	22332550	22334389	MACS_peak_6737	52.43
chr15	22355489	22356175	MACS_peak_6739	69.71
chr15	22701041	22702648	MACS_peak_6748	179.83
chr15	22728429	22729466	MACS_peak_6750	58.57
chr15	22782702	22783644	MACS_peak_6754	84.86
chr15	22845567	22846896	MACS_peak_6759	74.33
chr15	22881863	22882479	MACS_peak_6763	64.1
chr15	22970114	22971088	MACS_peak_6767	125.06
chr15	23025878	23027251	MACS_peak_6770	239.62
chr15	23141122	23142133	MACS_peak_6776	100.85
chr15	23190636	23191264	MACS_peak_6781	53.44
chr15	23211371	23212543	MACS_peak_6785	68.89
chr15	23391130	23392447	MACS_peak_6797	928.26
chr15	23626235	23626994	MACS_peak_6804	87.17
chr15	23707381	23709776	MACS_peak_6807	752.65
chr15	23718182	23721347	MACS_peak_6808	152.91
chr15	23726420	23727632	MACS_peak_6809	50.07
chr15	24524722	24525140	MACS_peak_6816	65.15
chr15	24562073	24562870	MACS_peak_6817	104.23
chr15	25176686	25178043	MACS_peak_6827	231.11
chr15	25471786	25472516	MACS_peak_6832	233.52
chr15	25485720	25487585	MACS_peak_6833	358.23
chr15	25505837	25506700	MACS_peak_6835	113.16
chr15	25672300	25674766	MACS_peak_6842	72.83
chr15	25684337	25686168	MACS_peak_6843	142.19
chr15	25728475	25729259	MACS_peak_6848	69.21
chr15	25821432	25822792	MACS_peak_6857	341.62
chr15	25848360	25849447	MACS_peak_6859	72.39
chr15	25896908	25897550	MACS_peak_6861	79.45
chr15	26071983	26073256	MACS_peak_6869	64.33
chr15	26085815	26088044	MACS_peak_6871	76.82
chr15	26190787	26191698	MACS_peak_6873	73.66
chr15	26199151	26200598	MACS_peak_6874	153.35
chr15	26250624	26252431	MACS_peak_6877	383.42
chr15	26322994	26323897	MACS_peak_6882	98.54
chr15	26752713	26753639	MACS_peak_6894	190.77
chr15	26813123	26814276	MACS_peak_6897	72.95
chr15	26829905	26830943	MACS_peak_6898	76.64
chr15	26831293	26832272	MACS_peak_6899	71.27
chr15	26897252	26899688	MACS_peak_6904	164.39
chr15	26993972	26996257	MACS_peak_6914	956.15
chr15	27000515	27002397	MACS_peak_6915	201.42
chr15	27015791	27016663	MACS_peak_6917	140.4
chr15	27056576	27057128	MACS_peak_6920	87.29
chr15	27159581	27160489	MACS_peak_6922	155.17
chr15	27161136	27162543	MACS_peak_6923	129.58
chr15	27193587	27195638	MACS_peak_6926	88.42
chr15	27215751	27216713	MACS_peak_6927	98.81
chr15	27227416	27230127	MACS_peak_6928	68.45
chr15	27260720	27262743	MACS_peak_6929	443.74
chr15	27293054	27293827	MACS_peak_6932	51.69
chr15	27314985	27315450	MACS_peak_6934	57.45
chr15	27327177	27330325	MACS_peak_6935	405.42
chr15	27433079	27434709	MACS_peak_6943	144.7
chr15	27476133	27476762	MACS_peak_6944	70.12
chr15	27575908	27578860	MACS_peak_6954	106.76
chr15	27642521	27645991	MACS_peak_6964	433.82
chr15	27652532	27654369	MACS_peak_6965	1208.21
chr15	27857257	27858290	MACS_peak_6973	169.74
chr15	27862798	27864762	MACS_peak_6974	396.93
chr15	28065093	28066879	MACS_peak_6988	114.8
chr15	28096315	28097232	MACS_peak_6993	120.81
chr15	28415125	28416500	MACS_peak_7004	91.77
chr15	28431600	28432260	MACS_peak_7006	60.93
chr15	28581006	28581710	MACS_peak_7018	125.5
chr15	28592145	28593605	MACS_peak_7019	207.11
chr15	28652360	28654078	MACS_peak_7024	80.19
chr15	28710679	28712565	MACS_peak_7029	61.27
chr15	28712659	28714101	MACS_peak_7030	61.75
chr15	28753337	28755012	MACS_peak_7035	357.18
chr15	28762954	28764050	MACS_peak_7036	144.19
chr15	29137599	29141243	MACS_peak_7049	141.11
chr15	29442367	29444235	MACS_peak_7062	194.11
chr15	29513136	29513809	MACS_peak_7067	52.07
chr15	29641094	29641973	MACS_peak_7072	99.87
chr15	29701303	29702406	MACS_peak_7074	218.35
chr15	29729659	29730986	MACS_peak_7075	103.16
chr15	29808858	29810682	MACS_peak_7076	134.9
chr15	29817092	29818342	MACS_peak_7077	79.19
chr15	29818727	29819452	MACS_peak_7078	120.64
chr15	29914226	29915410	MACS_peak_7084	134.09
chr16	273229	274018	MACS_peak_7090	93.76
chr16	540490	541976	MACS_peak_7100	179.43
chr16	612741	613240	MACS_peak_7102	65.02
chr16	617254	618340	MACS_peak_7103	132.73
chr16	639697	640752	MACS_peak_7104	62.05
chr16	673522	674772	MACS_peak_7107	59.01
chr16	686149	687572	MACS_peak_7108	136.37
chr16	745037	745513	MACS_peak_7111	51.11
chr16	750621	752149	MACS_peak_7112	427.18
chr16	757603	759400	MACS_peak_7113	212.22
chr16	969363	970158	MACS_peak_7118	91.46
chr16	1033853	1036695	MACS_peak_7121	390.24
chr16	1115500	1116295	MACS_peak_7123	67.77
chr16	1253460	1254120	MACS_peak_7128	82.96
chr16	1457662	1458901	MACS_peak_7133	177.47
chr16	1695808	1697501	MACS_peak_7147	440.01
chr16	1968619	1969731	MACS_peak_7162	60.81
chr16	2493503	2494071	MACS_peak_7177	56
chr16	2609257	2609940	MACS_peak_7182	74.19
chr16	2676047	2678425	MACS_peak_7186	178.49
chr16	2964580	2967722	MACS_peak_7191	91.74
chr16	3421247	3421885	MACS_peak_7204	62.24
chr16	3654887	3655560	MACS_peak_7215	69.99
chr16	3821324	3822192	MACS_peak_7222	77
chr16	3979019	3979773	MACS_peak_7228	89.42
chr16	4344501	4346748	MACS_peak_7233	452.99
chr16	4480507	4480990	MACS_peak_7235	56.38
chr16	4489974	4490886	MACS_peak_7237	82.9
chr16	4854176	4855123	MACS_peak_7242	193.65
chr16	6083405	6085415	MACS_peak_7276	96.04
chr16	6239205	6239861	MACS_peak_7283	61.39
chr16	6267272	6268237	MACS_peak_7286	255.9
chr16	6306567	6307054	MACS_peak_7289	79.06
chr16	7749620	7750128	MACS_peak_7316	63.75
chr16	8469847	8471078	MACS_peak_7338	76.29
chr16	8474833	8476859	MACS_peak_7339	932.67
chr16	8740850	8741620	MACS_peak_7346	108.28
chr16	8758754	8759719	MACS_peak_7347	300.7
chr16	8774789	8775347	MACS_peak_7348	92.46
chr16	8781866	8782718	MACS_peak_7349	133.4
chr16	8848391	8850531	MACS_peak_7353	76.98
chr16	8863910	8864699	MACS_peak_7354	99.53
chr16	8911118	8915205	MACS_peak_7356	312.83
chr16	8923291	8926041	MACS_peak_7357	398.4
chr16	8943196	8945648	MACS_peak_7358	173.01
chr16	9066530	9068054	MACS_peak_7360	169.34
chr16	9076180	9078476	MACS_peak_7361	294.48
chr16	9093187	9095021	MACS_peak_7363	179.56
chr16	9101167	9102477	MACS_peak_7364	88.15
chr16	9147034	9149279	MACS_peak_7366	153.55
chr16	9646387	9647324	MACS_peak_7380	78.36
chr16	9678821	9680719	MACS_peak_7381	356.2
chr16	10193322	10194693	MACS_peak_7398	254.55
chr16	10474212	10475290	MACS_peak_7399	116.81
chr16	10879402	10880049	MACS_peak_7414	65.18
chr16	10903174	10904761	MACS_peak_7417	352.58
chr16	11679374	11679962	MACS_peak_7457	58.92
chr16	11694866	11695975	MACS_peak_7458	134.5
chr16	11738146	11739210	MACS_peak_7461	84.89
chr16	12142025	12143985	MACS_peak_7469	94.94
chr16	12218491	12220391	MACS_peak_7475	378.98
chr16	12267147	12271252	MACS_peak_7479	199.38
chr16	12277736	12281057	MACS_peak_7481	361.13
chr16	12288069	12289592	MACS_peak_7482	142.89
chr16	12302863	12304751	MACS_peak_7483	284.28
chr16	12444222	12444843	MACS_peak_7490	111.18
chr16	12503912	12504479	MACS_peak_7495	92.97
chr16	12513698	12514610	MACS_peak_7496	102.08
chr16	12692336	12693784	MACS_peak_7502	382.45
chr16	12734498	12735300	MACS_peak_7504	75.28
chr16	12771263	12771907	MACS_peak_7505	57.66
chr16	12860668	12861958	MACS_peak_7513	103.18
chr16	12870178	12871910	MACS_peak_7514	123.47
chr16	12884209	12884793	MACS_peak_7515	87.46
chr16	12940300	12941706	MACS_peak_7519	282.18
chr16	13032588	13034043	MACS_peak_7527	65.18
chr16	13091176	13091820	MACS_peak_7531	50.5
chr16	13141808	13144397	MACS_peak_7536	51.78
chr16	13146387	13148846	MACS_peak_7537	211.21
chr16	13382261	13386843	MACS_peak_7553	128.61
chr16	13390271	13393384	MACS_peak_7554	153.75
chr16	13397581	13401015	MACS_peak_7555	141.94
chr16	13617995	13619017	MACS_peak_7561	58.96
chr16	13637730	13638529	MACS_peak_7563	60.89
chr16	13638744	13639790	MACS_peak_7564	98.93
chr16	13651261	13652968	MACS_peak_7565	398.33
chr16	13791327	13793450	MACS_peak_7574	326.94
chr16	14052977	14054309	MACS_peak_7582	88.16
chr16	14068190	14069274	MACS_peak_7583	382.31
chr16	14800469	14801308	MACS_peak_7621	56.66
chr16	14805725	14806321	MACS_peak_7622	62.59
chr16	15202775	15203379	MACS_peak_7642	73.47
chr16	15252292	15253959	MACS_peak_7646	337.18
chr16	15287237	15288843	MACS_peak_7650	244.19
chr16	15299132	15301023	MACS_peak_7652	80.61
chr16	15474506	15475507	MACS_peak_7664	69.59
chr16	15524639	15525927	MACS_peak_7666	133.85
chr16	15955968	15957435	MACS_peak_7689	61.82
chr16	15960278	15961730	MACS_peak_7690	126.02
chr16	15969556	15970730	MACS_peak_7691	70.02
chr16	16419888	16421121	MACS_peak_7715	274.64
chr16	16615121	16615819	MACS_peak_7725	61.74
chr16	16708992	16710059	MACS_peak_7726	141.36
chr16	16956019	16957331	MACS_peak_7740	207.01
chr16	17017264	17018507	MACS_peak_7744	213.35
chr16	17105091	17105841	MACS_peak_7747	80.91
chr16	17379599	17380171	MACS_peak_7764	60.89
chr16	17730334	17732201	MACS_peak_7789	229.15
chr16	17792039	17793540	MACS_peak_7792	156.27
chr16	17878142	17878750	MACS_peak_7795	72.92
chr16	17916226	17916974	MACS_peak_7797	159.18
chr16	18048675	18049868	MACS_peak_7805	156.42
chr16	18625730	18626507	MACS_peak_7817	70.98
chr16	18678482	18679637	MACS_peak_7820	633.47
chr16	19402193	19404178	MACS_peak_7839	93.24
chr16	19450195	19452191	MACS_peak_7841	119.77
chr16	19552002	19552738	MACS_peak_7844	59.82
chr16	19780032	19782498	MACS_peak_7858	482.65
chr16	19819283	19819997	MACS_peak_7862	55.02
chr16	19906918	19909328	MACS_peak_7866	483.65
chr16	19920772	19921873	MACS_peak_7867	51.46
chr16	19926290	19927896	MACS_peak_7868	112.24
chr16	20672293	20673377	MACS_peak_7884	71.16
chr16	20681701	20683119	MACS_peak_7886	147.86
chr16	20733074	20736089	MACS_peak_7890	170.02
chr16	21073108	21075422	MACS_peak_7908	126.04
chr16	21087035	21089057	MACS_peak_7910	143.44
chr16	21095508	21097668	MACS_peak_7911	210.26
chr16	21130967	21133051	MACS_peak_7912	279.35
chr16	21216843	21218429	MACS_peak_7915	184.09
chr16	21241060	21242586	MACS_peak_7916	217.18
chr16	21800906	21801920	MACS_peak_7931	173.86
chr16	21808151	21808860	MACS_peak_7932	80.11
chr16	21908072	21909809	MACS_peak_7942	265.69
chr16	22958196	22958946	MACS_peak_7954	72.51
chr16	23478564	23479435	MACS_peak_7973	54.74
chr16	23712312	23713328	MACS_peak_7984	136.43
chr16	23729654	23732177	MACS_peak_7986	957.69
chr16	23752083	23753515	MACS_peak_7987	306.04
chr16	23773015	23774860	MACS_peak_7990	287.86
chr16	23778074	23780004	MACS_peak_7991	75.44
chr16	24212896	24213590	MACS_peak_7999	98.77
chr16	24538642	24540156	MACS_peak_8007	390.95
chr16	24647164	24648101	MACS_peak_8018	96.67
chr16	24899185	24901823	MACS_peak_8024	211.32
chr16	24984612	24986004	MACS_peak_8028	135.55
chr16	25233321	25233936	MACS_peak_8037	86.06
chr16	25323546	25324944	MACS_peak_8042	194.85
chr16	25482989	25483695	MACS_peak_8048	59
chr16	25618355	25619120	MACS_peak_8054	80.18
chr16	26120353	26121075	MACS_peak_8061	80.82
chr16	26207055	26207653	MACS_peak_8068	57.72
chr16	26568818	26570029	MACS_peak_8084	154.99
chr16	26902814	26905523	MACS_peak_8092	437.81
chr16	26908813	26910961	MACS_peak_8093	83.04
chr16	26920344	26921917	MACS_peak_8096	511.85
chr16	26928891	26930200	MACS_peak_8098	172.85
chr16	27161313	27162028	MACS_peak_8104	66.35
chr16	27248243	27249141	MACS_peak_8109	99.27
chr16	27833604	27834160	MACS_peak_8123	62.95
chr16	27868927	27869716	MACS_peak_8124	111.42
chr16	27878186	27878730	MACS_peak_8125	70.31
chr16	27899901	27902322	MACS_peak_8126	407.89
chr16	28132895	28134008	MACS_peak_8132	126.51
chr16	28304508	28305993	MACS_peak_8141	347.32
chr16	28566799	28568174	MACS_peak_8148	516.02
chr16	28607495	28608344	MACS_peak_8153	75.37
chr16	28685758	28686370	MACS_peak_8160	76.44
chr16	28883456	28884448	MACS_peak_8164	62.14
chr16	28921309	28922187	MACS_peak_8167	125.74
chr17	39864	41176	MACS_peak_8200	161.14
chr17	281645	282357	MACS_peak_8208	105.1
chr17	293136	294647	MACS_peak_8209	118.31
chr17	828203	828709	MACS_peak_8220	51.36
chr17	1039153	1040848	MACS_peak_8224	328.31
chr17	1041724	1042877	MACS_peak_8225	99.37
chr17	1145018	1145488	MACS_peak_8229	51.86
chr17	1610145	1610776	MACS_peak_8233	59.54
chr17	2419213	2421109	MACS_peak_8245	262.77
chr17	2473628	2474482	MACS_peak_8246	90.72
chr17	2546080	2548242	MACS_peak_8248	156.55
chr17	2551519	2553111	MACS_peak_8249	90.67
chr17	2557541	2558338	MACS_peak_8250	58.21
chr17	2571898	2572863	MACS_peak_8252	110.85
chr17	3022690	3026627	MACS_peak_8267	204.38
chr17	3341212	3342233	MACS_peak_8283	91.67
chr17	3404830	3406159	MACS_peak_8285	461.3
chr17	4392195	4393466	MACS_peak_8314	148.03
chr17	4505978	4507647	MACS_peak_8320	301.93
chr17	4721222	4721782	MACS_peak_8327	133.01
chr17	4874814	4876237	MACS_peak_8338	743.58
chr17	4885145	4886697	MACS_peak_8340	100.89
chr17	5541144	5542133	MACS_peak_8365	83.17
chr17	5995329	5995972	MACS_peak_8392	89.06
chr17	6427085	6427954	MACS_peak_8405	142.04
chr17	6439279	6440594	MACS_peak_8406	151.45
chr17	6849322	6849937	MACS_peak_8416	109.24
chr17	6882587	6883145	MACS_peak_8420	74.17
chr17	7388275	7388930	MACS_peak_8427	56.37
chr17	7668246	7669858	MACS_peak_8438	301.58
chr17	8477478	8478501	MACS_peak_8452	145
chr17	8877700	8878317	MACS_peak_8464	63.34
chr17	9192654	9194887	MACS_peak_8474	188.13
chr17	10553847	10555045	MACS_peak_8498	138.95
chr17	11645383	11646529	MACS_peak_8536	65.45
chr17	11670253	11671662	MACS_peak_8537	310.88
chr17	12619494	12621662	MACS_peak_8551	333.17
chr17	12832936	12833885	MACS_peak_8567	63.03
chr17	14146631	14147418	MACS_peak_8609	117.5
chr17	14300232	14301669	MACS_peak_8613	161.9
chr17	14357546	14358689	MACS_peak_8618	142.01
chr17	14508979	14510131	MACS_peak_8627	130.76
chr17	14805071	14807509	MACS_peak_8637	348.74
chr17	14924884	14926908	MACS_peak_8641	103.29
chr17	15460681	15461800	MACS_peak_8660	71.35
chr17	15924034	15924308	MACS_peak_8673	76.34
chr17	16165837	16167520	MACS_peak_8682	305.71
chr17	16268870	16269426	MACS_peak_8686	74.46
chr17	16303593	16306130	MACS_peak_8688	249.51
chr17	16311269	16313484	MACS_peak_8689	136.77
chr17	16507452	16508001	MACS_peak_8693	68.73
chr17	17566413	17567493	MACS_peak_8744	122.14
chr17	17682215	17684617	MACS_peak_8751	174.03
chr17	17685759	17687866	MACS_peak_8752	156.39
chr17	17959757	17961162	MACS_peak_8765	481.52
chr17	18216401	18216981	MACS_peak_8774	76.88
chr17	18278113	18279266	MACS_peak_8775	83.95
chr17	18847745	18848540	MACS_peak_8783	110.5
chr17	18916200	18917385	MACS_peak_8788	226.88
chr17	19060776	19061516	MACS_peak_8790	145.52
chr17	19138645	19140760	MACS_peak_8793	155.29
chr17	19159729	19160682	MACS_peak_8795	152.19
chr17	19173857	19174977	MACS_peak_8797	93.67
chr17	19199964	19201068	MACS_peak_8798	116.27
chr17	19332348	19332960	MACS_peak_8800	66.78
chr17	19462530	19465147	MACS_peak_8804	235.18
chr17	20149363	20150986	MACS_peak_8818	225.95
chr17	21190427	21190856	MACS_peak_8822	57.42
chr17	21364943	21366027	MACS_peak_8830	139.04
chr17	21530349	21532330	MACS_peak_8846	357.63
chr17	21541648	21542415	MACS_peak_8847	189.21
chr17	22040190	22040691	MACS_peak_8870	57.37
chr17	22191557	22192504	MACS_peak_8882	187.26
chr17	22199818	22201367	MACS_peak_8883	344.8
chr17	22384586	22385199	MACS_peak_8884	53.41
chr17	22422349	22424394	MACS_peak_8885	174.18
chr17	22428061	22429054	MACS_peak_8886	78.14
chr17	22450665	22451679	MACS_peak_8889	54.27
chr17	22453166	22454406	MACS_peak_8890	202.7
chr17	22474695	22477443	MACS_peak_8892	924.17
chr17	22539773	22542990	MACS_peak_8895	113.24
chr17	22993338	22994611	MACS_peak_8914	205.21
chr17	23081711	23083151	MACS_peak_8921	356.38
chr17	23161817	23162307	MACS_peak_8926	54.83
chr17	23623940	23624514	MACS_peak_8947	62.93
chr17	23632431	23635117	MACS_peak_8948	842.25
chr17	23663697	23665763	MACS_peak_8951	71.17
chr17	23682484	23684189	MACS_peak_8954	378.74
chr17	23742297	23743725	MACS_peak_8959	228.42
chr17	23774099	23774853	MACS_peak_8961	77.01
chr17	23858443	23861371	MACS_peak_8963	1013.1
chr17	24015799	24016861	MACS_peak_8973	164.52
chr17	24088120	24091383	MACS_peak_8978	102.95
chr17	24100819	24102277	MACS_peak_8980	113.82
chr17	24437585	24439644	MACS_peak_8984	206.51
chr17	24563464	24564220	MACS_peak_8990	92.6
chr17	24977792	24978940	MACS_peak_9009	65.39
chr17	24993250	24995453	MACS_peak_9011	146.54
chr17	25074627	25077631	MACS_peak_9018	223.24
chr17	25086936	25088524	MACS_peak_9020	124.8
chr17	25415317	25415879	MACS_peak_9028	60.38
chr17	25746978	25748651	MACS_peak_9040	757.95
chr17	25808646	25809564	MACS_peak_9043	107.47
chr17	25835888	25837369	MACS_peak_9045	128.78
chr17	25871696	25873413	MACS_peak_9046	647.92
chr17	26215997	26218447	MACS_peak_9062	464.44
chr17	26284602	26285396	MACS_peak_9065	122.95
chr17	26380080	26381185	MACS_peak_9073	59.05
chr17	26397565	26399001	MACS_peak_9075	52.39
chr17	26401688	26403240	MACS_peak_9076	329.87
chr17	26411372	26413701	MACS_peak_9077	284.95
chr17	26501627	26502998	MACS_peak_9085	283.32
chr17	26936117	26936875	MACS_peak_9101	86.63
chr17	26961632	26963934	MACS_peak_9103	117.54
chr17	27333258	27334396	MACS_peak_9116	111.18
chr17	27488405	27490018	MACS_peak_9119	119.18
chr17	27490088	27490998	MACS_peak_9120	61.11
chr17	27735618	27738714	MACS_peak_9130	481.96
chr17	27752735	27754715	MACS_peak_9132	69.01
chr17	27984504	27986072	MACS_peak_9147	156.14
chr17	28080231	28082346	MACS_peak_9156	57.79
chr17	28114836	28116281	MACS_peak_9159	94.21
chr17	28135192	28137394	MACS_peak_9161	184.81
chr17	28142085	28143031	MACS_peak_9162	109.3
chr17	28165626	28166429	MACS_peak_9163	50.1
chr17	28430695	28431861	MACS_peak_9172	50.87
chr17	28462853	28463374	MACS_peak_9173	67.74
chr17	28481121	28482193	MACS_peak_9174	182.49
chr17	28505951	28509352	MACS_peak_9175	394.41
chr17	28553257	28555307	MACS_peak_9177	499.5
chr17	28803280	28804923	MACS_peak_9183	171.63
chr17	28815924	28818416	MACS_peak_9185	244.52
chr17	28909896	28911288	MACS_peak_9187	240.03
chr17	29282798	29283398	MACS_peak_9199	57.48
chr17	29314774	29317539	MACS_peak_9202	100.06
chr17	29414355	29414876	MACS_peak_9209	50.96
chr17	29497271	29499245	MACS_peak_9213	217.41
chr17	29589748	29592217	MACS_peak_9218	270.14
chr17	29594887	29597081	MACS_peak_9219	71.68
chr17	29699660	29700127	MACS_peak_9226	57.9
chr17	30378032	30378791	MACS_peak_9243	213.38
chr17	31479990	31481241	MACS_peak_9275	103.78
chr17	31629225	31632128	MACS_peak_9285	207.2
chr17	31676410	31680694	MACS_peak_9288	124.39
chr18	165973	166507	MACS_peak_9295	54.77
chr18	190921	191862	MACS_peak_9297	60.43
chr18	211256	212475	MACS_peak_9299	638.06
chr18	3072712	3073284	MACS_peak_9356	55.52
chr18	3853392	3854727	MACS_peak_9373	292.5
chr18	3943546	3944336	MACS_peak_9374	163.35
chr18	3969639	3970699	MACS_peak_9375	294.88
chr18	4642429	4644210	MACS_peak_9390	209.4
chr18	4774659	4776460	MACS_peak_9394	758.15
chr18	4814109	4814795	MACS_peak_9397	74.04
chr18	5472110	5473426	MACS_peak_9413	256.44
chr18	5702071	5703684	MACS_peak_9429	112.13
chr18	5733261	5734506	MACS_peak_9430	78.89
chr18	5790001	5791651	MACS_peak_9434	203.82
chr18	6315475	6316012	MACS_peak_9453	62.38
chr18	8026812	8027384	MACS_peak_9473	66.44
chr18	8535272	8536651	MACS_peak_9477	115.48
chr18	8662908	8664747	MACS_peak_9483	98.95
chr18	8711919	8714542	MACS_peak_9484	256.29
chr18	10192433	10194098	MACS_peak_9504	111.48
chr18	10312106	10312581	MACS_peak_9510	56.09
chr18	10418718	10419517	MACS_peak_9511	103.05
chr18	10916097	10918081	MACS_peak_9520	150.96
chr18	11175245	11176099	MACS_peak_9533	342.9
chr18	11528210	11529981	MACS_peak_9548	275.26
chr18	11999398	12000137	MACS_peak_9555	61.47
chr18	12043547	12044908	MACS_peak_9557	321.55
chr18	12510582	12511627	MACS_peak_9572	156.94
chr18	12561672	12563301	MACS_peak_9577	131.65
chr18	12653549	12654362	MACS_peak_9583	101.92
chr18	13995680	14000004	MACS_peak_9602	1440.49
chr18	14009100	14011338	MACS_peak_9604	266.98
chr18	14059935	14060987	MACS_peak_9609	100.95
chr18	14113337	14113972	MACS_peak_9611	74.94
chr18	14342549	14344538	MACS_peak_9616	664.98
chr18	14417777	14418626	MACS_peak_9624	85.24
chr18	14438092	14439256	MACS_peak_9626	76.02
chr18	14668959	14669904	MACS_peak_9630	497.21
chr18	14682938	14684347	MACS_peak_9633	68.88
chr18	14688565	14689932	MACS_peak_9634	97.69
chr18	14771143	14771622	MACS_peak_9639	56.27
chr18	14809507	14810713	MACS_peak_9641	133.29
chr18	14826263	14827289	MACS_peak_9643	86.53
chr18	15021902	15022939	MACS_peak_9653	104.56
chr18	15090685	15092005	MACS_peak_9654	289.66
chr18	15110744	15112652	MACS_peak_9655	180.43
chr18	15224042	15227390	MACS_peak_9662	474.19
chr18	15544740	15545585	MACS_peak_9672	139.74
chr18	15689420	15690940	MACS_peak_9673	544.19
chr18	16141318	16142046	MACS_peak_9676	85.02
chr18	16573033	16574808	MACS_peak_9687	266.37
chr18	16752339	16753557	MACS_peak_9689	149.65
chr18	17061691	17063101	MACS_peak_9691	189.19
chr18	17366198	17367916	MACS_peak_9695	179.5
chr18	17640630	17641175	MACS_peak_9710	53.39
chr18	17652943	17653452	MACS_peak_9713	52.44
chr18	18060903	18062127	MACS_peak_9732	164.38
chr18	18202567	18203440	MACS_peak_9738	57.99
chr18	18280101	18281393	MACS_peak_9743	263.97
chr18	18360767	18361513	MACS_peak_9747	69.64
chr18	18388675	18390229	MACS_peak_9748	395.78
chr18	18555857	18556541	MACS_peak_9753	63.12
chr18	18625942	18627403	MACS_peak_9757	219.66
chr18	18666354	18666952	MACS_peak_9758	68.61
chr18	18807892	18810380	MACS_peak_9764	328.94
chr18	18836598	18837173	MACS_peak_9766	71.51
chr18	18891220	18892445	MACS_peak_9768	382.74
chr18	18914692	18915377	MACS_peak_9769	67.26
chr18	18915687	18916304	MACS_peak_9770	65.86
chr18	18937166	18938044	MACS_peak_9771	159.95
chr18	19027976	19029369	MACS_peak_9776	203.93
chr18	19517177	19518360	MACS_peak_9790	140.25
chr18	19739220	19739741	MACS_peak_9796	79.81
chr18	19816050	19818030	MACS_peak_9801	644.97
chr18	20210657	20211131	MACS_peak_9808	51.36
chr18	20327734	20328780	MACS_peak_9811	121.1
chr18	21932738	21934467	MACS_peak_9855	153.96
chr18	21964352	21965454	MACS_peak_9857	74.54
chr18	22008324	22009042	MACS_peak_9860	75.21
chr18	22503691	22504386	MACS_peak_9878	68.98
chr18	22515657	22518058	MACS_peak_9879	167.1
chr18	22534205	22536229	MACS_peak_9880	251.82
chr18	22561898	22562925	MACS_peak_9883	170.82
chr18	22641202	22642069	MACS_peak_9885	142.38
chr18	25704872	25706458	MACS_peak_9906	72.65
chr18	25821569	25823010	MACS_peak_9910	130.63
chr18	25845566	25846444	MACS_peak_9912	86.59
chr18	25893329	25894997	MACS_peak_9918	127.85
chr18	25936721	25937691	MACS_peak_9921	273.07
chr18	25937779	25938600	MACS_peak_9922	99.95
chr18	26504111	26504972	MACS_peak_9928	73.3
chr18	26565238	26566594	MACS_peak_9931	186.25
chr18	26566647	26567102	MACS_peak_9932	59.34
chr18	27814101	27814733	MACS_peak_9953	81.12
chr18	28733542	28734481	MACS_peak_9981	130.35
chr18	29305715	29308670	MACS_peak_10001	182.35
chr19	807113	808671	MACS_peak_10039	267.76
chr19	835243	835930	MACS_peak_10043	76.04
chr19	1004990	1005689	MACS_peak_10047	72.16
chr19	1317087	1321067	MACS_peak_10057	349.24
chr19	1492608	1493265	MACS_peak_10060	61.28
chr19	1515657	1517562	MACS_peak_10062	588.89
chr19	1522083	1522689	MACS_peak_10063	56
chr19	1524377	1525582	MACS_peak_10064	58.65
chr19	1587617	1588438	MACS_peak_10067	127.89
chr19	2195455	2196341	MACS_peak_10081	163.19
chr19	2226533	2226905	MACS_peak_10086	92.16
chr19	2364896	2365706	MACS_peak_10092	552.87
chr19	2365781	2366364	MACS_peak_10093	73.33
chr19	2367235	2368364	MACS_peak_10094	113.55
chr19	2406057	2407938	MACS_peak_10096	398.49
chr19	2498408	2501731	MACS_peak_10105	644.5
chr19	2578539	2579725	MACS_peak_10110	78.57
chr19	2634120	2635589	MACS_peak_10113	131.76
chr19	2707705	2708546	MACS_peak_10117	56.76
chr19	2712063	2713219	MACS_peak_10118	64.44
chr19	2839667	2840135	MACS_peak_10127	52.12
chr19	2902284	2903315	MACS_peak_10128	288.74
chr19	3036170	3040192	MACS_peak_10132	202.02
chr19	3085763	3088124	MACS_peak_10137	331.66
chr19	3229052	3229826	MACS_peak_10150	126.78
chr19	3280986	3282563	MACS_peak_10153	303.84
chr19	4365633	4367394	MACS_peak_10166	583.76
chr19	4378063	4381145	MACS_peak_10168	529.1
chr19	4573184	4573901	MACS_peak_10175	85.42
chr19	4985798	4986632	MACS_peak_10182	54.23
chr19	5240872	5242013	MACS_peak_10186	50.51
chr19	5328054	5328639	MACS_peak_10191	61.43
chr19	6285569	6286406	MACS_peak_10206	167.32
chr19	6336448	6337579	MACS_peak_10209	127.86
chr19	6484634	6487096	MACS_peak_10216	180.06
chr19	6737658	6739217	MACS_peak_10229	216.05
chr19	6986632	6987280	MACS_peak_10232	52.12
chr19	7542078	7544272	MACS_peak_10243	556.98
chr19	7615828	7617142	MACS_peak_10247	56.31
chr19	7633913	7638100	MACS_peak_10249	381.62
chr19	7662120	7663647	MACS_peak_10251	52.96
chr19	7668306	7669828	MACS_peak_10252	94.92
chr19	8164963	8165930	MACS_peak_10285	96.81
chr19	8239926	8241023	MACS_peak_10288	165.96
chr19	8354739	8357287	MACS_peak_10297	752.87
chr19	8363873	8364428	MACS_peak_10298	58.34
chr19	8450118	8451346	MACS_peak_10300	141.33
chr19	8698404	8699638	MACS_peak_10308	71.67
chr19	8705742	8706469	MACS_peak_10309	52.93
chr19	8784606	8786374	MACS_peak_10311	255.43
chr19	8791177	8792123	MACS_peak_10312	238.44
chr19	8805227	8806876	MACS_peak_10313	221.85
chr19	8810550	8812143	MACS_peak_10314	55.67
chr19	8812205	8813085	MACS_peak_10315	296.91
chr19	8907811	8908483	MACS_peak_10318	75.53
chr19	8932910	8934535	MACS_peak_10319	54.51
chr19	8938865	8941216	MACS_peak_10320	265.69
chr19	8971037	8971690	MACS_peak_10323	69.26
chr19	9099711	9102867	MACS_peak_10335	575.77
chr19	9129821	9130877	MACS_peak_10338	55.25
chr19	9140363	9141240	MACS_peak_10339	129.36
chr19	9210389	9211012	MACS_peak_10341	70.91
chr19	9325529	9326323	MACS_peak_10346	79.82
chr19	9363987	9366500	MACS_peak_10349	136.12
chr19	9379191	9380834	MACS_peak_10352	87.55
chr19	9421473	9422422	MACS_peak_10353	67.12
chr19	9576167	9580320	MACS_peak_10363	571.96
chr19	9605267	9607063	MACS_peak_10367	175.2
chr19	9610298	9611655	MACS_peak_10368	220.74
chr19	9620550	9623241	MACS_peak_10369	225.75
chr19	9713358	9714631	MACS_peak_10373	236.48
chr19	9726063	9726602	MACS_peak_10374	54.42
chr19	10133632	10134466	MACS_peak_10390	178.44
chr19	10172923	10173501	MACS_peak_10392	62.93
chr19	10186828	10188092	MACS_peak_10393	209.05
chr19	10207833	10209323	MACS_peak_10394	176.78
chr19	10760749	10761344	MACS_peak_10418	54.62
chr19	10895731	10896257	MACS_peak_10425	59.86
chr19	10977776	10979623	MACS_peak_10428	347.28
chr19	11247764	11248695	MACS_peak_10437	87.98
chr19	11343502	11344820	MACS_peak_10441	237.42
chr19	11596855	11597653	MACS_peak_10446	98.25
chr19	11621422	11621875	MACS_peak_10448	54.09
chr19	11746703	11747511	MACS_peak_10454	92.01
chr19	12000169	12000983	MACS_peak_10461	154.59
chr19	12108593	12109220	MACS_peak_10463	59.56
chr19	13676827	13678451	MACS_peak_10479	125.18
chr19	13701221	13702904	MACS_peak_10480	892.8
chr19	13751905	13754082	MACS_peak_10482	426.5
chr19	14370392	14372105	MACS_peak_10495	255.15
chr19	14639688	14640968	MACS_peak_10508	113.22
chr19	14662834	14663645	MACS_peak_10510	108.1
chr19	14668703	14672014	MACS_peak_10511	177.06
chr19	14683632	14685020	MACS_peak_10512	114.01
chr19	14881720	14882822	MACS_peak_10518	97.56
chr19	14970749	14972207	MACS_peak_10520	75
chr19	14972230	14973226	MACS_peak_10521	262.33
chr19	15159533	15160686	MACS_peak_10528	154.47
chr19	15713987	15714513	MACS_peak_10548	55.76
chr19	15882522	15882986	MACS_peak_10551	58.52
chr19	15883085	15884511	MACS_peak_10552	193.47
chr19	16450081	16451234	MACS_peak_10562	137.29
chr19	16511315	16513676	MACS_peak_10565	193.36
chr19	16530914	16532630	MACS_peak_10566	209.86
chr19	16553442	16554358	MACS_peak_10567	153.21
chr19	16560371	16561198	MACS_peak_10569	99.62
chr19	16608664	16610004	MACS_peak_10570	144.46
chr19	16629488	16630569	MACS_peak_10573	58.34
chr19	16635905	16636744	MACS_peak_10574	72.37
chr19	16642664	16644005	MACS_peak_10575	616.33
chr19	16684421	16686034	MACS_peak_10579	137.56
chr19	17235515	17236493	MACS_peak_10596	98.86
chr19	17448844	17450027	MACS_peak_10602	150.49
chr19	17496558	17497368	MACS_peak_10604	120.78
chr19	17557622	17559828	MACS_peak_10610	65.41
chr19	17564280	17566230	MACS_peak_10611	225.44
chr19	17643672	17645059	MACS_peak_10618	285.55
chr19	18553427	18554633	MACS_peak_10639	241
chr19	18582190	18583358	MACS_peak_10641	263.1
chr19	18666808	18667296	MACS_peak_10649	78.89
chr19	18755671	18756851	MACS_peak_10655	394.3
chr19	19538057	19538583	MACS_peak_10660	77.55
chr19	20321123	20322272	MACS_peak_10680	241.53
chr19	20554580	20555411	MACS_peak_10692	150.43
chr19	20653479	20654170	MACS_peak_10695	67.78
chr19	20794889	20795409	MACS_peak_10700	51.12
chr19	20817107	20818133	MACS_peak_10703	248.66
chr19	21564963	21566699	MACS_peak_10731	595.56
chr19	21592073	21593158	MACS_peak_10733	54.28
chr19	22400839	22401908	MACS_peak_10750	96.76
chr19	22764137	22765396	MACS_peak_10753	439.48
chr19	23343037	23343752	MACS_peak_10768	123.56
chr2	5243737	5244679	MACS_peak_10788	77.82
chr2	5253302	5255349	MACS_peak_10789	744.08
chr2	5260758	5262970	MACS_peak_10790	231.3
chr2	5333704	5335108	MACS_peak_10791	216.98
chr2	5363205	5364763	MACS_peak_10793	187.3
chr2	5373592	5374731	MACS_peak_10795	101.08
chr2	5377812	5379128	MACS_peak_10796	66.12
chr2	5396985	5397660	MACS_peak_10797	68.1
chr2	5459147	5460063	MACS_peak_10799	156.32
chr2	5471028	5472078	MACS_peak_10800	156.13
chr2	5503302	5505709	MACS_peak_10804	681.11
chr2	5516555	5517176	MACS_peak_10805	55.36
chr2	5543375	5546502	MACS_peak_10806	266.53
chr2	5556496	5559314	MACS_peak_10807	263.73
chr2	5571071	5572436	MACS_peak_10809	237.39
chr2	5592044	5595496	MACS_peak_10811	260.69
chr2	5685769	5687171	MACS_peak_10817	266.07
chr2	6235447	6236139	MACS_peak_10829	134.35
chr2	6250225	6250778	MACS_peak_10832	64.64
chr2	6628257	6628925	MACS_peak_10854	59.79
chr2	14358387	14358921	MACS_peak_10902	97.04
chr2	15255991	15256387	MACS_peak_10915	103.46
chr2	15566761	15568149	MACS_peak_10930	637.18
chr2	15716458	15716877	MACS_peak_10939	65
chr2	16342739	16344671	MACS_peak_10955	206.25
chr2	16353303	16354727	MACS_peak_10956	171.57
chr2	16855167	16856115	MACS_peak_10972	398.61
chr2	17018201	17018648	MACS_peak_10979	54.9
chr2	17111948	17113340	MACS_peak_10981	565.97
chr2	17279693	17280905	MACS_peak_10988	291.53
chr2	17288388	17291273	MACS_peak_10989	436.97
chr2	17523387	17524486	MACS_peak_10999	136.68
chr2	18953538	18954265	MACS_peak_11031	74.09
chr2	18977295	18977762	MACS_peak_11033	57.9
chr2	19028750	19030599	MACS_peak_11036	358.47
chr2	19062675	19063566	MACS_peak_11039	54.56
chr2	19092931	19094765	MACS_peak_11042	206.35
chr2	19126832	19129812	MACS_peak_11046	321.06
chr2	19174051	19174600	MACS_peak_11048	52.24
chr2	19194734	19195811	MACS_peak_11049	288.32
chr2	19204477	19204959	MACS_peak_11050	50.17
chr2	19272757	19274703	MACS_peak_11053	241.79
chr2	19309294	19310211	MACS_peak_11054	134.17
chr2	19356344	19358519	MACS_peak_11057	174.25
chr2	19404897	19405646	MACS_peak_11060	137.15
chr2	19433080	19433761	MACS_peak_11062	63.7
chr2	20428300	20429028	MACS_peak_11101	60.06
chr2	20429993	20431021	MACS_peak_11102	130.63
chr2	20604504	20605204	MACS_peak_11108	50.86
chr2	20678995	20679547	MACS_peak_11111	75.05
chr2	20686075	20687072	MACS_peak_11113	82.39
chr2	20759692	20760904	MACS_peak_11118	128.66
chr2	20761361	20762891	MACS_peak_11119	330.75
chr2	21207239	21208350	MACS_peak_11127	222.57
chr2	21276116	21277102	MACS_peak_11130	112.73
chr2	21834218	21836282	MACS_peak_11145	223.41
chr2	21927673	21929519	MACS_peak_11153	73.23
chr2	21950361	21951441	MACS_peak_11156	67.69
chr2	22244362	22245446	MACS_peak_11163	104.42
chr2	22852811	22854004	MACS_peak_11182	151.52
chr2	23158618	23159923	MACS_peak_11189	115.87
chr2	23256858	23258260	MACS_peak_11196	73.85
chr2	23530184	23532263	MACS_peak_11208	704.49
chr2	23895290	23896671	MACS_peak_11219	191.02
chr2	23909965	23910499	MACS_peak_11220	60.25
chr2	24347695	24348217	MACS_peak_11238	112.59
chr2	27300444	27302208	MACS_peak_11289	127.95
chr2	27503507	27504951	MACS_peak_11301	207.1
chr2	28140254	28141173	MACS_peak_11309	115.89
chr2	28983386	28984776	MACS_peak_11359	52.13
chr2	29171363	29173139	MACS_peak_11367	242.45
chr2	29382812	29383758	MACS_peak_11372	180.69
chr2	31081041	31082479	MACS_peak_11439	260.48
chr20	281078	282012	MACS_peak_11448	131.51
chr20	470192	470926	MACS_peak_11450	84.21
chr20	557094	558797	MACS_peak_11455	114.9
chr20	1068978	1069798	MACS_peak_11478	150.68
chr20	1952131	1953159	MACS_peak_11498	150.21
chr20	2597343	2597902	MACS_peak_11509	68.2
chr20	2859858	2860474	MACS_peak_11521	56.46
chr20	2907701	2908694	MACS_peak_11524	319.38
chr20	3090046	3091832	MACS_peak_11533	460.17
chr20	3800393	3801056	MACS_peak_11539	76.82
chr20	4671425	4672504	MACS_peak_11546	98.26
chr20	4779278	4780192	MACS_peak_11550	119.45
chr20	4835156	4837085	MACS_peak_11554	324.5
chr20	4919303	4921220	MACS_peak_11559	109.22
chr20	4942506	4943698	MACS_peak_11562	172.63
chr20	5005047	5008514	MACS_peak_11569	262.48
chr20	5215893	5218104	MACS_peak_11578	296.18
chr20	5307222	5309054	MACS_peak_11586	228.11
chr20	5322487	5324024	MACS_peak_11587	303.21
chr20	5436695	5439157	MACS_peak_11595	395.17
chr20	5525258	5526770	MACS_peak_11603	66.44
chr20	5612819	5614005	MACS_peak_11606	155.94
chr20	5911023	5913129	MACS_peak_11611	427.72
chr20	5932129	5932803	MACS_peak_11612	117.76
chr20	5947673	5948776	MACS_peak_11614	233.56
chr20	6004590	6005481	MACS_peak_11616	132.15
chr20	6035394	6036824	MACS_peak_11618	83.87
chr20	6086371	6088693	MACS_peak_11622	166.85
chr20	6096054	6098716	MACS_peak_11623	87.2
chr20	6100458	6103930	MACS_peak_11624	75.05
chr20	6227613	6228455	MACS_peak_11633	153.9
chr20	6295214	6295793	MACS_peak_11635	61.01
chr20	6368917	6370591	MACS_peak_11641	212.2
chr20	6404643	6406055	MACS_peak_11645	93.99
chr20	6592243	6593177	MACS_peak_11649	105.78
chr20	6893369	6894761	MACS_peak_11661	122.42
chr20	6968290	6970507	MACS_peak_11668	752.74
chr20	6999063	7000201	MACS_peak_11669	166.84
chr20	7051474	7052389	MACS_peak_11670	122.37
chr20	7168409	7169579	MACS_peak_11675	70.49
chr20	7187347	7189091	MACS_peak_11676	248.57
chr20	7195979	7197730	MACS_peak_11677	151.2
chr20	7198391	7199129	MACS_peak_11678	62.85
chr20	7220213	7222277	MACS_peak_11679	165.7
chr20	7296244	7297579	MACS_peak_11681	78.57
chr20	7748891	7749616	MACS_peak_11686	74.34
chr20	7774141	7775274	MACS_peak_11687	160.52
chr20	7775724	7776552	MACS_peak_11688	166.36
chr20	7784524	7785073	MACS_peak_11689	55.18
chr20	7869278	7869887	MACS_peak_11691	61.71
chr20	8181923	8182735	MACS_peak_11704	59.21
chr20	8506807	8507771	MACS_peak_11723	94.79
chr20	8509641	8510305	MACS_peak_11724	62.9
chr20	8545288	8547766	MACS_peak_11727	1057.79
chr20	8839497	8840704	MACS_peak_11729	279.08
chr20	9314900	9315482	MACS_peak_11734	59.65
chr20	9590085	9590672	MACS_peak_11744	70.09
chr20	9712426	9713007	MACS_peak_11751	54.47
chr20	10396392	10397058	MACS_peak_11771	112.8
chr20	10435417	10436634	MACS_peak_11775	221.8
chr20	10495356	10498010	MACS_peak_11780	163.22
chr20	10690217	10690786	MACS_peak_11787	66.84
chr20	10728579	10729063	MACS_peak_11789	55.61
chr20	10742795	10743825	MACS_peak_11791	190.13
chr20	10917563	10918874	MACS_peak_11798	86.75
chr20	11064106	11065793	MACS_peak_11803	81.46
chr20	11071888	11073405	MACS_peak_11804	219.84
chr20	11548359	11548921	MACS_peak_11816	68.77
chr20	11642913	11644376	MACS_peak_11822	60.48
chr20	11664421	11665201	MACS_peak_11824	82.52
chr20	11703226	11703895	MACS_peak_11825	76.02
chr20	11841444	11842228	MACS_peak_11828	106.57
chr20	11883112	11888938	MACS_peak_11831	102.46
chr20	11927847	11929845	MACS_peak_11834	305.54
chr20	11944276	11944943	MACS_peak_11835	51.93
chr20	11998295	11998916	MACS_peak_11837	50.93
chr20	12108424	12109223	MACS_peak_11842	82.38
chr20	12973674	12976256	MACS_peak_11862	123.73
chr20	12982009	12982864	MACS_peak_11863	711.79
chr20	13082262	13083769	MACS_peak_11873	102.71
chr20	13103851	13105223	MACS_peak_11876	158.87
chr20	13296336	13296877	MACS_peak_11882	64.95
chr20	13381043	13382073	MACS_peak_11888	51.1
chr20	13399820	13400692	MACS_peak_11889	68.74
chr20	13428489	13428975	MACS_peak_11893	50.1
chr20	13493663	13494206	MACS_peak_11896	59.48
chr20	13549536	13550168	MACS_peak_11897	69.73
chr20	13748455	13749390	MACS_peak_11904	124.94
chr20	14339113	14339631	MACS_peak_11914	68.17
chr20	14344231	14345275	MACS_peak_11915	121.13
chr20	14367117	14367886	MACS_peak_11916	85.11
chr20	14376498	14378500	MACS_peak_11917	242.25
chr20	14383651	14385228	MACS_peak_11918	79.58
chr20	14393001	14393760	MACS_peak_11920	59.35
chr20	14578137	14579022	MACS_peak_11925	79.02
chr20	14583049	14584133	MACS_peak_11926	131.1
chr20	14586884	14587785	MACS_peak_11927	126.38
chr20	14592053	14593625	MACS_peak_11928	104.51
chr20	14620959	14622169	MACS_peak_11931	175.52
chr20	14653238	14654427	MACS_peak_11935	124.72
chr20	14673272	14673763	MACS_peak_11937	67.1
chr20	14717309	14719014	MACS_peak_11938	218.69
chr20	14901486	14902982	MACS_peak_11943	180.75
chr20	14903740	14904548	MACS_peak_11944	59.98
chr20	14992934	14993825	MACS_peak_11949	126.59
chr20	15117245	15118857	MACS_peak_11953	129.85
chr20	15334885	15336482	MACS_peak_11967	127.12
chr20	15342350	15343558	MACS_peak_11968	92.9
chr20	15379228	15380029	MACS_peak_11970	69.37
chr20	15407854	15409896	MACS_peak_11971	173.67
chr20	15470707	15472136	MACS_peak_11974	62.67
chr20	15475775	15477936	MACS_peak_11975	57.25
chr20	15481261	15482931	MACS_peak_11976	107.45
chr20	15730712	15733282	MACS_peak_11987	491.25
chr20	15780478	15781277	MACS_peak_11993	57.42
chr20	16267170	16268339	MACS_peak_12016	67.57
chr20	16322800	16324767	MACS_peak_12018	54.86
chr20	16374737	16375799	MACS_peak_12022	66.32
chr20	16469343	16471451	MACS_peak_12027	375.82
chr20	16514988	16517279	MACS_peak_12032	235.31
chr20	16646679	16647709	MACS_peak_12041	55.65
chr20	16692379	16693745	MACS_peak_12045	179.14
chr20	16698772	16699361	MACS_peak_12046	64.61
chr20	16716872	16718616	MACS_peak_12047	165.19
chr20	16789927	16791250	MACS_peak_12051	60.8
chr20	16801912	16803074	MACS_peak_12052	80.24
chr20	16819561	16820532	MACS_peak_12053	53.26
chr20	16844720	16845597	MACS_peak_12056	113.57
chr20	16905889	16910841	MACS_peak_12060	99.11
chr20	16917005	16919166	MACS_peak_12061	619.76
chr20	17149187	17151188	MACS_peak_12065	205.52
chr20	17282122	17283485	MACS_peak_12073	161.81
chr20	17330088	17331540	MACS_peak_12076	205.42
chr20	17337771	17340568	MACS_peak_12077	704.82
chr20	17430008	17431098	MACS_peak_12084	59.18
chr20	17476424	17477255	MACS_peak_12088	75.35
chr20	17683279	17684183	MACS_peak_12093	58.75
chr20	17785106	17786091	MACS_peak_12097	58.98
chr20	17802062	17803116	MACS_peak_12098	110.36
chr20	17804631	17805409	MACS_peak_12099	73.78
chr20	17824793	17825869	MACS_peak_12100	189.62
chr20	17875320	17876977	MACS_peak_12104	166.17
chr20	17928789	17931112	MACS_peak_12108	333.96
chr20	17945781	17948271	MACS_peak_12109	208.42
chr20	18030996	18032969	MACS_peak_12116	131.22
chr20	18163748	18164298	MACS_peak_12123	87.61
chr20	18186869	18189050	MACS_peak_12125	103.13
chr20	18267859	18269826	MACS_peak_12128	396.96
chr20	18328473	18329165	MACS_peak_12133	61.42
chr20	18348074	18349315	MACS_peak_12134	381.7
chr20	18514027	18514622	MACS_peak_12143	53.32
chr20	18888285	18890865	MACS_peak_12151	211.05
chr20	19025844	19027201	MACS_peak_12158	82.95
chr20	19035947	19036790	MACS_peak_12159	67.54
chr20	19292650	19293423	MACS_peak_12165	69.75
chr20	19302468	19303451	MACS_peak_12166	70.36
chr20	19425152	19426013	MACS_peak_12176	57.7
chr20	19429764	19432457	MACS_peak_12177	356.66
chr20	19440448	19441535	MACS_peak_12178	139.51
chr20	19446303	19447525	MACS_peak_12179	153.51
chr20	19726437	19728170	MACS_peak_12194	353.9
chr20	20027009	20031013	MACS_peak_12213	156.01
chr20	20061215	20063043	MACS_peak_12217	133.83
chr20	20068239	20070794	MACS_peak_12218	645.91
chr20	20090441	20092847	MACS_peak_12220	271.3
chr20	20098974	20100153	MACS_peak_12221	52.9
chr20	20102994	20104359	MACS_peak_12222	112.56
chr20	20745827	20747851	MACS_peak_12228	318.87
chr20	21557080	21557574	MACS_peak_12238	132.61
chr20	21889427	21890059	MACS_peak_12250	105.66
chr20	22284580	22285586	MACS_peak_12267	60.55
chr20	22744643	22745581	MACS_peak_12278	65.19
chr20	23376818	23377415	MACS_peak_12284	51.9
chr21	353153	353857	MACS_peak_12302	132.11
chr21	370705	372447	MACS_peak_12304	261.24
chr21	842385	843478	MACS_peak_12315	64.48
chr21	1613725	1614379	MACS_peak_12324	58.79
chr21	1614709	1615494	MACS_peak_12325	56.91
chr21	1875665	1876432	MACS_peak_12326	103.31
chr21	1877352	1878363	MACS_peak_12327	127.4
chr21	1995892	1996444	MACS_peak_12330	69.18
chr21	2241387	2242645	MACS_peak_12338	111.6
chr21	6251188	6252706	MACS_peak_12389	270.6
chr21	6322512	6323735	MACS_peak_12392	107.24
chr21	6570446	6571069	MACS_peak_12403	141.11
chr21	6858224	6859599	MACS_peak_12415	176.33
chr21	7182041	7182892	MACS_peak_12426	96.67
chr21	7349807	7350466	MACS_peak_12431	59.1
chr21	7350551	7351223	MACS_peak_12432	67.03
chr21	7380351	7381537	MACS_peak_12434	135.35
chr21	8031652	8032440	MACS_peak_12443	65.97
chr21	8347589	8348224	MACS_peak_12457	98.83
chr21	8446866	8447644	MACS_peak_12462	107.06
chr21	8630217	8630769	MACS_peak_12466	52.43
chr21	8669034	8669730	MACS_peak_12467	101.48
chr21	8916008	8916581	MACS_peak_12469	90.13
chr21	9082446	9082917	MACS_peak_12470	56.1
chr21	9117331	9118270	MACS_peak_12472	51.87
chr21	9118360	9119238	MACS_peak_12473	56.3
chr21	9124214	9124825	MACS_peak_12474	67.65
chr21	9146427	9148287	MACS_peak_12475	173.22
chr21	9160448	9161227	MACS_peak_12476	72.05
chr21	9211304	9211896	MACS_peak_12477	71
chr21	9329797	9330936	MACS_peak_12484	84.43
chr21	9334430	9336689	MACS_peak_12485	250.89
chr21	9462473	9464054	MACS_peak_12487	344.07
chr21	9487389	9490268	MACS_peak_12489	218.42
chr21	9506827	9508371	MACS_peak_12491	186.52
chr21	9587705	9588443	MACS_peak_12494	107.15
chr21	9634242	9635597	MACS_peak_12495	146.27
chr21	9680216	9680985	MACS_peak_12500	69.25
chr21	9689526	9691878	MACS_peak_12501	247.31
chr21	9711216	9712423	MACS_peak_12504	110.29
chr21	9780916	9781961	MACS_peak_12508	120.09
chr21	9795214	9795553	MACS_peak_12509	57.9
chr21	10056864	10057496	MACS_peak_12514	75.35
chr21	10201865	10204953	MACS_peak_12525	245.52
chr21	10208238	10210035	MACS_peak_12526	175.58
chr21	10223192	10224278	MACS_peak_12527	140.79
chr21	10299894	10301971	MACS_peak_12535	108.83
chr21	10302958	10303826	MACS_peak_12536	50.18
chr21	10359934	10362068	MACS_peak_12540	373.59
chr21	10693070	10693733	MACS_peak_12547	94.4
chr21	11175360	11177117	MACS_peak_12550	300.74
chr21	11273450	11274725	MACS_peak_12557	235.64
chr21	11387565	11388640	MACS_peak_12558	63.83
chr21	11393658	11394921	MACS_peak_12560	136.57
chr21	11526176	11527741	MACS_peak_12565	201.32
chr21	11532414	11532942	MACS_peak_12566	61.17
chr21	12078511	12079157	MACS_peak_12585	103.3
chr21	12253836	12255123	MACS_peak_12592	341.52
chr21	12260133	12261173	MACS_peak_12593	90.35
chr21	12538703	12539529	MACS_peak_12609	85.12
chr21	12548633	12549798	MACS_peak_12610	155.99
[truncated: 1,992 more rows]

## Sheet: zebrafish_OPARRs
Zv9_NA13	10191	11412	MACS_peak_22	138.29
Zv9_NA205	8	5305	MACS_peak_66	1499.27
Zv9_NA222	9779	10450	MACS_peak_78	54.51
Zv9_NA234	5381	7303	MACS_peak_83	509.62
Zv9_NA334	99	763	MACS_peak_143	55.13
Zv9_NA372	9816	10928	MACS_peak_165	78.81
Zv9_NA372	50444	51645	MACS_peak_166	64.92
Zv9_NA372	91815	92608	MACS_peak_168	69.38
Zv9_NA48	102752	103750	MACS_peak_240	79.36
Zv9_NA536	3996	4875	MACS_peak_274	65.81
Zv9_NA540	19595	20530	MACS_peak_279	88.48
Zv9_NA549	18241	20002	MACS_peak_282	117.37
Zv9_NA55	7	905	MACS_peak_283	96.84
Zv9_NA573	1604	2918	MACS_peak_292	215.84
Zv9_NA595	2760	6898	MACS_peak_305	109.61
Zv9_NA689	12765	15421	MACS_peak_366	76.4
Zv9_NA698	68405	71347	MACS_peak_377	199.96
Zv9_NA708	250	878	MACS_peak_385	52.37
Zv9_NA73	328	977	MACS_peak_401	75.56
Zv9_NA735	149886	151777	MACS_peak_408	160.13
Zv9_NA745	1	875	MACS_peak_414	185.81
Zv9_NA822	47953	49838	MACS_peak_436	110.4
Zv9_NA822	70651	72350	MACS_peak_437	70.35
Zv9_NA941	681	1291	MACS_peak_499	54
Zv9_NA96	13369	13974	MACS_peak_508	54.46
Zv9_NA964	32	509	MACS_peak_509	98.54
Zv9_NA982	706	1576	MACS_peak_515	125.22
Zv9_NA992	1017	1572	MACS_peak_520	72.77
Zv9_scaffold3455	401313	402461	MACS_peak_527	69.1
Zv9_scaffold3471	117865	119210	MACS_peak_542	142.04
Zv9_scaffold3478	16684	18395	MACS_peak_553	75.1
Zv9_scaffold3478	43236	46024	MACS_peak_554	73.73
Zv9_scaffold3497	44842	45352	MACS_peak_577	51.14
Zv9_scaffold3504	58881	60194	MACS_peak_593	50.64
Zv9_scaffold3511	140453	142578	MACS_peak_603	141.8
Zv9_scaffold3529	251	1470	MACS_peak_633	202.44
Zv9_scaffold3530	1453984	1454586	MACS_peak_637	54.74
Zv9_scaffold3540	244258	245591	MACS_peak_654	101.85
Zv9_scaffold3540	254391	257008	MACS_peak_655	179.78
Zv9_scaffold3540	274059	274914	MACS_peak_657	56.86
Zv9_scaffold3556	63267	64954	MACS_peak_684	67.34
Zv9_scaffold3563	292459	295828	MACS_peak_700	196.73
chr1	6515126	6516795	MACS_peak_804	52.06
chr1	7559603	7560536	MACS_peak_813	88.77
chr1	10852437	10854096	MACS_peak_848	100.43
chr1	12157305	12159885	MACS_peak_864	115.05
chr1	14096900	14099727	MACS_peak_887	54.13
chr1	15290444	15291230	MACS_peak_904	80.54
chr1	16123433	16127415	MACS_peak_912	150.94
chr1	17088072	17089050	MACS_peak_926	118.95
chr1	17453789	17454623	MACS_peak_933	54.72
chr1	17599071	17603096	MACS_peak_937	381.46
chr1	18411713	18413027	MACS_peak_956	64.45
chr1	21175502	21176985	MACS_peak_983	99.53
chr1	22568859	22571819	MACS_peak_1009	76.18
chr1	22736147	22736955	MACS_peak_1012	52.24
chr1	22749685	22750267	MACS_peak_1013	56.65
chr1	23688836	23689838	MACS_peak_1022	86.48
chr1	23756313	23757783	MACS_peak_1023	130.44
chr1	24131326	24132152	MACS_peak_1037	76.55
chr1	24705731	24706487	MACS_peak_1043	50.61
chr1	24755627	24758011	MACS_peak_1044	78.89
chr1	25230653	25232113	MACS_peak_1051	88.23
chr1	26059241	26060090	MACS_peak_1065	54.33
chr1	26106918	26107960	MACS_peak_1068	77.54
chr1	26168842	26169999	MACS_peak_1070	133.34
chr1	26846546	26847905	MACS_peak_1073	61.05
chr1	28857778	28859310	MACS_peak_1096	70.63
chr1	30759759	30761582	MACS_peak_1121	57.92
chr1	30777177	30777786	MACS_peak_1122	60.28
chr1	30984217	30985760	MACS_peak_1124	139.64
chr1	31195082	31195795	MACS_peak_1127	55.22
chr1	31225336	31225936	MACS_peak_1128	54.29
chr1	32942446	32943175	MACS_peak_1135	65.22
chr1	33021753	33024453	MACS_peak_1136	94.17
chr1	34033740	34034292	MACS_peak_1146	53.31
chr1	35338505	35341339	MACS_peak_1162	143.8
chr1	35405261	35408643	MACS_peak_1164	177.78
chr1	35423825	35424763	MACS_peak_1165	76.76
chr1	35638437	35640203	MACS_peak_1172	57.29
chr1	35837464	35838174	MACS_peak_1174	57.94
chr1	35931779	35932535	MACS_peak_1177	77.44
chr1	36531286	36532467	MACS_peak_1180	65.98
chr1	37221848	37224044	MACS_peak_1184	92.86
chr1	39993073	39994174	MACS_peak_1210	50.05
chr1	40288923	40289690	MACS_peak_1215	76.4
chr1	42190010	42191135	MACS_peak_1264	62.52
chr1	42494387	42495085	MACS_peak_1269	58.06
chr1	43958707	43961596	MACS_peak_1278	164.93
chr1	44058712	44059693	MACS_peak_1279	115.99
chr1	44555025	44555860	MACS_peak_1288	63.76
chr1	44649472	44650205	MACS_peak_1289	60.89
chr1	45854054	45854986	MACS_peak_1311	116.96
chr1	47803507	47805059	MACS_peak_1359	71.06
chr1	50375744	50377472	MACS_peak_1384	121.82
chr1	50764297	50764905	MACS_peak_1388	54.18
chr1	51093464	51094020	MACS_peak_1391	59.26
chr1	52025705	52027313	MACS_peak_1414	129.14
chr1	52675906	52677058	MACS_peak_1427	82.32
chr1	54593764	54595213	MACS_peak_1465	208.25
chr1	56294696	56295845	MACS_peak_1494	84.14
chr1	60004332	60005942	MACS_peak_1520	125.26
chr10	2959372	2962345	MACS_peak_1577	238.73
chr10	3208704	3209806	MACS_peak_1583	109.51
chr10	4131732	4133462	MACS_peak_1603	75.78
chr10	7296624	7298387	MACS_peak_1664	118.94
chr10	7310825	7312670	MACS_peak_1665	55.26
chr10	8013774	8014758	MACS_peak_1677	98.25
chr10	9292152	9293120	MACS_peak_1695	93.82
chr10	10274523	10277512	MACS_peak_1710	88.52
chr10	10819288	10822957	MACS_peak_1722	214.2
chr10	10843130	10844741	MACS_peak_1724	118.23
chr10	10894845	10896254	MACS_peak_1729	54.62
chr10	10901090	10902310	MACS_peak_1730	76.69
chr10	10921389	10924615	MACS_peak_1731	144.1
chr10	11428459	11429363	MACS_peak_1745	78.99
chr10	11597010	11597610	MACS_peak_1747	58.04
chr10	11729508	11730574	MACS_peak_1750	94.39
chr10	13061996	13063448	MACS_peak_1767	119.65
chr10	16322160	16323002	MACS_peak_1804	53.55
chr10	16857490	16858108	MACS_peak_1815	57.75
chr10	17457365	17458520	MACS_peak_1823	61.65
chr10	17731706	17732880	MACS_peak_1831	98.54
chr10	17749282	17751021	MACS_peak_1834	63.4
chr10	20230572	20231645	MACS_peak_1854	50.6
chr10	22212670	22213268	MACS_peak_1873	61.38
chr10	22729340	22730239	MACS_peak_1880	66.11
chr10	25103533	25104317	MACS_peak_1907	68.27
chr10	25110939	25111777	MACS_peak_1908	53.15
chr10	26227480	26228762	MACS_peak_1921	113.55
chr10	26249189	26250049	MACS_peak_1922	67.15
chr10	26320393	26322010	MACS_peak_1926	98.06
chr10	27217951	27218902	MACS_peak_1938	91.71
chr10	27293993	27295289	MACS_peak_1940	147.44
chr10	27302105	27302737	MACS_peak_1941	52.02
chr10	27765263	27769014	MACS_peak_1956	69.78
chr10	27791067	27793133	MACS_peak_1957	73.2
chr10	27839105	27840848	MACS_peak_1959	62.74
chr10	27844746	27848997	MACS_peak_1960	81.67
chr10	28043293	28046801	MACS_peak_1965	144.86
chr10	28149861	28151323	MACS_peak_1966	88.22
chr10	28725073	28727502	MACS_peak_1973	169.87
chr10	29333220	29333736	MACS_peak_1995	50.55
chr10	29659367	29660260	MACS_peak_2001	73.96
chr10	32014989	32015566	MACS_peak_2013	57.14
chr10	32153317	32154795	MACS_peak_2014	64.93
chr10	32250050	32251575	MACS_peak_2016	74.66
chr10	32550175	32551865	MACS_peak_2025	76.52
chr10	32892994	32894772	MACS_peak_2030	271.64
chr10	33276417	33278585	MACS_peak_2046	100.1
chr10	34641404	34643351	MACS_peak_2071	56.84
chr10	35220722	35221391	MACS_peak_2078	54.69
chr10	36085802	36086778	MACS_peak_2090	70.93
chr10	36408614	36410485	MACS_peak_2104	63.26
chr10	39077135	39078156	MACS_peak_2137	80.24
chr10	39580788	39581960	MACS_peak_2143	60.83
chr10	39747477	39749894	MACS_peak_2146	66.99
chr10	43226571	43227535	MACS_peak_2174	50.49
chr10	43427854	43428758	MACS_peak_2179	80.72
chr10	45094409	45095460	MACS_peak_2212	76.22
chr10	45108893	45110344	MACS_peak_2213	148.11
chr10	45386011	45388176	MACS_peak_2224	195.31
chr10	46180962	46182603	MACS_peak_2238	61.12
chr10	46187311	46188609	MACS_peak_2239	52.55
chr11	831447	832905	MACS_peak_2273	212.58
chr11	2257485	2258058	MACS_peak_2302	70.67
chr11	5595534	5596377	MACS_peak_2344	57.43
chr11	5813868	5815546	MACS_peak_2348	210.94
chr11	6074726	6075764	MACS_peak_2355	81.53
chr11	6117898	6119704	MACS_peak_2357	117.58
chr11	6123992	6127470	MACS_peak_2358	92.31
chr11	7733559	7734627	MACS_peak_2397	82.67
chr11	8099970	8100812	MACS_peak_2400	53.15
chr11	8630552	8632888	MACS_peak_2407	353.59
chr11	11855562	11857237	MACS_peak_2442	93.06
chr11	12090901	12091670	MACS_peak_2450	75.9
chr11	12281058	12282108	MACS_peak_2453	50.59
chr11	16772867	16774352	MACS_peak_2517	65.06
chr11	16785269	16787032	MACS_peak_2519	104.2
chr11	18233406	18234152	MACS_peak_2531	62.71
chr11	18713402	18714426	MACS_peak_2545	84.17
chr11	19028298	19031387	MACS_peak_2552	121.29
chr11	19056748	19060456	MACS_peak_2554	189.47
chr11	19131369	19136048	MACS_peak_2558	73.86
chr11	19140526	19144294	MACS_peak_2559	111.15
chr11	19155462	19158417	MACS_peak_2560	246.54
chr11	19169344	19171907	MACS_peak_2561	87.96
chr11	19235986	19237023	MACS_peak_2564	59
chr11	19315402	19317035	MACS_peak_2566	134.38
chr11	22480097	22483323	MACS_peak_2612	129.03
chr11	22590751	22591933	MACS_peak_2616	59.79
chr11	22775259	22778125	MACS_peak_2624	191.31
chr11	22915560	22916546	MACS_peak_2627	84.69
chr11	22923500	22924439	MACS_peak_2628	52.28
chr11	23323420	23324562	MACS_peak_2635	92.14
chr11	23330062	23331168	MACS_peak_2636	56.61
chr11	23953369	23954958	MACS_peak_2641	96.89
chr11	24127305	24128933	MACS_peak_2647	55.61
chr11	25042462	25044227	MACS_peak_2670	77.02
chr11	25664395	25666301	MACS_peak_2677	53.46
chr11	25873010	25874709	MACS_peak_2687	78.84
chr11	25935223	25939830	MACS_peak_2690	126.45
chr11	25967139	25969704	MACS_peak_2691	223.9
chr11	26177777	26180562	MACS_peak_2698	330.89
chr11	26730962	26733719	MACS_peak_2718	87.94
chr11	27513532	27514811	MACS_peak_2734	148.71
chr11	27552885	27553584	MACS_peak_2738	76.72
chr11	27712531	27713490	MACS_peak_2743	66.24
chr11	28360706	28363404	MACS_peak_2749	157.15
chr11	28799645	28800807	MACS_peak_2762	68.46
chr11	29133997	29136074	MACS_peak_2766	88.15
chr11	29182973	29184042	MACS_peak_2767	92.06
chr11	30224223	30225015	MACS_peak_2777	96.83
chr11	30332158	30334080	MACS_peak_2778	84.73
chr11	30803172	30804945	MACS_peak_2786	108.7
chr11	31357313	31358170	MACS_peak_2798	69.33
chr11	31916645	31919124	MACS_peak_2806	114.45
chr11	32234628	32235532	MACS_peak_2813	74.87
chr11	32245613	32246699	MACS_peak_2814	123.65
chr11	35207436	35208595	MACS_peak_2835	99.5
chr11	36660734	36662851	MACS_peak_2849	252.02
chr11	36672162	36674389	MACS_peak_2850	108.86
chr11	38965477	38968817	MACS_peak_2891	147.31
chr11	38983550	38985314	MACS_peak_2892	71.04
chr11	40368352	40370003	MACS_peak_2905	143.87
chr11	40552442	40553414	MACS_peak_2909	85.88
chr11	42175303	42178593	MACS_peak_2924	198.86
chr11	42494834	42498162	MACS_peak_2929	131.8
chr11	43073590	43074497	MACS_peak_2938	72.32
chr11	43770971	43772195	MACS_peak_2957	77.68
chr11	44254913	44256493	MACS_peak_2962	152.77
chr11	45045368	45046819	MACS_peak_2977	67.97
chr11	45118588	45120225	MACS_peak_2982	167.56
chr11	45204139	45205124	MACS_peak_2983	461.86
chr11	45232714	45233778	MACS_peak_2984	74.26
chr11	45552885	45553431	MACS_peak_2993	65.43
chr11	46359469	46362182	MACS_peak_3021	166.34
chr12	35192	36290	MACS_peak_3033	58.16
chr12	463699	464449	MACS_peak_3039	64.6
chr12	938182	940487	MACS_peak_3049	179.06
chr12	1760186	1761780	MACS_peak_3065	99.22
chr12	2304382	2305502	MACS_peak_3074	81.65
chr12	6451202	6451867	MACS_peak_3144	56.43
chr12	6629978	6631504	MACS_peak_3146	111.92
chr12	6686140	6686989	MACS_peak_3149	50.49
chr12	8249283	8249893	MACS_peak_3158	50.41
chr12	10128090	10128623	MACS_peak_3192	55.19
chr12	11527375	11527906	MACS_peak_3217	60.86
chr12	11624885	11625472	MACS_peak_3219	50.05
chr12	12054164	12055808	MACS_peak_3224	98.11
chr12	12634297	12635593	MACS_peak_3231	74.22
chr12	15021991	15023332	MACS_peak_3246	140.03
chr12	16630812	16633313	MACS_peak_3268	103.2
chr12	17418173	17419301	MACS_peak_3273	114.77
chr12	18036958	18039500	MACS_peak_3278	117.19
chr12	18109670	18110318	MACS_peak_3279	69.09
chr12	18202685	18203686	MACS_peak_3283	103.49
chr12	18604835	18605642	MACS_peak_3295	67.65
chr12	18628229	18628886	MACS_peak_3296	58.62
chr12	18794085	18795336	MACS_peak_3302	169.45
chr12	20339745	20341013	MACS_peak_3325	57.87
chr12	20869834	20871597	MACS_peak_3335	164.19
chr12	21830613	21831841	MACS_peak_3347	90.58
chr12	23225644	23226802	MACS_peak_3357	72.33
chr12	24153065	24153781	MACS_peak_3370	62.43
chr12	25318881	25319867	MACS_peak_3387	53.5
chr12	26510779	26512685	MACS_peak_3399	150.04
chr12	26641818	26642808	MACS_peak_3405	68.71
chr12	26828416	26834473	MACS_peak_3409	96.7
chr12	27151566	27152785	MACS_peak_3415	108.07
chr12	27261663	27262196	MACS_peak_3418	55.19
chr12	27333466	27335241	MACS_peak_3421	75.64
chr12	27388147	27388714	MACS_peak_3424	58.14
chr12	27563669	27565780	MACS_peak_3428	186.83
chr12	27766344	27767174	MACS_peak_3434	50.65
chr12	27884767	27885855	MACS_peak_3435	64.38
chr12	28474710	28476440	MACS_peak_3454	163.73
chr12	28693509	28696777	MACS_peak_3463	110.61
chr12	28722545	28724558	MACS_peak_3464	191.38
chr12	29028411	29029834	MACS_peak_3475	56.56
chr12	30014851	30016487	MACS_peak_3483	85.93
chr12	30739464	30741320	MACS_peak_3497	129.65
chr12	32080273	32081081	MACS_peak_3510	108.5
chr12	32226970	32228749	MACS_peak_3514	141.04
chr12	32240111	32240998	MACS_peak_3515	56.88
chr12	32259603	32260527	MACS_peak_3516	57.33
chr12	32333410	32334505	MACS_peak_3517	55.62
chr12	32712585	32713651	MACS_peak_3522	104.1
chr12	32775528	32777854	MACS_peak_3526	89.22
chr12	32888856	32889984	MACS_peak_3528	61.46
chr12	33034617	33035180	MACS_peak_3529	85.98
chr12	33046772	33047392	MACS_peak_3530	53.09
chr12	33147991	33148597	MACS_peak_3532	60.58
chr12	33394981	33395672	MACS_peak_3539	52.15
chr12	34561580	34562444	MACS_peak_3546	65.89
chr12	35211360	35212834	MACS_peak_3555	61.17
chr12	35275598	35276764	MACS_peak_3557	63.45
chr12	35641050	35642092	MACS_peak_3568	73.31
chr12	36334277	36335957	MACS_peak_3582	73.98
chr12	36535672	36537799	MACS_peak_3589	87.67
chr12	36573682	36576175	MACS_peak_3591	101.37
chr12	36718440	36719889	MACS_peak_3597	80.49
chr12	36733994	36735609	MACS_peak_3598	116.16
chr12	37032099	37033281	MACS_peak_3609	67.62
chr12	37873778	37874558	MACS_peak_3627	82.1
chr12	38211328	38212626	MACS_peak_3631	101.37
chr12	38796586	38797346	MACS_peak_3646	86.44
chr12	42457631	42458267	MACS_peak_3667	57.68
chr12	44169987	44172242	MACS_peak_3676	95.75
chr12	46697437	46698209	MACS_peak_3695	51.76
chr12	49580910	49581880	MACS_peak_3711	70.06
chr12	49588209	49588864	MACS_peak_3712	53.36
chr12	49822316	49822773	MACS_peak_3719	56.75
chr12	50392669	50393434	MACS_peak_3726	50.86
chr13	444352	446572	MACS_peak_3749	89.14
chr13	840800	842468	MACS_peak_3757	134.18
chr13	1194548	1195684	MACS_peak_3766	72.67
chr13	2094800	2095750	MACS_peak_3777	66.83
chr13	2155155	2156641	MACS_peak_3782	53.92
chr13	4322040	4323035	MACS_peak_3811	193.65
chr13	4956875	4958326	MACS_peak_3831	79.49
chr13	4976707	4977962	MACS_peak_3832	108.53
chr13	5019584	5020499	MACS_peak_3833	51.23
chr13	5154654	5156422	MACS_peak_3837	101.73
chr13	5181965	5186219	MACS_peak_3839	101.78
chr13	5232530	5234445	MACS_peak_3841	80.31
chr13	5280236	5281395	MACS_peak_3843	106.31
chr13	5449550	5451563	MACS_peak_3847	195.02
chr13	5760388	5762516	MACS_peak_3858	71.58
chr13	6367223	6368777	MACS_peak_3867	146.5
chr13	6574495	6575341	MACS_peak_3872	79.89
chr13	6605206	6605852	MACS_peak_3873	117.67
chr13	7282743	7284447	MACS_peak_3879	129.56
chr13	7657075	7657838	MACS_peak_3883	52.53
chr13	8012093	8012734	MACS_peak_3889	57.21
chr13	9544735	9546190	MACS_peak_3909	185.5
chr13	9653602	9655494	MACS_peak_3910	84.92
chr13	9669579	9670850	MACS_peak_3911	56.9
chr13	9704755	9706566	MACS_peak_3913	63.19
chr13	10612923	10614011	MACS_peak_3926	89.93
chr13	10668043	10669502	MACS_peak_3928	118.01
chr13	11184921	11186863	MACS_peak_3936	97.69
chr13	11343575	11344276	MACS_peak_3941	57.79
chr13	11768416	11769454	MACS_peak_3949	79.86
chr13	12273694	12274746	MACS_peak_3953	80.32
chr13	13365191	13366551	MACS_peak_3975	138.89
chr13	14896325	14897205	MACS_peak_3988	58.3
chr13	14989200	14990145	MACS_peak_3989	77.63
chr13	16306491	16307596	MACS_peak_4004	83.33
chr13	16553203	16554675	MACS_peak_4008	123.92
chr13	16671177	16672464	MACS_peak_4011	75.89
chr13	17087866	17090060	MACS_peak_4014	131.74
chr13	17094434	17096094	MACS_peak_4015	68.21
chr13	17166012	17167374	MACS_peak_4016	64.95
chr13	17187269	17189522	MACS_peak_4018	71.47
chr13	17193215	17194989	MACS_peak_4019	85.3
chr13	17230000	17232081	MACS_peak_4020	77.06
chr13	17253113	17255585	MACS_peak_4021	110.43
chr13	17268134	17269302	MACS_peak_4022	86.27
chr13	17301476	17304213	MACS_peak_4023	105.55
chr13	17322041	17324864	MACS_peak_4025	84.74
chr13	17381147	17383695	MACS_peak_4026	218.19
chr13	17429195	17429733	MACS_peak_4029	58.38
chr13	17453014	17455948	MACS_peak_4032	161.98
chr13	17572549	17574095	MACS_peak_4035	61.93
chr13	17579620	17580586	MACS_peak_4036	54.85
chr13	17602916	17604865	MACS_peak_4037	275.99
chr13	17657573	17658374	MACS_peak_4038	59.8
chr13	18179243	18181444	MACS_peak_4046	248.88
chr13	18691117	18694147	MACS_peak_4063	355.32
chr13	18698240	18699533	MACS_peak_4064	988.25
chr13	18703222	18704700	MACS_peak_4065	598.13
chr13	18908944	18911039	MACS_peak_4069	59.41
chr13	19383548	19385288	MACS_peak_4073	89.73
chr13	19452454	19453463	MACS_peak_4075	51.22
chr13	19726339	19726886	MACS_peak_4076	53.8
chr13	21808892	21810577	MACS_peak_4087	58.14
chr13	22404837	22406351	MACS_peak_4107	93.3
chr13	22738400	22739878	MACS_peak_4114	103.11
chr13	23000594	23002398	MACS_peak_4121	80.89
chr13	23853229	23854533	MACS_peak_4133	120.83
chr13	23960267	23961338	MACS_peak_4137	58.04
chr13	24731859	24733079	MACS_peak_4159	134.9
chr13	25105622	25106951	MACS_peak_4173	69.73
chr13	25154015	25155411	MACS_peak_4176	92.16
chr13	25185591	25186892	MACS_peak_4177	139.6
chr13	26023994	26024851	MACS_peak_4203	82.7
chr13	26287375	26288843	MACS_peak_4209	100.74
chr13	26376916	26377739	MACS_peak_4210	159.69
chr13	26923218	26924351	MACS_peak_4212	75.77
chr13	27999545	28001153	MACS_peak_4224	92.61
chr13	28015176	28016374	MACS_peak_4225	89.07
chr13	28777752	28780210	MACS_peak_4231	86.89
chr13	28930388	28932363	MACS_peak_4237	123.58
chr13	29869772	29870483	MACS_peak_4248	55.44
chr13	30122459	30123368	MACS_peak_4251	57.79
chr13	30225279	30226814	MACS_peak_4254	130.33
chr13	30689582	30690499	MACS_peak_4268	54.1
chr13	30710613	30712411	MACS_peak_4269	182.71
chr13	30754619	30757698	MACS_peak_4272	162.15
chr13	30811422	30813214	MACS_peak_4273	84.78
chr13	30829842	30832690	MACS_peak_4275	79.6
chr13	30913659	30914950	MACS_peak_4280	91.32
chr13	31967738	31968789	MACS_peak_4303	91.97
chr13	33072798	33073625	MACS_peak_4316	72.27
chr13	33509517	33511591	MACS_peak_4327	82.3
chr13	33615247	33616850	MACS_peak_4330	68.01
chr13	34173864	34175523	MACS_peak_4350	71.83
chr13	34183003	34184586	MACS_peak_4351	98.23
chr13	35578599	35580351	MACS_peak_4367	112.17
chr13	35644476	35645516	MACS_peak_4370	82.64
chr13	35681245	35684124	MACS_peak_4373	52.36
chr13	36231086	36234702	MACS_peak_4379	69.2
chr13	36408754	36410746	MACS_peak_4389	144.71
chr13	37650757	37653073	MACS_peak_4421	117.15
chr13	38646305	38647253	MACS_peak_4431	70.53
chr13	39827350	39828274	MACS_peak_4436	78.8
chr13	40460018	40461658	MACS_peak_4442	123.66
chr13	43202148	43203343	MACS_peak_4468	105.27
chr13	47079396	47080562	MACS_peak_4519	59.74
chr13	47134018	47136852	MACS_peak_4520	121.16
chr13	49059913	49060849	MACS_peak_4546	57.97
chr13	50193429	50195297	MACS_peak_4564	127.35
chr13	50475680	50477129	MACS_peak_4575	127.58
chr13	50530085	50531428	MACS_peak_4577	94.92
chr13	52136602	52137771	MACS_peak_4601	55.21
chr13	52151020	52152212	MACS_peak_4602	125.48
chr13	52276872	52277368	MACS_peak_4609	51.98
chr13	53100060	53101708	MACS_peak_4618	111.37
chr13	54053909	54054638	MACS_peak_4634	91.35
chr14	104109	104886	MACS_peak_4637	59.36
chr14	432763	433928	MACS_peak_4649	76.06
chr14	3174687	3175379	MACS_peak_4683	52.64
chr14	3727576	3728750	MACS_peak_4686	177.7
chr14	4484641	4485807	MACS_peak_4692	89.6
chr14	5808226	5809191	MACS_peak_4711	93.81
chr14	6425110	6426628	MACS_peak_4718	110.58
chr14	6433817	6434794	MACS_peak_4719	78.46
chr14	6943809	6947101	MACS_peak_4727	336.97
chr14	7857071	7858096	MACS_peak_4746	50.57
chr14	8066998	8068003	MACS_peak_4759	58.27
chr14	9682003	9685493	MACS_peak_4778	132.64
chr14	10917852	10919382	MACS_peak_4787	78.98
chr14	11461734	11462440	MACS_peak_4791	54.23
chr14	12080940	12081946	MACS_peak_4794	63.15
chr14	13983590	13984522	MACS_peak_4812	104.94
chr14	14196415	14197536	MACS_peak_4819	50.11
chr14	14923455	14925939	MACS_peak_4828	117.82
chr14	17694325	17695487	MACS_peak_4842	56.74
chr14	18710171	18713060	MACS_peak_4855	56.72
chr14	18731161	18733675	MACS_peak_4856	68.46
chr14	22188929	22189733	MACS_peak_4889	78.71
chr14	22206019	22207017	MACS_peak_4890	63.05
chr14	22296309	22298064	MACS_peak_4892	232.89
chr14	23089002	23090066	MACS_peak_4905	68.78
chr14	24133962	24136718	MACS_peak_4914	125.17
chr14	24214644	24215442	MACS_peak_4917	76.25
chr14	24458705	24459486	MACS_peak_4919	66.95
chr14	24465734	24467488	MACS_peak_4920	74.97
chr14	24526103	24527684	MACS_peak_4922	50.78
chr14	27490596	27491550	MACS_peak_4986	56.39
chr14	27605624	27607566	MACS_peak_4993	144.35
chr14	27685793	27688728	MACS_peak_4995	129.44
chr14	27739188	27741617	MACS_peak_4998	213.1
chr14	27761741	27764145	MACS_peak_5001	127.55
chr14	28308506	28309174	MACS_peak_5004	60.8
chr14	30222083	30222824	MACS_peak_5019	62.65
chr14	30359460	30360519	MACS_peak_5021	51.47
chr14	30388313	30389045	MACS_peak_5022	55.13
chr14	31558207	31562138	MACS_peak_5029	135.55
chr14	31654213	31655072	MACS_peak_5034	61.27
chr14	31995741	31998099	MACS_peak_5052	60.4
chr14	32816149	32817973	MACS_peak_5072	69.46
chr14	32918191	32919120	MACS_peak_5076	84.95
chr14	33423639	33424286	MACS_peak_5081	52.7
chr14	33635480	33636572	MACS_peak_5090	70.55
chr14	33782318	33783317	MACS_peak_5099	59.89
chr14	33821251	33822226	MACS_peak_5102	57.28
chr14	34151238	34152202	MACS_peak_5107	84.59
chr14	34162361	34163896	MACS_peak_5108	64.69
chr14	34245872	34247066	MACS_peak_5109	97.91
chr14	34290595	34291914	MACS_peak_5112	94.47
chr14	35617096	35617718	MACS_peak_5136	59.01
chr14	36293679	36294706	MACS_peak_5144	58.93
chr14	36347212	36349497	MACS_peak_5145	160.98
chr14	36688552	36689673	MACS_peak_5151	57.8
chr14	37593543	37595454	MACS_peak_5160	96.01
chr14	39877606	39878256	MACS_peak_5176	62.86
chr14	40066244	40067245	MACS_peak_5179	97.96
chr14	41218448	41220069	MACS_peak_5201	95.14
chr14	41316265	41317534	MACS_peak_5202	56.85
chr14	41441628	41442488	MACS_peak_5204	76.32
chr14	41574038	41575247	MACS_peak_5207	51.7
chr14	42121811	42123365	MACS_peak_5216	89.58
chr14	43167338	43168236	MACS_peak_5229	55.29
chr14	45144942	45145797	MACS_peak_5239	60.35
chr14	47249678	47250851	MACS_peak_5250	90.26
chr14	47928893	47930047	MACS_peak_5262	132.57
chr14	48077436	48078670	MACS_peak_5264	63.34
chr14	51174413	51175443	MACS_peak_5309	55.62
chr14	51645108	51646595	MACS_peak_5316	56.48
chr15	57241	58283	MACS_peak_5334	70.68
chr15	176419	177351	MACS_peak_5338	55.83
chr15	1401202	1402317	MACS_peak_5362	79.17
chr15	2616354	2617325	MACS_peak_5380	79.16
chr15	3764572	3765526	MACS_peak_5396	84.53
chr15	4256385	4257451	MACS_peak_5402	66.79
chr15	6938468	6939243	MACS_peak_5428	61.37
chr15	7102268	7104668	MACS_peak_5432	114.64
chr15	7410056	7410670	MACS_peak_5440	53.63
chr15	11010889	11012551	MACS_peak_5479	137.65
chr15	13898701	13899911	MACS_peak_5504	99.25
chr15	14371108	14373252	MACS_peak_5520	124.56
chr15	14501916	14502777	MACS_peak_5524	75.56
chr15	14822350	14823378	MACS_peak_5532	77.25
chr15	15929409	15930943	MACS_peak_5550	64.13
chr15	16939109	16940357	MACS_peak_5566	59.23
chr15	17234414	17236413	MACS_peak_5578	59.94
chr15	17271162	17272425	MACS_peak_5579	68.25
chr15	18071555	18072569	MACS_peak_5587	114.41
chr15	18972903	18975776	MACS_peak_5597	62.95
chr15	19823643	19825450	MACS_peak_5620	99.14
chr15	20332817	20334647	MACS_peak_5625	67.51
chr15	20368706	20370417	MACS_peak_5628	71.34
chr15	20611266	20612595	MACS_peak_5629	62.91
chr15	20839368	20840131	MACS_peak_5637	53.51
chr15	21283927	21284703	MACS_peak_5642	64.27
chr15	21458076	21458709	MACS_peak_5650	55.49
chr15	22849170	22850657	MACS_peak_5667	143.18
chr15	22929497	22931096	MACS_peak_5672	128.53
chr15	22976634	22977597	MACS_peak_5674	80.66
chr15	23083560	23084639	MACS_peak_5679	79.14
chr15	24006790	24008933	MACS_peak_5694	54.25
chr15	24237126	24238053	MACS_peak_5702	73.32
chr15	24260932	24262198	MACS_peak_5703	73.66
chr15	24266996	24268283	MACS_peak_5704	61.01
chr15	24283260	24284593	MACS_peak_5706	115.87
chr15	24472238	24473387	MACS_peak_5710	145.11
chr15	24491262	24493984	MACS_peak_5711	314.24
chr15	24842343	24844526	MACS_peak_5720	247.29
chr15	24864552	24865945	MACS_peak_5724	79.81
chr15	26184315	26186211	MACS_peak_5735	121.21
chr15	26447935	26448789	MACS_peak_5740	53.29
chr15	27531158	27532616	MACS_peak_5750	90.77
chr15	27724677	27726940	MACS_peak_5757	103.57
chr15	27801250	27802102	MACS_peak_5760	74.59
chr15	28047287	28049243	MACS_peak_5770	139.35
chr15	28082838	28085517	MACS_peak_5775	150.51
chr15	28730492	28732059	MACS_peak_5793	65.03
chr15	28991667	28992930	MACS_peak_5799	62.33
chr15	29049442	29050787	MACS_peak_5802	77.05
chr15	30145228	30146237	MACS_peak_5814	51.89
chr15	30621482	30623873	MACS_peak_5825	211.42
chr15	32948441	32950377	MACS_peak_5853	151.73
chr15	33153970	33155464	MACS_peak_5859	64.72
chr15	33159502	33161503	MACS_peak_5860	120.16
chr15	34267694	34268899	MACS_peak_5874	79.21
chr15	34597840	34598836	MACS_peak_5884	60.82
chr15	35481128	35481990	MACS_peak_5894	85.53
chr15	36045990	36047502	MACS_peak_5898	191.25
chr15	36934295	36935932	MACS_peak_5906	97.08
chr15	38765826	38767721	MACS_peak_5922	72.59
chr15	40788909	40789591	MACS_peak_5943	61.38
chr15	43703515	43704386	MACS_peak_5968	76.89
chr15	45929928	45931607	MACS_peak_5996	173.86
chr16	723376	723976	MACS_peak_6025	54.93
chr16	1384673	1386419	MACS_peak_6034	50.57
chr16	4985281	4985866	MACS_peak_6054	50.23
chr16	5109787	5111122	MACS_peak_6058	150.57
chr16	6802528	6803455	MACS_peak_6091	55.72
chr16	6836826	6838342	MACS_peak_6092	233.71
chr16	6944878	6945569	MACS_peak_6096	62.23
chr16	8459818	8460341	MACS_peak_6123	62.82
chr16	8949057	8952054	MACS_peak_6128	155.95
chr16	9253544	9257583	MACS_peak_6135	294.74
chr16	10000852	10001795	MACS_peak_6148	73.14
chr16	11088422	11089710	MACS_peak_6155	187.29
chr16	12053503	12054149	MACS_peak_6171	56.75
chr16	12715112	12716296	MACS_peak_6181	132.35
chr16	12944315	12945648	MACS_peak_6187	285.27
chr16	13989169	13990234	MACS_peak_6200	54.9
chr16	15297921	15300619	MACS_peak_6214	63.98
chr16	15473168	15473876	MACS_peak_6220	76.76
chr16	18423197	18424449	MACS_peak_6250	63.83
chr16	18462495	18463295	MACS_peak_6251	83.93
chr16	18566413	18567334	MACS_peak_6253	62.53
chr16	18763715	18768627	MACS_peak_6255	103.57
chr16	18899147	18901568	MACS_peak_6257	206.56
chr16	18927256	18928751	MACS_peak_6259	64.08
chr16	19407901	19410460	MACS_peak_6267	83.34
chr16	19682993	19685054	MACS_peak_6271	177.66
chr16	19692047	19692724	MACS_peak_6272	55.96
chr16	21107484	21108301	MACS_peak_6284	52.17
chr16	21375549	21377674	MACS_peak_6288	150.29
chr16	21947447	21949333	MACS_peak_6294	51.26
chr16	22986766	22993508	MACS_peak_6307	57.75
chr16	23090669	23091364	MACS_peak_6310	53.15
chr16	23811718	23812439	MACS_peak_6324	66.01
chr16	23831290	23833486	MACS_peak_6326	104.34
chr16	25564063	25567596	MACS_peak_6354	180.07
chr16	26926795	26929722	MACS_peak_6381	80.58
chr16	27677416	27678572	MACS_peak_6407	51.38
chr16	28444273	28446805	MACS_peak_6423	157.47
chr16	28900958	28902787	MACS_peak_6432	74.02
chr16	28926868	28928372	MACS_peak_6433	65.55
chr16	28937345	28939274	MACS_peak_6435	105.26
chr16	29628462	29629087	MACS_peak_6452	58.05
chr16	31136306	31136994	MACS_peak_6468	57.53
chr16	31321713	31323010	MACS_peak_6473	68.15
chr16	31333883	31336199	MACS_peak_6474	50.08
chr16	31776548	31777719	MACS_peak_6482	55.06
chr16	31810151	31811891	MACS_peak_6484	65.35
chr16	31904344	31905474	MACS_peak_6490	62.73
chr16	31908210	31910307	MACS_peak_6491	129.95
chr16	32801633	32802465	MACS_peak_6506	72.65
chr16	32840615	32844969	MACS_peak_6507	73.85
chr16	34460294	34461505	MACS_peak_6538	86
chr16	34627382	34628394	MACS_peak_6544	59.33
chr16	34683526	34685713	MACS_peak_6545	151.06
chr16	34791090	34792475	MACS_peak_6547	75.48
chr16	34810983	34811560	MACS_peak_6548	52.43
chr16	34860119	34862118	MACS_peak_6552	100.6
chr16	35061424	35062488	MACS_peak_6557	93.74
chr16	35635996	35637484	MACS_peak_6563	78.35
chr16	36505806	36506827	MACS_peak_6585	94
chr16	39611775	39612983	MACS_peak_6616	97.91
chr16	39773095	39774154	MACS_peak_6618	60.55
chr16	39900219	39901505	MACS_peak_6622	82.31
chr16	41364093	41364862	MACS_peak_6646	59.49
chr16	41615182	41616584	MACS_peak_6649	71.12
chr16	41646425	41647528	MACS_peak_6650	99.89
chr16	41687331	41688546	MACS_peak_6651	92.76
chr16	42079244	42081446	MACS_peak_6658	122.57
chr16	42192114	42193631	MACS_peak_6660	185.49
chr16	42348859	42349869	MACS_peak_6666	71.93
chr16	43605708	43606708	MACS_peak_6682	90.19
chr16	44777650	44779063	MACS_peak_6706	88.36
chr16	44879206	44882182	MACS_peak_6709	147.46
chr16	45074500	45075181	MACS_peak_6713	78.7
chr16	45586487	45587430	MACS_peak_6724	87.67
chr16	45774821	45776829	MACS_peak_6731	102.72
chr16	46860599	46861402	MACS_peak_6745	53.58
chr16	47691311	47695299	MACS_peak_6749	159.19
chr16	51947284	51948841	MACS_peak_6797	135.97
chr16	52005067	52005925	MACS_peak_6799	67.6
chr16	52676299	52676877	MACS_peak_6804	50.87
chr16	54688331	54689965	MACS_peak_6817	100.89
chr16	55375127	55375831	MACS_peak_6840	65.98
chr16	56346347	56347899	MACS_peak_6850	78.91
chr16	56720097	56720761	MACS_peak_6856	67.45
chr16	57001762	57003876	MACS_peak_6861	192.03
chr17	1033280	1034809	MACS_peak_6909	155.68
chr17	2284060	2286053	MACS_peak_6922	91.38
chr17	7442309	7443651	MACS_peak_6954	101.22
chr17	10064435	10065304	MACS_peak_6993	81.04
chr17	12304467	12305535	MACS_peak_7024	52.58
chr17	12653384	12654653	MACS_peak_7033	67.19
chr17	12863189	12865532	MACS_peak_7038	115.82
chr17	15557610	15559246	MACS_peak_7074	60.26
chr17	15618697	15619529	MACS_peak_7075	64.51
chr17	17802693	17805135	MACS_peak_7105	51.75
chr17	17964544	17966600	MACS_peak_7109	158.06
chr17	18147938	18148716	MACS_peak_7110	68.17
chr17	18320801	18321712	MACS_peak_7111	72.71
chr17	20961163	20962261	MACS_peak_7133	87.94
chr17	22518263	22520111	MACS_peak_7156	104.64
chr17	23776362	23777992	MACS_peak_7181	122.76
chr17	24075162	24075827	MACS_peak_7190	52.49
chr17	24137291	24139043	MACS_peak_7192	133.01
chr17	24320266	24322143	MACS_peak_7199	111.98
chr17	25076656	25077667	MACS_peak_7217	53.87
chr17	25363166	25365056	MACS_peak_7226	70.08
chr17	25690662	25691821	MACS_peak_7233	90.59
chr17	26390971	26391691	MACS_peak_7239	61.05
chr17	26472259	26472829	MACS_peak_7244	64.31
chr17	26605061	26606495	MACS_peak_7247	102.87
chr17	26618081	26619210	MACS_peak_7248	74.4
chr17	27040794	27042491	MACS_peak_7261	77.35
chr17	27094721	27098068	MACS_peak_7264	79.2
chr17	27225870	27227299	MACS_peak_7267	113.29
chr17	27437040	27438023	MACS_peak_7271	71.85
chr17	27698021	27699147	MACS_peak_7274	63.51
chr17	28165792	28166851	MACS_peak_7283	84.58
chr17	28779410	28782001	MACS_peak_7291	80.68
chr17	28899242	28899958	MACS_peak_7295	68.58
chr17	29399907	29400763	MACS_peak_7303	52.46
chr17	29939647	29941266	MACS_peak_7307	132.28
chr17	30387880	30389591	MACS_peak_7308	120.92
chr17	31164713	31165461	MACS_peak_7323	56.8
chr17	33048421	33050728	MACS_peak_7361	99.83
chr17	33579856	33580678	MACS_peak_7372	57.58
chr17	34385646	34387220	MACS_peak_7390	68.6
chr17	34563235	34567091	MACS_peak_7393	70.36
chr17	34630766	34632265	MACS_peak_7394	117.72
chr17	34681296	34682393	MACS_peak_7395	54.39
chr17	34690747	34691560	MACS_peak_7396	59.85
chr17	35061535	35062305	MACS_peak_7402	85.52
chr17	35821015	35822150	MACS_peak_7418	59.03
chr17	36128190	36129588	MACS_peak_7429	180.46
chr17	36145795	36147618	MACS_peak_7430	129.95
chr17	36360863	36361634	MACS_peak_7434	58.73
chr17	36398454	36400581	MACS_peak_7435	90.78
chr17	36835725	36836444	MACS_peak_7439	56.23
chr17	37425652	37427314	MACS_peak_7449	85.95
chr17	37510714	37511575	MACS_peak_7453	60.28
chr17	37897150	37900482	MACS_peak_7463	147.88
chr17	37907170	37909609	MACS_peak_7464	56.33
chr17	38075015	38077445	MACS_peak_7472	107.17
chr17	38082842	38084432	MACS_peak_7473	163.76
chr17	38231640	38232972	MACS_peak_7478	50.69
chr17	38336864	38338008	MACS_peak_7479	80.01
chr17	38529727	38530691	MACS_peak_7481	80.34
chr17	38557769	38558527	MACS_peak_7482	60.43
chr17	38692983	38693685	MACS_peak_7486	63.14
chr17	38737308	38738592	MACS_peak_7487	60.48
chr17	38806784	38808205	MACS_peak_7492	66.96
chr17	39409768	39410348	MACS_peak_7497	50.69
chr17	41411510	41412768	MACS_peak_7510	130.4
chr17	41597276	41597822	MACS_peak_7514	66.97
chr17	42849334	42850160	MACS_peak_7522	63.56
chr17	44469102	44469731	MACS_peak_7545	52.32
chr17	45821824	45822731	MACS_peak_7559	69.21
chr17	45992418	45992865	MACS_peak_7567	72.19
chr17	46095698	46097011	MACS_peak_7572	70.07
chr17	51282307	51283254	MACS_peak_7621	57
chr17	51989572	51990184	MACS_peak_7625	51.68
chr17	53022040	53022839	MACS_peak_7643	58.86
chr17	53430900	53434500	MACS_peak_7650	302.71
chr17	53449841	53450937	MACS_peak_7651	51.7
chr18	1733710	1735858	MACS_peak_7681	78.82
chr18	2508533	2509725	MACS_peak_7695	134.63
chr18	4575651	4576207	MACS_peak_7707	52.93
chr18	5187201	5189330	MACS_peak_7721	210.07
chr18	5201045	5202341	MACS_peak_7722	101.8
chr18	8679608	8681582	MACS_peak_7754	118.28
chr18	11578259	11579252	MACS_peak_7773	78.84
chr18	12537255	12538408	MACS_peak_7792	64.84
chr18	12659879	12660918	MACS_peak_7796	104.95
chr18	14296343	14297341	MACS_peak_7814	57.13
chr18	14304767	14305593	MACS_peak_7815	50.85
chr18	14479719	14480259	MACS_peak_7821	60.95
chr18	14773836	14775067	MACS_peak_7828	61.58
chr18	14903505	14904778	MACS_peak_7832	107.88
chr18	15426976	15427756	MACS_peak_7844	50.87
chr18	15483041	15483581	MACS_peak_7847	54.49
chr18	15601949	15602635	MACS_peak_7849	53.22
chr18	17038037	17039009	MACS_peak_7866	88.65
chr18	17348025	17349422	MACS_peak_7871	91.83
chr18	17489268	17491544	MACS_peak_7878	120.92
chr18	17558579	17559689	MACS_peak_7882	81.79
chr18	17587571	17589575	MACS_peak_7883	98.47
chr18	18849228	18850383	MACS_peak_7909	89.32
chr18	18866062	18866940	MACS_peak_7910	54.92
chr18	19333673	19334665	MACS_peak_7919	56.97
chr18	19407065	19408793	MACS_peak_7921	63.21
chr18	19412800	19415250	MACS_peak_7922	61.21
chr18	19465679	19466844	MACS_peak_7925	94.49
chr18	19535461	19536672	MACS_peak_7930	82.86
chr18	19546629	19548115	MACS_peak_7931	86.29
chr18	19900601	19902115	MACS_peak_7943	95.88
chr18	19922566	19924169	MACS_peak_7944	50.77
chr18	19956616	19958334	MACS_peak_7945	149.47
chr18	19964728	19967531	MACS_peak_7946	118.37
chr18	20052003	20055140	MACS_peak_7951	185.27
chr18	20167549	20169038	MACS_peak_7958	65.07
chr18	20180578	20185381	MACS_peak_7959	146.8
chr18	20734637	20736499	MACS_peak_7969	177.8
chr18	21923387	21924644	MACS_peak_7990	71.67
chr18	22785531	22787014	MACS_peak_8007	130.52
chr18	23109313	23110377	MACS_peak_8013	58.38
chr18	23575124	23575970	MACS_peak_8017	51.29
chr18	23598511	23599705	MACS_peak_8019	66.43
chr18	23634592	23635369	MACS_peak_8020	50.91
chr18	23657595	23659970	MACS_peak_8022	338.23
chr18	23688354	23689887	MACS_peak_8024	52.09
chr18	23710828	23712495	MACS_peak_8025	64.76
chr18	23731774	23732992	MACS_peak_8026	85.88
chr18	23785833	23787494	MACS_peak_8028	88.66
chr18	23880609	23882847	MACS_peak_8035	113.9
chr18	23976101	23976921	MACS_peak_8037	70.14
chr18	24117522	24118674	MACS_peak_8040	84.79
chr18	24258779	24259326	MACS_peak_8043	52.47
chr18	24409359	24409998	MACS_peak_8047	61.19
chr18	24552243	24553458	MACS_peak_8049	80.91
chr18	25389714	25391245	MACS_peak_8061	76.55
chr18	25392875	25394347	MACS_peak_8062	81.6
chr18	25442496	25445140	MACS_peak_8067	127.55
chr18	25997248	25998493	MACS_peak_8084	105.12
chr18	26900590	26901932	MACS_peak_8095	143.07
chr18	27160321	27160921	MACS_peak_8102	58.08
chr18	29975276	29976934	MACS_peak_8120	224.11
chr18	32971386	32972188	MACS_peak_8162	55.11
chr18	33262619	33264343	MACS_peak_8172	106.37
chr18	34050470	34051793	MACS_peak_8179	86.18
chr18	34982387	34984745	MACS_peak_8187	102.11
chr18	35011364	35012409	MACS_peak_8188	94.15
chr18	35100982	35102505	MACS_peak_8189	169.02
chr18	37417629	37418466	MACS_peak_8222	59.97
chr18	38451453	38452161	MACS_peak_8234	61.41
chr18	38526640	38527667	MACS_peak_8235	68.96
chr18	38675729	38677853	MACS_peak_8241	136.84
chr18	39098746	39100047	MACS_peak_8247	208
chr18	41230213	41230860	MACS_peak_8271	50.73
chr18	41446298	41448068	MACS_peak_8273	204.59
chr18	41495637	41496455	MACS_peak_8276	60.74
chr18	41551395	41553351	MACS_peak_8277	52.74
chr18	41553498	41554984	MACS_peak_8278	76.66
chr18	41615897	41618006	MACS_peak_8279	159.24
chr18	42468566	42469810	MACS_peak_8291	63.96
chr18	42515041	42517834	MACS_peak_8292	63.51
chr18	42849915	42851340	MACS_peak_8299	89.76
chr18	44382784	44383382	MACS_peak_8335	67.88
chr18	45107825	45109462	MACS_peak_8348	183.64
chr18	46835021	46836022	MACS_peak_8354	76.97
chr18	48810111	48810961	MACS_peak_8381	56.42
chr19	143701	145295	MACS_peak_8399	77.18
chr19	986790	987645	MACS_peak_8420	67.86
chr19	2088866	2090348	MACS_peak_8435	128.12
chr19	2251750	2252368	MACS_peak_8441	52.64
chr19	2454252	2455810	MACS_peak_8447	51.19
chr19	3628104	3631701	MACS_peak_8466	150.03
chr19	4496256	4498319	MACS_peak_8478	154.77
chr19	4890118	4891077	MACS_peak_8488	83.23
chr19	6864934	6865594	MACS_peak_8516	67.85
chr19	6886456	6887220	MACS_peak_8517	59.69
chr19	6904184	6904873	MACS_peak_8518	71.29
chr19	7393338	7395715	MACS_peak_8522	59
chr19	7404691	7408947	MACS_peak_8524	70.34
chr19	8935211	8936053	MACS_peak_8556	73.07
chr19	8993305	8995100	MACS_peak_8557	155.58
chr19	9443484	9444452	MACS_peak_8569	98.12
chr19	10277618	10278320	MACS_peak_8589	62.09
chr19	11475720	11477149	MACS_peak_8602	147.79
chr19	11497981	11499249	MACS_peak_8603	73.63
chr19	11668056	11669029	MACS_peak_8606	98.8
chr19	11969774	11971601	MACS_peak_8614	132.23
chr19	12026622	12027766	MACS_peak_8617	78.26
chr19	13567741	13568386	MACS_peak_8643	56.84
chr19	15027924	15029804	MACS_peak_8659	203.09
chr19	16589885	16590745	MACS_peak_8684	79.64
chr19	17329880	17331638	MACS_peak_8697	102.43
chr19	19653074	19654704	MACS_peak_8728	116.3
chr19	20253562	20254795	MACS_peak_8734	106.68
chr19	21869776	21873196	MACS_peak_8760	100.25
chr19	21878977	21880462	MACS_peak_8761	79.21
chr19	22181361	22182127	MACS_peak_8763	58.3
chr19	22589902	22590708	MACS_peak_8771	50.49
chr19	22605856	22606889	MACS_peak_8772	86.47
chr19	22715645	22716581	MACS_peak_8775	84.64
chr19	23712836	23714611	MACS_peak_8794	148.76
chr19	24891042	24891995	MACS_peak_8810	96.22
chr19	25407280	25408485	MACS_peak_8817	97.56
chr19	25864177	25865445	MACS_peak_8823	81.82
chr19	25980079	25980768	MACS_peak_8827	52.97
chr19	26548512	26550212	MACS_peak_8853	109.02
chr19	26700298	26701445	MACS_peak_8856	74.21
chr19	27313416	27314630	MACS_peak_8865	61.68
chr19	30723023	30724495	MACS_peak_8918	416.47
chr19	30827128	30827926	MACS_peak_8921	60.6
chr19	31907546	31908742	MACS_peak_8944	53.58
chr19	31917854	31919085	MACS_peak_8945	85.73
chr19	32279859	32281265	MACS_peak_8960	91.07
chr19	32295604	32296475	MACS_peak_8961	60.79
chr19	32671839	32672413	MACS_peak_8968	51.23
chr19	32996238	32997956	MACS_peak_8974	142.86
chr19	33784073	33785036	MACS_peak_8987	53.29
chr19	33899211	33900291	MACS_peak_8991	79.68
chr19	34419254	34420029	MACS_peak_9003	63.9
chr19	34909764	34911190	MACS_peak_9011	99.23
chr19	35753339	35754275	MACS_peak_9019	60.29
chr19	36299310	36300548	MACS_peak_9023	84.81
chr19	36370142	36371083	MACS_peak_9025	57.82
chr19	36416442	36418110	MACS_peak_9026	59.59
chr19	36511704	36512876	MACS_peak_9028	67.66
chr19	36651554	36654402	MACS_peak_9034	68.63
chr19	37793788	37796629	MACS_peak_9049	149.12
chr19	39162088	39163227	MACS_peak_9059	66.59
chr19	39871862	39873075	MACS_peak_9061	84.15
chr19	41926484	41927759	MACS_peak_9083	57.45
chr19	42464863	42467182	MACS_peak_9091	116.97
chr19	44334927	44335606	MACS_peak_9125	51.6
chr19	44719834	44721840	MACS_peak_9137	210.19
chr19	44922227	44923560	MACS_peak_9144	71.68
chr19	45123031	45124715	MACS_peak_9150	65.77
chr19	45449166	45450076	MACS_peak_9159	71.11
chr19	46902017	46902946	MACS_peak_9166	56.85
chr19	47753050	47753893	MACS_peak_9182	55.67
chr19	49300301	49301455	MACS_peak_9203	170.27
chr19	49375315	49377128	MACS_peak_9206	92.72
chr2	544814	546236	MACS_peak_9247	58.2
chr2	1070280	1071037	MACS_peak_9250	77.11
chr2	1079328	1079922	MACS_peak_9251	61.79
chr2	3451490	3453428	MACS_peak_9284	112.6
chr2	3580025	3580892	MACS_peak_9289	67.4
chr2	3696966	3697983	MACS_peak_9292	69.41
chr2	4257538	4259150	MACS_peak_9301	108.47
chr2	6799270	6799955	MACS_peak_9334	119.45
chr2	6902786	6904098	MACS_peak_9337	84.07
chr2	7738819	7740050	MACS_peak_9346	71.86
chr2	9399620	9401302	MACS_peak_9361	232.13
chr2	10153482	10156167	MACS_peak_9383	206.95
chr2	10773187	10774473	MACS_peak_9394	71.28
chr2	10874881	10875925	MACS_peak_9399	102.01
chr2	11483659	11487068	MACS_peak_9406	100.45
chr2	11567108	11568817	MACS_peak_9411	225.19
chr2	12072610	12074448	MACS_peak_9417	135.5
chr2	15042714	15044139	MACS_peak_9444	78.43
chr2	15071109	15072270	MACS_peak_9445	51.55
chr2	15286724	15288187	MACS_peak_9446	52.36
chr2	16367816	16369712	MACS_peak_9461	109.08
chr2	16477327	16478239	MACS_peak_9465	50.54
chr2	17751357	17753195	MACS_peak_9475	237.21
chr2	19277810	19279221	MACS_peak_9485	93.14
chr2	20703168	20704463	MACS_peak_9497	69.25
chr2	21343182	21344464	MACS_peak_9515	52.93
chr2	21585931	21588351	MACS_peak_9522	104.04
chr2	21602359	21607169	MACS_peak_9523	324.13
chr2	21627396	21628582	MACS_peak_9526	83.81
chr2	21762678	21764186	MACS_peak_9531	57.71
chr2	22045037	22046868	MACS_peak_9539	60.13
chr2	22046874	22048141	MACS_peak_9540	214.27
chr2	22058728	22060119	MACS_peak_9541	72.72
chr2	22313161	22314279	MACS_peak_9548	54.35
chr2	22631354	22632286	MACS_peak_9559	67.48
chr2	25392173	25394138	MACS_peak_9607	53.55
chr2	25396816	25399625	MACS_peak_9608	140.13
chr2	25562323	25563172	MACS_peak_9615	92.95
chr2	25725870	25726760	MACS_peak_9620	68.67
chr2	25904565	25905605	MACS_peak_9623	97.3
chr2	25947941	25950010	MACS_peak_9624	111.56
chr2	27542754	27543781	MACS_peak_9652	112.96
chr2	27929325	27930490	MACS_peak_9662	72.03
chr2	28279531	28281174	MACS_peak_9664	94.22
chr2	29598992	29601027	MACS_peak_9669	58.05
chr2	31134145	31136397	MACS_peak_9693	129.58
chr2	31848146	31850072	MACS_peak_9707	148.9
chr2	31959083	31960153	MACS_peak_9712	155.04
chr2	32268524	32269715	MACS_peak_9720	76.65
chr2	32733746	32734401	MACS_peak_9730	55.93
chr2	32825034	32829168	MACS_peak_9733	60.27
chr2	33069639	33070834	MACS_peak_9737	59.42
chr2	33678460	33680269	MACS_peak_9749	54.22
chr2	33689869	33694267	MACS_peak_9750	60.99
chr2	33729869	33731306	MACS_peak_9751	70.74
chr2	33796674	33799031	MACS_peak_9755	194.82
chr2	35415562	35417597	MACS_peak_9772	169.06
chr2	35666629	35668067	MACS_peak_9784	59.81
chr2	37451561	37452358	MACS_peak_9811	58.08
chr2	37748630	37749772	MACS_peak_9824	132.2
chr2	37984216	37985126	MACS_peak_9835	78.33
chr2	39791452	39793282	MACS_peak_9858	94.66
chr2	40231107	40231702	MACS_peak_9863	68.21
chr2	40914809	40915800	MACS_peak_9870	58.49
chr2	41967482	41969981	MACS_peak_9883	146.62
chr2	42559610	42560837	MACS_peak_9895	105.83
chr2	42822244	42823142	MACS_peak_9904	57.03
chr2	43574517	43575658	MACS_peak_9912	69.44
chr2	43672873	43673869	MACS_peak_9917	62.65
chr2	44294948	44296261	MACS_peak_9930	77.48
chr2	44659672	44660697	MACS_peak_9938	68.56
chr2	45120739	45121712	MACS_peak_9946	83.3
chr2	47556819	47558034	MACS_peak_9964	115.51
chr2	47601949	47603970	MACS_peak_9967	120.36
chr2	49331096	49331985	MACS_peak_9985	76.73
chr2	50049227	50050035	MACS_peak_9996	66.99
chr2	50178535	50179899	MACS_peak_9998	209.31
chr2	53053901	53054938	MACS_peak_10020	136.15
chr2	56003343	56005292	MACS_peak_10041	142.36
chr2	59591927	59592525	MACS_peak_10088	61.38
chr20	473178	474898	MACS_peak_10113	138.62
chr20	880557	882542	MACS_peak_10123	118.41
chr20	5214725	5216918	MACS_peak_10187	115.59
chr20	9735557	9738153	MACS_peak_10227	147.99
chr20	9783542	9785706	MACS_peak_10231	120.52
chr20	11371603	11373484	MACS_peak_10244	151.96
chr20	13505237	13506423	MACS_peak_10259	68.01
chr20	14646775	14648275	MACS_peak_10265	83.62
chr20	14784172	14785121	MACS_peak_10273	55.7
chr20	15127115	15129122	MACS_peak_10280	126.34
chr20	15313246	15314659	MACS_peak_10284	70.22
chr20	16150863	16152424	MACS_peak_10294	95.25
chr20	16998167	16999864	MACS_peak_10310	58.67
chr20	18115088	18116291	MACS_peak_10321	91.81
chr20	19627998	19630419	MACS_peak_10337	63.39
chr20	20455371	20457266	MACS_peak_10351	304.83
chr20	20594538	20595593	MACS_peak_10358	79.13
chr20	21331210	21332744	MACS_peak_10366	72.56
chr20	21530533	21532131	MACS_peak_10370	54.08
chr20	21939208	21940488	MACS_peak_10377	113.91
chr20	22052572	22053911	MACS_peak_10381	51.29
chr20	22185177	22186578	MACS_peak_10383	146.86
chr20	22699272	22700004	MACS_peak_10391	85.77
chr20	23585648	23588805	MACS_peak_10411	68.42
chr20	23604123	23604864	MACS_peak_10413	65.31
chr20	24405986	24406744	MACS_peak_10433	59.91
chr20	24642950	24643610	MACS_peak_10434	55.49
chr20	24967576	24969410	MACS_peak_10436	86.39
chr20	24970189	24971802	MACS_peak_10437	63.39
chr20	25563455	25564784	MACS_peak_10445	90.58
chr20	26286245	26287076	MACS_peak_10463	58.39
chr20	26537288	26539317	MACS_peak_10472	80.05
chr20	26853305	26854567	MACS_peak_10478	69.99
chr20	27032908	27033939	MACS_peak_10488	90.03
chr20	27146376	27147377	MACS_peak_10492	115.51
chr20	28257420	28258703	MACS_peak_10506	50.6
chr20	28396142	28396966	MACS_peak_10511	67.3
chr20	28481449	28482531	MACS_peak_10517	133.48
chr20	28490388	28491667	MACS_peak_10518	79.46
chr20	28935787	28939029	MACS_peak_10525	177.98
chr20	29414684	29416301	MACS_peak_10534	162.07
chr20	29420987	29421973	MACS_peak_10535	62.95
chr20	29429843	29430938	MACS_peak_10536	76.43
chr20	29645430	29646434	MACS_peak_10545	57.23
chr20	29751035	29751814	MACS_peak_10551	83.29
chr20	29920778	29921594	MACS_peak_10554	62.86
chr20	30888755	30892103	MACS_peak_10575	193.14
chr20	31410938	31412733	MACS_peak_10584	286.89
chr20	32330259	32332903	MACS_peak_10598	210.78
chr20	32350748	32352106	MACS_peak_10600	56.95
chr20	32451227	32452737	MACS_peak_10604	76.36
chr20	32457821	32458764	MACS_peak_10605	58.1
chr20	33229459	33230852	MACS_peak_10611	79.03
chr20	33251062	33253625	MACS_peak_10612	80.52
chr20	33360857	33362295	MACS_peak_10618	99.13
chr20	33393851	33396025	MACS_peak_10621	84.56
chr20	33719597	33721842	MACS_peak_10628	159.17
chr20	34274137	34275514	MACS_peak_10638	69.46
chr20	34434446	34435197	MACS_peak_10643	55.06
chr20	34493199	34494406	MACS_peak_10645	102.43
chr20	35176630	35177759	MACS_peak_10661	71.2
chr20	35686000	35686773	MACS_peak_10670	92.95
chr20	36753922	36754847	MACS_peak_10684	60.76
chr20	39289631	39290245	MACS_peak_10729	53.63
chr20	42700406	42701256	MACS_peak_10771	86.75
chr20	43410024	43411173	MACS_peak_10782	75.23
chr20	45168903	45169749	MACS_peak_10794	56.78
chr20	45184974	45185842	MACS_peak_10795	92.04
chr20	45883946	45885317	MACS_peak_10799	181.69
chr20	46379327	46380366	MACS_peak_10803	95.52
chr20	46508823	46509657	MACS_peak_10805	75.79
chr20	46607001	46607944	MACS_peak_10806	102.85
chr20	48820065	48821117	MACS_peak_10840	111.07
chr20	50195606	50197911	MACS_peak_10856	116.5
chr20	51856069	51858917	MACS_peak_10872	421.87
chr20	52617760	52618498	MACS_peak_10883	73.12
chr20	55104010	55104752	MACS_peak_10928	66.68
chr20	55139957	55140598	MACS_peak_10929	64.62
chr21	913482	914221	MACS_peak_10959	84.3
chr21	1545010	1545582	MACS_peak_10966	57.64
chr21	3651098	3652709	MACS_peak_10998	214.09
chr21	5994239	5995724	MACS_peak_11052	62.6
chr21	9324741	9328157	MACS_peak_11094	731.97
chr21	9340299	9341080	MACS_peak_11095	86.61
chr21	10167293	10168827	MACS_peak_11104	59.36
chr21	12049913	12050804	MACS_peak_11133	63.43
chr21	12157192	12157963	MACS_peak_11137	60.4
chr21	14015561	14016395	MACS_peak_11157	59.32
chr21	15830559	15832837	MACS_peak_11176	148.04
chr21	16541210	16541827	MACS_peak_11188	58.01
chr21	17943653	17945205	MACS_peak_11196	51.77
chr21	19723288	19724052	MACS_peak_11235	66.3
chr21	19854435	19859485	MACS_peak_11238	62.15
chr21	20520493	20521702	MACS_peak_11252	110.77
chr21	22455251	22459415	MACS_peak_11283	168.19
chr21	22505927	22507626	MACS_peak_11285	66.28
chr21	22523605	22527939	MACS_peak_11286	98.83
chr21	23831355	23832629	MACS_peak_11307	62.11
chr21	24298381	24299356	MACS_peak_11313	60.6
chr21	24536897	24537566	MACS_peak_11320	60.71
chr21	24737381	24738541	MACS_peak_11325	50.97
chr21	26023111	26024492	MACS_peak_11355	113.86
chr21	26043440	26044129	MACS_peak_11356	64.98
chr21	26140547	26141871	MACS_peak_11362	52.95
chr21	26786173	26787353	MACS_peak_11374	71.75
chr21	26940307	26941598	MACS_peak_11376	126.29
chr21	28076911	28078167	MACS_peak_11382	148.66
chr21	28181811	28184188	MACS_peak_11387	81.53
chr21	28797354	28800762	MACS_peak_11399	109.66
chr21	28843783	28844953	MACS_peak_11403	62.9
chr21	29942303	29943325	MACS_peak_11423	166.3
chr21	29960888	29963240	MACS_peak_11425	88.48
chr21	34384405	34387600	MACS_peak_11469	100.64
chr21	35490348	35492197	MACS_peak_11481	103.52
chr21	36122058	36123421	MACS_peak_11490	102.91
chr21	36148466	36149060	MACS_peak_11491	55.49
chr21	36448297	36450414	MACS_peak_11497	80.47
chr21	36502812	36503626	MACS_peak_11499	50.61
chr21	36511471	36513898	MACS_peak_11500	94.71
chr21	36667610	36669868	MACS_peak_11509	185.38
chr21	37035117	37037318	MACS_peak_11523	122.16
chr21	37067059	37068048	MACS_peak_11525	131.93
chr21	37387534	37388659	MACS_peak_11529	59.58
chr21	38894311	38895534	MACS_peak_11552	82.82
chr21	39743504	39744158	MACS_peak_11563	57.29
chr21	40046782	40049118	MACS_peak_11568	145.91
chr21	42448754	42451615	MACS_peak_11607	141.19
chr21	43232612	43234225	MACS_peak_11615	107.02
chr22	3651726	3653509	MACS_peak_11777	81.61
chr22	4187473	4189078	MACS_peak_11785	118.09
chr22	4212275	4214039	MACS_peak_11787	116.78
chr22	4639105	4640956	MACS_peak_11798	81.72
chr22	6691104	6691589	MACS_peak_11825	60.35
chr22	10632898	10635344	MACS_peak_11861	111.34
chr22	10750005	10750975	MACS_peak_11865	73.91
chr22	11269957	11271685	MACS_peak_11883	52.55
chr22	11455158	11455990	MACS_peak_11892	69.82
chr22	15588467	15589814	MACS_peak_11952	53.95
chr22	16247164	16248467	MACS_peak_11971	99.85
chr22	16683583	16686605	MACS_peak_11985	122.77
chr22	17272671	17274877	MACS_peak_11997	109.57
chr22	18582253	18583643	MACS_peak_12019	399.46
chr22	18812873	18814280	MACS_peak_12027	87.72
chr22	18953150	18957333	MACS_peak_12033	164.29
chr22	19979368	19981228	MACS_peak_12046	233.65
chr22	20680370	20681489	MACS_peak_12052	100.74
chr22	20696903	20699494	MACS_peak_12053	94.31
chr22	21286698	21288497	MACS_peak_12062	64.15
chr22	21328272	21330971	MACS_peak_12063	124.36
chr22	21629049	21630352	MACS_peak_12073	137.64
chr22	21788673	21791821	MACS_peak_12077	91.98
chr22	23390936	23391481	MACS_peak_12096	51.17
chr22	24969011	24969984	MACS_peak_12110	88.38
chr22	25616844	25617597	MACS_peak_12119	84.79
chr22	26910554	26911814	MACS_peak_12129	87.93
chr22	26933411	26934334	MACS_peak_12130	55.49
chr22	32390278	32391260	MACS_peak_12166	99.37
chr22	33027937	33029898	MACS_peak_12187	67.99
chr22	33151419	33153788	MACS_peak_12191	186.57
chr22	34878443	34879259	MACS_peak_12202	66.78
chr22	35990576	35994098	MACS_peak_12223	150.67
chr22	38657902	38659479	MACS_peak_12246	165.06
chr22	39472821	39473589	MACS_peak_12260	51.99
chr22	40199758	40200379	MACS_peak_12270	54.58
chr22	40294125	40296421	MACS_peak_12274	141.62
chr22	40498874	40499545	MACS_peak_12283	66.86
chr23	45493	47048	MACS_peak_12321	99.97
chr23	341357	342664	MACS_peak_12331	72.89
chr23	944743	945798	MACS_peak_12339	64.61
chr23	1218108	1220937	MACS_peak_12350	108.54
chr23	1741687	1742694	MACS_peak_12355	61.94
chr23	1996230	1997425	MACS_peak_12361	54.89
chr23	2104763	2105751	MACS_peak_12364	68.97
chr23	2381425	2383065	MACS_peak_12373	56.64
chr23	4034914	4036140	MACS_peak_12399	60
chr23	4115605	4116512	MACS_peak_12401	77.13
chr23	5533870	5535232	MACS_peak_12419	63.47
chr23	5564665	5566084	MACS_peak_12422	53.32
chr23	7339683	7341022	MACS_peak_12445	68.1
chr23	7382707	7383967	MACS_peak_12446	69.54
chr23	7500681	7502112	MACS_peak_12449	71.99
chr23	8785599	8786359	MACS_peak_12466	53.12
chr23	10759572	10760908	MACS_peak_12504	81.6
chr23	10764449	10766269	MACS_peak_12505	137.43
chr23	13856174	13857794	MACS_peak_12533	116.54
chr23	14927574	14928386	MACS_peak_12550	65.17
chr23	17190766	17192956	MACS_peak_12573	180.22
chr23	19889392	19889987	MACS_peak_12632	55.4
chr23	20141058	20142039	MACS_peak_12641	131.04
chr23	20380036	20380723	MACS_peak_12643	53.14
chr23	20708655	20710352	MACS_peak_12650	86.55
chr23	20741787	20743316	MACS_peak_12654	66.21
chr23	20744539	20745657	MACS_peak_12655	59.8
chr23	21205090	21205796	MACS_peak_12666	69.57
chr23	21720879	21721519	MACS_peak_12673	63.51
chr23	21736702	21738326	MACS_peak_12674	52.86
chr23	21969708	21971474	MACS_peak_12680	174.78
chr23	22946165	22947264	MACS_peak_12695	132.03
chr23	23096986	23098773	MACS_peak_12702	50.91
chr23	23117030	23118443	MACS_peak_12703	87.57
chr23	23131584	23133941	MACS_peak_12705	98.09
chr23	23157665	23162221	MACS_peak_12707	54.21
chr23	23189235	23190279	MACS_peak_12709	95.89
chr23	23361341	23363015	MACS_peak_12715	116.75
chr23	23386682	23387860	MACS_peak_12717	55.49
chr23	23416305	23419291	MACS_peak_12718	70.44
chr23	23533652	23538128	MACS_peak_12723	112.81
chr23	23630931	23632628	MACS_peak_12725	87.14
chr23	23709858	23711633	MACS_peak_12729	96.17
chr23	23769979	23771237	MACS_peak_12731	80.51
chr23	24223129	24224882	MACS_peak_12740	124.81
chr23	24345557	24346542	MACS_peak_12741	71.46
chr23	24367598	24368689	MACS_peak_12743	65.54
chr23	24674967	24677454	MACS_peak_12749	108.73
chr23	24744564	24746589	MACS_peak_12752	472.52
chr23	24858463	24859851	MACS_peak_12757	142.97
chr23	24941433	24943791	MACS_peak_12763	118.49
chr23	24978246	24978917	MACS_peak_12765	57.31
chr23	25030482	25031709	MACS_peak_12768	102.81
chr23	25657486	25660180	MACS_peak_12780	60.12
chr23	25733866	25735259	MACS_peak_12783	152.51
chr23	26029691	26030446	MACS_peak_12790	66.36
chr23	26180215	26181263	MACS_peak_12796	71.41
chr23	26441572	26442233	MACS_peak_12802	65.27
chr23	26655736	26657292	MACS_peak_12804	72.69
chr23	27017569	27018233	MACS_peak_12814	55.13
chr23	27375927	27380428	MACS_peak_12825	69.46
chr23	27471186	27472613	MACS_peak_12831	56.63
chr23	27477320	27479308	MACS_peak_12832	63.09
chr23	27953896	27955493	MACS_peak_12843	61.16
chr23	28250321	28251066	MACS_peak_12857	61.11
chr23	28441319	28443135	MACS_peak_12859	74.83
chr23	29080675	29082578	MACS_peak_12868	100.48
chr23	29102675	29103748	MACS_peak_12869	58.95
chr23	29195783	29198233	MACS_peak_12871	140.58
chr23	29248258	29249512	MACS_peak_12872	75.85
chr23	29317618	29319152	MACS_peak_12874	158.49
chr23	29368184	29369205	MACS_peak_12876	66.14
chr23	29517737	29521628	MACS_peak_12878	147.3
chr23	29527063	29528095	MACS_peak_12879	90.06
chr23	29680206	29683373	MACS_peak_12882	133.07
chr23	29723729	29724709	MACS_peak_12885	51.49
chr23	30021273	30022557	MACS_peak_12893	91.42
chr23	30172341	30174752	MACS_peak_12898	61.15
chr23	30189536	30190842	MACS_peak_12899	164.93
chr23	30423635	30424859	MACS_peak_12902	93.23
chr23	31353040	31353680	MACS_peak_12909	59.09
chr23	32319845	32320797	MACS_peak_12936	134.09
chr23	32500338	32501341	MACS_peak_12944	107.11
chr23	32522917	32523670	MACS_peak_12945	57.54
chr23	32700634	32702508	MACS_peak_12950	54.36
chr23	34364615	34365257	MACS_peak_12989	51.15
chr23	35021892	35023149	MACS_peak_12993	69.34
chr23	35095126	35096223	MACS_peak_12996	91.06
chr23	35190690	35193491	MACS_peak_12998	143.59
chr23	35755299	35758069	MACS_peak_13005	204.38
chr23	35854386	35855207	MACS_peak_13007	54.92
chr23	35947760	35949281	MACS_peak_13011	81.33
chr23	35955820	35956777	MACS_peak_13012	56.97
chr23	35961578	35963212	MACS_peak_13013	155
chr23	36039800	36040959	MACS_peak_13016	60.1
chr23	36279056	36280400	MACS_peak_13023	86.04
chr23	36293496	36294756	MACS_peak_13024	76.15
chr23	36385315	36386429	MACS_peak_13030	72.84
chr23	36480476	36481517	MACS_peak_13035	69.88
chr23	36938230	36938922	MACS_peak_13045	53.83
chr23	39035922	39040089	MACS_peak_13069	248.82
chr23	39636605	39638884	MACS_peak_13085	110.51
chr23	40754803	40756239	MACS_peak_13091	64.88
chr23	41472836	41473718	MACS_peak_13096	77.37
chr23	44968297	44968927	MACS_peak_13135	98.95
chr23	45453785	45454684	MACS_peak_13146	109.36
chr23	45568032	45568752	MACS_peak_13149	81.02
chr23	46066802	46067623	MACS_peak_13159	84.52
chr23	46233144	46234957	MACS_peak_13163	96.88
chr24	2320191	2320760	MACS_peak_13194	51.7
chr24	2390896	2394240	MACS_peak_13197	215.42
chr24	3562541	3563233	MACS_peak_13227	57.05
chr24	4231044	4233089	MACS_peak_13231	67.38
chr24	4537327	4538275	MACS_peak_13239	53.01
chr24	4917353	4919081	MACS_peak_13244	93.26
chr24	4932699	4933571	MACS_peak_13245	62.56
chr24	4938690	4940473	MACS_peak_13246	65.36
chr24	5002787	5003869	MACS_peak_13248	99.59
chr24	5080557	5083193	MACS_peak_13252	83.55
chr24	5089063	5090007	MACS_peak_13253	52.45
chr24	5211384	5212462	MACS_peak_13257	141.27
chr24	5327132	5330601	MACS_peak_13259	82.18
chr24	5765437	5767596	MACS_peak_13260	184.73
chr24	6516099	6517288	MACS_peak_13272	66.81
chr24	7536392	7537399	MACS_peak_13280	87.04
chr24	8814753	8815368	MACS_peak_13298	59.69
chr24	9034839	9039624	MACS_peak_13300	76.78
chr24	9053924	9055851	MACS_peak_13302	163.88
chr24	9272344	9274719	MACS_peak_13311	62.16
chr24	10262653	10265629	MACS_peak_13321	216.83
chr24	11413038	11413797	MACS_peak_13333	50.64
chr24	12696256	12697190	MACS_peak_13345	92.3
chr24	13078068	13080617	MACS_peak_13353	85.85
chr24	13756610	13758610	MACS_peak_13358	180.51
chr24	13794797	13795626	MACS_peak_13359	63.81
chr24	13817724	13818707	MACS_peak_13361	55.55
chr24	13916685	13917962	MACS_peak_13367	105.57
chr24	13932434	13933643	MACS_peak_13368	67.62
chr24	14025825	14027883	MACS_peak_13369	118.45
chr24	14037047	14038930	MACS_peak_13370	79.05
chr24	14049411	14052030	MACS_peak_13371	111.07
chr24	14600966	14602334	MACS_peak_13382	100.76
chr24	16908091	16909490	MACS_peak_13392	84.5
chr24	18130470	18132561	MACS_peak_13416	100.43
chr24	18971660	18973050	MACS_peak_13419	103.88
chr24	19877518	19878403	MACS_peak_13429	60.91
chr24	20111373	20111981	MACS_peak_13435	52.34
chr24	20289478	20290483	MACS_peak_13441	64.68
chr24	20339769	20341325	MACS_peak_13442	96.93
chr24	20757168	20759773	MACS_peak_13454	53.39
chr24	21257188	21258916	MACS_peak_13466	155.17
chr24	21991385	21993035	MACS_peak_13487	62.98
chr24	22046580	22047857	MACS_peak_13491	68.61
chr24	23868224	23870139	MACS_peak_13511	77.31
chr24	23901435	23904641	MACS_peak_13512	82.56
chr24	24202383	24203160	MACS_peak_13517	63.88
chr24	24420228	24421067	MACS_peak_13522	52.86
chr24	25701855	25702962	MACS_peak_13543	77.08
chr24	26258889	26259618	MACS_peak_13551	80.05
chr24	26711441	26712870	MACS_peak_13556	76.69
chr24	27479183	27479751	MACS_peak_13569	51.2
chr24	27615931	27619316	MACS_peak_13571	104.78
chr24	27806202	27807748	MACS_peak_13580	79.77
chr24	29762768	29764936	MACS_peak_13610	166.48
chr24	29771432	29772386	MACS_peak_13611	61
chr24	29779620	29780489	MACS_peak_13612	53.56
chr24	30070574	30071227	MACS_peak_13617	59.83
chr24	30787180	30787757	MACS_peak_13620	50.96
chr24	31420791	31421888	MACS_peak_13631	139.15
chr24	34797989	34800169	MACS_peak_13655	103.05
chr24	36645253	36646081	MACS_peak_13677	75.16
chr24	36986083	36987855	MACS_peak_13683	84.7
chr24	36996729	36997760	MACS_peak_13684	55.52
chr24	37328950	37329818	MACS_peak_13695	66.54
chr24	38289532	38290204	MACS_peak_13713	79.68
chr24	39117594	39118639	MACS_peak_13725	92.63
chr24	39451501	39454784	MACS_peak_13735	156.88
chr24	40489512	40490384	MACS_peak_13754	78.43
chr24	41700601	41701292	MACS_peak_13770	64.78
chr24	43441501	43443963	MACS_peak_13785	92.93
chr25	565494	566428	MACS_peak_13821	96.79
chr25	871782	872448	MACS_peak_13834	54.95
chr25	1039861	1040944	MACS_peak_13836	98.12
chr25	1773192	1776326	MACS_peak_13841	75.2
chr25	3866297	3868121	MACS_peak_13886	150.99
chr25	5153462	5154347	MACS_peak_13899	62.19
chr25	5190824	5192045	MACS_peak_13900	51.17
chr25	5197079	5198212	MACS_peak_13901	68.08
chr25	6375739	6377452	MACS_peak_13914	107.09
chr25	7714847	7716777	MACS_peak_13936	157.99
chr25	8111680	8112929	MACS_peak_13949	69.71
chr25	8786883	8787503	MACS_peak_13958	59.2
chr25	10931090	10932178	MACS_peak_13969	56.05
chr25	14831656	14833280	MACS_peak_14014	78.85
chr25	16349185	16351767	MACS_peak_14026	117.01
chr25	16932502	16933299	MACS_peak_14035	61.03
chr25	16999780	17001136	MACS_peak_14037	62.38
chr25	17622671	17623521	MACS_peak_14055	55.02
chr25	17953071	17954035	MACS_peak_14066	59.33
chr25	17974242	17975236	MACS_peak_14067	52.1
chr25	18300868	18302673	MACS_peak_14069	121.97
chr25	19034404	19035569	MACS_peak_14084	52.94
chr25	19127375	19128590	MACS_peak_14086	113.22
chr25	20820396	20822367	MACS_peak_14117	252.24
chr25	20861233	20862405	MACS_peak_14119	109.81
chr25	23125375	23125988	MACS_peak_14148	50.29
chr25	24226018	24228485	MACS_peak_14161	222.15
chr25	24519658	24521874	MACS_peak_14167	81.03
chr25	24575874	24576990	MACS_peak_14169	52.8
chr25	24622996	24624422	MACS_peak_14170	87.75
chr25	25374984	25379868	MACS_peak_14180	77.42
chr25	25471189	25473005	MACS_peak_14181	212.56
chr25	29855704	29856684	MACS_peak_14228	65.76
chr25	29904444	29906052	MACS_peak_14230	83.31
chr25	32218682	32219827	MACS_peak_14262	81.94
chr25	32593940	32594757	MACS_peak_14276	78.36
chr25	32670122	32671322	MACS_peak_14278	57.55
chr25	33214479	33216563	MACS_peak_14285	120.43
chr25	33593163	33594530	MACS_peak_14293	59.4
chr25	33611718	33613352	MACS_peak_14294	62.79
chr25	35186054	35187482	MACS_peak_14306	76.3
chr25	35288442	35289668	MACS_peak_14308	125.72
chr25	35312722	35313675	MACS_peak_14309	105.77
chr25	35613278	35614150	MACS_peak_14315	53.58
chr3	640167	640993	MACS_peak_14389	60.44
chr3	1979886	1981121	MACS_peak_14407	530.86
chr3	7747125	7749190	MACS_peak_14469	76.02
chr3	7755296	7756698	MACS_peak_14470	68.27
chr3	9076107	9076751	MACS_peak_14499	160.19
chr3	10631234	10632883	MACS_peak_14505	95.32
chr3	13737357	13738861	MACS_peak_14556	145.78
chr3	13876777	13877799	MACS_peak_14560	54.26
chr3	17837714	17839484	MACS_peak_14634	111.15
chr3	18186074	18188052	MACS_peak_14646	210.96
chr3	18434736	18435556	MACS_peak_14654	77.13
chr3	19736897	19738818	MACS_peak_14678	84.5
chr3	21422856	21424104	MACS_peak_14706	102.21
chr3	23605887	23607478	MACS_peak_14735	170.6
chr3	24085859	24087078	MACS_peak_14753	82.39
chr3	26242738	26243673	MACS_peak_14802	59.52
chr3	26573801	26576566	MACS_peak_14807	112.9
chr3	27202558	27203637	MACS_peak_14829	59.73
chr3	27842729	27843599	MACS_peak_14834	60.79
chr3	28664426	28667003	MACS_peak_14849	108.38
chr3	30328773	30330270	MACS_peak_14873	134.29
chr3	31105631	31107330	MACS_peak_14884	132.33
chr3	31708504	31709849	MACS_peak_14895	80.31
chr3	31969114	31970253	MACS_peak_14904	87.06
chr3	32366144	32367163	MACS_peak_14912	103.28
chr3	32435500	32436553	MACS_peak_14914	51.98
chr3	32453639	32454303	MACS_peak_14915	51.15
chr3	32460303	32462378	MACS_peak_14916	141.65
chr3	32469134	32471873	MACS_peak_14917	67.32
chr3	32625683	32627867	MACS_peak_14926	129.5
chr3	32702031	32702687	MACS_peak_14931	50.49
chr3	33078218	33079422	MACS_peak_14950	78.73
chr3	33122889	33124157	MACS_peak_14953	83.33
chr3	33379611	33381112	MACS_peak_14959	80.58
chr3	34229037	34230103	MACS_peak_14974	52.19
chr3	34380275	34381460	MACS_peak_14980	126.13
chr3	34959188	34960057	MACS_peak_14992	66.66
chr3	36187317	36190396	MACS_peak_15006	191.11
chr3	36469375	36470603	MACS_peak_15018	89.81
chr3	36952358	36953934	MACS_peak_15032	72.88
chr3	37061930	37063100	MACS_peak_15038	75.16
chr3	37619221	37621738	MACS_peak_15047	72.02
chr3	37672430	37674347	MACS_peak_15049	72.83
chr3	37678581	37679678	MACS_peak_15050	69.16
chr3	39388550	39389213	MACS_peak_15072	54.9
chr3	39476372	39477044	MACS_peak_15077	53.6
chr3	39657205	39658986	MACS_peak_15081	106.34
chr3	40434070	40437150	MACS_peak_15098	120.74
chr3	40455385	40457162	MACS_peak_15099	123.01
chr3	41813059	41814765	MACS_peak_15125	82.17
chr3	41857328	41860675	MACS_peak_15130	88.46
chr3	41879601	41881635	MACS_peak_15131	101.55
chr3	41903493	41905800	MACS_peak_15133	53.9
chr3	42694232	42695019	MACS_peak_15143	52.66
chr3	43261732	43262852	MACS_peak_15155	80.88
chr3	43331065	43332172	MACS_peak_15156	67.95
chr3	43414934	43416258	MACS_peak_15157	71.94
chr3	43441862	43442750	MACS_peak_15158	58.87
chr3	43641434	43646042	MACS_peak_15160	87.82
chr3	44113036	44114014	MACS_peak_15163	77.66
chr3	45607139	45608499	MACS_peak_15175	65.22
chr3	46882092	46883242	MACS_peak_15193	62.68
chr3	47712951	47714991	MACS_peak_15202	129.13
chr3	47732616	47734607	MACS_peak_15204	129.1
chr3	48566429	48569049	MACS_peak_15220	234.28
chr3	50649278	50650296	MACS_peak_15240	82.55
chr3	50772748	50773840	MACS_peak_15244	94.91
chr3	52531259	52531840	MACS_peak_15252	63.14
chr3	53621729	53623205	MACS_peak_15265	293
chr3	53984489	53985130	MACS_peak_15277	51.24
chr3	54059673	54060515	MACS_peak_15281	52.6
chr3	54077504	54078273	MACS_peak_15282	82.31
chr3	54224760	54226299	MACS_peak_15287	50.25
chr3	54231868	54232997	MACS_peak_15288	54.45
chr3	54261021	54262041	MACS_peak_15289	55.13
chr3	54395114	54396058	MACS_peak_15293	75.83
chr3	54639367	54640539	MACS_peak_15296	65.65
chr3	55464895	55466103	MACS_peak_15303	79.84
chr3	55577177	55579960	MACS_peak_15312	89.53
chr3	56036303	56037405	MACS_peak_15326	67.32
chr3	56055975	56057424	MACS_peak_15327	81.22
chr3	56330433	56331123	MACS_peak_15331	70.81
chr3	56427115	56429628	MACS_peak_15336	117.17
chr3	56537986	56539646	MACS_peak_15338	135.34
chr3	56641244	56642654	MACS_peak_15339	61.57
chr3	57910711	57912567	MACS_peak_15349	125.17
chr3	57986764	57987686	MACS_peak_15350	50.58
chr3	58804160	58804994	MACS_peak_15364	69.72
chr3	61928215	61929887	MACS_peak_15420	87.41
chr3	62750026	62751149	MACS_peak_15434	104.57
chr4	634701	635505	MACS_peak_15469	56
chr4	2383144	2384041	MACS_peak_15509	51.97
chr4	2385491	2386747	MACS_peak_15510	120.65
chr4	4602157	4603318	MACS_peak_15536	117.74
chr4	4917878	4919334	MACS_peak_15544	82.02
chr4	5251574	5252589	MACS_peak_15555	69.97
chr4	5385782	5386996	MACS_peak_15559	81.52
chr4	5940715	5942789	MACS_peak_15572	112.4
chr4	5961066	5962271	MACS_peak_15574	95.88
chr4	6530649	6531336	MACS_peak_15579	56.77
chr4	6915991	6919438	MACS_peak_15584	76.69
chr4	7198827	7201019	MACS_peak_15592	79.82
chr4	7876910	7877623	MACS_peak_15607	51
chr4	8156046	8157165	MACS_peak_15612	79.93
chr4	8173063	8179543	MACS_peak_15613	96.26
chr4	9107713	9108685	MACS_peak_15638	61.64
chr4	9752162	9752999	MACS_peak_15646	55.92
chr4	10348261	10349363	MACS_peak_15656	51.18
chr4	10382992	10383862	MACS_peak_15658	56.39
chr4	10491566	10493297	MACS_peak_15659	132.2
chr4	10570889	10575351	MACS_peak_15663	81.75
chr4	11615332	11616286	MACS_peak_15686	50.88
chr4	11699371	11700995	MACS_peak_15688	64.45
chr4	11884661	11886399	MACS_peak_15694	104.93
chr4	11966352	11969378	MACS_peak_15699	148.25
chr4	12665915	12666976	MACS_peak_15717	96.3
chr4	13032037	13034717	MACS_peak_15726	85.48
chr4	13279702	13281441	MACS_peak_15736	166.22
chr4	13789717	13790993	MACS_peak_15744	52.91
chr4	13797597	13799084	MACS_peak_15746	159.29
chr4	14082043	14083868	MACS_peak_15755	210.09
chr4	14088095	14089239	MACS_peak_15756	50.19
chr4	14931936	14933986	MACS_peak_15766	72.74
chr4	15180988	15182353	MACS_peak_15769	98.73
chr4	15507841	15508836	MACS_peak_15775	53.77
chr4	15515925	15517537	MACS_peak_15776	69.79
chr4	15745102	15745780	MACS_peak_15789	50.18
chr4	16149521	16150721	MACS_peak_15802	80.56
chr4	16221998	16222810	MACS_peak_15806	52.79
chr4	16570660	16571976	MACS_peak_15813	65.09
chr4	16920610	16921405	MACS_peak_15822	88.82
chr4	18756774	18757702	MACS_peak_15848	78.04
chr4	19200549	19201704	MACS_peak_15860	65.83
chr4	19395396	19396639	MACS_peak_15863	99.25
chr4	19809366	19810680	MACS_peak_15871	69.91
chr4	21437806	21438864	MACS_peak_15895	91.21
chr4	27544885	27545868	MACS_peak_15947	64.05
chr4	28468196	28468724	MACS_peak_15955	55.7
chr4	30144576	30146325	MACS_peak_15961	62.34
chr4	42802937	42804146	MACS_peak_16002	56.67
chr4	48099789	48100478	MACS_peak_16019	52.32
chr4	49692613	49693365	MACS_peak_16021	50.52
chr4	50886654	50887650	MACS_peak_16024	92.84
chr4	55134694	55135300	MACS_peak_16038	53.74
chr4	60185099	60186747	MACS_peak_16078	81.55
chr4	61665291	61666261	MACS_peak_16096	138.86
chr5	427189	428616	MACS_peak_16111	115.69
chr5	1192000	1194301	MACS_peak_16118	92.66
chr5	4664813	4665314	MACS_peak_16167	58.57
chr5	5638223	5638884	MACS_peak_16179	57.43
chr5	6660207	6661676	MACS_peak_16187	91.82
chr5	12435657	12437329	MACS_peak_16246	144.02
chr5	14481332	14484085	MACS_peak_16273	58.25
chr5	16036934	16039448	MACS_peak_16290	273.82
chr5	17006309	17007307	MACS_peak_16305	63.57
chr5	17189489	17190241	MACS_peak_16308	65.17
chr5	17846482	17848982	MACS_peak_16322	61.35
chr5	17885583	17886994	MACS_peak_16323	92.41
chr5	18118046	18118946	MACS_peak_16330	50.86
chr5	19128201	19129454	MACS_peak_16341	126.66
chr5	19454218	19455317	MACS_peak_16346	54.5
chr5	19546874	19548368	MACS_peak_16347	109.93
chr5	19560366	19561982	MACS_peak_16350	69.07
chr5	19635670	19636848	MACS_peak_16351	122.8
chr5	19651918	19652662	MACS_peak_16352	51.04
chr5	21295364	21297781	MACS_peak_16375	86.16
chr5	21401929	21403431	MACS_peak_16377	165.32
chr5	21450330	21451309	MACS_peak_16380	50.83
chr5	21474005	21475144	MACS_peak_16381	80.83
chr5	21519005	21521202	MACS_peak_16382	102.42
chr5	21704003	21704912	MACS_peak_16386	50.29
chr5	25873652	25876665	MACS_peak_16462	188.37
chr5	26099215	26100543	MACS_peak_16472	62.21
chr5	26145294	26146481	MACS_peak_16475	85.19
chr5	26652360	26653299	MACS_peak_16484	67.13
chr5	27001469	27002099	MACS_peak_16489	50.78
chr5	27393992	27395329	MACS_peak_16494	119.09
chr5	27860763	27862990	MACS_peak_16501	63.28
chr5	28127620	28129462	MACS_peak_16506	50.2
chr5	28525063	28526808	MACS_peak_16513	160.63
chr5	29042094	29043453	MACS_peak_16516	57.52
chr5	29779760	29780459	MACS_peak_16530	59.03
chr5	30172585	30173368	MACS_peak_16536	61.14
chr5	30216372	30218655	MACS_peak_16538	182.65
chr5	32097423	32100842	MACS_peak_16566	175.08
chr5	32374891	32375993	MACS_peak_16578	56.32
chr5	32668564	32669158	MACS_peak_16586	64.71
chr5	33991553	33996053	MACS_peak_16605	175.99
chr5	34145064	34147368	MACS_peak_16612	55.36
chr5	34162247	34167180	MACS_peak_16614	147.11
chr5	34418456	34420227	MACS_peak_16629	54.56
chr5	34421066	34423396	MACS_peak_16630	99.97
chr5	34656670	34657853	MACS_peak_16637	119.47
chr5	34847554	34848352	MACS_peak_16639	60.54
chr5	35445418	35447383	MACS_peak_16650	128.18
chr5	36033151	36033902	MACS_peak_16652	52.36
chr5	36176189	36177558	MACS_peak_16654	50.38
chr5	36178914	36181055	MACS_peak_16655	56.3
chr5	36700890	36702226	MACS_peak_16670	69.27
chr5	39040160	39040810	MACS_peak_16720	56.88
chr5	39351153	39352339	MACS_peak_16730	80.49
chr5	39466625	39467619	MACS_peak_16731	58.15
chr5	40682579	40684225	MACS_peak_16753	99.6
chr5	41215117	41216750	MACS_peak_16761	51.59
chr5	41217002	41218824	MACS_peak_16762	63.99
chr5	41320641	41321507	MACS_peak_16764	56.11
chr5	41617450	41618032	MACS_peak_16767	50.5
chr5	41645078	41646846	MACS_peak_16768	75.87
chr5	41955384	41957213	MACS_peak_16774	77.95
chr5	42585882	42586559	MACS_peak_16778	73.33
chr5	42594114	42595700	MACS_peak_16779	71.22
chr5	42680130	42682165	MACS_peak_16781	217.47
chr5	45112466	45113226	MACS_peak_16834	51.26
chr5	45504230	45506604	MACS_peak_16849	200.42
chr5	45976264	45977764	MACS_peak_16858	261.04
chr5	46042621	46044645	MACS_peak_16861	97.28
chr5	46087570	46091908	MACS_peak_16864	150.25
chr5	46150658	46154948	MACS_peak_16869	146.37
chr5	46439548	46440475	MACS_peak_16873	87.71
chr5	46545138	46546774	MACS_peak_16881	71.8
chr5	47935261	47936204	MACS_peak_16890	67.18
chr5	50682315	50684317	MACS_peak_16911	143.06
chr5	51153701	51155784	MACS_peak_16919	81.15
chr5	51272530	51273706	MACS_peak_16923	55.45
chr5	51303042	51304467	MACS_peak_16925	89.27
chr5	51392890	51394078	MACS_peak_16930	62.45
chr5	51443285	51448721	MACS_peak_16934	119.68
chr5	51513390	51515356	MACS_peak_16936	58.18
chr5	51523082	51530811	MACS_peak_16937	57.67
chr5	51668127	51669350	MACS_peak_16940	57.4
chr5	51743642	51744630	MACS_peak_16942	72.12
chr5	51914381	51915585	MACS_peak_16945	86.26
chr5	52008878	52010037	MACS_peak_16947	152.27
chr5	52192781	52193803	MACS_peak_16949	66.53
chr5	52237709	52238989	MACS_peak_16952	88.28
chr5	52620128	52621294	MACS_peak_16957	130.09
chr5	52732090	52733177	MACS_peak_16960	62.6
chr5	54773001	54774180	MACS_peak_16976	119.83
chr5	54893305	54895545	MACS_peak_16984	52.39
chr5	55239681	55240840	MACS_peak_16996	58.87
chr5	55987965	55988701	MACS_peak_16999	72.88
chr5	57189535	57190090	MACS_peak_17013	53.02
chr5	57378023	57378908	MACS_peak_17017	102.62
chr5	59053645	59054749	MACS_peak_17041	116.93
chr5	60025433	60027108	MACS_peak_17054	158.73
chr5	62076076	62076861	MACS_peak_17083	61.38
chr5	62818647	62823374	MACS_peak_17087	93.74
chr5	62842725	62843419	MACS_peak_17089	51.9
chr5	65156553	65158004	MACS_peak_17125	95.79
chr5	65697348	65698120	MACS_peak_17131	74.76
chr5	66638712	66639535	MACS_peak_17141	50.17
chr5	68766646	68768391	MACS_peak_17179	52.41
chr5	68912823	68915004	MACS_peak_17184	162.85
chr5	68942733	68944395	MACS_peak_17187	62.18
chr5	68979771	68980345	MACS_peak_17190	56.51
chr5	68990260	68992732	MACS_peak_17191	110.3
chr5	69200385	69201327	MACS_peak_17196	58.95
chr5	69530259	69532003	MACS_peak_17201	82.61
chr5	70385475	70386147	MACS_peak_17219	54.08
chr5	71025035	71026891	MACS_peak_17232	105.8
chr5	71844582	71845426	MACS_peak_17241	72.42
chr5	74010786	74011329	MACS_peak_17279	60.63
chr5	75074995	75075778	MACS_peak_17290	55.07
chr5	75075889	75077411	MACS_peak_17291	94.98
chr5	75294805	75296218	MACS_peak_17302	65.25
chr6	1370692	1372078	MACS_peak_17330	53.72
chr6	1887688	1888691	MACS_peak_17348	60.88
chr6	4155295	4156467	MACS_peak_17379	73.82
chr6	6434182	6436117	MACS_peak_17388	166.5
chr6	6929247	6930538	MACS_peak_17397	81.34
chr6	7291881	7293870	MACS_peak_17405	69.96
chr6	7680963	7682009	MACS_peak_17417	92.87
chr6	7977634	7979091	MACS_peak_17421	67.49
chr6	8696974	8697581	MACS_peak_17437	62.77
chr6	9565509	9567285	MACS_peak_17448	114.47
chr6	9852276	9854442	MACS_peak_17455	158.1
chr6	10977036	10977873	MACS_peak_17473	75.5
chr6	11733623	11735685	MACS_peak_17484	260.16
chr6	11776267	11778112	MACS_peak_17487	59.15
chr6	12367106	12368376	MACS_peak_17500	109.1
chr6	13257142	13260258	MACS_peak_17522	190.12
chr6	13397395	13398144	MACS_peak_17526	61.58
chr6	13883581	13885691	MACS_peak_17533	117.79
chr6	13998021	13999169	MACS_peak_17538	95.33
chr6	14279291	14281532	MACS_peak_17539	260.06
chr6	14304758	14305516	MACS_peak_17541	53.7
chr6	14405309	14407487	MACS_peak_17543	87.03
chr6	14578538	14579171	MACS_peak_17548	53.39
chr6	14626028	14626730	MACS_peak_17549	62.16
chr6	14829270	14833116	MACS_peak_17551	60.65
chr6	15803642	15804438	MACS_peak_17566	63.73
chr6	17613325	17614494	MACS_peak_17578	146.61
chr6	18080880	18082261	MACS_peak_17586	79.8
chr6	18094549	18095962	MACS_peak_17587	58.42
chr6	20059456	20060431	MACS_peak_17616	72.54
chr6	20102373	20103462	MACS_peak_17619	52.77
chr6	20754990	20755941	MACS_peak_17628	91.65
chr6	25468541	25469041	MACS_peak_17672	52.14
chr6	25540044	25540762	MACS_peak_17673	50.59
chr6	25612982	25614738	MACS_peak_17675	52.62
chr6	25748229	25748918	MACS_peak_17678	57.67
chr6	26240711	26241788	MACS_peak_17681	67.75
chr6	26461372	26462813	MACS_peak_17683	86.76
chr6	26595551	26596658	MACS_peak_17686	77.41
chr6	26767622	26769478	MACS_peak_17693	159.38
chr6	26945818	26946556	MACS_peak_17698	66.47
chr6	27632360	27634842	MACS_peak_17705	107.67
chr6	27646796	27648336	MACS_peak_17707	115.92
chr6	27656686	27658811	MACS_peak_17708	50.73
chr6	27669839	27671904	MACS_peak_17710	182.76
chr6	28568828	28570319	MACS_peak_17723	103.53
chr6	28611577	28612181	MACS_peak_17725	56.18
chr6	28758404	28759769	MACS_peak_17728	104.21
chr6	28947563	28948721	MACS_peak_17737	52.05
chr6	29052130	29053259	MACS_peak_17740	101.02
chr6	29132225	29133116	MACS_peak_17745	80.76
chr6	30193653	30194763	MACS_peak_17757	86.39
chr6	30611873	30614021	MACS_peak_17763	133.56
chr6	31310470	31311082	MACS_peak_17773	57.58
chr6	31859195	31860995	MACS_peak_17789	84.53
chr6	31866973	31868602	MACS_peak_17790	96.47
chr6	32423848	32425726	MACS_peak_17793	147.63
chr6	33128553	33130794	MACS_peak_17802	102.25
chr6	33245172	33247063	MACS_peak_17808	53.65
chr6	33431806	33433199	MACS_peak_17813	80.17
chr6	34811464	34812140	MACS_peak_17825	58.5
chr6	36318577	36319266	MACS_peak_17835	52.97
chr6	36327412	36328895	MACS_peak_17836	76.33
chr6	36369609	36371115	MACS_peak_17838	54.67
chr6	36969221	36970573	MACS_peak_17845	126.04
chr6	39261956	39266766	MACS_peak_17877	120.38
chr6	39720960	39721841	MACS_peak_17889	116.33
chr6	40171520	40172423	MACS_peak_17898	55.29
chr6	40466150	40467398	MACS_peak_17904	103.89
chr6	40474324	40474911	MACS_peak_17905	50.05
chr6	40652116	40653346	MACS_peak_17915	93.04
chr6	42033292	42034472	MACS_peak_17943	119.77
chr6	42681643	42682611	MACS_peak_17955	54.42
chr6	43196355	43197134	MACS_peak_17964	59.09
chr6	43577898	43578838	MACS_peak_17971	51.48
chr6	43634723	43636635	MACS_peak_17974	186.43
chr6	43695055	43695967	MACS_peak_17975	57.53
chr6	44345723	44348397	MACS_peak_17992	84.54
chr6	45662227	45663177	MACS_peak_17997	64.7
chr6	46513021	46513778	MACS_peak_18008	92.06
chr6	48025204	48027286	MACS_peak_18023	74.39
chr6	49780557	49781858	MACS_peak_18057	57.36
chr6	49804613	49805822	MACS_peak_18059	103.19
chr6	50348301	50349942	MACS_peak_18070	72.63
chr6	50426678	50427958	MACS_peak_18078	97.69
chr6	51126094	51126876	MACS_peak_18093	59.9
chr6	52731982	52733874	MACS_peak_18120	65.76
chr6	52766891	52768910	MACS_peak_18124	141.09
chr6	54581705	54583689	MACS_peak_18146	144.14
chr6	54600724	54601429	MACS_peak_18148	57.44
chr6	57476072	57476584	MACS_peak_18174	50.37
chr6	57614849	57616938	MACS_peak_18176	78.21
chr6	57883916	57884821	MACS_peak_18184	96.4
chr6	59356447	59357905	MACS_peak_18196	59.08
chr7	518207	518908	MACS_peak_18210	208.46
chr7	1664847	1665725	MACS_peak_18224	77.75
chr7	9151525	9152397	MACS_peak_18284	61.67
chr7	9193438	9196576	MACS_peak_18285	89.58
chr7	16480462	16481028	MACS_peak_18343	51.98
chr7	16684465	16686749	MACS_peak_18348	112.7
chr7	19173410	19175908	MACS_peak_18369	359.28
chr7	19936212	19937378	MACS_peak_18385	57.57
chr7	20988637	20990564	MACS_peak_18415	80.18
chr7	21294844	21295874	MACS_peak_18423	52.24
chr7	22218966	22219887	MACS_peak_18445	62.41
chr7	22931591	22932703	MACS_peak_18463	74.84
chr7	23876078	23876653	MACS_peak_18481	51.14
chr7	23992906	23994320	MACS_peak_18489	129.69
chr7	24062406	24065626	MACS_peak_18491	121.15
chr7	25323367	25325001	MACS_peak_18509	50.17
chr7	25728633	25729456	MACS_peak_18516	59.34
chr7	26121511	26122533	MACS_peak_18530	92.89
chr7	26421044	26423328	MACS_peak_18541	59.57
chr7	27474949	27475712	MACS_peak_18566	51.76
chr7	27557577	27559149	MACS_peak_18570	57.3
chr7	27629860	27631185	MACS_peak_18575	153.81
chr7	27858577	27859750	MACS_peak_18582	51.99
chr7	27950396	27951432	MACS_peak_18584	50.39
chr7	28268931	28269839	MACS_peak_18591	70.27
chr7	28436743	28439112	MACS_peak_18593	96.77
chr7	28459140	28462917	MACS_peak_18594	126.35
chr7	28478364	28481670	MACS_peak_18595	81.46
chr7	28532334	28534142	MACS_peak_18598	57.63
chr7	28899758	28900844	MACS_peak_18601	170.4
chr7	29878438	29881210	MACS_peak_18612	188.79
chr7	30558290	30559405	MACS_peak_18632	78.51
chr7	30802995	30804376	MACS_peak_18638	80.84
chr7	31651864	31653539	MACS_peak_18656	125.2
chr7	31669507	31671199	MACS_peak_18657	143.88
chr7	31977614	31978987	MACS_peak_18668	77.87
chr7	32713688	32715063	MACS_peak_18678	71.59
chr7	32978154	32979726	MACS_peak_18688	143.52
chr7	33733811	33734964	MACS_peak_18698	69.67
chr7	34285449	34287809	MACS_peak_18705	185.26
chr7	34847021	34848377	MACS_peak_18717	70.45
chr7	34914380	34915227	MACS_peak_18718	51.37
chr7	34958388	34960805	MACS_peak_18721	104.84
chr7	34993871	34994997	MACS_peak_18722	76.49
chr7	35151251	35152269	MACS_peak_18726	58.01
chr7	35353438	35355134	MACS_peak_18735	152.97
chr7	35848993	35850472	MACS_peak_18759	57.86
chr7	35900714	35901842	MACS_peak_18760	60.64
chr7	36157141	36159591	MACS_peak_18771	97.72
chr7	36226111	36227348	MACS_peak_18774	88.35
chr7	36344923	36345891	MACS_peak_18781	67.73
chr7	36550024	36550999	MACS_peak_18785	56.23
chr7	36872053	36874306	MACS_peak_18791	211.15
chr7	37190676	37191608	MACS_peak_18796	83.64
chr7	37259720	37261709	MACS_peak_18797	96.12
chr7	37289184	37290866	MACS_peak_18798	85.33
chr7	37322872	37324910	MACS_peak_18800	66.41
chr7	37361548	37363176	MACS_peak_18802	80.6
chr7	37539735	37541350	MACS_peak_18810	78.04
chr7	37696402	37699105	MACS_peak_18814	83.14
chr7	38385189	38387231	MACS_peak_18830	107.53
chr7	38403680	38405637	MACS_peak_18831	66.85
chr7	38659384	38660602	MACS_peak_18834	78.38
chr7	38788786	38789704	MACS_peak_18838	61.9
chr7	38814395	38815802	MACS_peak_18839	62.63
chr7	39040297	39041667	MACS_peak_18844	55.55
chr7	39090949	39091921	MACS_peak_18845	81.63
chr7	39206514	39209142	MACS_peak_18849	138.97
chr7	40222023	40223741	MACS_peak_18871	306.39
chr7	40306495	40308241	MACS_peak_18875	82.81
chr7	41554719	41556504	MACS_peak_18899	101.9
chr7	41850467	41852063	MACS_peak_18903	90.48
chr7	43973096	43974458	MACS_peak_18923	74.08
chr7	44755098	44756634	MACS_peak_18944	51.4
chr7	44914399	44915076	MACS_peak_18949	65.39
chr7	45002178	45003292	MACS_peak_18952	61.57
chr7	47567973	47568781	MACS_peak_18972	213.18
chr7	47955258	47956561	MACS_peak_18981	92.09
chr7	47994487	47996421	MACS_peak_18982	109.11
chr7	48012393	48013582	MACS_peak_18983	83.79
chr7	48063977	48065769	MACS_peak_18984	151.71
chr7	48121364	48122383	MACS_peak_18987	70.16
chr7	48142604	48143904	MACS_peak_18988	51.67
chr7	48297090	48299800	MACS_peak_18991	99.49
chr7	48319596	48320367	MACS_peak_18992	96.27
chr7	48376690	48378825	MACS_peak_18993	61.78
chr7	48400611	48402212	MACS_peak_18995	123.38
chr7	48551923	48552842	MACS_peak_18996	55.98
chr7	48576536	48577748	MACS_peak_18997	71.23
chr7	49576369	49577767	MACS_peak_19002	146.22
chr7	49791400	49792661	MACS_peak_19005	77.43
chr7	52938338	52940532	MACS_peak_19055	165.3
chr7	53147982	53149582	MACS_peak_19060	208.99
chr7	53193537	53194275	MACS_peak_19062	51.79
chr7	53999017	54000906	MACS_peak_19077	56.47
chr7	54015653	54017762	MACS_peak_19079	56.56
chr7	54021877	54024045	MACS_peak_19080	119.54
chr7	54057825	54059250	MACS_peak_19082	88.73
chr7	54093013	54094318	MACS_peak_19084	72.21
chr7	54629052	54630768	MACS_peak_19099	79.82
chr7	55923764	55926122	MACS_peak_19121	140.3
chr7	56859912	56861129	MACS_peak_19137	95.08
chr7	57150566	57153279	MACS_peak_19141	155.74
chr7	57520359	57521253	MACS_peak_19149	84.92
chr7	57559766	57562185	MACS_peak_19150	232.68
chr7	57577856	57578961	MACS_peak_19151	75.52
chr7	57636856	57638231	MACS_peak_19153	79
chr7	57641314	57642900	MACS_peak_19154	107.27
chr7	57672421	57673071	MACS_peak_19156	51.72
chr7	58216416	58217748	MACS_peak_19172	75.3
chr7	58350458	58351463	MACS_peak_19173	67.36
chr7	58558677	58559357	MACS_peak_19174	63.31
chr7	60315087	60315991	MACS_peak_19194	71.93
chr7	60864034	60866625	MACS_peak_19201	256.01
chr7	65989220	65989798	MACS_peak_19245	57.04
chr7	66458192	66460031	MACS_peak_19261	51.09
chr7	66462582	66463769	MACS_peak_19262	64.67
chr7	67663643	67664357	MACS_peak_19282	50.38
chr7	68036867	68039109	MACS_peak_19285	77.84
chr7	68561594	68562596	MACS_peak_19290	94.26
chr7	68912078	68913080	MACS_peak_19292	66.3
chr7	69207992	69209258	MACS_peak_19294	106.09
chr7	69740818	69742459	MACS_peak_19298	114.52
chr7	70439118	70441116	MACS_peak_19305	57.67
chr7	70443069	70445810	MACS_peak_19306	76.34
chr7	70476257	70478791	MACS_peak_19309	85.1
chr7	70513526	70516779	MACS_peak_19310	114.81
chr7	70524769	70527318	MACS_peak_19311	77.87
chr7	70532478	70534082	MACS_peak_19312	59.9
chr7	70538313	70540272	MACS_peak_19313	76.42
chr7	72084359	72086544	MACS_peak_19325	135.15
chr7	76846229	76848282	MACS_peak_19369	55.89
chr7	76857513	76861012	MACS_peak_19370	139.74
chr8	2055695	2057893	MACS_peak_19396	126.18
chr8	3307025	3308286	MACS_peak_19422	108.05
chr8	3631750	3632373	MACS_peak_19427	53.58
chr8	5093205	5094209	MACS_peak_19448	64.77
chr8	6198142	6198493	MACS_peak_19462	95.22
chr8	7368012	7369697	MACS_peak_19464	94.41
chr8	7830720	7831995	MACS_peak_19469	66.38
chr8	9458281	9460615	MACS_peak_19501	98.99
chr8	9673742	9675913	MACS_peak_19509	133.1
chr8	11710571	11712421	MACS_peak_19548	306.83
chr8	12210594	12211541	MACS_peak_19552	70.32
chr8	13522928	13525253	MACS_peak_19567	242.73
chr8	15608575	15609399	MACS_peak_19591	53.62
chr8	16158789	16159681	MACS_peak_19601	62.51
chr8	16872798	16874269	MACS_peak_19602	108.46
chr8	17274156	17275399	MACS_peak_19618	64.65
chr8	18388427	18389180	MACS_peak_19637	65.17
chr8	18406263	18407804	MACS_peak_19638	69.08
chr8	19059275	19060886	MACS_peak_19646	103.17
chr8	19372122	19373426	MACS_peak_19652	113.91
chr8	19411883	19412539	MACS_peak_19655	61.43
chr8	19530980	19531600	MACS_peak_19657	50.24
chr8	19843029	19845448	MACS_peak_19665	78.91
chr8	20095697	20096927	MACS_peak_19673	119.75
chr8	20329595	20330544	MACS_peak_19679	73.28
chr8	20373779	20374998	MACS_peak_19681	70.85
chr8	20780901	20781839	MACS_peak_19692	60.87
chr8	20906989	20909143	MACS_peak_19693	113.43
chr8	20979579	20986767	MACS_peak_19697	111.9
chr8	21079835	21081346	MACS_peak_19700	98.71
chr8	21410816	21411637	MACS_peak_19702	60.89
chr8	22911057	22911947	MACS_peak_19724	51.09
chr8	23950658	23952521	MACS_peak_19737	261.46
chr8	24156650	24157994	MACS_peak_19747	62.86
chr8	24459664	24463545	MACS_peak_19756	72.56
chr8	25625961	25628303	MACS_peak_19781	81.98
chr8	25681411	25682428	MACS_peak_19783	62.77
chr8	25847145	25848153	MACS_peak_19784	59.72
chr8	25914830	25916007	MACS_peak_19787	103.83
chr8	25938018	25938927	MACS_peak_19789	80.58
chr8	26295166	26296367	MACS_peak_19797	51.63
chr8	26326507	26327617	MACS_peak_19798	57.8
chr8	26401285	26403232	MACS_peak_19799	140.3
chr8	26558827	26560015	MACS_peak_19804	84.22
chr8	27207177	27209286	MACS_peak_19827	154.86
chr8	27413803	27414714	MACS_peak_19832	52.78
chr8	28533244	28534490	MACS_peak_19847	83.8
chr8	29444887	29446348	MACS_peak_19868	63.71
chr8	29457864	29459250	MACS_peak_19869	101.29
chr8	30848057	30849273	MACS_peak_19884	113.61
chr8	31094707	31096307	MACS_peak_19890	98.93
chr8	31197990	31198764	MACS_peak_19894	57.37
chr8	31833157	31834819	MACS_peak_19910	72.64
chr8	31956986	31958486	MACS_peak_19915	95.25
chr8	33464374	33466080	MACS_peak_19935	68.62
chr8	35305363	35305955	MACS_peak_19946	52
chr8	35813569	35815468	MACS_peak_19948	59.74
chr8	38684870	38685974	MACS_peak_19969	73.84
chr8	39091577	39092541	MACS_peak_19973	53.37
chr8	39115713	39117270	MACS_peak_19975	98.36
chr8	39230419	39232590	MACS_peak_19977	90.24
chr8	39238477	39240160	MACS_peak_19978	81.85
chr8	39438705	39439543	MACS_peak_19982	73.63
chr8	41534099	41535312	MACS_peak_20000	60.84
chr8	41561367	41563850	MACS_peak_20001	122.55
chr8	41576913	41578295	MACS_peak_20002	262.57
chr8	45642032	45643489	MACS_peak_20046	54.44
chr8	45773829	45774504	MACS_peak_20052	60.15
chr8	45779891	45781455	MACS_peak_20053	70.5
chr8	46473657	46474400	MACS_peak_20066	57.02
chr8	48121795	48122392	MACS_peak_20086	51.6
chr8	48767672	48768822	MACS_peak_20092	64.48
chr8	49938585	49940362	MACS_peak_20103	172.13
chr8	50238164	50239424	MACS_peak_20113	55.24
chr8	50581239	50582601	MACS_peak_20116	82.6
chr8	51288251	51289542	MACS_peak_20122	142.17
chr8	51850077	51850864	MACS_peak_20133	54.79
chr8	52209080	52210139	MACS_peak_20138	92.24
chr8	53780461	53782170	MACS_peak_20154	128.39
chr8	54910244	54912438	MACS_peak_20177	114.01
chr9	899921	901016	MACS_peak_20221	91.76
chr9	986173	987956	MACS_peak_20224	52.97
chr9	1270130	1271419	MACS_peak_20230	96.21
chr9	1590528	1591574	MACS_peak_20238	59.56
chr9	1599229	1600734	MACS_peak_20239	71.65
chr9	1609343	1610466	MACS_peak_20240	102.74
chr9	1705771	1706515	MACS_peak_20244	61.74
chr9	2272080	2272796	MACS_peak_20255	95.06
chr9	3393428	3394726	MACS_peak_20270	57.91
chr9	3608729	3609572	MACS_peak_20277	68.88
chr9	3676798	3678112	MACS_peak_20279	78.81
chr9	4383004	4383767	MACS_peak_20283	70.24
chr9	4815903	4817450	MACS_peak_20285	101.06
chr9	4938632	4940731	MACS_peak_20287	107.36
chr9	5319106	5319651	MACS_peak_20289	53.99
chr9	6037326	6038645	MACS_peak_20295	99.28
chr9	6094323	6096200	MACS_peak_20297	201.5
chr9	7537008	7538962	MACS_peak_20317	256.33
chr9	7557514	7558309	MACS_peak_20318	50.81
chr9	7570589	7572261	MACS_peak_20319	86.39
chr9	8150808	8153724	MACS_peak_20330	124.31
chr9	8545207	8547074	MACS_peak_20339	90.2
chr9	9103625	9104287	MACS_peak_20352	52.3
chr9	9145259	9148122	MACS_peak_20353	182.9
chr9	9413757	9414751	MACS_peak_20362	68.11
chr9	9441987	9444275	MACS_peak_20363	204.49
chr9	10497189	10497716	MACS_peak_20379	55.81
chr9	11896308	11896875	MACS_peak_20390	51.88
chr9	11918972	11920267	MACS_peak_20391	123.56
chr9	12185473	12186393	MACS_peak_20394	86.48
chr9	12987699	12988572	MACS_peak_20404	51.39
chr9	13453713	13455563	MACS_peak_20418	125.17
chr9	13568075	13569238	MACS_peak_20424	69.5
chr9	13902306	13903648	MACS_peak_20439	64.27
chr9	14207957	14209058	MACS_peak_20443	61.23
chr9	14803430	14804909	MACS_peak_20452	54.78
chr9	16324603	16325498	MACS_peak_20471	51.03
chr9	16404721	16406416	MACS_peak_20477	127.18
chr9	17895568	17896216	MACS_peak_20488	54.32
chr9	19631674	19632574	MACS_peak_20509	90.93
chr9	19743046	19743713	MACS_peak_20511	58.8
chr9	19987829	19988763	MACS_peak_20512	68.48
chr9	21764647	21765374	MACS_peak_20529	55.55
chr9	21817204	21819877	MACS_peak_20530	120.95
chr9	22326164	22328261	MACS_peak_20540	121.7
chr9	23646651	23648023	MACS_peak_20556	125.1
chr9	23935845	23936827	MACS_peak_20562	73.62
chr9	24362259	24365790	MACS_peak_20581	264.54
chr9	24824684	24825311	MACS_peak_20590	56.81
chr9	24903568	24905789	MACS_peak_20593	197.89
chr9	24911787	24912562	MACS_peak_20594	77.67
chr9	25033558	25035295	MACS_peak_20596	81.56
chr9	25133849	25134715	MACS_peak_20599	131.71
chr9	26985150	26986353	MACS_peak_20624	69.9
chr9	27129215	27130888	MACS_peak_20633	87.73
chr9	27144109	27145400	MACS_peak_20635	58.97
chr9	28949049	28951430	MACS_peak_20654	176.78
chr9	29147542	29148955	MACS_peak_20656	56.5
chr9	30006917	30009156	MACS_peak_20669	155.17
chr9	30016017	30017256	MACS_peak_20670	223.25
chr9	31075507	31077588	MACS_peak_20686	146.62
chr9	32032438	32033319	MACS_peak_20710	78.78
chr9	32048160	32049551	MACS_peak_20711	123.06
chr9	32304277	32307589	MACS_peak_20717	57.8
chr9	32494785	32495872	MACS_peak_20720	56.64
chr9	32855762	32858069	MACS_peak_20724	202.06
chr9	33906639	33909258	MACS_peak_20737	117.77
chr9	33912654	33914108	MACS_peak_20738	98.89
chr9	34329032	34330014	MACS_peak_20748	74.13
[truncated: 32 more rows]
