# Supplementary material for: Comparative epigenomics in distantly related teleost species identifies conserved cis-regulatory nodes active during the vertebrate phylotypic period
Source: HighWire-hosted journal article supplement (doi:10.1101/gr.163915.113), 2014-04-07
Supplement: Supplemental_TableS5.xlsx [file Supplemental_TableS5.xlsx]

## Sheet: Vista Enhancer Browser Data
	Group1	Group2	Group3	Group3/Group2 precentage	Group4	Group5	Group6	Group6/Group5 precentage	Hypergeometric test Group6/Group5 vs. Group3/Group2
Medaka	2157	115	82	71.3043	253	35	31	88.5714	0.000950772
Zebrafish	1612	58	43	74.1379	281	32	27	84.375	0.0111321
Vista Enhancer Browser database: 1857 injected regions (982 positive)
Group1	H3K27 acetylated in the fish species considered and conserved in humans
Group2	Vista Enhancer Browser database regions overlapping group1
Group3	Vista Enhancer Browser database positive regions overlapping group1
Group4	H3K27 acetylated in both fish species and conserved in humans
Group5	Vista Enhancer Browser database regions overlapping group4
Group6	Vista Enhancer Browser database positive regions overlapping group4

## Sheet: zeb_shared_in_human_pictures
same in zeb and mdk	tested in VistaEB
X	chr1:213498112-213501134	positive
X	chr2:5549618-5553025	positive
	chr2:8781394-8783591	positive
	chr2:45066752-45070624	negative
	chr2:104648312-104650249	negative
X	chr2:105032493-105034445	positive
X	chr2:105317580-105319856	positive
X	chr3:181958774-181961127	positive
X	chr5:2204457-2208380	positive
X	chr5:92312840-92314645	positive
X	chr5:92314781-92316083	positive
X	chr6:9095334-9096985	positive
X	chr6:99089361-99091043	positive
X	chr7:21080801-21082086	positive
X	chr8:37249594-37251182	positive
X	chr8:53166730-53167836	positive
	chr9:98257859-98259405	positive
X	chr11:8226046-8230683	positive
X	chr11:31816452-31818421	positive
X	chr12:24233884-24235634	positive
X	chr13:72333516-72334988	positive
X	chr16:49735099-49736449	positive
	chr16:51389295-51390719	negative
X	chr16:51576725-51578101	positive
X	chr16:52468529-52471762	positive
	chr16:72275206-72276782	negative
X	chr17:2081998-2084289	positive
X	chr21:17681162-17682802	positive
X	chrX:24894335-24896084	positive
X	chrX:139169379-139171545	positive
X	chrX:139332133-139333376	positive
	chrX:139380916-139382199	negative

## Sheet: mdk_shared_in_human_pictures
same in zeb and mdk	tested in VistaEB
	chr1:167296954-167299046	positive
X	chr1:213498112-213501134	positive
X	chr2:5549618-5553025	positive
X	chr2:105032493-105034445	positive
X	chr2:105317580-105319856	positive
X	chr3:181958774-181961127	positive
X	chr5:2204457-2208380	positive
X	chr5:92312840-92314645	positive
X	chr5:92314781-92316083	positive
	chr5:92741502-92744743	negative
	chr5:93226985-93228322	positive
X	chr6:9095334-9096985	positive
X	chr6:99089361-99091043	positive
X	chr7:21080801-21082086	positive
	chr7:21084342-21085460	positive
X	chr8:37249594-37251182	positive
X	chr8:53166730-53167836	positive
	chr8:80874361-80876746	positive
X	chr11:8226046-8230683	positive
X	chr11:31816452-31818421	positive
X	chr12:24233884-24235634	positive
X	chr13:72333516-72334988	positive
X	chr16:49735099-49736449	positive
	chr16:51389295-51390719	negative
X	chr16:51576725-51578101	positive
	chr16:51657810-51658716	positive
X	chr16:52468529-52471762	positive
	chr16:72275206-72276782	negative
X	chr17:2081998-2084289	positive
	chr18:22864753-22866457	positive
X	chr21:17681162-17682802	positive
X	chrX:24894335-24896084	positive
X	chrX:139169379-139171545	positive
X	chrX:139332133-139333376	positive
	chrX:139380916-139382199	negative
