# Supplementary material for: Comparative epigenomics in distantly related teleost species identifies conserved cis-regulatory nodes active during the vertebrate phylotypic period
Source: HighWire-hosted journal article supplement (doi:10.1101/gr.163915.113), 2014-04-07
Supplement: Supplemental_TableS6.xlsx [file Supplemental_TableS6.xlsx]

## Sheet: cSPARRS-associated genes
Genes associated with cSPARRs: Conserved and co-acetylated regulatory regions associated to the same genes in D. rerio and O. latipes
genes	zebraM (c.p.m.)	mdkM (c.p.m)	Ensembl.Gene.ID	Associated.Gene.Name	Description
ENSDARG00000037870	15977.4	21425.6	ENSDARG00000037870	actb2	actin, beta 2 [Source:ZFIN;Acc:ZDB-GENE-000329-3]
ENSDARG00000036080	5171.47	252.336	ENSDARG00000036080	cd81	CD81 antigen [Source:ZFIN;Acc:ZDB-GENE-000831-5]
ENSDARG00000023055	4800.83	24.4136	ENSDARG00000023055	slc25a43	solute carrier family 25, member 43 [Source:ZFIN;Acc:ZDB-GENE-030616-69]
ENSDARG00000052139	2103.39	1151.12	ENSDARG00000052139	notch3	notch homolog 3 [Source:ZFIN;Acc:ZDB-GENE-000329-5]
ENSDARG00000040926	1114.23	246.688	ENSDARG00000040926	nr2f2	nuclear receptor subfamily 2, group F, member 2 [Source:ZFIN;Acc:ZDB-GENE-990415-252]
ENSDARG00000028198	987.073	360.653	ENSDARG00000028198	ube2v2	ubiquitin-conjugating enzyme E2 variant 2 [Source:ZFIN;Acc:ZDB-GENE-040426-2919]
ENSDARG00000091419	765.802	76.7835	ENSDARG00000091419	nrarpa	notch-regulated ankyrin repeat protein a [Source:ZFIN;Acc:ZDB-GENE-030515-6]
ENSDARG00000014420	733.065	209.792	ENSDARG00000014420	elavl3	ELAV (embryonic lethal, abnormal vision, Drosophila)-like 3 (Hu antigen C) [Source:ZFIN;Acc:ZDB-GENE-980526-76]
ENSDARG00000040503	612.824	359.327	ENSDARG00000040503	CABZ01070258.1	Uncharacterized protein [Source:UniProtKB/TrEMBL;Acc:E7F3S4]
ENSDARG00000068401	602.825	201.886	ENSDARG00000068401	yap1	Yes-associated protein 1 [Source:ZFIN;Acc:ZDB-GENE-030131-9710]
ENSDARG00000018534	568.397	2.50872	ENSDARG00000018534	slc6a9	solute carrier family 6 (neurotransmitter transporter, glycine), member 9 [Source:ZFIN;Acc:ZDB-GENE-050105-3]
ENSDARG00000026165	422.333	104.743	ENSDARG00000026165	col11a1a	collagen, type XI, alpha 1a [Source:ZFIN;Acc:ZDB-GENE-070209-167]
ENSDARG00000075542	407.693	458.078	ENSDARG00000075542	zfhx4	zinc finger homeobox 4 [Source:ZFIN;Acc:ZDB-GENE-070530-3]
ENSDARG00000040923	391.424	196.407	ENSDARG00000040923	crabp2a	cellular retinoic acid binding protein 2, a [Source:ZFIN;Acc:ZDB-GENE-020320-4]
ENSDARG00000034344	380.455	1021.83	ENSDARG00000034344	pcdh19	protocadherin 19 [Source:ZFIN;Acc:ZDB-GENE-030131-4218]
ENSDARG00000074335	370.203	377.947	ENSDARG00000074335	boc	brother of CDO [Source:ZFIN;Acc:ZDB-GENE-030131-6560]
ENSDARG00000052695	367.448	163.427	ENSDARG00000052695	nr2f1a	nuclear receptor subfamily 2, group F, member 1a [Source:ZFIN;Acc:ZDB-GENE-980526-115]
ENSDARG00000014259	340.679	70.5682	ENSDARG00000014259	eya1	eyes absent homolog 1 [Source:ZFIN;Acc:ZDB-GENE-990712-18]
ENSDARG00000040439	324.601	358.205	ENSDARG00000040439	rsl24d1	ribosomal L24 domain containing 1 [Source:ZFIN;Acc:ZDB-GENE-040426-1925]
ENSDARG00000052947	319.188	227.626	ENSDARG00000052947	irx3a	iroquois homeobox protein 3a [Source:ZFIN;Acc:ZDB-GENE-991119-5]
ENSDARG00000070228	317.907	111.938	ENSDARG00000070228	cdk6	cyclin-dependent kinase 6 [Source:ZFIN;Acc:ZDB-GENE-060503-786]
ENSDARG00000006687	313.649	62.3868	ENSDARG00000006687	h2afy2	H2A histone family, member Y2 [Source:ZFIN;Acc:ZDB-GENE-050913-114]
ENSDARG00000035285	309.407	299.158	ENSDARG00000035285	ncor1	nuclear receptor co-repressor 1 [Source:ZFIN;Acc:ZDB-GENE-040426-993]
ENSDARG00000003165	305.511	142.204	ENSDARG00000003165	nr2f6b	nuclear receptor subfamily 2, group F, member 6b [Source:ZFIN;Acc:ZDB-GENE-040426-2351]
ENSDARG00000077353	286.293	596.423	ENSDARG00000077353	rerea	arginine-glutamic acid dipeptide (RE) repeats a [Source:ZFIN;Acc:ZDB-GENE-060718-1]
ENSDARG00000016154	268.11	510.691	ENSDARG00000016154	zfp36l1a	zinc finger protein 36, C3H type-like 1a [Source:ZFIN;Acc:ZDB-GENE-030131-9860]
ENSDARG00000056427	251.781	120.281	ENSDARG00000056427	auts2	autism susceptibility candidate 2 [Source:ZFIN;Acc:ZDB-GENE-030616-571]
ENSDARG00000071497	233.285	137.258	ENSDARG00000071497	zic3	zic family member 3 heterotaxy 1 (odd-paired homolog, Drosophila) [Source:ZFIN;Acc:ZDB-GENE-030708-2]
ENSDARG00000015567	232.538	154.715	ENSDARG00000015567	zic1	zic family member 1 (odd-paired homolog, Drosophila) [Source:ZFIN;Acc:ZDB-GENE-000208-4]
ENSDARG00000033539	221.25	1157.97	ENSDARG00000033539	paics	phosphoribosylaminoimidazole carboxylase, phosphoribosylaminoimidazole succinocarboxamide synthetase [Source:ZFIN;Acc:ZDB-GENE-030131-9762]
ENSDARG00000077840	214.065	229.489	ENSDARG00000077840	meis2b	myeloid ecotropic viral integration site 2b [Source:ZFIN;Acc:ZDB-GENE-000210-23]
ENSDARG00000004060	212.165	44.1948	ENSDARG00000004060	bhlhe40	basic helix-loop-helix family, member e40 [Source:ZFIN;Acc:ZDB-GENE-030131-3133]
ENSDARG00000058730	210.232	36.6539	ENSDARG00000058730	rdh10a	retinol dehydrogenase 10a [Source:ZFIN;Acc:ZDB-GENE-070112-2242]
ENSDARG00000016404	205.174	138.04	ENSDARG00000016404	ptch1	patched 1 [Source:ZFIN;Acc:ZDB-GENE-980526-196]
ENSDARG00000074319	204.131	452.442	ENSDARG00000074319	sall1a	sal-like 1a (Drosophila) [Source:ZFIN;Acc:ZDB-GENE-020228-2]
ENSDARG00000059259	203.537	43.7764	ENSDARG00000059259	pabpc4	poly(A) binding protein, cytoplasmic 4 (inducible form) [Source:ZFIN;Acc:ZDB-GENE-030131-9663]
ENSDARG00000052094	201.898	437.394	ENSDARG00000052094	notch1b	notch homolog 1b [Source:ZFIN;Acc:ZDB-GENE-990415-183]
ENSDARG00000021389	196.85	62.8527	ENSDARG00000021389	jag2	jagged 2 [Source:ZFIN;Acc:ZDB-GENE-011128-3]
ENSDARG00000011582	195.326	40.9988	ENSDARG00000011582	sox5	SRY-box containing gene 5 [Source:ZFIN;Acc:ZDB-GENE-000607-13]
ENSDARG00000013575	185.098	84.0266	ENSDARG00000013575	rfx2	regulatory factor X, 2 (influences HLA class II expression) [Source:ZFIN;Acc:ZDB-GENE-050227-4]
ENSDARG00000011533	183.669	255.829	ENSDARG00000011533	sema6dl	sema domain, transmembrane domain (TM), and cytoplasmic domain, (semaphorin) 6D, like [Source:ZFIN;Acc:ZDB-GENE-050417-171]
ENSDARG00000070913	180.485	351.185	ENSDARG00000070913	sox2	SRY-box containing gene 2 [Source:ZFIN;Acc:ZDB-GENE-030909-1]
ENSDARG00000061841	179.892	88.1527	ENSDARG00000061841	tiparp	TCDD-inducible poly(ADP-ribose) polymerase [Source:ZFIN;Acc:ZDB-GENE-031002-47]
ENSDARG00000055283	175.981	148.513	ENSDARG00000055283	id2a	inhibitor of DNA binding 2, dominant negative helix-loop-helix protein, a [Source:ZFIN;Acc:ZDB-GENE-020910-1]
ENSDARG00000076120	171.342	54.0972	ENSDARG00000076120	foxp4	forkhead box P4 [Source:ZFIN;Acc:ZDB-GENE-101207-1]
ENSDARG00000062646	168.376	542.637	ENSDARG00000062646	tet3	tet methylcytosine dioxygenase 3 [Source:ZFIN;Acc:ZDB-GENE-060526-109]
ENSDARG00000076657	167.453	55.3029	ENSDARG00000076657	plagl2	pleiomorphic adenoma gene-like 2 [Source:ZFIN;Acc:ZDB-GENE-020806-1]
ENSDARG00000018968	158.699	100.19	ENSDARG00000018968	acvr1b	activin A receptor, type IB [Source:ZFIN;Acc:ZDB-GENE-980526-527]
ENSDARG00000094992	156.142	176.096	ENSDARG00000094992	otx1b	orthodenticle homolog 1b [Source:ZFIN;Acc:ZDB-GENE-980526-400]
ENSDARG00000079317	154.928	174.908	ENSDARG00000079317	DLC1	deleted in liver cancer 1 [Source:HGNC Symbol;Acc:2897]
ENSDARG00000045485	137.488	26.0596	ENSDARG00000045485	rassf8b	Ras association (RalGDS/AF-6) domain family 8b [Source:ZFIN;Acc:ZDB-GENE-040426-1338]
ENSDARG00000015536	136.765	11.3697	ENSDARG00000015536	sox6	SRY-box containing gene 6 [Source:ZFIN;Acc:ZDB-GENE-081120-6]
ENSDARG00000036292	135.796	741.943	ENSDARG00000036292	cdx4	caudal type homeo box transcription factor 4 [Source:ZFIN;Acc:ZDB-GENE-980526-330]
ENSDARG00000070538	129.196	43.4091	ENSDARG00000070538	hey1	hairy/enhancer-of-split related with YRPW motif 1 [Source:ZFIN;Acc:ZDB-GENE-000607-70]
ENSDARG00000033978	127.115	73.1139	ENSDARG00000033978	nxn	nucleoredoxin [Source:ZFIN;Acc:ZDB-GENE-050522-75]
ENSDARG00000060070	126.163	20.7824	ENSDARG00000060070	adcy7	adenylate cyclase 7 [Source:ZFIN;Acc:ZDB-GENE-040713-1]
ENSDARG00000078026	111.828	11.9305	ENSDARG00000078026	zcchc24	zinc finger, CCHC domain containing 24 [Source:ZFIN;Acc:ZDB-GENE-030131-3573]
ENSDARG00000015472	110.116	177.722	ENSDARG00000015472	gpc4	glypican 4 [Source:ZFIN;Acc:ZDB-GENE-011119-1]
ENSDARG00000058993	108.759	109.753	ENSDARG00000058993	rock1	Rho-associated, coiled-coil containing protein kinase 1 [Source:ZFIN;Acc:ZDB-GENE-100712-2]
ENSDARG00000009958	108.16	23.5396	ENSDARG00000009958	cbl	Cas-Br-M (murine) ecotropic retroviral transforming sequence [Source:ZFIN;Acc:ZDB-GENE-041114-207]
ENSDARG00000069356	104.619	136.468	ENSDARG00000069356	LPHN2 (1 of 3)	latrophilin 2 [Source:HGNC Symbol;Acc:18582]
ENSDARG00000045893	103.511	9.69609	ENSDARG00000045893	kctd15a	potassium channel tetramerisation domain containing 15a [Source:ZFIN;Acc:ZDB-GENE-041010-105]
ENSDARG00000031307	101.902	58.471	ENSDARG00000031307	zic4	zic family member 4 [Source:ZFIN;Acc:ZDB-GENE-040622-4]
ENSDARG00000060397	100.608	53.0129	ENSDARG00000060397	hhip	hedgehog interacting protein [Source:ZFIN;Acc:ZDB-GENE-030131-4827]
ENSDARG00000034043	99.8529	160.623	ENSDARG00000034043	irx5a	iroquois homeobox protein 5a [Source:ZFIN;Acc:ZDB-GENE-010716-2]
ENSDARG00000026395	99.2162	147.739	ENSDARG00000026395	rfx4	regulatory factor X, 4 [Source:ZFIN;Acc:ZDB-GENE-040909-2]
ENSDARG00000042904	96.5602	52.6323	ENSDARG00000042904	foxo3b	forkhead box O3b [Source:ZFIN;Acc:ZDB-GENE-990708-6]
ENSDARG00000080009	93.7511	205.449	ENSDARG00000080009	BAHCC1	BAH domain and coiled-coil containing 1 [Source:HGNC Symbol;Acc:29279]
ENSDARG00000073869	93.6218	205.497	ENSDARG00000073869	pdzrn3b	PDZ domain containing RING finger 3b [Source:ZFIN;Acc:ZDB-GENE-071022-4]
ENSDARG00000020759	88.8923	33.4705	ENSDARG00000020759	ef1	ETS-related factor1 [Source:ZFIN;Acc:ZDB-GENE-980526-335]
ENSDARG00000041869	86.5286	306.441	ENSDARG00000041869	tnfrsf19	tumor necrosis factor receptor superfamily, member 19 [Source:ZFIN;Acc:ZDB-GENE-030131-6760]
ENSDARG00000024694	86.2715	123.962	ENSDARG00000024694	myo1bl2	myosin 1b-like 2 [Source:ZFIN;Acc:ZDB-GENE-030131-695]
ENSDARG00000078308	81.1952	67.8412	ENSDARG00000078308	spry2	sprouty homolog 2 [Source:ZFIN;Acc:ZDB-GENE-030131-7038]
ENSDARG00000074414	78.0605	18.3485	ENSDARG00000074414	sema4ba	sema domain, immunoglobulin domain (Ig), transmembrane domain (TM) and short cytoplasmic domain, (semaphorin) 4Ba [Source:ZFIN;Acc:ZDB-GENE-070705-31]
ENSDARG00000008953	77.4593	44.2888	ENSDARG00000008953	pofut1	protein O-fucosyltransferase 1 [Source:ZFIN;Acc:ZDB-GENE-040303-2]
ENSDARG00000022203	76.7688	54.0174	ENSDARG00000022203	si:dkey-32e10.2	si:dkey-32e10.2 [Source:ZFIN;Acc:ZDB-GENE-110411-110]
ENSDARG00000019473	71.042	140.197	ENSDARG00000019473	kirrel3l	kin of IRRE like 3 like [Source:ZFIN;Acc:ZDB-GENE-070831-1]
ENSDARG00000033175	65.5008	54.3641	ENSDARG00000033175	snrpe	small nuclear ribonucleoprotein polypeptide E [Source:ZFIN;Acc:ZDB-GENE-040426-1112]
ENSDARG00000035909	64.4445	20.8633	ENSDARG00000035909	mfsd2ab	major facilitator superfamily domain containing 2ab [Source:ZFIN;Acc:ZDB-GENE-040801-89]
ENSDARG00000042277	62.6218	120.99	ENSDARG00000042277	efnb3b	ephrin B3b [Source:ZFIN;Acc:ZDB-GENE-010618-3]
ENSDARG00000014180	60.7913	146.338	ENSDARG00000014180	ildr2	immunoglobulin-like domain containing receptor 2 [Source:ZFIN;Acc:ZDB-GENE-050706-83]
ENSDARG00000011931	60.686	17.0616	ENSDARG00000011931	dph5	DPH5 homolog (S. cerevisiae) [Source:ZFIN;Acc:ZDB-GENE-041114-85]
ENSDARG00000006192	59.6124	175.75	ENSDARG00000006192	gatad2ab	GATA zinc finger domain containing 2Ab [Source:ZFIN;Acc:ZDB-GENE-040426-2372]
ENSDARG00000070623	56.3759	13.3676	ENSDARG00000070623	med10	mediator of RNA polymerase II transcription, subunit 10 homolog [Source:ZFIN;Acc:ZDB-GENE-070117-2423]
ENSDARG00000076297	55.8031	45.4578	ENSDARG00000076297	NFATC3 (1 of 2)	nuclear factor of activated T-cells, cytoplasmic, calcineurin-dependent 3 [Source:HGNC Symbol;Acc:7777]
ENSDARG00000053262	55.1527	9.06381	ENSDARG00000053262	atp1b4	ATPase, (Na+)/K+ transporting, beta 4 polypeptide [Source:ZFIN;Acc:ZDB-GENE-070412-1]
ENSDARG00000062915	54.8515	57.6474	ENSDARG00000062915	polr3b	polymerase (RNA) III (DNA directed) polypeptide B [Source:ZFIN;Acc:ZDB-GENE-030131-2887]
ENSDARG00000006754	52.2985	117.024	ENSDARG00000006754	mllt3	myeloid/lymphoid or mixed lineage-leukemia translocation to 3 homolog (Drosophila) [Source:ZFIN;Acc:ZDB-GENE-050417-356]
ENSDARG00000031763	51.2317	62.45	ENSDARG00000031763	smad6b	SMAD family member 6b [Source:ZFIN;Acc:ZDB-GENE-050419-198]
ENSDARG00000077852	50.6036	16.1163	ENSDARG00000077852	samd11	sterile alpha motif domain containing 11 [Source:ZFIN;Acc:ZDB-GENE-060428-2]
ENSDARG00000075253	49.2133	44.69	ENSDARG00000075253	pik3cb	phosphoinositide-3-kinase, catalytic, beta polypeptide [Source:ZFIN;Acc:ZDB-GENE-030131-1904]
ENSDARG00000038429	48.4279	76.2577	ENSDARG00000038429	csrnp1b	cysteine-serine-rich nuclear protein 1b [Source:ZFIN;Acc:ZDB-GENE-030131-1515]
ENSDARG00000060808	46.2463	103.717	ENSDARG00000060808	mecom	MDS1 and EVI1 complex locus [Source:ZFIN;Acc:ZDB-GENE-050208-123]
ENSDARG00000020053	43.067	25.1163	ENSDARG00000020053	nkd1	naked cuticle homolog 1 (Drosophila) [Source:ZFIN;Acc:ZDB-GENE-061108-3]
ENSDARG00000036695	43.0027	48.6701	ENSDARG00000036695	calcoco1	calcium binding and coiled-coil domain 1 [Source:ZFIN;Acc:ZDB-GENE-030131-6911]
ENSDARG00000062973	42.51	12.9825	ENSDARG00000062973	ttll7	tubulin tyrosine ligase-like family, member 7 [Source:ZFIN;Acc:ZDB-GENE-070112-2112]
ENSDARG00000078191	41.9886	13.4601	ENSDARG00000078191	zbtb46	zinc finger and BTB domain containing 46 [Source:ZFIN;Acc:ZDB-GENE-090313-352]
ENSDARG00000057143	41.1061	160.151	ENSDARG00000057143	ngfr	nerve growth factor receptor (TNFR superfamily, member 16) [Source:ZFIN;Acc:ZDB-GENE-030131-2537]
ENSDARG00000011133	41.0235	17.3732	ENSDARG00000011133	ccne1	cyclin E1 [Source:ZFIN;Acc:ZDB-GENE-980526-168]
ENSDARG00000062573	40.9172	84.8555	ENSDARG00000062573	znrf3	zinc and ring finger 3 [Source:ZFIN;Acc:ZDB-GENE-070705-263]
ENSDARG00000052697	40.7086	42.9449	ENSDARG00000052697	fam172a	family with sequence similarity 172, member A [Source:ZFIN;Acc:ZDB-GENE-040426-1396]
ENSDARG00000056642	40.6297	37.5066	ENSDARG00000056642	hdac9b	histone deacetylase 9b [Source:ZFIN;Acc:ZDB-GENE-040109-7]
ENSDARG00000021916	40.1518	3.7002	ENSDARG00000021916	vax1	ventral anterior homeobox 1 [Source:ZFIN;Acc:ZDB-GENE-030904-9]
ENSDARG00000006288	40.0877	6.52491	ENSDARG00000006288	prdm5	PR domain containing 5 [Source:ZFIN;Acc:ZDB-GENE-040708-1]
ENSDARG00000021938	37.2523	84.1973	ENSDARG00000021938	smad9	MAD homolog 9 (Drosophila) [Source:ZFIN;Acc:ZDB-GENE-031014-1]
ENSDARG00000009510	36.1946	103.522	ENSDARG00000009510	irx1a	iroquois homeobox protein 1, a [Source:ZFIN;Acc:ZDB-GENE-040707-1]
ENSDARG00000070621	35.805	2.07895	ENSDARG00000070621	FAM72B	family with sequence similarity 72, member B [Source:HGNC Symbol;Acc:24805]
ENSDARG00000018688	35.4464	65.0725	ENSDARG00000018688	elk3	ELK3, ETS-domain protein [Source:ZFIN;Acc:ZDB-GENE-030716-2]
ENSDARG00000026329	35.3274	74.8781	ENSDARG00000026329	ARHGAP29 (1 of 2)	Rho GTPase activating protein 29 [Source:HGNC Symbol;Acc:30207]
ENSDARG00000061147	31.571	67.9942	ENSDARG00000061147	ZFP64	zinc finger protein 64 homolog (mouse) [Source:HGNC Symbol;Acc:15940]
ENSDARG00000069989	31.4414	17.8835	ENSDARG00000069989	bnc2	basonuclin 2 [Source:ZFIN;Acc:ZDB-GENE-030131-5784]
ENSDARG00000000588	30.6292	25.8366	ENSDARG00000000588	graspl	GRP1 (general receptor for phosphoinositides 1)-associated scaffold protein like [Source:ZFIN;Acc:ZDB-GENE-060312-30]
ENSDARG00000043727	29.0846	30.9673	ENSDARG00000043727	cwc27	CWC27 spliceosome-associated protein homolog (S. cerevisiae) [Source:ZFIN;Acc:ZDB-GENE-040426-1118]
ENSDARG00000086645	28.2549	98.3965	ENSDARG00000086645	hs3st3b1b	heparan sulfate (glucosamine) 3-O-sulfotransferase 3B1b [Source:ZFIN;Acc:ZDB-GENE-070202-5]
ENSDARG00000004436	27.9901	15.8676	ENSDARG00000004436	fam92a1	family with sequence similarity 92, member A1 [Source:ZFIN;Acc:ZDB-GENE-040801-123]
ENSDARG00000087844	27.0007	16.5255	ENSDARG00000087844	plekhn1	pleckstrin homology domain containing, family N member 1 [Source:ZFIN;Acc:ZDB-GENE-090313-357]
ENSDARG00000068702	23.1748	3.55689	ENSDARG00000068702	lysmd4	LysM, putative peptidoglycan-binding, domain containing 4 [Source:ZFIN;Acc:ZDB-GENE-040426-1895]
ENSDARG00000008852	22.9193	12.817	ENSDARG00000008852	elp4	elongation protein 4 homolog (S. cerevisiae) [Source:ZFIN;Acc:ZDB-GENE-050417-114]
ENSDARG00000077722	21.6601	45.2549	ENSDARG00000077722	ppp2r3a	protein phosphatase 2, regulatory subunit B'', alpha [Source:ZFIN;Acc:ZDB-GENE-070912-646]
ENSDARG00000017229	20.5468	25.1983	ENSDARG00000017229	megf10	multiple EGF-like-domains 10 [Source:ZFIN;Acc:ZDB-GENE-080506-1]
ENSDARG00000036548	20.0534	45.5935	ENSDARG00000036548	s1pr2	sphingosine-1-phosphate receptor 2 [Source:ZFIN;Acc:ZDB-GENE-020123-2]
ENSDARG00000058011	20.0008	34.4161	ENSDARG00000058011	arx	aristaless related homeobox [Source:ZFIN;Acc:ZDB-GENE-990415-15]
ENSDARG00000051748	19.7307	66.517	ENSDARG00000051748	ccnd2a	cyclin D2, a [Source:ZFIN;Acc:ZDB-GENE-070424-30]
ENSDARG00000057721	18.8801	97.2776	ENSDARG00000057721	hoxa1a	homeo box A1a [Source:ZFIN;Acc:ZDB-GENE-000823-5]
ENSDARG00000036096	15.8803	24.2254	ENSDARG00000036096	smad3a	MAD homolog 3a (Drosophila) [Source:ZFIN;Acc:ZDB-GENE-000509-3]
ENSDARG00000030297	15.4211	20.7064	ENSDARG00000030297	SOX13	SRY (sex determining region Y)-box 13 [Source:HGNC Symbol;Acc:11192]
ENSDARG00000058004	15.4019	20.0651	ENSDARG00000058004	six2a	sine oculis-related homeobox 2a [Source:ZFIN;Acc:ZDB-GENE-010412-1]
ENSDARG00000033556	15.2939	3.29949	ENSDARG00000033556	PCDH11Y	protocadherin 11 Y-linked [Source:HGNC Symbol;Acc:15813]
ENSDARG00000061889	12.7624	20.8608	ENSDARG00000061889	ppcs	phosphopantothenoylcysteine synthetase [Source:ZFIN;Acc:ZDB-GENE-060512-104]
ENSDARG00000055226	11.0802	16.6523	ENSDARG00000055226	slc7a7	solute carrier family 7 (cationic amino acid transporter, y+ system), member 7 [Source:ZFIN;Acc:ZDB-GENE-051127-5]
ENSDARG00000075887	9.14137	30.0448	ENSDARG00000075887	HERC3	HECT and RLD domain containing E3 ubiquitin protein ligase 3 [Source:HGNC Symbol;Acc:4876]
ENSDARG00000004647	7.88935	13.5385	ENSDARG00000004647	spice1	spindle and centriole associated protein 1 [Source:ZFIN;Acc:ZDB-GENE-041212-64]
ENSDARG00000005033	7.61581	32.0696	ENSDARG00000005033	trip4	thyroid hormone receptor interactor 4 [Source:ZFIN;Acc:ZDB-GENE-040724-92]
ENSDARG00000038990	5.42141	20.5475	ENSDARG00000038990	wnt3	wingless-type MMTV integration site family, member 3 [Source:ZFIN;Acc:ZDB-GENE-081003-1]
ENSDARG00000041982	4.85483	26.1092	ENSDARG00000041982	ADAMTS6	ADAM metallopeptidase with thrombospondin type 1 motif, 6 [Source:HGNC Symbol;Acc:222]
ENSDARG00000088414	4.51124	19.9314	ENSDARG00000088414	ate1	arginyltransferase 1 [Source:ZFIN;Acc:ZDB-GENE-070410-12]
ENSDARG00000017355	3.73755	10.6066	ENSDARG00000017355	rsph9	radial spoke head 9 homolog [Source:ZFIN;Acc:ZDB-GENE-051120-129]
ENSDARG00000044216	3.73755	10.8884	ENSDARG00000044216	fto	fat mass and obesity associated [Source:ZFIN;Acc:ZDB-GENE-061108-1]
ENSDARG00000074396	3.66465	2.8409	ENSDARG00000074396	fscn2b	fascin homolog 2, actin-bundling protein, retinal (Strongylocentrotus purpuratus) b [Source:ZFIN;Acc:ZDB-GENE-040426-1740]
ENSDARG00000073861	3.01422	18.9941	ENSDARG00000073861	GLIS2 (1 of 2)	GLIS family zinc finger 2 [Source:HGNC Symbol;Acc:29450]
ENSDARG00000035677	2.52646	4.75063	ENSDARG00000035677	bmp8a	bone morphogenetic protein 8a [Source:ZFIN;Acc:ZDB-GENE-030912-13]
ENSDARG00000069196	2.33762	7.76342	ENSDARG00000069196	ebf1b	early B-cell factor 1b [Source:ZFIN;Acc:ZDB-GENE-090814-2]
ENSDARG00000060845	2.2565	24.6772	ENSDARG00000060845	si:ch211-134j6.4	si:ch211-134j6.4 [Source:ZFIN;Acc:ZDB-GENE-090313-28]

## Sheet: O.latipes_GO_ALL_H3k27Ac
Biological Process functions of genes associated with all H3K27Ac peaks in O. Latipes (DAVID)
Category	Term	Count	%	PValue	Genes	List.Total	Pop.Hits	Pop.Total	Fold.Enrichment	Bonferroni	Benjamini	FDR
GOTERM_BP_FAT	GO:0048598~embryonic morphogenesis	79	2.86751	1.12087e-11	ENSDARG00000014259, ENSDARG00000070805, ENSDARG00000008937, ENSDARG00000025091, ENSDARG00000023578, ENSDARG00000006120, ENSDARG00000006615, ENSDARG00000006272, ENSDARG00000042690, ENSDARG00000043643, ENSDARG00000017821, ENSDARG00000010640, ENSDARG00000056666, ENSDARG00000058868, ENSDARG00000019995, ENSDARG00000005941, ENSDARG00000040485, ENSDARG00000009510, ENSDARG00000054186, ENSDARG00000015554,…	1134	129	3544	1.91389	1.84383e-08	1.84383e-08	1.88315e-08
GOTERM_BP_FAT	GO:0006355~regulation of transcription, DNA-dependent	173	6.27949	6.549e-10	ENSDARG00000059545, ENSDARG00000012656, ENSDARG00000057936, ENSDARG00000015399, ENSDARG00000009438, ENSDARG00000006615, ENSDARG00000006982, ENSDARG00000045685, ENSDARG00000004724, ENSDARG00000002933, ENSDARG00000043643, ENSDARG00000054632, ENSDARG00000071418, ENSDARG00000052654, ENSDARG00000035966, ENSDARG00000002216, ENSDARG00000031763, ENSDARG00000031768, ENSDARG00000053586, ENSDARG00000006754,…	1134	371	3544	1.45731	1.07731e-06	5.38655e-07	1.10028e-06
GOTERM_BP_FAT	GO:0051252~regulation of RNA metabolic process	173	6.27949	1.11009e-09	ENSDARG00000059545, ENSDARG00000012656, ENSDARG00000057936, ENSDARG00000015399, ENSDARG00000009438, ENSDARG00000006615, ENSDARG00000006982, ENSDARG00000045685, ENSDARG00000004724, ENSDARG00000002933, ENSDARG00000043643, ENSDARG00000054632, ENSDARG00000071418, ENSDARG00000052654, ENSDARG00000035966, ENSDARG00000002216, ENSDARG00000031763, ENSDARG00000031768, ENSDARG00000053586, ENSDARG00000006754,…	1134	373	3544	1.4495	1.82609e-06	6.08697e-07	1.86503e-06
GOTERM_BP_FAT	GO:0048729~tissue morphogenesis	43	1.5608	5.0428e-08	ENSDARG00000070805, ENSDARG00000020242, ENSDARG00000008937, ENSDARG00000037429, ENSDARG00000023578, ENSDARG00000008305, ENSDARG00000006272, ENSDARG00000042690, ENSDARG00000004111, ENSDARG00000019930, ENSDARG00000022712, ENSDARG00000016139, ENSDARG00000025641, ENSDARG00000019995, ENSDARG00000056218, ENSDARG00000061923, ENSDARG00000034894, ENSDARG00000005941, ENSDARG00000036090, ENSDARG00000053586,…	1134	65	3544	2.06745	8.29506e-05	2.07383e-05	8.47229e-05
GOTERM_BP_FAT	GO:0007166~cell surface receptor linked signal transduction	116	4.21053	1.26131e-07	ENSDARG00000070940, ENSDARG00000045788, ENSDARG00000061042, ENSDARG00000056230, ENSDARG00000021647, ENSDARG00000015717, ENSDARG00000070081, ENSDARG00000009958, ENSDARG00000058115, ENSDARG00000005942, ENSDARG00000031763, ENSDARG00000019995, ENSDARG00000034572, ENSDARG00000035820, ENSDARG00000058822, ENSDARG00000007889, ENSDARG00000077776, ENSDARG00000053987, ENSDARG00000070003, ENSDARG00000039041,…	1134	242	3544	1.49804	0.000207465	4.14964e-05	0.000211911
GOTERM_BP_FAT	GO:0060429~epithelium development	40	1.45191	2.33672e-07	ENSDARG00000070805, ENSDARG00000008937, ENSDARG00000037429, ENSDARG00000023578, ENSDARG00000008305, ENSDARG00000006272, ENSDARG00000058999, ENSDARG00000004111, ENSDARG00000019930, ENSDARG00000022712, ENSDARG00000016139, ENSDARG00000058868, ENSDARG00000025641, ENSDARG00000056218, ENSDARG00000061923, ENSDARG00000034894, ENSDARG00000005941, ENSDARG00000036090, ENSDARG00000053586, ENSDARG00000058822,…	1134	61	3544	2.04932	0.000384316	6.4063e-05	0.000392586
GOTERM_BP_FAT	GO:0003002~regionalization	51	1.85118	6.0786e-07	ENSDARG00000008937, ENSDARG00000006615, ENSDARG00000005600, ENSDARG00000006514, ENSDARG00000019746, ENSDARG00000059337, ENSDARG00000068365, ENSDARG00000019995, ENSDARG00000044417, ENSDARG00000053586, ENSDARG00000058822, ENSDARG00000079003, ENSDARG00000015554, ENSDARG00000078416, ENSDARG00000038843, ENSDARG00000018693, ENSDARG00000006110, ENSDARG00000027423, ENSDARG00000032963, ENSDARG00000008388,…	1134	87	3544	1.83203	0.00099943	0.000142837	0.00102125
GOTERM_BP_FAT	GO:0045449~regulation of transcription	216	7.84029	8.11539e-07	ENSDARG00000006038, ENSDARG00000008423, ENSDARG00000006982, ENSDARG00000045685, ENSDARG00000004724, ENSDARG00000002933, ENSDARG00000005033, ENSDARG00000043643, ENSDARG00000054632, ENSDARG00000052654, ENSDARG00000035966, ENSDARG00000002216, ENSDARG00000034956, ENSDARG00000003680, ENSDARG00000040700, ENSDARG00000005574, ENSDARG00000074752, ENSDARG00000035563, ENSDARG00000006560, ENSDARG00000008808,…	1134	521	3544	1.29568	0.00133409	0.000166859	0.00136344
GOTERM_BP_FAT	GO:0048568~embryonic organ development	48	1.74229	9.08723e-07	ENSDARG00000014259, ENSDARG00000005150, ENSDARG00000077467, ENSDARG00000037429, ENSDARG00000041799, ENSDARG00000006615, ENSDARG00000006120, ENSDARG00000058784, ENSDARG00000008305, ENSDARG00000043643, ENSDARG00000037879, ENSDARG00000019930, ENSDARG00000020785, ENSDARG00000010640, ENSDARG00000025641, ENSDARG00000034424, ENSDARG00000017929, ENSDARG00000019995, ENSDARG00000000241, ENSDARG00000040485,…	1134	81	3544	1.85198	0.00149373	0.000166081	0.00152671
GOTERM_BP_FAT	GO:0002009~morphogenesis of an epithelium	36	1.30672	1.16303e-06	ENSDARG00000070805, ENSDARG00000008937, ENSDARG00000023578, ENSDARG00000008305, ENSDARG00000006272, ENSDARG00000004111, ENSDARG00000019930, ENSDARG00000022712, ENSDARG00000016139, ENSDARG00000025641, ENSDARG00000056218, ENSDARG00000061923, ENSDARG00000005941, ENSDARG00000034894, ENSDARG00000053586, ENSDARG00000036090, ENSDARG00000058822, ENSDARG00000055630, ENSDARG00000078416, ENSDARG00000063522,…	1134	55	3544	2.0456	0.00191135	0.0001913	0.00195396
GOTERM_BP_FAT	GO:0007389~pattern specification process	64	2.32305	1.17151e-06	ENSDARG00000059545, ENSDARG00000008937, ENSDARG00000006615, ENSDARG00000005600, ENSDARG00000006514, ENSDARG00000019746, ENSDARG00000059337, ENSDARG00000068365, ENSDARG00000019995, ENSDARG00000061923, ENSDARG00000044417, ENSDARG00000053586, ENSDARG00000058822, ENSDARG00000079003, ENSDARG00000015554, ENSDARG00000078416, ENSDARG00000038843, ENSDARG00000018693, ENSDARG00000006110, ENSDARG00000027423,…	1134	119	3544	1.68079	0.00192528	0.000175179	0.00196821
GOTERM_BP_FAT	GO:0006928~cell motion	52	1.88748	3.241e-06	ENSDARG00000025091, ENSDARG00000006120, ENSDARG00000023578, ENSDARG00000032617, ENSDARG00000006272, ENSDARG00000042690, ENSDARG00000058868, ENSDARG00000061923, ENSDARG00000007889, ENSDARG00000004246, ENSDARG00000078416, ENSDARG00000034375, ENSDARG00000021225, ENSDARG00000018693, ENSDARG00000021032, ENSDARG00000006110, ENSDARG00000058259, ENSDARG00000019328, ENSDARG00000056184, ENSDARG00000008388,…	1134	93	3544	1.74744	0.00531727	0.000444189	0.00544499
GOTERM_BP_FAT	GO:0022610~biological adhesion	44	1.5971	6.62634e-06	ENSDARG00000062797, ENSDARG00000077467, ENSDARG00000006120, ENSDARG00000024785, ENSDARG00000027041, ENSDARG00000034344, ENSDARG00000006272, ENSDARG00000036279, ENSDARG00000014891, ENSDARG00000020785, ENSDARG00000005112, ENSDARG00000026165, ENSDARG00000029925, ENSDARG00000058543, ENSDARG00000055705, ENSDARG00000017466, ENSDARG00000056964, ENSDARG00000028236, ENSDARG00000018542, ENSDARG00000076564,…	1134	76	3544	1.80934	0.0108412	0.000838138	0.0111322
GOTERM_BP_FAT	GO:0007155~cell adhesion	44	1.5971	6.62634e-06	ENSDARG00000062797, ENSDARG00000077467, ENSDARG00000006120, ENSDARG00000024785, ENSDARG00000027041, ENSDARG00000034344, ENSDARG00000006272, ENSDARG00000036279, ENSDARG00000014891, ENSDARG00000020785, ENSDARG00000005112, ENSDARG00000026165, ENSDARG00000029925, ENSDARG00000058543, ENSDARG00000055705, ENSDARG00000017466, ENSDARG00000056964, ENSDARG00000028236, ENSDARG00000018542, ENSDARG00000076564,…	1134	76	3544	1.80934	0.0108412	0.000838138	0.0111322
GOTERM_BP_FAT	GO:0030902~hindbrain development	26	0.943739	8.578e-06	ENSDARG00000015567, ENSDARG00000006615, ENSDARG00000032617, ENSDARG00000017369, ENSDARG00000031307, ENSDARG00000019746, ENSDARG00000021664, ENSDARG00000045045, ENSDARG00000068365, ENSDARG00000026629, ENSDARG00000008174, ENSDARG00000010583, ENSDARG00000018693, ENSDARG00000077121, ENSDARG00000040649, ENSDARG00000056184, ENSDARG00000035563, ENSDARG00000055554, ENSDARG00000003399, ENSDARG00000056029,…	1134	37	3544	2.1961	0.0140118	0.00100741	0.0144107
GOTERM_BP_FAT	GO:0042471~ear morphogenesis	19	0.689655	1.77428e-05	ENSDARG00000014259, ENSDARG00000054186, ENSDARG00000009510, ENSDARG00000077467, ENSDARG00000018693, ENSDARG00000031095, ENSDARG00000015879, ENSDARG00000006615, ENSDARG00000027423, ENSDARG00000043643, ENSDARG00000010640, ENSDARG00000003399, ENSDARG00000034424, ENSDARG00000003293, ENSDARG00000068094, ENSDARG00000040485, ENSDARG00000028148, ENSDARG00000014626, ENSDARG00000031891	1134	24	3544	2.47413	0.0287653	0.00194392	0.0298051
GOTERM_BP_FAT	GO:0030182~neuron differentiation	45	1.63339	2.13281e-05	ENSDARG00000026784, ENSDARG00000042005, ENSDARG00000006120, ENSDARG00000024785, ENSDARG00000025011, ENSDARG00000009021, ENSDARG00000009020, ENSDARG00000007172, ENSDARG00000017369, ENSDARG00000002336, ENSDARG00000014891, ENSDARG00000021948, ENSDARG00000020219, ENSDARG00000022712, ENSDARG00000019566, ENSDARG00000058868, ENSDARG00000025641, ENSDARG00000034424, ENSDARG00000074335, ENSDARG00000053569,…	1134	81	3544	1.73623	0.0344768	0.00219042	0.0358269
GOTERM_BP_FAT	GO:0016477~cell migration	39	1.41561	3.35613e-05	ENSDARG00000025091, ENSDARG00000077467, ENSDARG00000023578, ENSDARG00000014796, ENSDARG00000006120, ENSDARG00000032617, ENSDARG00000017369, ENSDARG00000006272, ENSDARG00000042690, ENSDARG00000021948, ENSDARG00000022712, ENSDARG00000058868, ENSDARG00000061923, ENSDARG00000034894, ENSDARG00000055630, ENSDARG00000007889, ENSDARG00000026350, ENSDARG00000078416, ENSDARG00000010583, ENSDARG00000021225,…	1134	68	3544	1.79241	0.0537128	0.00324233	0.0563706
GOTERM_BP_FAT	GO:0035270~endocrine system development	17	0.61706	3.86298e-05	ENSDARG00000014259, ENSDARG00000017882, ENSDARG00000033680, ENSDARG00000008305, ENSDARG00000019930, ENSDARG00000054438, ENSDARG00000003399, ENSDARG00000058868, ENSDARG00000025641, ENSDARG00000026473, ENSDARG00000034894, ENSDARG00000068094, ENSDARG00000044417, ENSDARG00000028148, ENSDARG00000070069, ENSDARG00000014626, ENSDARG00000031891	1134	21	3544	2.52994	0.0615702	0.00352418	0.0648812
GOTERM_BP_FAT	GO:0042472~inner ear morphogenesis	18	0.653358	4.23611e-05	ENSDARG00000014259, ENSDARG00000054186, ENSDARG00000009510, ENSDARG00000077467, ENSDARG00000018693, ENSDARG00000015879, ENSDARG00000006615, ENSDARG00000027423, ENSDARG00000043643, ENSDARG00000010640, ENSDARG00000003399, ENSDARG00000034424, ENSDARG00000003293, ENSDARG00000068094, ENSDARG00000040485, ENSDARG00000028148, ENSDARG00000014626, ENSDARG00000031891	1134	23	3544	2.44582	0.0673129	0.00366094	0.0711462
GOTERM_BP_FAT	GO:0043009~chordate embryonic development	37	1.34301	4.46803e-05	ENSDARG00000011473, ENSDARG00000008937, ENSDARG00000008305, ENSDARG00000027744, ENSDARG00000006514, ENSDARG00000006272, ENSDARG00000002336, ENSDARG00000009779, ENSDARG00000020219, ENSDARG00000036292, ENSDARG00000068365, ENSDARG00000025641, ENSDARG00000036090, ENSDARG00000053586, ENSDARG00000058822, ENSDARG00000055630, ENSDARG00000005355, ENSDARG00000078416, ENSDARG00000021225, ENSDARG00000018693,…	1134	64	3544	1.80677	0.0708645	0.00366829	0.0750399
GOTERM_BP_FAT	GO:0009792~embryonic development ending in birth or egg hatching	37	1.34301	4.46803e-05	ENSDARG00000011473, ENSDARG00000008937, ENSDARG00000008305, ENSDARG00000027744, ENSDARG00000006514, ENSDARG00000006272, ENSDARG00000002336, ENSDARG00000009779, ENSDARG00000020219, ENSDARG00000036292, ENSDARG00000068365, ENSDARG00000025641, ENSDARG00000036090, ENSDARG00000053586, ENSDARG00000058822, ENSDARG00000055630, ENSDARG00000005355, ENSDARG00000078416, ENSDARG00000021225, ENSDARG00000018693,…	1134	64	3544	1.80677	0.0708645	0.00366829	0.0750399
GOTERM_BP_FAT	GO:0048812~neuron projection morphogenesis	25	0.907441	7.00602e-05	ENSDARG00000026784, ENSDARG00000042005, ENSDARG00000024785, ENSDARG00000009021, ENSDARG00000007172, ENSDARG00000017369, ENSDARG00000009020, ENSDARG00000014891, ENSDARG00000021948, ENSDARG00000022712, ENSDARG00000058868, ENSDARG00000025641, ENSDARG00000074335, ENSDARG00000004246, ENSDARG00000034375, ENSDARG00000018693, ENSDARG00000024933, ENSDARG00000019328, ENSDARG00000037433, ENSDARG00000042210,…	1134	38	3544	2.05607	0.108859	0.00547321	0.117642
GOTERM_BP_FAT	GO:0031175~neuron projection development	25	0.907441	7.00602e-05	ENSDARG00000026784, ENSDARG00000042005, ENSDARG00000024785, ENSDARG00000009021, ENSDARG00000007172, ENSDARG00000017369, ENSDARG00000009020, ENSDARG00000014891, ENSDARG00000021948, ENSDARG00000022712, ENSDARG00000058868, ENSDARG00000025641, ENSDARG00000074335, ENSDARG00000004246, ENSDARG00000034375, ENSDARG00000018693, ENSDARG00000024933, ENSDARG00000019328, ENSDARG00000037433, ENSDARG00000042210,…	1134	38	3544	2.05607	0.108859	0.00547321	0.117642
GOTERM_BP_FAT	GO:0016055~Wnt receptor signaling pathway	30	1.08893	7.0769e-05	ENSDARG00000077111, ENSDARG00000017155, ENSDARG00000014796, ENSDARG00000021664, ENSDARG00000068213, ENSDARG00000070081, ENSDARG00000071107, ENSDARG00000058868, ENSDARG00000070623, ENSDARG00000014673, ENSDARG00000034894, ENSDARG00000063190, ENSDARG00000058822, ENSDARG00000033978, ENSDARG00000032234, ENSDARG00000020053, ENSDARG00000077776, ENSDARG00000014147, ENSDARG00000038990, ENSDARG00000040649,…	1134	49	3544	1.9134	0.109898	0.0052778	0.118831
GOTERM_BP_FAT	GO:0007369~gastrulation	36	1.30672	8.07983e-05	ENSDARG00000070805, ENSDARG00000025091, ENSDARG00000008859, ENSDARG00000037429, ENSDARG00000023578, ENSDARG00000052947, ENSDARG00000006120, ENSDARG00000014796, ENSDARG00000006272, ENSDARG00000058999, ENSDARG00000042690, ENSDARG00000017821, ENSDARG00000022712, ENSDARG00000016139, ENSDARG00000056218, ENSDARG00000019995, ENSDARG00000005941, ENSDARG00000034894, ENSDARG00000055630, ENSDARG00000078416,…	1134	63	3544	1.78584	0.124464	0.0057624	0.135661
GOTERM_BP_FAT	GO:0043583~ear development	23	0.834846	8.29633e-05	ENSDARG00000014259, ENSDARG00000009510, ENSDARG00000054186, ENSDARG00000077467, ENSDARG00000018693, ENSDARG00000007561, ENSDARG00000031095, ENSDARG00000015879, ENSDARG00000006615, ENSDARG00000027423, ENSDARG00000043643, ENSDARG00000010640, ENSDARG00000003399, ENSDARG00000077353, ENSDARG00000034424, ENSDARG00000026473, ENSDARG00000068094, ENSDARG00000003293, ENSDARG00000040485, ENSDARG00000044417,…	1134	34	3544	2.11412	0.127577	0.00567054	0.139294
GOTERM_BP_FAT	GO:0050767~regulation of neurogenesis	18	0.653358	0.000102148	ENSDARG00000015002, ENSDARG00000004246, ENSDARG00000012019, ENSDARG00000077467, ENSDARG00000018693, ENSDARG00000024933, ENSDARG00000033680, ENSDARG00000009021, ENSDARG00000017369, ENSDARG00000002445, ENSDARG00000014891, ENSDARG00000021948, ENSDARG00000026811, ENSDARG00000052131, ENSDARG00000025641, ENSDARG00000006865, ENSDARG00000068094, ENSDARG00000040946	1134	24	3544	2.34392	0.154682	0.00669917	0.171479
GOTERM_BP_FAT	GO:0051960~regulation of nervous system development	18	0.653358	0.000102148	ENSDARG00000015002, ENSDARG00000004246, ENSDARG00000012019, ENSDARG00000077467, ENSDARG00000018693, ENSDARG00000024933, ENSDARG00000033680, ENSDARG00000009021, ENSDARG00000017369, ENSDARG00000002445, ENSDARG00000014891, ENSDARG00000021948, ENSDARG00000026811, ENSDARG00000052131, ENSDARG00000025641, ENSDARG00000006865, ENSDARG00000068094, ENSDARG00000040946	1134	24	3544	2.34392	0.154682	0.00669917	0.171479
GOTERM_BP_FAT	GO:0051674~localization of cell	41	1.4882	0.000129069	ENSDARG00000025091, ENSDARG00000077467, ENSDARG00000023578, ENSDARG00000014796, ENSDARG00000006120, ENSDARG00000032617, ENSDARG00000017369, ENSDARG00000006272, ENSDARG00000042690, ENSDARG00000021948, ENSDARG00000022712, ENSDARG00000058868, ENSDARG00000061923, ENSDARG00000034894, ENSDARG00000055630, ENSDARG00000007889, ENSDARG00000026350, ENSDARG00000078416, ENSDARG00000010583, ENSDARG00000021225,…	1134	76	3544	1.68597	0.191304	0.00813335	0.216624
GOTERM_BP_FAT	GO:0048870~cell motility	41	1.4882	0.000129069	ENSDARG00000025091, ENSDARG00000077467, ENSDARG00000023578, ENSDARG00000014796, ENSDARG00000006120, ENSDARG00000032617, ENSDARG00000017369, ENSDARG00000006272, ENSDARG00000042690, ENSDARG00000021948, ENSDARG00000022712, ENSDARG00000058868, ENSDARG00000061923, ENSDARG00000034894, ENSDARG00000055630, ENSDARG00000007889, ENSDARG00000026350, ENSDARG00000078416, ENSDARG00000010583, ENSDARG00000021225,…	1134	76	3544	1.68597	0.191304	0.00813335	0.216624
GOTERM_BP_FAT	GO:0007409~axonogenesis	24	0.871143	0.000141707	ENSDARG00000004246, ENSDARG00000034375, ENSDARG00000026784, ENSDARG00000018693, ENSDARG00000024933, ENSDARG00000042005, ENSDARG00000019328, ENSDARG00000024785, ENSDARG00000009021, ENSDARG00000042210, ENSDARG00000009020, ENSDARG00000017369, ENSDARG00000007172, ENSDARG00000014891, ENSDARG00000003971, ENSDARG00000056043, ENSDARG00000021948, ENSDARG00000022712, ENSDARG00000001220, ENSDARG00000058868,…	1134	37	3544	2.02717	0.207945	0.00859705	0.237812
GOTERM_BP_FAT	GO:0048667~cell morphogenesis involved in neuron differentiation	24	0.871143	0.000141707	ENSDARG00000004246, ENSDARG00000034375, ENSDARG00000026784, ENSDARG00000018693, ENSDARG00000024933, ENSDARG00000042005, ENSDARG00000019328, ENSDARG00000024785, ENSDARG00000009021, ENSDARG00000042210, ENSDARG00000009020, ENSDARG00000017369, ENSDARG00000007172, ENSDARG00000014891, ENSDARG00000003971, ENSDARG00000056043, ENSDARG00000021948, ENSDARG00000022712, ENSDARG00000001220, ENSDARG00000058868,…	1134	37	3544	2.02717	0.207945	0.00859705	0.237812
GOTERM_BP_FAT	GO:0048562~embryonic organ morphogenesis	28	1.01633	0.000153172	ENSDARG00000014259, ENSDARG00000077467, ENSDARG00000006615, ENSDARG00000008305, ENSDARG00000043643, ENSDARG00000010640, ENSDARG00000025641, ENSDARG00000034424, ENSDARG00000040485, ENSDARG00000054186, ENSDARG00000009510, ENSDARG00000010583, ENSDARG00000018693, ENSDARG00000031095, ENSDARG00000036912, ENSDARG00000015879, ENSDARG00000077121, ENSDARG00000027423, ENSDARG00000035563, ENSDARG00000003399,…	1134	46	3544	1.90231	0.222745	0.00895917	0.25703
GOTERM_BP_FAT	GO:0048839~inner ear development	22	0.798548	0.000171784	ENSDARG00000014259, ENSDARG00000009510, ENSDARG00000054186, ENSDARG00000077467, ENSDARG00000018693, ENSDARG00000007561, ENSDARG00000015879, ENSDARG00000006615, ENSDARG00000027423, ENSDARG00000043643, ENSDARG00000010640, ENSDARG00000003399, ENSDARG00000077353, ENSDARG00000034424, ENSDARG00000026473, ENSDARG00000068094, ENSDARG00000003293, ENSDARG00000040485, ENSDARG00000044417, ENSDARG00000028148,…	1134	33	3544	2.08348	0.246186	0.00969781	0.288219
GOTERM_BP_FAT	GO:0001667~ameboidal cell migration	30	1.08893	0.000190721	ENSDARG00000025091, ENSDARG00000077467, ENSDARG00000023578, ENSDARG00000006120, ENSDARG00000014796, ENSDARG00000032617, ENSDARG00000017369, ENSDARG00000006272, ENSDARG00000042690, ENSDARG00000021948, ENSDARG00000022712, ENSDARG00000034894, ENSDARG00000055630, ENSDARG00000078416, ENSDARG00000021225, ENSDARG00000018693, ENSDARG00000021032, ENSDARG00000006110, ENSDARG00000058259, ENSDARG00000040649,…	1134	51	3544	1.83836	0.26931	0.0104043	0.319943
GOTERM_BP_FAT	GO:0007167~enzyme linked receptor protein signaling pathway	25	0.907441	0.000223275	ENSDARG00000016153, ENSDARG00000005600, ENSDARG00000017321, ENSDARG00000045094, ENSDARG00000009021, ENSDARG00000015717, ENSDARG00000015176, ENSDARG00000058115, ENSDARG00000011948, ENSDARG00000031763, ENSDARG00000019995, ENSDARG00000036096, ENSDARG00000019728, ENSDARG00000007889, ENSDARG00000063207, ENSDARG00000040346, ENSDARG00000070003, ENSDARG00000016858, ENSDARG00000027423, ENSDARG00000030364,…	1134	40	3544	1.95326	0.307418	0.0117794	0.374458
GOTERM_BP_FAT	GO:0060284~regulation of cell development	18	0.653358	0.000224645	ENSDARG00000015002, ENSDARG00000004246, ENSDARG00000012019, ENSDARG00000077467, ENSDARG00000018693, ENSDARG00000024933, ENSDARG00000033680, ENSDARG00000009021, ENSDARG00000017369, ENSDARG00000002445, ENSDARG00000014891, ENSDARG00000021948, ENSDARG00000026811, ENSDARG00000052131, ENSDARG00000025641, ENSDARG00000006865, ENSDARG00000068094, ENSDARG00000040946	1134	25	3544	2.25016	0.308977	0.011483	0.376751
GOTERM_BP_FAT	GO:0007411~axon guidance	16	0.580762	0.000231132	ENSDARG00000004246, ENSDARG00000034375, ENSDARG00000026784, ENSDARG00000019328, ENSDARG00000009021, ENSDARG00000017369, ENSDARG00000007172, ENSDARG00000042210, ENSDARG00000014891, ENSDARG00000056043, ENSDARG00000022712, ENSDARG00000001220, ENSDARG00000058868, ENSDARG00000025641, ENSDARG00000038446, ENSDARG00000074335	1134	21	3544	2.38112	0.316313	0.0114568	0.387611
GOTERM_BP_FAT	GO:0009953~dorsal/ventral pattern formation	23	0.834846	0.000282293	ENSDARG00000015554, ENSDARG00000078416, ENSDARG00000038843, ENSDARG00000037429, ENSDARG00000018968, ENSDARG00000055381, ENSDARG00000006110, ENSDARG00000005600, ENSDARG00000033680, ENSDARG00000052846, ENSDARG00000078308, ENSDARG00000029370, ENSDARG00000044774, ENSDARG00000026534, ENSDARG00000003399, ENSDARG00000025641, ENSDARG00000019362, ENSDARG00000019995, ENSDARG00000068094, ENSDARG00000019728,…	1134	36	3544	1.99667	0.371511	0.013567	0.473217
GOTERM_BP_FAT	GO:0000904~cell morphogenesis involved in differentiation	26	0.943739	0.000330326	ENSDARG00000026784, ENSDARG00000042005, ENSDARG00000024785, ENSDARG00000009021, ENSDARG00000007172, ENSDARG00000017369, ENSDARG00000009020, ENSDARG00000014891, ENSDARG00000021948, ENSDARG00000022712, ENSDARG00000058868, ENSDARG00000025641, ENSDARG00000074335, ENSDARG00000004246, ENSDARG00000078416, ENSDARG00000034375, ENSDARG00000018693, ENSDARG00000024933, ENSDARG00000019328, ENSDARG00000037433,…	1134	43	3544	1.88967	0.419274	0.0154079	0.553527
GOTERM_BP_FAT	GO:0048666~neuron development	32	1.16152	0.000344537	ENSDARG00000026784, ENSDARG00000042005, ENSDARG00000006120, ENSDARG00000024785, ENSDARG00000025011, ENSDARG00000009021, ENSDARG00000009020, ENSDARG00000007172, ENSDARG00000017369, ENSDARG00000002336, ENSDARG00000014891, ENSDARG00000021948, ENSDARG00000022712, ENSDARG00000058868, ENSDARG00000025641, ENSDARG00000074335, ENSDARG00000009510, ENSDARG00000004246, ENSDARG00000034375, ENSDARG00000018693,…	1134	57	3544	1.75451	0.432696	0.0156228	0.577276
GOTERM_BP_FAT	GO:0007507~heart development	41	1.4882	0.000378441	ENSDARG00000059545, ENSDARG00000005150, ENSDARG00000020242, ENSDARG00000041799, ENSDARG00000014796, ENSDARG00000006120, ENSDARG00000017369, ENSDARG00000008305, ENSDARG00000006272, ENSDARG00000019930, ENSDARG00000017821, ENSDARG00000002216, ENSDARG00000016139, ENSDARG00000058868, ENSDARG00000034424, ENSDARG00000070623, ENSDARG00000017803, ENSDARG00000019995, ENSDARG00000016404, ENSDARG00000029738,…	1134	79	3544	1.62195	0.463481	0.0166877	0.633913
GOTERM_BP_FAT	GO:0007498~mesoderm development	17	0.61706	0.00048817	ENSDARG00000021225, ENSDARG00000018693, ENSDARG00000037429, ENSDARG00000018968, ENSDARG00000006120, ENSDARG00000015611, ENSDARG00000021907, ENSDARG00000006272, ENSDARG00000042690, ENSDARG00000021948, ENSDARG00000036548, ENSDARG00000044774, ENSDARG00000003399, ENSDARG00000076571, ENSDARG00000019995, ENSDARG00000014091, ENSDARG00000058822	1134	24	3544	2.2137	0.552123	0.020916	0.817009
GOTERM_BP_FAT	GO:0060026~convergent extension	23	0.834846	0.000488485	ENSDARG00000070805, ENSDARG00000078416, ENSDARG00000063522, ENSDARG00000018693, ENSDARG00000040346, ENSDARG00000006110, ENSDARG00000023578, ENSDARG00000040649, ENSDARG00000004111, ENSDARG00000008388, ENSDARG00000036548, ENSDARG00000016139, ENSDARG00000012066, ENSDARG00000010432, ENSDARG00000056218, ENSDARG00000005941, ENSDARG00000011370, ENSDARG00000015472, ENSDARG00000069937, ENSDARG00000034894,…	1134	37	3544	1.9427	0.552355	0.0203982	0.817534
GOTERM_BP_FAT	GO:0045664~regulation of neuron differentiation	13	0.471869	0.00050101	ENSDARG00000015002, ENSDARG00000004246, ENSDARG00000012019, ENSDARG00000018693, ENSDARG00000024933, ENSDARG00000009021, ENSDARG00000017369, ENSDARG00000002445, ENSDARG00000014891, ENSDARG00000021948, ENSDARG00000026811, ENSDARG00000006865, ENSDARG00000068094	1134	16	3544	2.53924	0.561488	0.0203983	0.838412
GOTERM_BP_FAT	GO:0035295~tube development	32	1.16152	0.000517226	ENSDARG00000059545, ENSDARG00000005150, ENSDARG00000008937, ENSDARG00000077467, ENSDARG00000041799, ENSDARG00000006615, ENSDARG00000006120, ENSDARG00000017369, ENSDARG00000006272, ENSDARG00000019930, ENSDARG00000014891, ENSDARG00000002216, ENSDARG00000058868, ENSDARG00000016139, ENSDARG00000036869, ENSDARG00000017803, ENSDARG00000019995, ENSDARG00000036090, ENSDARG00000055630, ENSDARG00000054186,…	1134	58	3544	1.72426	0.573037	0.0205435	0.865438
GOTERM_BP_FAT	GO:0001568~blood vessel development	32	1.16152	0.000517226	ENSDARG00000011473, ENSDARG00000005150, ENSDARG00000030307, ENSDARG00000052094, ENSDARG00000030125, ENSDARG00000040614, ENSDARG00000037429, ENSDARG00000017321, ENSDARG00000017542, ENSDARG00000054632, ENSDARG00000019930, ENSDARG00000015717, ENSDARG00000020785, ENSDARG00000077264, ENSDARG00000056964, ENSDARG00000034894, ENSDARG00000040893, ENSDARG00000076564, ENSDARG00000033428, ENSDARG00000052470,…	1134	58	3544	1.72426	0.573037	0.0205435	0.865438
GOTERM_BP_FAT	GO:0030030~cell projection organization	35	1.27042	0.000687368	ENSDARG00000062799, ENSDARG00000059545, ENSDARG00000026784, ENSDARG00000042005, ENSDARG00000024785, ENSDARG00000009021, ENSDARG00000009020, ENSDARG00000007172, ENSDARG00000017369, ENSDARG00000004111, ENSDARG00000014891, ENSDARG00000021948, ENSDARG00000022712, ENSDARG00000016139, ENSDARG00000017385, ENSDARG00000058868, ENSDARG00000025641, ENSDARG00000061923, ENSDARG00000074335, ENSDARG00000028943,…	1134	66	3544	1.65731	0.677325	0.0265718	1.14858
GOTERM_BP_FAT	GO:0001944~vasculature development	32	1.16152	0.00110218	ENSDARG00000011473, ENSDARG00000005150, ENSDARG00000030307, ENSDARG00000052094, ENSDARG00000030125, ENSDARG00000040614, ENSDARG00000037429, ENSDARG00000017321, ENSDARG00000017542, ENSDARG00000054632, ENSDARG00000019930, ENSDARG00000015717, ENSDARG00000020785, ENSDARG00000077264, ENSDARG00000056964, ENSDARG00000034894, ENSDARG00000040893, ENSDARG00000076564, ENSDARG00000033428, ENSDARG00000052470,…	1134	60	3544	1.66678	0.837013	0.0413105	1.83571
GOTERM_BP_FAT	GO:0060538~skeletal muscle organ development	12	0.435572	0.00119687	ENSDARG00000016153, ENSDARG00000020785, ENSDARG00000009438, ENSDARG00000031796, ENSDARG00000009021, ENSDARG00000007277, ENSDARG00000056964, ENSDARG00000008487, ENSDARG00000029830, ENSDARG00000044417, ENSDARG00000030110, ENSDARG00000076564	1134	15	3544	2.50018	0.860549	0.0437861	1.99194
GOTERM_BP_FAT	GO:0030900~forebrain development	20	0.725953	0.00121488	ENSDARG00000014259, ENSDARG00000015554, ENSDARG00000057936, ENSDARG00000015966, ENSDARG00000006120, ENSDARG00000014746, ENSDARG00000033680, ENSDARG00000032617, ENSDARG00000039041, ENSDARG00000045045, ENSDARG00000031894, ENSDARG00000038429, ENSDARG00000059337, ENSDARG00000001220, ENSDARG00000025641, ENSDARG00000026473, ENSDARG00000068094, ENSDARG00000044417, ENSDARG00000045444, ENSDARG00000070069	1134	32	3544	1.95326	0.864623	0.0434647	2.02162

## Sheet: D. rerio_GO_ALL_h3K27Ac
Biological Process functions of genes associated with all H3K27Ac peaks in D. Rerio (DAVID)
Category	Term	Count	%	PValue	Genes	List.Total	Pop.Hits	Pop.Total	Fold.Enrichment	Bonferroni	Benjamini	FDR
GOTERM_BP_FAT	GO:0048598~embryonic morphogenesis	57	1.48438	1.148e-07	ENSDARG00000014259, ENSDARG00000070805, ENSDARG00000008937, ENSDARG00000025091, ENSDARG00000006272, ENSDARG00000012025, ENSDARG00000042690, ENSDARG00000043643, ENSDARG00000010640, ENSDARG00000056666, ENSDARG00000009510, ENSDARG00000054186, ENSDARG00000015554, ENSDARG00000078416, ENSDARG00000018693, ENSDARG00000031095, ENSDARG00000036912, ENSDARG00000058259, ENSDARG00000024371, ENSDARG00000068246,…	813	129	3544	1.92614	0.000171725	0.000171725	0.000190682
GOTERM_BP_FAT	GO:0006928~cell motion	43	1.11979	1.30744e-06	ENSDARG00000025091, ENSDARG00000026784, ENSDARG00000014796, ENSDARG00000000472, ENSDARG00000076317, ENSDARG00000032617, ENSDARG00000007172, ENSDARG00000006272, ENSDARG00000078366, ENSDARG00000044954, ENSDARG00000042690, ENSDARG00000021948, ENSDARG00000025641, ENSDARG00000061923, ENSDARG00000074335, ENSDARG00000007889, ENSDARG00000026350, ENSDARG00000004246, ENSDARG00000078416, ENSDARG00000034375,…	813	93	3544	2.01553	0.00195402	0.000977486	0.00217163
GOTERM_BP_FAT	GO:0007166~cell surface receptor linked signal transduction	88	2.29167	1.30826e-06	ENSDARG00000037545, ENSDARG00000012353, ENSDARG00000016153, ENSDARG00000038116, ENSDARG00000056230, ENSDARG00000006514, ENSDARG00000042690, ENSDARG00000053344, ENSDARG00000021647, ENSDARG00000009958, ENSDARG00000055659, ENSDARG00000070538, ENSDARG00000058115, ENSDARG00000043317, ENSDARG00000042259, ENSDARG00000005942, ENSDARG00000014673, ENSDARG00000031763, ENSDARG00000044827, ENSDARG00000007889,…	813	242	3544	1.58515	0.00195525	0.000652174	0.002173
GOTERM_BP_FAT	GO:0016337~cell-cell adhesion	19	0.494792	1.42149e-06	ENSDARG00000018693, ENSDARG00000020072, ENSDARG00000024371, ENSDARG00000024785, ENSDARG00000027041, ENSDARG00000034344, ENSDARG00000017591, ENSDARG00000078366, ENSDARG00000006272, ENSDARG00000019815, ENSDARG00000060637, ENSDARG00000021442, ENSDARG00000039677, ENSDARG00000029925, ENSDARG00000058543, ENSDARG00000052494, ENSDARG00000055305, ENSDARG00000074369, ENSDARG00000077641	813	27	3544	3.06756	0.00212429	0.000531496	0.00236107
GOTERM_BP_FAT	GO:0007389~pattern specification process	51	1.32812	1.84996e-06	ENSDARG00000008937, ENSDARG00000045936, ENSDARG00000006514, ENSDARG00000019815, ENSDARG00000012025, ENSDARG00000055659, ENSDARG00000059337, ENSDARG00000061923, ENSDARG00000044417, ENSDARG00000015554, ENSDARG00000078416, ENSDARG00000003446, ENSDARG00000038843, ENSDARG00000018693, ENSDARG00000014571, ENSDARG00000032963, ENSDARG00000008388, ENSDARG00000003399, ENSDARG00000055026, ENSDARG00000024043,…	813	119	3544	1.86821	0.00276372	0.000553356	0.00307274
GOTERM_BP_FAT	GO:0022610~biological adhesion	37	0.963542	1.89672e-06	ENSDARG00000024785, ENSDARG00000027041, ENSDARG00000034344, ENSDARG00000028507, ENSDARG00000006272, ENSDARG00000078366, ENSDARG00000019815, ENSDARG00000036279, ENSDARG00000060637, ENSDARG00000029925, ENSDARG00000026165, ENSDARG00000052494, ENSDARG00000058543, ENSDARG00000018162, ENSDARG00000006604, ENSDARG00000071863, ENSDARG00000018693, ENSDARG00000020072, ENSDARG00000024371, ENSDARG00000043658,…	813	76	3544	2.12222	0.00283348	0.000472805	0.00315041
GOTERM_BP_FAT	GO:0007155~cell adhesion	37	0.963542	1.89672e-06	ENSDARG00000024785, ENSDARG00000027041, ENSDARG00000034344, ENSDARG00000028507, ENSDARG00000006272, ENSDARG00000078366, ENSDARG00000019815, ENSDARG00000036279, ENSDARG00000060637, ENSDARG00000029925, ENSDARG00000026165, ENSDARG00000052494, ENSDARG00000058543, ENSDARG00000018162, ENSDARG00000006604, ENSDARG00000071863, ENSDARG00000018693, ENSDARG00000020072, ENSDARG00000024371, ENSDARG00000043658,…	813	76	3544	2.12222	0.00283348	0.000472805	0.00315041
GOTERM_BP_FAT	GO:0043009~chordate embryonic development	31	0.807292	1.79203e-05	ENSDARG00000011473, ENSDARG00000008937, ENSDARG00000012378, ENSDARG00000027744, ENSDARG00000006272, ENSDARG00000006514, ENSDARG00000019815, ENSDARG00000020219, ENSDARG00000036292, ENSDARG00000025641, ENSDARG00000036090, ENSDARG00000052091, ENSDARG00000012944, ENSDARG00000078416, ENSDARG00000027397, ENSDARG00000018693, ENSDARG00000020053, ENSDARG00000036912, ENSDARG00000024371, ENSDARG00000033680,…	813	64	3544	2.11147	0.0264529	0.00382254	0.0297615
GOTERM_BP_FAT	GO:0009792~embryonic development ending in birth or egg hatching	31	0.807292	1.79203e-05	ENSDARG00000011473, ENSDARG00000008937, ENSDARG00000012378, ENSDARG00000027744, ENSDARG00000006272, ENSDARG00000006514, ENSDARG00000019815, ENSDARG00000020219, ENSDARG00000036292, ENSDARG00000025641, ENSDARG00000036090, ENSDARG00000052091, ENSDARG00000012944, ENSDARG00000078416, ENSDARG00000027397, ENSDARG00000018693, ENSDARG00000020053, ENSDARG00000036912, ENSDARG00000024371, ENSDARG00000033680,…	813	64	3544	2.11147	0.0264529	0.00382254	0.0297615
GOTERM_BP_FAT	GO:0045449~regulation of transcription	158	4.11458	2.18894e-05	ENSDARG00000008278, ENSDARG00000056130, ENSDARG00000055751, ENSDARG00000006982, ENSDARG00000067607, ENSDARG00000010657, ENSDARG00000074498, ENSDARG00000002933, ENSDARG00000005033, ENSDARG00000045681, ENSDARG00000045936, ENSDARG00000043643, ENSDARG00000052654, ENSDARG00000001785, ENSDARG00000002216, ENSDARG00000069469, ENSDARG00000031763, ENSDARG00000006754, ENSDARG00000036074, ENSDARG00000070818,…	813	521	3544	1.32197	0.0322165	0.00408499	0.036352
GOTERM_BP_FAT	GO:0003002~regionalization	38	0.989583	3.01398e-05	ENSDARG00000011473, ENSDARG00000008937, ENSDARG00000012378, ENSDARG00000078308, ENSDARG00000053493, ENSDARG00000027744, ENSDARG00000010381, ENSDARG00000045936, ENSDARG00000006514, ENSDARG00000019815, ENSDARG00000071497, ENSDARG00000031219, ENSDARG00000020219, ENSDARG00000036292, ENSDARG00000059337, ENSDARG00000025641, ENSDARG00000070914, ENSDARG00000044417, ENSDARG00000052091, ENSDARG00000015554,…	813	87	3544	1.904	0.0440884	0.00499746	0.0500505
GOTERM_BP_FAT	GO:0006355~regulation of transcription, DNA-dependent	117	3.04688	5.54737e-05	ENSDARG00000006982, ENSDARG00000055751, ENSDARG00000002933, ENSDARG00000045936, ENSDARG00000045681, ENSDARG00000043643, ENSDARG00000052654, ENSDARG00000001785, ENSDARG00000002216, ENSDARG00000031763, ENSDARG00000006754, ENSDARG00000036074, ENSDARG00000070818, ENSDARG00000078416, ENSDARG00000008174, ENSDARG00000034956, ENSDARG00000003680, ENSDARG00000023316, ENSDARG00000006560, ENSDARG00000000151,…	813	371	3544	1.37472	0.0796406	0.00826476	0.092102
GOTERM_BP_FAT	GO:0051252~regulation of RNA metabolic process	117	3.04688	7.21912e-05	ENSDARG00000006982, ENSDARG00000055751, ENSDARG00000002933, ENSDARG00000045936, ENSDARG00000045681, ENSDARG00000043643, ENSDARG00000052654, ENSDARG00000001785, ENSDARG00000002216, ENSDARG00000031763, ENSDARG00000006754, ENSDARG00000036074, ENSDARG00000070818, ENSDARG00000078416, ENSDARG00000008174, ENSDARG00000034956, ENSDARG00000003680, ENSDARG00000023316, ENSDARG00000006560, ENSDARG00000000151,…	813	373	3544	1.36735	0.102374	0.00977032	0.119842
GOTERM_BP_FAT	GO:0048729~tissue morphogenesis	30	0.78125	7.72788e-05	ENSDARG00000070805, ENSDARG00000008937, ENSDARG00000020242, ENSDARG00000006272, ENSDARG00000019815, ENSDARG00000042690, ENSDARG00000019930, ENSDARG00000025641, ENSDARG00000056218, ENSDARG00000061923, ENSDARG00000036090, ENSDARG00000078416, ENSDARG00000027397, ENSDARG00000018693, ENSDARG00000040346, ENSDARG00000018968, ENSDARG00000024371, ENSDARG00000020053, ENSDARG00000033680, ENSDARG00000040649,…	813	65	3544	2.01192	0.109181	0.0095882	0.128283
GOTERM_BP_FAT	GO:0007219~Notch signaling pathway	12	0.3125	0.000118617	ENSDARG00000070538, ENSDARG00000020219, ENSDARG00000052094, ENSDARG00000021389, ENSDARG00000045003, ENSDARG00000005612, ENSDARG00000013168, ENSDARG00000052139, ENSDARG00000070425, ENSDARG00000006514, ENSDARG00000032963, ENSDARG00000037879	813	16	3544	3.26937	0.162606	0.0135581	0.19684
GOTERM_BP_FAT	GO:0007167~enzyme linked receptor protein signaling pathway	21	0.546875	0.000151243	ENSDARG00000016153, ENSDARG00000012649, ENSDARG00000026294, ENSDARG00000040346, ENSDARG00000016858, ENSDARG00000031219, ENSDARG00000015176, ENSDARG00000021938, ENSDARG00000070903, ENSDARG00000043317, ENSDARG00000058115, ENSDARG00000042259, ENSDARG00000011948, ENSDARG00000044422, ENSDARG00000031763, ENSDARG00000027199, ENSDARG00000004635, ENSDARG00000036096, ENSDARG00000069105, ENSDARG00000011188,…	813	40	3544	2.28856	0.202502	0.0160327	0.250917
GOTERM_BP_FAT	GO:0016477~cell migration	30	0.78125	0.000205778	ENSDARG00000025091, ENSDARG00000014796, ENSDARG00000032617, ENSDARG00000000472, ENSDARG00000006272, ENSDARG00000042690, ENSDARG00000021948, ENSDARG00000061923, ENSDARG00000007889, ENSDARG00000026350, ENSDARG00000078416, ENSDARG00000027397, ENSDARG00000026294, ENSDARG00000018693, ENSDARG00000021032, ENSDARG00000058259, ENSDARG00000024371, ENSDARG00000040649, ENSDARG00000057633, ENSDARG00000056184,…	813	68	3544	1.92316	0.264993	0.0203158	0.341248
GOTERM_BP_FAT	GO:0009952~anterior/posterior pattern formation	26	0.677083	0.000237449	ENSDARG00000011473, ENSDARG00000008937, ENSDARG00000012378, ENSDARG00000053493, ENSDARG00000027744, ENSDARG00000006514, ENSDARG00000045936, ENSDARG00000010381, ENSDARG00000019815, ENSDARG00000071497, ENSDARG00000036292, ENSDARG00000020219, ENSDARG00000059337, ENSDARG00000025641, ENSDARG00000044417, ENSDARG00000052091, ENSDARG00000012944, ENSDARG00000078416, ENSDARG00000027397, ENSDARG00000018693,…	813	56	3544	2.0239	0.299013	0.0219594	0.393672
GOTERM_BP_FAT	GO:0009880~embryonic pattern specification	12	0.3125	0.000266832	ENSDARG00000012944, ENSDARG00000044774, ENSDARG00000003399, ENSDARG00000006911, ENSDARG00000014571, ENSDARG00000027199, ENSDARG00000011662, ENSDARG00000061923, ENSDARG00000006514, ENSDARG00000002445, ENSDARG00000028148, ENSDARG00000019815	813	17	3544	3.07706	0.329166	0.0232107	0.442286
GOTERM_BP_FAT	GO:0001756~somitogenesis	18	0.46875	0.000300511	ENSDARG00000011473, ENSDARG00000078416, ENSDARG00000008937, ENSDARG00000012944, ENSDARG00000027397, ENSDARG00000018693, ENSDARG00000012378, ENSDARG00000011662, ENSDARG00000027744, ENSDARG00000006514, ENSDARG00000019815, ENSDARG00000032963, ENSDARG00000036292, ENSDARG00000020219, ENSDARG00000003399, ENSDARG00000025641, ENSDARG00000015472, ENSDARG00000052091	813	33	3544	2.37773	0.362138	0.0246702	0.49798
GOTERM_BP_FAT	GO:0051674~localization of cell	32	0.833333	0.000330469	ENSDARG00000025091, ENSDARG00000014796, ENSDARG00000032617, ENSDARG00000000472, ENSDARG00000006272, ENSDARG00000042690, ENSDARG00000021948, ENSDARG00000061923, ENSDARG00000007889, ENSDARG00000026350, ENSDARG00000078416, ENSDARG00000027397, ENSDARG00000026294, ENSDARG00000018693, ENSDARG00000021032, ENSDARG00000058259, ENSDARG00000024371, ENSDARG00000040649, ENSDARG00000057633, ENSDARG00000056184,…	813	76	3544	1.83544	0.390102	0.0256887	0.547496
GOTERM_BP_FAT	GO:0048870~cell motility	32	0.833333	0.000330469	ENSDARG00000025091, ENSDARG00000014796, ENSDARG00000032617, ENSDARG00000000472, ENSDARG00000006272, ENSDARG00000042690, ENSDARG00000021948, ENSDARG00000061923, ENSDARG00000007889, ENSDARG00000026350, ENSDARG00000078416, ENSDARG00000027397, ENSDARG00000026294, ENSDARG00000018693, ENSDARG00000021032, ENSDARG00000058259, ENSDARG00000024371, ENSDARG00000040649, ENSDARG00000057633, ENSDARG00000056184,…	813	76	3544	1.83544	0.390102	0.0256887	0.547496
GOTERM_BP_FAT	GO:0001667~ameboidal cell migration	24	0.625	0.000350128	ENSDARG00000078416, ENSDARG00000025091, ENSDARG00000027397, ENSDARG00000026294, ENSDARG00000018693, ENSDARG00000021032, ENSDARG00000024371, ENSDARG00000058259, ENSDARG00000014796, ENSDARG00000032617, ENSDARG00000040649, ENSDARG00000057633, ENSDARG00000006272, ENSDARG00000042690, ENSDARG00000056184, ENSDARG00000008388, ENSDARG00000021948, ENSDARG00000036548, ENSDARG00000014013, ENSDARG00000044422,…	813	51	3544	2.05137	0.407784	0.0258541	0.579976
GOTERM_BP_FAT	GO:0002009~morphogenesis of an epithelium	25	0.651042	0.000478732	ENSDARG00000070805, ENSDARG00000008937, ENSDARG00000006272, ENSDARG00000019815, ENSDARG00000019930, ENSDARG00000025641, ENSDARG00000056218, ENSDARG00000061923, ENSDARG00000036090, ENSDARG00000078416, ENSDARG00000027397, ENSDARG00000018693, ENSDARG00000040346, ENSDARG00000024371, ENSDARG00000020053, ENSDARG00000033680, ENSDARG00000040649, ENSDARG00000008388, ENSDARG00000036548, ENSDARG00000044774,…	813	55	3544	1.98144	0.51147	0.0335369	0.79221
GOTERM_BP_FAT	GO:0030902~hindbrain development	19	0.494792	0.000497903	ENSDARG00000008174, ENSDARG00000027397, ENSDARG00000018693, ENSDARG00000015567, ENSDARG00000056130, ENSDARG00000032617, ENSDARG00000077121, ENSDARG00000040649, ENSDARG00000031307, ENSDARG00000045936, ENSDARG00000035563, ENSDARG00000021664, ENSDARG00000056184, ENSDARG00000003399, ENSDARG00000018492, ENSDARG00000044422, ENSDARG00000026629, ENSDARG00000028148, ENSDARG00000011188	813	37	3544	2.23849	0.525288	0.0332988	0.82381
GOTERM_BP_FAT	GO:0040036~regulation of fibroblast growth factor receptor signaling pathway	9	0.234375	0.000621152	ENSDARG00000026811, ENSDARG00000056648, ENSDARG00000056666, ENSDARG00000038843, ENSDARG00000077353, ENSDARG00000070914, ENSDARG00000078308, ENSDARG00000068732, ENSDARG00000074319	813	11	3544	3.56659	0.605261	0.0396086	1.02675
GOTERM_BP_FAT	GO:0007411~axon guidance	13	0.338542	0.000709239	ENSDARG00000004246, ENSDARG00000034375, ENSDARG00000026784, ENSDARG00000019328, ENSDARG00000076317, ENSDARG00000007172, ENSDARG00000078366, ENSDARG00000044954, ENSDARG00000056043, ENSDARG00000025641, ENSDARG00000038446, ENSDARG00000005645, ENSDARG00000074335	813	21	3544	2.69853	0.654028	0.0432613	1.17155
GOTERM_BP_FAT	GO:0007423~sensory organ development	45	1.17188	0.00083685	ENSDARG00000014259, ENSDARG00000035750, ENSDARG00000056130, ENSDARG00000032617, ENSDARG00000003845, ENSDARG00000044062, ENSDARG00000045936, ENSDARG00000006272, ENSDARG00000009681, ENSDARG00000012025, ENSDARG00000037421, ENSDARG00000021924, ENSDARG00000043643, ENSDARG00000010640, ENSDARG00000018492, ENSDARG00000053855, ENSDARG00000070913, ENSDARG00000006911, ENSDARG00000044417, ENSDARG00000009510,…	813	124	3544	1.58195	0.714197	0.0488639	1.38097

## Sheet: GO-cSPARRs(DAVID)
Biological Process functions for genes associated to cSPARRs (DAVID)
Category	Term	Count	%	PValue	Genes	List.Total	Pop.Hits	Pop.Total	Fold.Enrichment	Bonferroni	Benjamini	FDR
GOTERM_BP_FAT	GO:0006355~regulation of transcription, DNA-dependent	26	19.1176	5.42e-08	ENSDARG00000057721, ENSDARG00000020759, ENSDARG00000052947, ENSDARG00000077840, ENSDARG00000008852, ENSDARG00000052695, ENSDARG00000058004, ENSDARG00000070538, ENSDARG00000036292, ENSDARG00000058011, ENSDARG00000018688, ENSDARG00000076120, ENSDARG00000070623, ENSDARG00000031763, ENSDARG00000042904, ENSDARG00000036096, ENSDARG00000003165, ENSDARG00000006754, ENSDARG00000006192, ENSDARG00000009510,…	76	371	3544	3.26798	1.74e-05	1.74e-05	7.31e-05
GOTERM_BP_FAT	GO:0045449~regulation of transcription	31	22.7941	5.65e-08	ENSDARG00000057721, ENSDARG00000020759, ENSDARG00000052947, ENSDARG00000077840, ENSDARG00000008852, ENSDARG00000005033, ENSDARG00000052695, ENSDARG00000058004, ENSDARG00000058011, ENSDARG00000036292, ENSDARG00000070538, ENSDARG00000018688, ENSDARG00000076120, ENSDARG00000070623, ENSDARG00000070913, ENSDARG00000056642, ENSDARG00000031763, ENSDARG00000042904, ENSDARG00000036096, ENSDARG00000003165,…	76	521	3544	2.77462	1.82e-05	9.08e-06	7.63e-05
GOTERM_BP_FAT	GO:0051252~regulation of RNA metabolic process	26	19.1176	6.04e-08	ENSDARG00000057721, ENSDARG00000020759, ENSDARG00000052947, ENSDARG00000077840, ENSDARG00000008852, ENSDARG00000052695, ENSDARG00000058004, ENSDARG00000070538, ENSDARG00000036292, ENSDARG00000058011, ENSDARG00000018688, ENSDARG00000076120, ENSDARG00000070623, ENSDARG00000031763, ENSDARG00000042904, ENSDARG00000036096, ENSDARG00000003165, ENSDARG00000006754, ENSDARG00000006192, ENSDARG00000009510,…	76	373	3544	3.25046	1.94e-05	6.46e-06	8.15e-05
GOTERM_BP_FAT	GO:0006350~transcription	17	12.5	0.000156971	ENSDARG00000013575, ENSDARG00000057721, ENSDARG00000008852, ENSDARG00000021916, ENSDARG00000052695, ENSDARG00000058011, ENSDARG00000070538, ENSDARG00000021938, ENSDARG00000062915, ENSDARG00000070913, ENSDARG00000070623, ENSDARG00000004060, ENSDARG00000031763, ENSDARG00000056642, ENSDARG00000026395, ENSDARG00000036096, ENSDARG00000003165, ENSDARG00000040926	76	277	3544	2.86187	0.0491429	0.0125189	0.211716
Protein Domains overrepresented in proteins associated to cSPARRs. (DAVID)
Category	Term	Count	%	PValue	Genes	List.Total	Pop.Hits	Pop.Total	Fold.Enrichment	Bonferroni	Benjamini	FDR
INTERPRO	IPR012287:Homeodomain-related	10	7.35294	7.44986e-05	ENSDARG00000009510, ENSDARG00000057721, ENSDARG00000036292, ENSDARG00000058011, ENSDARG00000035285, ENSDARG00000052947, ENSDARG00000034043, ENSDARG00000077840, ENSDARG00000021916, ENSDARG00000058004	100	113	6159	5.45044	0.0166231	0.0166231	0.0951334
INTERPRO	IPR001356:Homeobox	9	6.61765	0.000334968	ENSDARG00000009510, ENSDARG00000057721, ENSDARG00000036292, ENSDARG00000058011, ENSDARG00000052947, ENSDARG00000034043, ENSDARG00000077840, ENSDARG00000021916, ENSDARG00000058004	100	109	6159	5.08541	0.0726094	0.0369888	0.427093
INTERPRO	IPR013087:Zinc finger, C2H2-type/integrase, DNA-binding	7	5.14706	0.000846606	ENSDARG00000071497, ENSDARG00000006288, ENSDARG00000015567, ENSDARG00000031307, ENSDARG00000060808, ENSDARG00000074319, ENSDARG00000061147	100	70	6159	6.159	0.17351	0.0615469	1.0762
INTERPRO	IPR017970:Homeobox, conserved site	8	5.88235	0.000938798	ENSDARG00000009510, ENSDARG00000057721, ENSDARG00000036292, ENSDARG00000058011, ENSDARG00000052947, ENSDARG00000034043, ENSDARG00000021916, ENSDARG00000058004	100	98	6159	5.02776	0.190492	0.0514608	1.19275
INTERPRO	IPR015880:Zinc finger, C2H2-like	9	6.61765	0.000981556	ENSDARG00000071497, ENSDARG00000006288, ENSDARG00000015567, ENSDARG00000045485, ENSDARG00000076120, ENSDARG00000031307, ENSDARG00000060808, ENSDARG00000076657, ENSDARG00000074319, ENSDARG00000061147	100	128	6159	4.33055	0.19825	0.0432295	1.24676
INTERPRO	IPR007087:Zinc finger, C2H2-type	9	6.61765	0.00145431	ENSDARG00000071497, ENSDARG00000006288, ENSDARG00000015567, ENSDARG00000045485, ENSDARG00000076120, ENSDARG00000031307, ENSDARG00000060808, ENSDARG00000076657, ENSDARG00000074319, ENSDARG00000061147	100	136	6159	4.07581	0.279247	0.0531139	1.84212
INTERPRO	IPR003893:Iroquois-class homeodomain protein	3	2.20588	0.0024784	ENSDARG00000009510, ENSDARG00000052947, ENSDARG00000034043	100	5	6159	36.954	0.427838	0.0766637	3.12047
INTERPRO	IPR013790:Dwarfin	3	2.20588	0.00509635	ENSDARG00000021938, ENSDARG00000031763, ENSDARG00000036096	100	7	6159	26.3957	0.68324	0.133854	6.31897
INTERPRO	IPR001132:SMAD domain, Dwarfin-type	3	2.20588	0.00509635	ENSDARG00000021938, ENSDARG00000031763, ENSDARG00000036096	100	7	6159	26.3957	0.68324	0.133854	6.31897
INTERPRO	IPR003619:MAD homology 1, Dwarfin-type	3	2.20588	0.00509635	ENSDARG00000021938, ENSDARG00000031763, ENSDARG00000036096	100	7	6159	26.3957	0.68324	0.133854	6.31897
INTERPRO	IPR013019:MAD homology, MH1	3	2.20588	0.00509635	ENSDARG00000021938, ENSDARG00000031763, ENSDARG00000036096	100	7	6159	26.3957	0.68324	0.133854	6.31897
INTERPRO	IPR001438:EGF-like, type 2	3	2.20588	0.00855525	ENSDARG00000052094, ENSDARG00000021389, ENSDARG00000052139	100	9	6159	20.53	0.855317	0.193298	10.3957
INTERPRO	IPR011991:Winged helix repressor DNA-binding	6	4.41176	0.0094778	ENSDARG00000013575, ENSDARG00000018688, ENSDARG00000020759, ENSDARG00000045485, ENSDARG00000076120, ENSDARG00000026395, ENSDARG00000042904	100	81	6159	4.56222	0.88266	0.192868	11.4551
INTERPRO	IPR017855:SMAD domain-like	3	2.20588	0.0127999	ENSDARG00000021938, ENSDARG00000031763, ENSDARG00000036096	100	11	6159	16.7973	0.944898	0.231647	15.175
INTERPRO	IPR013629:Zinc finger-associated region	2	1.47059	0.0318923	ENSDARG00000003165, ENSDARG00000040926, ENSDARG00000052695	100	2	6159	61.59	0.999319	0.455411	33.9049
INTERPRO	IPR008297:Notch	2	1.47059	0.0318923	ENSDARG00000052094, ENSDARG00000052139	100	2	6159	61.59	0.999319	0.455411	33.9049
INTERPRO	IPR011656:Notch, NODP region	2	1.47059	0.0318923	ENSDARG00000052094, ENSDARG00000052139	100	2	6159	61.59	0.999319	0.455411	33.9049
INTERPRO	IPR003068:Transcription factor COUP	2	1.47059	0.0318923	ENSDARG00000003165, ENSDARG00000040926, ENSDARG00000052695	100	2	6159	61.59	0.999319	0.455411	33.9049
INTERPRO	IPR010660:Notch, NOD region	2	1.47059	0.0318923	ENSDARG00000052094, ENSDARG00000052139	100	2	6159	61.59	0.999319	0.455411	33.9049
INTERPRO	IPR000910:High mobility group, HMG1/HMG2	3	2.20588	0.0440527	ENSDARG00000015536, ENSDARG00000070913, ENSDARG00000011582	100	21	6159	8.79857	0.99996	0.541481	43.7612
INTERPRO	IPR000800:Notch region	2	1.47059	0.0474587	ENSDARG00000052094, ENSDARG00000052139	100	3	6159	41.06	0.999982	0.542246	46.2682

## Sheet: GO-cSPARRS(PANTHER)
Biological Process functions of genes associated to cSPARRs (PANTHER)
Biological Process Term	Background	cSPARRs	expected	Fold Change	P-value
regulation of transcription from RNA polymerase II promoter	640	48	12.87	3.72	4.49E-14
transcription from RNA polymerase II promoter	878	54	17.65	3.05	1.34E-12
transcription	880	54	17.69	3.05	1.47E-12
ectoderm development	456	35	9.17	3.81	7.72E-10
nervous system development	417	32	8.38	3.82	7.89E-09
system development	639	39	12.85	3.03	3.36E-08
developmental process	995	45	20.0	2.25	1.15E-05
nucleobase, nucleoside, nucleotide and nucleic acid metabolic process	1674	61	33.65	1.81	5.32E-05
embryonic development	155	14	3.12	4.48	5.89E-04
pattern specification process	141	13	2.83	4.59	1.08E-03
segment specification	88	10	1.77	5.64	2.29E-03
signal transduction	1237	43	24.87	1.72	2.29E-02
mesoderm development	451	21	9.07	2.31	4.81E-02
